# Supplementary material for: Update and Application of a Deep Learning Model for the Prediction of Interactions between Drugs Used by Patients with Multiple Sclerosis
Source: Pharmaceutics. 2023 Dec 19;16(1):3. doi: 10.3390/pharmaceutics16010003 (PMC10819178; doi:10.3390/pharmaceutics16010003)
Supplement: Supplementary file 1 [file pharmaceutics-16-00003-s001.zip]

Archive with 5 entries (5 files):
- Supplemental_Document.pdf
- Supplemental_Table_S1.xlsx
- Supplemental_Table_S2.xlsx
- Supplemental_Table_S3.xlsx
- Supplemental_Table_S4.xlsx
