# Supplementary material for: Update and Application of a Deep Learning Model for the Prediction of Interactions between Drugs Used by Patients with Multiple Sclerosis
Source: Pharmaceutics. 2023 Dec 19;16(1):3. doi: 10.3390/pharmaceutics16010003 (PMC10819178; doi:10.3390/pharmaceutics16010003)
Supplement: Supplementary file 1 [file pharmaceutics-16-00003-s001.zip › Supplemental_Table_S1.xlsx]

## Sheet: Supplemental Table 1
DDI type	Description	Negative health effect
DDI type 1	Drug1 can cause a decrease in the absorption of Drug2 resulting in a reduced serum concentration and potentially a decrease in efficacy.	FALSE
DDI type 2	Drug1 can cause an increase in the absorption of Drug2 resulting in an increased serum concentration and potentially a worsening of adverse effects.	FALSE
DDI type 3	The absorption of Drug2 can be decreased when combined with Drug1.	FALSE
DDI type 4	The bioavailability of Drug2 can be decreased when combined with Drug1.	FALSE
DDI type 5	The bioavailability of Drug2 can be increased when combined with Drug1.	FALSE
DDI type 6	The metabolism of Drug2 can be decreased when combined with Drug1.	FALSE
DDI type 7	The metabolism of Drug2 can be increased when combined with Drug1.	FALSE
DDI type 8	The protein binding of Drug2 can be decreased when combined with Drug1.	FALSE
DDI type 9	The serum concentration of Drug2 can be decreased when it is combined with Drug1.	FALSE
DDI type 10	The serum concentration of Drug2 can be increased when it is combined with Drug1.	FALSE
DDI type 11	The serum concentration of the active metabolites of Drug2 can be increased when Drug2 is used in combination with Drug1.	FALSE
DDI type 12	The serum concentration of the active metabolites of Drug2 can be reduced when Drug2 is used in combination with Drug1 resulting in a loss in efficacy.	FALSE
DDI type 13	The therapeutic efficacy of Drug2 can be decreased when used in combination with Drug1.	FALSE
DDI type 14	The therapeutic efficacy of Drug2 can be increased when used in combination with Drug1.	FALSE
DDI type 15	Drug1 may decrease the excretion rate of Drug2 which could result in a higher serum level.	FALSE
DDI type 16	Drug1 may increase the excretion rate of Drug2 which could result in a lower serum level and potentially a reduction in efficacy.	FALSE
DDI type 17	Drug1 may decrease the cardiotoxic activities of Drug2.	FALSE
DDI type 18	Drug1 may increase the cardiotoxic activities of Drug2.	TRUE
DDI type 19	Drug1 may increase the central neurotoxic activities of Drug2.	TRUE
DDI type 20	Drug1 may increase the hepatotoxic activities of Drug2.	TRUE
DDI type 21	Drug1 may increase the nephrotoxic activities of Drug2.	TRUE
DDI type 22	Drug1 may increase the neurotoxic activities of Drug2.	TRUE
DDI type 23	Drug1 may increase the ototoxic activities of Drug2.	TRUE
DDI type 24	Drug1 may decrease effectiveness of Drug2 as a diagnostic agent.	FALSE
DDI type 25	The risk of a hypersensitivity reaction to Drug2 is increased when it is combined with Drug1.	TRUE
DDI type 26	The risk or severity of adverse effects can be increased when Drug1 is combined with Drug2.	TRUE
DDI type 27	The risk or severity of bleeding can be increased when Drug1 is combined with Drug2.	TRUE
DDI type 28	The risk or severity of heart failure can be increased when Drug2 is combined with Drug1.	TRUE
DDI type 29	The risk or severity of hyperkalemia can be increased when Drug1 is combined with Drug2.	TRUE
DDI type 30	The risk or severity of hypertension can be increased when Drug2 is combined with Drug1.	TRUE
DDI type 31	The risk or severity of hypotension can be increased when Drug1 is combined with Drug2.	TRUE
DDI type 32	The risk or severity of QTc prolongation can be increased when Drug1 is combined with Drug2.	TRUE
DDI type 33	Drug1 may decrease the analgesic activities of Drug2.	FALSE
DDI type 34	Drug1 may decrease the anticoagulant activities of Drug2.	FALSE
DDI type 35	Drug1 may decrease the antihypertensive activities of Drug2.	FALSE
DDI type 36	Drug1 may decrease the antiplatelet activities of Drug2.	FALSE
DDI type 37	Drug1 may decrease the bronchodilatory activities of Drug2.	FALSE
DDI type 38	Drug1 may decrease the diuretic activities of Drug2.	FALSE
DDI type 39	Drug1 may decrease the neuromuscular blocking activities of Drug2.	FALSE
DDI type 40	Drug1 may decrease the sedative activities of Drug2.	FALSE
DDI type 41	Drug1 may decrease the stimulatory activities of Drug2.	FALSE
DDI type 42	Drug1 may decrease the vasoconstricting activities of Drug2.	FALSE
DDI type 43	Drug1 may increase the adverse neuromuscular activities of Drug2.	FALSE
DDI type 44	Drug1 may increase the analgesic activities of Drug2.	FALSE
DDI type 45	Drug1 may increase the anticholinergic activities of Drug2.	FALSE
DDI type 46	Drug1 may increase the anticoagulant activities of Drug2.	FALSE
DDI type 47	Drug1 may increase the antihypertensive activities of Drug2.	FALSE
DDI type 48	Drug1 may increase the antiplatelet activities of Drug2.	FALSE
DDI type 49	Drug1 may increase the antipsychotic activities of Drug2.	FALSE
DDI type 50	Drug1 may increase the arrhythmogenic activities of Drug2.	FALSE
DDI type 51	Drug1 may increase the atrioventricular blocking (AV block) activities of Drug2.	FALSE
DDI type 52	Drug1 may increase the bradycardic activities of Drug2.	FALSE
DDI type 53	Drug1 may increase the bronchoconstrictory activities of Drug2.	FALSE
DDI type 54	Drug1 may increase the central nervous system depressant (CNS depressant) activities of Drug2.	FALSE
DDI type 55	Drug1 may increase the central nervous system depressant (CNS depressant) and hypertensive activities of Drug2.	FALSE
DDI type 56	Drug1 may increase the constipating activities of Drug2.	FALSE
DDI type 57	Drug1 may increase the dermatologic adverse activities of Drug2.	FALSE
DDI type 58	Drug1 may increase the fluid retaining activities of Drug2.	FALSE
DDI type 59	Drug1 may increase the hypercalcemic activities of Drug2.	FALSE
DDI type 60	Drug1 may increase the hyperglycemic activities of Drug2.	FALSE
DDI type 61	Drug1 may increase the hyperkalemic activities of Drug2.	FALSE
DDI type 62	Drug1 may increase the hypertensive activities of Drug2.	FALSE
DDI type 63	Drug1 may increase the hypocalcemic activities of Drug2.	FALSE
DDI type 64	Drug1 may increase the hypoglycemic activities of Drug2.	FALSE
DDI type 65	Drug1 may increase the hypokalemic activities of Drug2.	FALSE
DDI type 66	Drug1 may increase the hyponatremic activities of Drug2.	FALSE
DDI type 67	Drug1 may increase the hypotensive activities of Drug2.	FALSE
DDI type 68	Drug1 may increase the hypotensive and central nervous system depressant (CNS depressant) activities of Drug2.	FALSE
DDI type 69	Drug1 may increase the immunosuppressive activities of Drug2.	FALSE
DDI type 70	Drug1 may increase the myelosuppressive activities of Drug2.	FALSE
DDI type 71	Drug1 may increase the myopathic rhabdomyolysis activities of Drug2.	FALSE
DDI type 72	Drug1 may increase the neuroexcitatory activities of Drug2.	FALSE
DDI type 73	Drug1 may increase the neuromuscular blocking activities of Drug2.	FALSE
DDI type 74	Drug1 may increase the orthostatic hypotensive activities of Drug2.	FALSE
DDI type 75	Drug1 may increase the photosensitizing activities of Drug2.	FALSE
DDI type 76	Drug1 may increase the QTc-prolonging activities of Drug2.	FALSE
DDI type 77	Drug1 may increase the respiratory depressant activities of Drug2.	FALSE
DDI type 78	Drug1 may increase the sedative activities of Drug2.	FALSE
DDI type 79	Drug1 may increase the serotonergic activities of Drug2.	FALSE
DDI type 80	Drug1 may increase the stimulatory activities of Drug2.	FALSE
DDI type 81	Drug1 may increase the tachycardic activities of Drug2.	FALSE
DDI type 82	Drug1 may increase the thrombogenic activities of Drug2.	FALSE
DDI type 83	Drug1 may increase the ulcerogenic activities of Drug2.	FALSE
DDI type 84	Drug1 may increase the vasoconstricting activities of Drug2.	FALSE
DDI type 85	Drug1 may increase the vasodilatory activities of Drug2.	FALSE
DDI type 86	Drug1 may increase the vasopressor activities of Drug2.	FALSE

## Sheet: Legend
General sentence structures of the 86 DDI types that are distinguished by DeepDDI.
DDI = drug-drug interaction
QTc = QT interval corrected for heart rate
