# Supplementary material for: Update and Application of a Deep Learning Model for the Prediction of Interactions between Drugs Used by Patients with Multiple Sclerosis
Source: Pharmaceutics. 2023 Dec 19;16(1):3. doi: 10.3390/pharmaceutics16010003 (PMC10819178; doi:10.3390/pharmaceutics16010003)
Supplement: Supplementary file 1 [file pharmaceutics-16-00003-s001.zip › Supplemental_Table_S2.xlsx]

## Sheet: Supplemental Table 2
Drug compound	DrugBank accession	Small molecule	DMD for MS	Medication access 1	Number of patients 2
3'-Uridinemonophosphate	DB02714	TRUE	FALSE	OTC	1
Acemetacin	DB13783	TRUE	FALSE	Rx	2
Acetaminophen	DB00316	TRUE	FALSE	Rx or OTC	49
Acetylcysteine	DB06151	TRUE	FALSE	OTC	1
Acetylsalicylic acid	DB00945	TRUE	FALSE	Rx or OTC	55
Acyclovir	DB00787	TRUE	FALSE	Rx	2
Agomelatine	DB06594	TRUE	FALSE	Rx	2
Alemtuzumab	DB00087	FALSE	TRUE	Rx	20
Alendronic acid	DB00630	TRUE	FALSE	Rx	9
Alfacalcidol	DB01436	TRUE	FALSE	Rx	2
Aliskiren	DB09026	TRUE	FALSE	Rx	2
Allopurinol	DB00437	TRUE	FALSE	Rx	3
alpha-Lactalbumin	DB15182	FALSE	FALSE	OTC	1
Amantadine	DB00915	TRUE	FALSE	Rx	2
Amiloride	DB00594	TRUE	FALSE	Rx	1
Amitriptyline	DB00321	TRUE	FALSE	Rx	12
Amlodipine	DB00381	TRUE	FALSE	Rx	25
Apixaban	DB06605	TRUE	FALSE	Rx	2
Arabica coffee bean	DB10666	FALSE	FALSE	OTC	1
Arginine	DB00125	TRUE	FALSE	OTC	1
Arnica montana	DB14297	FALSE	FALSE	OTC	1
Ascorbic acid	DB00126	TRUE	FALSE	OTC	20
Atorvastatin	DB01076	TRUE	FALSE	Rx	16
Avena sativa flowering top	DB14253	FALSE	FALSE	OTC	1
Azathioprine	DB00993	TRUE	TRUE	Rx	4
Baclofen	DB00181	TRUE	FALSE	Rx	79
Beclomethasone dipropionate	DB00394	TRUE	FALSE	Rx	4
Bendroflumethiazide	DB00436	TRUE	FALSE	Rx	1
Benserazide	DB12783	TRUE	FALSE	Rx	15
Benzocaine	DB01086	TRUE	FALSE	OTC	1
Beta carotene	DB06755	TRUE	FALSE	Rx or OTC	3
Betahistine	DB06698	TRUE	FALSE	Rx	1
Betamethasone	DB00443	TRUE	FALSE	Rx	2
Bethanechol	DB01019	TRUE	FALSE	Rx	2
Bicalutamide	DB01128	TRUE	FALSE	Rx	2
Bimatoprost	DB00905	TRUE	FALSE	Rx	1
Biotin	DB00121	TRUE	FALSE	OTC	15
Bisacodyl	DB09020	TRUE	FALSE	OTC	2
Bisoprolol	DB00612	TRUE	FALSE	Rx	51
Black cohosh	DB13975	FALSE	FALSE	OTC	2
Bornaprine	DB13619	TRUE	FALSE	Rx	1
Brinzolamide	DB01194	TRUE	FALSE	Rx	3
Brivaracetam	DB05541	TRUE	FALSE	Rx	1
Bromelains	DB13281	FALSE	FALSE	OTC	1
Budesonide	DB01222	TRUE	FALSE	Rx	9
Bupropion	DB01156	TRUE	FALSE	Rx	3
Butylscopolamine	DB09300	TRUE	FALSE	OTC	1
Caffeine	DB00201	TRUE	FALSE	OTC	3
Calcipotriol	DB02300	TRUE	FALSE	Rx	4
Calcium	DB01373	TRUE	FALSE	Rx or OTC	32
Candesartan	DB13919	TRUE	FALSE	Rx	19
Cannabidiol	DB09061	TRUE	FALSE	Rx or OTC	45
Captopril	DB01197	TRUE	FALSE	Rx	1
Carbamazepine	DB00564	TRUE	FALSE	Rx	10
Carbidopa	DB00190	TRUE	FALSE	Rx	1
Carboxymethylcellulose	DB11059	FALSE	FALSE	OTC	1
Carvedilol	DB01136	TRUE	FALSE	Rx	2
Cefpodoxime	DB01416	TRUE	FALSE	Rx	1
Cefuroxime	DB01112	TRUE	FALSE	Rx	1
Cetirizine	DB00341	TRUE	FALSE	OTC	9
Cetylpyridinium	DB11073	TRUE	FALSE	OTC	1
Chlormadinone	DB13528	TRUE	FALSE	Rx	5
Chlorpheniramine	DB01114	TRUE	FALSE	OTC	1
Cholecalciferol	DB00169	TRUE	FALSE	Rx or OTC	287
Choline	DB00122	TRUE	FALSE	OTC	1
Chromium	DB11136	TRUE	FALSE	OTC	1
Cinnarizine	DB00568	TRUE	FALSE	Rx	2
Ciprofloxacin	DB00537	TRUE	FALSE	Rx	3
Citalopram	DB00215	TRUE	FALSE	Rx	33
Citrus bioflavonoids	DB14586	FALSE	FALSE	OTC	2
Cladribine	DB00242	TRUE	TRUE	Rx	6
Clonazepam	DB01068	TRUE	FALSE	Rx	1
Clopidogrel	DB00758	TRUE	FALSE	Rx	3
Clostridium botulinum	DB14223	FALSE	FALSE	Rx	2
Clozapine	DB00363	TRUE	FALSE	Rx	1
Codeine	DB00318	TRUE	FALSE	Rx	1
Conjugated estrogens	DB00286	FALSE	FALSE	Rx	1
Cortisone	DB14681	TRUE	FALSE	Rx	1
Cranberry	DB10631	FALSE	FALSE	OTC	5
Cromoglicic acid	DB01003	TRUE	FALSE	Rx	1
Curcumin	DB11672	TRUE	FALSE	OTC	6
Cyanocobalamin	DB00115	TRUE	FALSE	Rx or OTC	97
Cyclopentolate	DB00979	TRUE	FALSE	Rx	1
Cystine	DB00138	TRUE	FALSE	OTC	1
Dalfampridine	DB06637	TRUE	FALSE	Rx	52
Darbepoetin alfa	DB00012	FALSE	FALSE	Rx	1
Darifenacin	DB00496	TRUE	FALSE	Rx	5
Denosumab	DB06643	FALSE	FALSE	Rx	2
Desfesoterodine	DB15578	TRUE	FALSE	Rx	2
Desloratadine	DB00967	TRUE	FALSE	Rx	4
Desogestrel	DB00304	TRUE	FALSE	Rx	12
Dexamethasone	DB01234	TRUE	FALSE	Rx	8
Diazepam	DB00829	TRUE	FALSE	Rx	1
Diclofenac	DB00586	TRUE	FALSE	Rx or OTC	8
Dienogest	DB09123	TRUE	FALSE	Rx	11
Dihydrotachysterol	DB01070	TRUE	FALSE	Rx	1
Dimenhydrinate	DB00985	TRUE	FALSE	Rx	5
Dimethyl fumarate	DB08908	TRUE	TRUE	Rx	33
Dimethyl sulfone	DB14090	TRUE	FALSE	OTC	1
Dimetindene	DB08801	TRUE	FALSE	Rx	21
Diphenhydramine	DB01075	TRUE	FALSE	OTC	2
Dorzolamide	DB00869	TRUE	FALSE	Rx	4
Doxazosin	DB00590	TRUE	FALSE	Rx	1
Doxepin	DB01142	TRUE	FALSE	Rx	5
Doxycycline	DB00254	TRUE	FALSE	Rx	1
Dronabinol	DB00470	TRUE	FALSE	Rx or OTC	47
Drospirenone	DB01395	TRUE	FALSE	Rx or OTC	2
Duloxetine	DB00476	TRUE	FALSE	Rx	21
Dydrogesterone	DB00378	TRUE	FALSE	Rx	3
Enalapril	DB00584	TRUE	FALSE	Rx	5
Enoxaparin	DB01225	FALSE	FALSE	Rx	128
Eplerenone	DB00700	TRUE	FALSE	Rx	1
Eprosartan	DB00876	TRUE	FALSE	Rx	1
Escitalopram	DB01175	TRUE	FALSE	Rx	19
Esomeprazole	DB00736	TRUE	FALSE	Rx	1
Estradiol	DB00783	TRUE	FALSE	Rx	7
Estradiol valerate	DB13956	TRUE	FALSE	Rx	5
Estriol	DB04573	TRUE	FALSE	Rx	2
Ethinylestradiol	DB00977	TRUE	FALSE	Rx or OTC	41
Etofenamate	DB08984	TRUE	FALSE	OTC	1
Etonogestrel	DB00294	TRUE	FALSE	Rx	2
Etoricoxib	DB01628	TRUE	FALSE	Rx	6
Eucalyptus oil	DB11114	FALSE	FALSE	OTC	1
Evening primrose oil	DB11358	FALSE	FALSE	OTC	1
Ezetimibe	DB00973	TRUE	FALSE	Rx	2
Fenofibrate	DB01039	TRUE	FALSE	Rx	1
Fenoterol	DB01288	TRUE	FALSE	Rx	1
Fentanyl	DB00813	TRUE	FALSE	Rx	1
Fexofenadine	DB00950	TRUE	FALSE	Rx	1
Finasteride	DB01216	TRUE	FALSE	Rx	3
Fingolimod	DB08868	TRUE	TRUE	Rx	41
Fish oil	DB13961	FALSE	FALSE	OTC	2
Flecainide	DB01195	TRUE	FALSE	Rx	1
Fluconazole	DB00196	TRUE	FALSE	Rx	1
Fludrocortisone	DB00687	TRUE	FALSE	Rx	2
Fluoxetine	DB00472	TRUE	FALSE	Rx	3
Flupirtine	DB06623	TRUE	FALSE	Rx	1
Fluprednidene acetate	DB14634	TRUE	FALSE	Rx	1
Fluticasone furoate	DB08906	TRUE	FALSE	Rx	1
Fluticasone propionate	DB00588	TRUE	FALSE	Rx	2
Fluvastatin	DB01095	TRUE	FALSE	Rx	2
Folic acid	DB00158	TRUE	FALSE	Rx or OTC	30
Formoterol	DB00983	TRUE	FALSE	Rx	8
Foscarnet	DB00529	TRUE	FALSE	Rx	1
Frankincense	DB16592	FALSE	FALSE	OTC	2
Furosemide	DB00695	TRUE	FALSE	Rx	3
Gabapentin	DB00996	TRUE	FALSE	Rx	28
Ginkgo biloba	DB01381	FALSE	FALSE	OTC	2
Glatiramer	DB05259	FALSE	TRUE	Rx	58
Glimepiride	DB00222	TRUE	FALSE	Rx	3
Goserelin	DB00014	TRUE	FALSE	Rx	1
Green tea leaf	DB14307	FALSE	FALSE	OTC	1
Hesperidin	DB04703	TRUE	FALSE	OTC	1
Horseradish	DB10674	FALSE	FALSE	OTC	2
Human immunoglobulin G	DB00028	FALSE	FALSE	Rx	8
Hyaluronic acid	DB08818	TRUE	FALSE	OTC	4
Hydrochlorothiazide	DB00999	TRUE	FALSE	Rx	19
Hydrocortisone	DB00741	TRUE	FALSE	Rx	4
Hydromorphone	DB00327	TRUE	FALSE	Rx	1
Hydrotalcite	DB13322	TRUE	FALSE	OTC	1
Hydroxychloroquine	DB01611	TRUE	FALSE	Rx	1
Hypromellose	DB11075	FALSE	FALSE	OTC	4
Ibandronate	DB00710	TRUE	FALSE	Rx	2
Ibuprofen	DB01050	TRUE	FALSE	Rx or OTC	107
Indapamide	DB00808	TRUE	FALSE	Rx	2
Inositol	DB13178	TRUE	FALSE	OTC	1
Insulin aspart	DB01306	FALSE	FALSE	Rx	3
Insulin degludec	DB09564	FALSE	FALSE	Rx	2
Insulin glargine	DB00047	FALSE	FALSE	Rx	11
Insulin glulisine	DB01309	FALSE	FALSE	Rx	2
Insulin human	DB00030	FALSE	FALSE	Rx	6
Insulin lispro	DB00046	FALSE	FALSE	Rx	3
Interferon beta-1a	DB00060	FALSE	TRUE	Rx	65
Interferon beta-1b	DB00068	FALSE	TRUE	Rx	25
Iodine	DB05382	TRUE	FALSE	Rx or OTC	4
Ipratropium	DB00332	TRUE	FALSE	Rx	1
Irbesartan	DB01029	TRUE	FALSE	Rx	2
Iron	DB01592	TRUE	FALSE	Rx or OTC	8
Isoniazid	DB00951	TRUE	FALSE	Rx	1
Ivabradine	DB09083	TRUE	FALSE	Rx	3
Lactic acid	DB04398	TRUE	FALSE	Rx	1
Lactobacillus acidophilus	DB15823	FALSE	FALSE	Rx	1
Lactulose	DB00581	TRUE	FALSE	OTC	4
Lamotrigine	DB00555	TRUE	FALSE	Rx	5
Latanoprost	DB00654	TRUE	FALSE	Rx	4
Lavender oil	DB14566	FALSE	FALSE	OTC	1
Lecithin, soybean	DB14161	FALSE	FALSE	OTC	1
Leflunomide	DB01097	TRUE	FALSE	Rx	3
Lercanidipine	DB00528	TRUE	FALSE	Rx	5
Levetiracetam	DB01202	TRUE	FALSE	Rx	5
Levocarnitine	DB00583	TRUE	FALSE	OTC	1
Levodopa	DB01235	TRUE	FALSE	Rx	15
Levofloxacin	DB01137	TRUE	FALSE	Rx	2
Levonorgestrel	DB00367	TRUE	FALSE	Rx or OTC	19
Levothyroxine	DB00451	TRUE	FALSE	Rx	84
Lidocaine	DB00281	TRUE	FALSE	Rx	1
Linseed oil	DB11357	FALSE	FALSE	OTC	2
Liothyronine	DB00279	TRUE	FALSE	Rx	1
Lipoic acid	DB00166	TRUE	FALSE	OTC	2
Lisinopril	DB00722	TRUE	FALSE	Rx	4
Lithium carbonate	DB14509	TRUE	FALSE	Rx	1
Loratadine	DB00455	TRUE	FALSE	OTC	2
Lorazepam	DB00186	TRUE	FALSE	Rx	2
Losartan	DB00678	TRUE	FALSE	Rx	1
Lovastatin	DB00227	TRUE	FALSE	Rx	1
Lutein	DB00137	TRUE	FALSE	OTC	2
Magnesium	DB14513	TRUE	FALSE	Rx or OTC	64
Medrogestone	DB09124	TRUE	FALSE	Rx	1
Medroxyprogesterone acetate	DB00603	TRUE	FALSE	Rx	2
Melatonin	DB01065	TRUE	FALSE	Rx	1
Meloxicam	DB00814	TRUE	FALSE	Rx	1
Memantine	DB01043	TRUE	FALSE	Rx	3
Menaquinone 6	DB14936	TRUE	FALSE	Rx or OTC	28
Mesalazine	DB00244	TRUE	FALSE	Rx	4
Metamizole	DB04817	TRUE	FALSE	Rx	29
Metformin	DB00331	TRUE	FALSE	Rx	9
Methimazole	DB00763	TRUE	FALSE	Rx	4
Methionine	DB00134	TRUE	FALSE	Rx or OTC	5
Methotrexate	DB00563	TRUE	FALSE	Rx	1
Methylprednisolone	DB00959	TRUE	FALSE	Rx	124
Metoclopramide	DB01233	TRUE	FALSE	Rx	2
Metoprolol	DB00264	TRUE	FALSE	Rx	29
Mianserin	DB06148	TRUE	FALSE	Rx	1
Miconazole	DB01110	TRUE	FALSE	Rx	1
Milk thistle	DB14375	FALSE	FALSE	OTC	2
Milnacipran	DB04896	TRUE	FALSE	Rx	1
Mirabegron	DB08893	TRUE	FALSE	Rx	6
Mirtazapine	DB00370	TRUE	FALSE	Rx	12
Mitoxantrone	DB01204	TRUE	TRUE	Rx	28
Modafinil	DB00745	TRUE	FALSE	Rx	2
Mometasone	DB00764	TRUE	FALSE	Rx	1
Morphine	DB00295	TRUE	FALSE	Rx	2
Moxonidine	DB09242	TRUE	FALSE	Rx	3
Naloxone	DB01183	TRUE	FALSE	Rx or OTC	13
Naproxen	DB00788	TRUE	FALSE	Rx or OTC	3
Naratriptan	DB00952	TRUE	FALSE	OTC	1
Natalizumab	DB00108	FALSE	TRUE	Rx	46
Nebivolol	DB04861	TRUE	FALSE	Rx	6
Niacin	DB00627	TRUE	FALSE	OTC	3
Nisoldipine	DB00401	TRUE	FALSE	Rx	1
Nitrofurantoin	DB00698	TRUE	FALSE	Rx	1
Nitroglycerin	DB00727	TRUE	FALSE	Rx	1
Nitroxoline	DB01422	TRUE	FALSE	Rx	2
Norethisterone	DB00717	TRUE	FALSE	Rx	2
Norgestimate	DB00957	TRUE	FALSE	Rx	1
Ocrelizumab	DB11988	FALSE	TRUE	Rx	27
Omega-3 fatty acids	DB11133	FALSE	FALSE	Rx or OTC	23
Omega-6 fatty acids	DB13168	FALSE	FALSE	OTC	2
Omeprazole	DB00338	TRUE	FALSE	Rx or OTC	10
Ondansetron	DB00904	TRUE	FALSE	Rx	7
Opipramol	DB12930	TRUE	FALSE	Rx	6
Orthosiphon aristatus leaf	DB15838	FALSE	FALSE	OTC	1
Oxcarbazepine	DB00776	TRUE	FALSE	Rx	5
Oxybutynin	DB01062	TRUE	FALSE	Rx	8
Oxycodone	DB00497	TRUE	FALSE	Rx	4
Pantoprazole	DB00213	TRUE	FALSE	Rx or OTC	180
Pantothenic acid	DB01783	TRUE	FALSE	OTC	3
Paroxetine	DB00715	TRUE	FALSE	Rx	3
Passiflora incarnata flower	DB13974	FALSE	FALSE	OTC	1
Perindopril	DB00790	TRUE	FALSE	Rx	2
Phenoxybenzamine	DB00925	TRUE	FALSE	Rx	1
Phenprocoumon	DB00946	TRUE	FALSE	Rx	2
Picosulfuric acid	DB09268	TRUE	FALSE	OTC	2
Pipamperone	DB09286	TRUE	FALSE	Rx	2
Piperine	DB12582	TRUE	FALSE	OTC	2
Pitolisant	DB11642	TRUE	FALSE	Rx	1
Plantago seed	DB11097	FALSE	FALSE	OTC	1
Polyethylene glycol	DB09287	FALSE	FALSE	Rx or OTC	12
Potassium	DB14500	TRUE	FALSE	Rx or OTC	22
Pramipexole	DB00413	TRUE	FALSE	Rx	7
Pravastatin	DB00175	TRUE	FALSE	Rx	2
Prednisolone	DB00860	TRUE	FALSE	Rx	25
Prednisone	DB00635	TRUE	FALSE	Rx	2
Pregabalin	DB00230	TRUE	FALSE	Rx	37
Pridinol	DB13642	TRUE	FALSE	Rx	2
Primidone	DB00794	TRUE	FALSE	Rx	2
Progesterone	DB00396	TRUE	FALSE	Rx	2
Propanoic acid	DB03766	TRUE	FALSE	OTC	7
Propiverine	DB12278	TRUE	FALSE	Rx	12
Propranolol	DB00571	TRUE	FALSE	Rx	4
Pyridoxine	DB00165	TRUE	FALSE	Rx or OTC	30
Quercetin	DB04216	TRUE	FALSE	OTC	1
Quetiapine	DB01224	TRUE	FALSE	Rx	7
Quinine	DB00468	TRUE	FALSE	Rx	2
Ramipril	DB00178	TRUE	FALSE	Rx	53
Ranitidine	DB00863	TRUE	FALSE	Rx	4
Ranolazine	DB00243	TRUE	FALSE	Rx	1
Reproterol	DB12846	TRUE	FALSE	Rx	2
Riboflavin	DB00140	TRUE	FALSE	OTC	3
Risedronic acid	DB00884	TRUE	FALSE	Rx	2
Rituximab	DB00073	FALSE	FALSE	Rx	2
Rivaroxaban	DB06228	TRUE	FALSE	Rx	7
Rivastigmine	DB00989	TRUE	FALSE	Rx	1
Rizatriptan	DB00953	TRUE	FALSE	Rx	1
Rosemary	DB14272	FALSE	FALSE	OTC	1
Rosuvastatin	DB01098	TRUE	FALSE	Rx	1
Rotigotine	DB05271	TRUE	FALSE	Rx	3
Rutin	DB01698	TRUE	FALSE	OTC	1
Sacubitril	DB09292	TRUE	FALSE	Rx	1
Salbutamol	DB01001	TRUE	FALSE	Rx	2
Salmeterol	DB00938	TRUE	FALSE	Rx	2
Saw palmetto	DB14360	FALSE	FALSE	OTC	1
Saxagliptin	DB06335	TRUE	FALSE	Rx	1
Selenium	DB11135	TRUE	FALSE	OTC	6
Sertraline	DB01104	TRUE	FALSE	Rx	7
Simethicone	DB09512	TRUE	FALSE	OTC	1
Simvastatin	DB00641	TRUE	FALSE	Rx	28
Sitagliptin	DB01261	TRUE	FALSE	Rx	3
Sodium bicarbonate	DB01390	TRUE	FALSE	OTC	10
Sodium chloride	DB09153	TRUE	FALSE	Rx or OTC	11
Sodium phosphate, monobasic	DB09449	TRUE	FALSE	OTC	1
Solifenacin	DB01591	TRUE	FALSE	Rx	22
Spironolactone	DB00421	TRUE	FALSE	Rx	1
St. John's Wort	DB01323	FALSE	FALSE	OTC	2
Sulfamethoxazole	DB01015	TRUE	FALSE	Rx	1
Sulpiride	DB00391	TRUE	FALSE	Rx	1
Sumatriptan	DB00669	TRUE	FALSE	Rx	8
Tadalafil	DB00820	TRUE	FALSE	Rx	2
Tamoxifen	DB00675	TRUE	FALSE	Rx	2
Tamsulosin	DB00706	TRUE	FALSE	Rx	20
Tapentadol	DB06204	TRUE	FALSE	Rx	2
Telmisartan	DB00966	TRUE	FALSE	Rx	4
Terazosin	DB01162	TRUE	FALSE	Rx	1
Teriflunomide	DB08880	TRUE	TRUE	Rx	36
Tetrazepam	DB13324	TRUE	FALSE	Rx	1
Theophylline	DB00277	TRUE	FALSE	Rx	1
Thiamine	DB00152	TRUE	FALSE	Rx or OTC	26
Tianeptine	DB09289	TRUE	FALSE	Rx	1
Tibolone	DB09070	TRUE	FALSE	Rx	1
Ticagrelor	DB08816	TRUE	FALSE	Rx	1
Tilidine	DB13787	TRUE	FALSE	Rx or OTC	9
Timolol	DB00373	TRUE	FALSE	Rx	6
Tiotropium	DB01409	TRUE	FALSE	Rx	1
Tizanidine	DB00697	TRUE	FALSE	Rx	20
Tolperisone	DB06264	TRUE	FALSE	Rx	10
Tolterodine	DB01036	TRUE	FALSE	Rx	6
Tolvaptan	DB06212	TRUE	FALSE	Rx	1
Topiramate	DB00273	TRUE	FALSE	Rx	2
Torasemide	DB00214	TRUE	FALSE	Rx	22
Tramadol	DB00193	TRUE	FALSE	Rx	7
Travoprost	DB00287	TRUE	FALSE	Rx	3
Trazodone	DB00656	TRUE	FALSE	Rx	1
Trehalose	DB12310	TRUE	FALSE	OTC	1
Trimethoprim	DB00440	TRUE	FALSE	Rx	1
Trimipramine	DB00726	TRUE	FALSE	Rx	3
Triptorelin	DB06825	TRUE	FALSE	Rx	1
Trospium	DB00209	TRUE	FALSE	Rx	19
Ubidecarenone	DB09270	TRUE	FALSE	OTC	1
Urapidil	DB12661	TRUE	FALSE	Rx	1
Ursodeoxycholic acid	DB01586	TRUE	FALSE	Rx	1
Ustekinumab	DB05679	FALSE	FALSE	Rx	1
Valerian	DB13196	FALSE	FALSE	OTC	3
Valproic acid	DB00313	TRUE	FALSE	Rx	9
Valsartan	DB00177	TRUE	FALSE	Rx	13
Vedolizumab	DB09033	FALSE	FALSE	Rx	1
Venlafaxine	DB00285	TRUE	FALSE	Rx	9
Vilanterol	DB09082	TRUE	FALSE	Rx	1
Vitamin A	DB00162	TRUE	FALSE	OTC	2
Vitamin E	DB00163	TRUE	FALSE	OTC	5
Vitis vinifera seed	DB16606	FALSE	FALSE	OTC	3
Xipamide	DB13803	TRUE	FALSE	Rx	2
Yeast	DB11017	FALSE	FALSE	OTC	2
Zinc	DB01593	TRUE	FALSE	OTC	13
Zoledronic acid	DB00399	TRUE	FALSE	Rx	1
Zolmitriptan	DB00315	TRUE	FALSE	Rx	2
Zolpidem	DB00425	TRUE	FALSE	Rx	5
Zopiclone	DB01198	TRUE	FALSE	Rx	65

## Sheet: Legend
Drug compounds that were used by the patients with MS.
DMD = disease-modifying drug
MS = multiple sclerosis
OTC = over-the-counter
Rx = prescription
1 some drugs were used as Rx or OTC preparation, depending on the dosage
2 some patients used medications that contained two or more drug compounds as active ingredients
