# Supplementary material for: Update and Application of a Deep Learning Model for the Prediction of Interactions between Drugs Used by Patients with Multiple Sclerosis
Source: Pharmaceutics. 2023 Dec 19;16(1):3. doi: 10.3390/pharmaceutics16010003 (PMC10819178; doi:10.3390/pharmaceutics16010003)
Supplement: Supplementary file 1 [file pharmaceutics-16-00003-s001.zip › Supplemental_Table_S3.xlsx]

## Sheet: Supplemental Table 3
Drug1 DrugBank accession	Drug1 generic name	Drug2 DrugBank accession	Drug2 generic name	DDI type	Sentence	Score 1	Number of patients 2	DDI in DrugBank	Negative health effect	Alternative approved drugs for Drug1 3	Alternative approved drugs for Drug2 3
DB00014	Goserelin	DB00115	Cyanocobalamin	DDI type 15	Goserelin may decrease the excretion rate of Cyanocobalamin which could result in a higher serum level.	0.999694	0	TRUE	FALSE
DB00014	Goserelin	DB00121	Biotin	DDI type 15	Goserelin may decrease the excretion rate of Biotin which could result in a higher serum level.	0.999972	0	FALSE	FALSE
DB00014	Goserelin	DB00122	Choline	DDI type 24	Goserelin may decrease effectiveness of Choline as a diagnostic agent.	0.992208	0	FALSE	FALSE
DB00014	Goserelin	DB00125	Arginine	DDI type 26	The risk or severity of adverse effects can be increased when Goserelin is combined with Arginine.	0.985208	0	FALSE	TRUE
DB00014	Goserelin	DB00125	Arginine	DDI type 15	Goserelin may decrease the excretion rate of Arginine which could result in a higher serum level.	0.999282	0	FALSE	FALSE
DB00014	Goserelin	DB00126	Ascorbic acid	DDI type 15	Goserelin may decrease the excretion rate of Ascorbic acid which could result in a higher serum level.	0.999349	0	FALSE	FALSE
DB00014	Goserelin	DB00134	Methionine	DDI type 26	The risk or severity of adverse effects can be increased when Goserelin is combined with Methionine.	0.998361	0	FALSE	TRUE
DB00014	Goserelin	DB00138	Cystine	DDI type 15	Goserelin may decrease the excretion rate of Cystine which could result in a higher serum level.	0.999976	0	FALSE	FALSE
DB00014	Goserelin	DB00140	Riboflavin	DDI type 15	Goserelin may decrease the excretion rate of Riboflavin which could result in a higher serum level.	0.999145	0	FALSE	FALSE
DB00014	Goserelin	DB00152	Thiamine	DDI type 30	The risk or severity of hypertension can be increased when Thiamine is combined with Goserelin.	0.984235	0	FALSE	TRUE
DB00014	Goserelin	DB00152	Thiamine	DDI type 15	Goserelin may decrease the excretion rate of Thiamine which could result in a higher serum level.	0.994464	0	FALSE	FALSE
DB00014	Goserelin	DB00158	Folic acid	DDI type 15	Goserelin may decrease the excretion rate of Folic acid which could result in a higher serum level.	0.999924	0	TRUE	FALSE
DB00014	Goserelin	DB00162	Vitamin A	DDI type 15	Goserelin may decrease the excretion rate of Vitamin A which could result in a higher serum level.	0.999519	0	FALSE	FALSE
DB00014	Goserelin	DB00165	Pyridoxine	DDI type 15	Goserelin may decrease the excretion rate of Pyridoxine which could result in a higher serum level.	0.999915	0	TRUE	FALSE
DB00014	Goserelin	DB00166	Lipoic acid	DDI type 15	Goserelin may decrease the excretion rate of Lipoic acid which could result in a higher serum level.	0.999915	0	FALSE	FALSE
DB00014	Goserelin	DB00169	Cholecalciferol	DDI type 15	Goserelin may decrease the excretion rate of Cholecalciferol which could result in a higher serum level.	0.985752	0	FALSE	FALSE
DB00014	Goserelin	DB00175	Pravastatin	DDI type 15	Goserelin may decrease the excretion rate of Pravastatin which could result in a higher serum level.	0.999777	0	FALSE	FALSE
DB00014	Goserelin	DB00181	Baclofen	DDI type 15	Goserelin may decrease the excretion rate of Baclofen which could result in a higher serum level.	0.999894	0	TRUE	FALSE
DB00014	Goserelin	DB00186	Lorazepam	DDI type 15	Goserelin may decrease the excretion rate of Lorazepam which could result in a higher serum level.	0.996678	0	TRUE	FALSE
DB00014	Goserelin	DB00190	Carbidopa	DDI type 15	Goserelin may decrease the excretion rate of Carbidopa which could result in a higher serum level.	0.999818	0	TRUE	FALSE
DB00014	Goserelin	DB00193	Tramadol	DDI type 15	Goserelin may decrease the excretion rate of Tramadol which could result in a higher serum level.	0.999815	0	TRUE	FALSE
DB00014	Goserelin	DB00209	Trospium	DDI type 13	The therapeutic efficacy of Trospium can be decreased when used in combination with Goserelin.	0.981007	0	FALSE	FALSE
DB00014	Goserelin	DB00213	Pantoprazole	DDI type 15	Goserelin may decrease the excretion rate of Pantoprazole which could result in a higher serum level.	0.999919	0	TRUE	FALSE
DB00014	Goserelin	DB00214	Torasemide	DDI type 35	Goserelin may decrease the antihypertensive activities of Torasemide.	0.992961	0	FALSE	FALSE
DB00014	Goserelin	DB00215	Citalopram	DDI type 32	The risk or severity of QTc prolongation can be increased when Goserelin is combined with Citalopram.	0.996329	0	TRUE	TRUE		Fluvoxamine (DB00176; P31645), Phentermine (DB00191; P31645), Tramadol (DB00193; P31645), Venlafaxine (DB00285; P31645), Duloxetine (DB00476; P31645), Sibutramine (DB01105; P31645), Nefazodone (DB01149; P31645), Dexfenfluramine (DB01191; P31645), Milnacipran (DB04896; P31645), Desvenlafaxine (DB06700; P31645), Levomilnacipran (DB08918; P31645), Vortioxetine (DB09068; P31645)
DB00014	Goserelin	DB00222	Glimepiride	DDI type 13	The therapeutic efficacy of Glimepiride can be decreased when used in combination with Goserelin.	0.99953	0	TRUE	FALSE
DB00014	Goserelin	DB00222	Glimepiride	DDI type 15	Goserelin may decrease the excretion rate of Glimepiride which could result in a higher serum level.	0.999915	0	FALSE	FALSE
DB00014	Goserelin	DB00227	Lovastatin	DDI type 15	Goserelin may decrease the excretion rate of Lovastatin which could result in a higher serum level.	0.974466	0	FALSE	FALSE
DB00014	Goserelin	DB00242	Cladribine	DDI type 15	Goserelin may decrease the excretion rate of Cladribine which could result in a higher serum level.	0.999929	0	FALSE	FALSE
DB00014	Goserelin	DB00243	Ranolazine	DDI type 32	The risk or severity of QTc prolongation can be increased when Goserelin is combined with Ranolazine.	0.994121	0	TRUE	TRUE
DB00014	Goserelin	DB00254	Doxycycline	DDI type 15	Goserelin may decrease the excretion rate of Doxycycline which could result in a higher serum level.	0.999896	0	TRUE	FALSE
DB00014	Goserelin	DB00264	Metoprolol	DDI type 32	The risk or severity of QTc prolongation can be increased when Goserelin is combined with Metoprolol.	0.972477	0	FALSE	TRUE		Labetalol (DB00598; P08588), Bisoprolol (DB00612; P08588)
DB00014	Goserelin	DB00273	Topiramate	DDI type 15	Goserelin may decrease the excretion rate of Topiramate which could result in a higher serum level.	0.999983	0	TRUE	FALSE
DB00014	Goserelin	DB00277	Theophylline	DDI type 6	The metabolism of Theophylline can be decreased when combined with Goserelin.	0.989346	0	FALSE	FALSE
DB00014	Goserelin	DB00279	Liothyronine	DDI type 15	Goserelin may decrease the excretion rate of Liothyronine which could result in a higher serum level.	0.999542	0	TRUE	FALSE
DB00014	Goserelin	DB00281	Lidocaine	DDI type 15	Goserelin may decrease the excretion rate of Lidocaine which could result in a higher serum level.	0.997652	0	FALSE	FALSE
DB00014	Goserelin	DB00285	Venlafaxine	DDI type 15	Goserelin may decrease the excretion rate of Venlafaxine which could result in a higher serum level.	0.99979	0	TRUE	FALSE
DB00014	Goserelin	DB00287	Travoprost	DDI type 13	The therapeutic efficacy of Travoprost can be decreased when used in combination with Goserelin.	0.996222	0	FALSE	FALSE
DB00014	Goserelin	DB00294	Etonogestrel	DDI type 15	Goserelin may decrease the excretion rate of Etonogestrel which could result in a higher serum level.	0.999409	0	TRUE	FALSE
DB00014	Goserelin	DB00295	Morphine	DDI type 10	The serum concentration of Morphine can be increased when it is combined with Goserelin.	0.997948	0	FALSE	FALSE
DB00014	Goserelin	DB00304	Desogestrel	DDI type 6	The metabolism of Desogestrel can be decreased when combined with Goserelin.	0.951416	0	FALSE	FALSE
DB00014	Goserelin	DB00313	Valproic acid	DDI type 32	The risk or severity of QTc prolongation can be increased when Goserelin is combined with Valproic acid.	0.997258	0	TRUE	TRUE
DB00014	Goserelin	DB00315	Zolmitriptan	DDI type 15	Goserelin may decrease the excretion rate of Zolmitriptan which could result in a higher serum level.	0.998557	0	FALSE	FALSE
DB00014	Goserelin	DB00316	Acetaminophen	DDI type 15	Goserelin may decrease the excretion rate of Acetaminophen which could result in a higher serum level.	0.999873	0	TRUE	FALSE
DB00014	Goserelin	DB00318	Codeine	DDI type 32	The risk or severity of QTc prolongation can be increased when Goserelin is combined with Codeine.	0.993905	0	FALSE	TRUE		Morphine (DB00295; P35372|P41145|P41143)
DB00014	Goserelin	DB00321	Amitriptyline	DDI type 32	The risk or severity of QTc prolongation can be increased when Goserelin is combined with Amitriptyline.	0.998865	0	TRUE	TRUE		Nefazodone (DB01149; P23975|P31645|P28223)
DB00014	Goserelin	DB00327	Hydromorphone	DDI type 15	Goserelin may decrease the excretion rate of Hydromorphone which could result in a higher serum level.	0.98245	0	TRUE	FALSE
DB00014	Goserelin	DB00331	Metformin	DDI type 13	The therapeutic efficacy of Metformin can be decreased when used in combination with Goserelin.	0.998599	0	TRUE	FALSE
DB00014	Goserelin	DB00331	Metformin	DDI type 15	Goserelin may decrease the excretion rate of Metformin which could result in a higher serum level.	0.999537	0	FALSE	FALSE
DB00014	Goserelin	DB00338	Omeprazole	DDI type 15	Goserelin may decrease the excretion rate of Omeprazole which could result in a higher serum level.	0.998171	0	FALSE	FALSE
DB00014	Goserelin	DB00341	Cetirizine	DDI type 32	The risk or severity of QTc prolongation can be increased when Goserelin is combined with Cetirizine.	0.998265	0	FALSE	TRUE		Olopatadine (DB00768; P35367), Repaglinide (DB00912; P35367), Butriptyline (DB09016; P35367), Lorpiprazole (DB09195; P35367)
DB00014	Goserelin	DB00363	Clozapine	DDI type 32	The risk or severity of QTc prolongation can be increased when Goserelin is combined with Clozapine.	0.997544	0	TRUE	TRUE
DB00014	Goserelin	DB00370	Mirtazapine	DDI type 30	The risk or severity of hypertension can be increased when Mirtazapine is combined with Goserelin.	0.999506	0	FALSE	TRUE
DB00014	Goserelin	DB00373	Timolol	DDI type 13	The therapeutic efficacy of Timolol can be decreased when used in combination with Goserelin.	0.98972	0	FALSE	FALSE
DB00014	Goserelin	DB00378	Dydrogesterone	DDI type 15	Goserelin may decrease the excretion rate of Dydrogesterone which could result in a higher serum level.	0.997598	0	FALSE	FALSE
DB00014	Goserelin	DB00381	Amlodipine	DDI type 32	The risk or severity of QTc prolongation can be increased when Goserelin is combined with Amlodipine.	0.999201	0	FALSE	TRUE
DB00014	Goserelin	DB00396	Progesterone	DDI type 15	Goserelin may decrease the excretion rate of Progesterone which could result in a higher serum level.	0.989416	0	FALSE	FALSE
DB00014	Goserelin	DB00399	Zoledronic acid	DDI type 63	Goserelin may increase the hypocalcemic activities of Zoledronic acid.	0.995652	0	FALSE	FALSE
DB00014	Goserelin	DB00401	Nisoldipine	DDI type 32	The risk or severity of QTc prolongation can be increased when Goserelin is combined with Nisoldipine.	0.998621	0	FALSE	TRUE
DB00014	Goserelin	DB00413	Pramipexole	DDI type 15	Goserelin may decrease the excretion rate of Pramipexole which could result in a higher serum level.	0.999074	0	TRUE	FALSE
DB00014	Goserelin	DB00421	Spironolactone	DDI type 15	Goserelin may decrease the excretion rate of Spironolactone which could result in a higher serum level.	0.994262	0	FALSE	FALSE
DB00014	Goserelin	DB00425	Zolpidem	DDI type 6	The metabolism of Zolpidem can be decreased when combined with Goserelin.	0.999677	0	FALSE	FALSE
DB00014	Goserelin	DB00437	Allopurinol	DDI type 15	Goserelin may decrease the excretion rate of Allopurinol which could result in a higher serum level.	0.999958	0	TRUE	FALSE
DB00014	Goserelin	DB00443	Betamethasone	DDI type 15	Goserelin may decrease the excretion rate of Betamethasone which could result in a higher serum level.	0.998001	0	FALSE	FALSE
DB00014	Goserelin	DB00451	Levothyroxine	DDI type 15	Goserelin may decrease the excretion rate of Levothyroxine which could result in a higher serum level.	0.998962	0	FALSE	FALSE
DB00014	Goserelin	DB00455	Loratadine	DDI type 15	Goserelin may decrease the excretion rate of Loratadine which could result in a higher serum level.	0.984422	0	FALSE	FALSE
DB00014	Goserelin	DB00470	Dronabinol	DDI type 10	The serum concentration of Dronabinol can be increased when it is combined with Goserelin.	0.999137	0	FALSE	FALSE
DB00014	Goserelin	DB00476	Duloxetine	DDI type 15	Goserelin may decrease the excretion rate of Duloxetine which could result in a higher serum level.	0.999383	0	TRUE	FALSE
DB00014	Goserelin	DB00496	Darifenacin	DDI type 32	The risk or severity of QTc prolongation can be increased when Goserelin is combined with Darifenacin.	0.998338	0	FALSE	TRUE		Anisotropine methylbromide (DB00517; P20309), Tiotropium (DB01409; P20309), Mepenzolate (DB04843; P20309), Fesoterodine (DB06702; P20309), Aclidinium (DB08897; P20309)
DB00014	Goserelin	DB00537	Ciprofloxacin	DDI type 32	The risk or severity of QTc prolongation can be increased when Goserelin is combined with Ciprofloxacin.	0.996046	0	TRUE	TRUE
DB00014	Goserelin	DB00564	Carbamazepine	DDI type 15	Goserelin may decrease the excretion rate of Carbamazepine which could result in a higher serum level.	0.999492	0	TRUE	FALSE
DB00014	Goserelin	DB00568	Cinnarizine	DDI type 32	The risk or severity of QTc prolongation can be increased when Goserelin is combined with Cinnarizine.	0.999593	0	TRUE	TRUE
DB00014	Goserelin	DB00571	Propranolol	DDI type 15	Goserelin may decrease the excretion rate of Propranolol which could result in a higher serum level.	0.940116	0	TRUE	FALSE
DB00014	Goserelin	DB00581	Lactulose	DDI type 13	The therapeutic efficacy of Lactulose can be decreased when used in combination with Goserelin.	0.99985	0	FALSE	FALSE
DB00014	Goserelin	DB00583	Levocarnitine	DDI type 15	Goserelin may decrease the excretion rate of Levocarnitine which could result in a higher serum level.	0.995643	0	TRUE	FALSE
DB00014	Goserelin	DB00584	Enalapril	DDI type 15	Goserelin may decrease the excretion rate of Enalapril which could result in a higher serum level.	0.965991	0	FALSE	FALSE
DB00014	Goserelin	DB00588	Fluticasone propionate	DDI type 26	The risk or severity of adverse effects can be increased when Goserelin is combined with Fluticasone propionate.	0.997853	0	FALSE	TRUE		Flunisolide (DB00180; P04150), Amcinonide (DB00288; P04150), Fluorometholone (DB00324; P04150), Hydrocortisone (DB00741; P04150), Hydrocortamate (DB00769; P04150), Flurandrenolide (DB00846; P04150), Loteprednol etabonate (DB14596; P04150), Methylprednisolone (DB00959; P04150), Prednicarbate (DB01130; P04150), Budesonide (DB01222; P04150), Desonide (DB01260; P04150), Cortisone acetate (DB01380; P0…
DB00014	Goserelin	DB00588	Fluticasone propionate	DDI type 15	Goserelin may decrease the excretion rate of Fluticasone propionate which could result in a higher serum level.	0.998792	0	FALSE	FALSE
DB00014	Goserelin	DB00590	Doxazosin	DDI type 32	The risk or severity of QTc prolongation can be increased when Goserelin is combined with Doxazosin.	0.984063	0	FALSE	TRUE
DB00014	Goserelin	DB00594	Amiloride	DDI type 15	Goserelin may decrease the excretion rate of Amiloride which could result in a higher serum level.	0.984317	0	FALSE	FALSE
DB00014	Goserelin	DB00603	Medroxyprogesterone acetate	DDI type 15	Goserelin may decrease the excretion rate of Medroxyprogesterone acetate which could result in a higher serum level.	0.999867	0	TRUE	FALSE
DB00014	Goserelin	DB00627	Niacin	DDI type 13	The therapeutic efficacy of Niacin can be decreased when used in combination with Goserelin.	0.994209	0	FALSE	FALSE
DB00014	Goserelin	DB00627	Niacin	DDI type 15	Goserelin may decrease the excretion rate of Niacin which could result in a higher serum level.	0.986733	0	FALSE	FALSE
DB00014	Goserelin	DB00635	Prednisone	DDI type 15	Goserelin may decrease the excretion rate of Prednisone which could result in a higher serum level.	0.999931	0	TRUE	FALSE
DB00014	Goserelin	DB00641	Simvastatin	DDI type 15	Goserelin may decrease the excretion rate of Simvastatin which could result in a higher serum level.	0.99492	0	FALSE	FALSE
DB00014	Goserelin	DB00654	Latanoprost	DDI type 13	The therapeutic efficacy of Latanoprost can be decreased when used in combination with Goserelin.	0.989419	0	FALSE	FALSE
DB00014	Goserelin	DB00656	Trazodone	DDI type 32	The risk or severity of QTc prolongation can be increased when Goserelin is combined with Trazodone.	0.998579	0	FALSE	TRUE
DB00014	Goserelin	DB00669	Sumatriptan	DDI type 15	Goserelin may decrease the excretion rate of Sumatriptan which could result in a higher serum level.	0.999936	0	TRUE	FALSE
DB00014	Goserelin	DB00687	Fludrocortisone	DDI type 15	Goserelin may decrease the excretion rate of Fludrocortisone which could result in a higher serum level.	0.999534	0	FALSE	FALSE
DB00014	Goserelin	DB00698	Nitrofurantoin	DDI type 15	Goserelin may decrease the excretion rate of Nitrofurantoin which could result in a higher serum level.	0.995242	0	TRUE	FALSE
DB00014	Goserelin	DB00700	Eplerenone	DDI type 35	Goserelin may decrease the antihypertensive activities of Eplerenone.	0.969187	0	FALSE	FALSE
DB00014	Goserelin	DB00706	Tamsulosin	DDI type 15	Goserelin may decrease the excretion rate of Tamsulosin which could result in a higher serum level.	0.999859	0	TRUE	FALSE
DB00014	Goserelin	DB00710	Ibandronate	DDI type 32	The risk or severity of QTc prolongation can be increased when Goserelin is combined with Ibandronate.	0.994568	0	FALSE	TRUE
DB00014	Goserelin	DB00715	Paroxetine	DDI type 32	The risk or severity of QTc prolongation can be increased when Goserelin is combined with Paroxetine.	0.983651	0	FALSE	TRUE		Fluvoxamine (DB00176; P31645), Phentermine (DB00191; P31645), Tramadol (DB00193; P31645), Venlafaxine (DB00285; P31645), Duloxetine (DB00476; P31645), Sibutramine (DB01105; P31645), Nefazodone (DB01149; P31645), Dexfenfluramine (DB01191; P31645), Milnacipran (DB04896; P31645), Desvenlafaxine (DB06700; P31645), Levomilnacipran (DB08918; P31645), Vortioxetine (DB09068; P31645)
DB00014	Goserelin	DB00722	Lisinopril	DDI type 15	Goserelin may decrease the excretion rate of Lisinopril which could result in a higher serum level.	0.999607	0	TRUE	FALSE
DB00014	Goserelin	DB00726	Trimipramine	DDI type 32	The risk or severity of QTc prolongation can be increased when Goserelin is combined with Trimipramine.	0.994022	0	FALSE	TRUE		Phentermine (DB00191; P31645|P23975), Tramadol (DB00193; P31645|P23975), Venlafaxine (DB00285; P31645|P23975), Duloxetine (DB00476; P31645|P23975), Sibutramine (DB01105; P31645|P23975), Nefazodone (DB01149; P31645|P23975), Milnacipran (DB04896; P31645|P23975), Desvenlafaxine (DB06700; P31645|P23975), Levomilnacipran (DB08918; P31645|P23975)
DB00014	Goserelin	DB00727	Nitroglycerin	DDI type 35	Goserelin may decrease the antihypertensive activities of Nitroglycerin.	0.998975	0	FALSE	FALSE
DB00014	Goserelin	DB00736	Esomeprazole	DDI type 15	Goserelin may decrease the excretion rate of Esomeprazole which could result in a higher serum level.	0.998716	0	FALSE	FALSE
DB00014	Goserelin	DB00741	Hydrocortisone	DDI type 15	Goserelin may decrease the excretion rate of Hydrocortisone which could result in a higher serum level.	0.999748	0	FALSE	FALSE
DB00014	Goserelin	DB00763	Methimazole	DDI type 15	Goserelin may decrease the excretion rate of Methimazole which could result in a higher serum level.	0.999983	0	TRUE	FALSE
DB00014	Goserelin	DB00764	Mometasone	DDI type 26	The risk or severity of adverse effects can be increased when Goserelin is combined with Mometasone.	0.995096	0	FALSE	TRUE
DB00014	Goserelin	DB00764	Mometasone	DDI type 15	Goserelin may decrease the excretion rate of Mometasone which could result in a higher serum level.	0.999406	0	FALSE	FALSE
DB00014	Goserelin	DB00783	Estradiol	DDI type 15	Goserelin may decrease the excretion rate of Estradiol which could result in a higher serum level.	0.999427	0	TRUE	FALSE
DB00014	Goserelin	DB00787	Acyclovir	DDI type 15	Goserelin may decrease the excretion rate of Acyclovir which could result in a higher serum level.	0.998444	0	FALSE	FALSE
DB00014	Goserelin	DB00788	Naproxen	DDI type 15	Goserelin may decrease the excretion rate of Naproxen which could result in a higher serum level.	0.995279	0	FALSE	FALSE
DB00014	Goserelin	DB00790	Perindopril	DDI type 15	Goserelin may decrease the excretion rate of Perindopril which could result in a higher serum level.	0.999651	0	TRUE	FALSE
DB00014	Goserelin	DB00813	Fentanyl	DDI type 30	The risk or severity of hypertension can be increased when Fentanyl is combined with Goserelin.	0.983651	0	FALSE	TRUE		Opium (DB11130; P35372|P41143)
DB00014	Goserelin	DB00820	Tadalafil	DDI type 32	The risk or severity of QTc prolongation can be increased when Goserelin is combined with Tadalafil.	0.959899	0	FALSE	TRUE		Theophylline (DB00277; O76074)
DB00014	Goserelin	DB00820	Tadalafil	DDI type 15	Goserelin may decrease the excretion rate of Tadalafil which could result in a higher serum level.	0.995578	0	TRUE	FALSE
DB00014	Goserelin	DB00829	Diazepam	DDI type 15	Goserelin may decrease the excretion rate of Diazepam which could result in a higher serum level.	0.999955	0	TRUE	FALSE
DB00014	Goserelin	DB00860	Prednisolone	DDI type 15	Goserelin may decrease the excretion rate of Prednisolone which could result in a higher serum level.	0.998449	0	FALSE	FALSE
DB00014	Goserelin	DB00863	Ranitidine	DDI type 15	Goserelin may decrease the excretion rate of Ranitidine which could result in a higher serum level.	0.999884	0	TRUE	FALSE
DB00014	Goserelin	DB00869	Dorzolamide	DDI type 15	Goserelin may decrease the excretion rate of Dorzolamide which could result in a higher serum level.	0.968764	0	FALSE	FALSE
DB00014	Goserelin	DB00876	Eprosartan	DDI type 35	Goserelin may decrease the antihypertensive activities of Eprosartan.	0.94665	0	FALSE	FALSE
DB00014	Goserelin	DB00884	Risedronic acid	DDI type 63	Goserelin may increase the hypocalcemic activities of Risedronic acid.	0.990531	0	FALSE	FALSE
DB00014	Goserelin	DB00904	Ondansetron	DDI type 32	The risk or severity of QTc prolongation can be increased when Goserelin is combined with Ondansetron.	0.999725	0	TRUE	TRUE		Palonosetron (DB00377; P46098), Vortioxetine (DB09068; P46098)
DB00014	Goserelin	DB00905	Bimatoprost	DDI type 13	The therapeutic efficacy of Bimatoprost can be decreased when used in combination with Goserelin.	0.984874	0	FALSE	FALSE
DB00014	Goserelin	DB00925	Phenoxybenzamine	DDI type 13	The therapeutic efficacy of Phenoxybenzamine can be decreased when used in combination with Goserelin.	0.962642	0	FALSE	FALSE
DB00014	Goserelin	DB00946	Phenprocoumon	DDI type 27	The risk or severity of bleeding can be increased when Goserelin is combined with Phenprocoumon.	0.996064	0	FALSE	TRUE
DB00014	Goserelin	DB00950	Fexofenadine	DDI type 10	The serum concentration of Fexofenadine can be increased when it is combined with Goserelin.	0.96808	0	FALSE	FALSE
DB00014	Goserelin	DB00951	Isoniazid	DDI type 15	Goserelin may decrease the excretion rate of Isoniazid which could result in a higher serum level.	0.999914	0	TRUE	FALSE
DB00014	Goserelin	DB00952	Naratriptan	DDI type 30	The risk or severity of hypertension can be increased when Naratriptan is combined with Goserelin.	0.990803	0	FALSE	TRUE		Sumatriptan (DB00669; P08908|P28221|P28222|P30939)
DB00014	Goserelin	DB00952	Naratriptan	DDI type 15	Goserelin may decrease the excretion rate of Naratriptan which could result in a higher serum level.	0.999556	0	FALSE	FALSE
DB00014	Goserelin	DB00953	Rizatriptan	DDI type 15	Goserelin may decrease the excretion rate of Rizatriptan which could result in a higher serum level.	0.99989	0	TRUE	FALSE
DB00014	Goserelin	DB00957	Norgestimate	DDI type 15	Goserelin may decrease the excretion rate of Norgestimate which could result in a higher serum level.	0.996325	0	FALSE	FALSE
DB00014	Goserelin	DB00959	Methylprednisolone	DDI type 15	Goserelin may decrease the excretion rate of Methylprednisolone which could result in a higher serum level.	0.9959	0	FALSE	FALSE
DB00014	Goserelin	DB00967	Desloratadine	DDI type 32	The risk or severity of QTc prolongation can be increased when Goserelin is combined with Desloratadine.	0.998505	0	TRUE	TRUE		Olopatadine (DB00768; P35367), Repaglinide (DB00912; P35367), Butriptyline (DB09016; P35367), Lorpiprazole (DB09195; P35367)
DB00014	Goserelin	DB00973	Ezetimibe	DDI type 15	Goserelin may decrease the excretion rate of Ezetimibe which could result in a higher serum level.	0.999688	0	FALSE	FALSE
DB00014	Goserelin	DB00977	Ethinylestradiol	DDI type 15	Goserelin may decrease the excretion rate of Ethinylestradiol which could result in a higher serum level.	0.99939	0	FALSE	FALSE
DB00014	Goserelin	DB00979	Cyclopentolate	DDI type 15	Goserelin may decrease the excretion rate of Cyclopentolate which could result in a higher serum level.	0.999428	0	FALSE	FALSE
DB00014	Goserelin	DB00983	Formoterol	DDI type 32	The risk or severity of QTc prolongation can be increased when Goserelin is combined with Formoterol.	0.96157	0	FALSE	TRUE		Droxidopa (DB06262; P07550), Protokylol (DB06814; P07550), Racepinephrine (DB11124; P07550)
DB00014	Goserelin	DB00985	Dimenhydrinate	DDI type 32	The risk or severity of QTc prolongation can be increased when Goserelin is combined with Dimenhydrinate.	0.99812	0	TRUE	TRUE		Olopatadine (DB00768; P35367), Repaglinide (DB00912; P35367), Butriptyline (DB09016; P35367), Lorpiprazole (DB09195; P35367)
DB00014	Goserelin	DB00989	Rivastigmine	DDI type 15	Goserelin may decrease the excretion rate of Rivastigmine which could result in a higher serum level.	0.999464	0	FALSE	FALSE
DB00014	Goserelin	DB00993	Azathioprine	DDI type 15	Goserelin may decrease the excretion rate of Azathioprine which could result in a higher serum level.	0.999978	0	TRUE	FALSE
DB00014	Goserelin	DB00996	Gabapentin	DDI type 15	Goserelin may decrease the excretion rate of Gabapentin which could result in a higher serum level.	0.999727	0	FALSE	FALSE
DB00014	Goserelin	DB01001	Salbutamol	DDI type 32	The risk or severity of QTc prolongation can be increased when Goserelin is combined with Salbutamol.	0.979363	0	FALSE	TRUE		Droxidopa (DB06262; P07550), Protokylol (DB06814; P07550), Racepinephrine (DB11124; P07550)
DB00014	Goserelin	DB01003	Cromoglicic acid	DDI type 15	Goserelin may decrease the excretion rate of Cromoglicic acid which could result in a higher serum level.	0.999489	0	FALSE	FALSE
DB00014	Goserelin	DB01015	Sulfamethoxazole	DDI type 13	The therapeutic efficacy of Sulfamethoxazole can be decreased when used in combination with Goserelin.	0.996203	0	TRUE	FALSE
DB00014	Goserelin	DB01019	Bethanechol	DDI type 13	The therapeutic efficacy of Bethanechol can be decreased when used in combination with Goserelin.	0.990093	0	FALSE	FALSE
DB00014	Goserelin	DB01019	Bethanechol	DDI type 15	Goserelin may decrease the excretion rate of Bethanechol which could result in a higher serum level.	0.997946	0	FALSE	FALSE
DB00014	Goserelin	DB01039	Fenofibrate	DDI type 15	Goserelin may decrease the excretion rate of Fenofibrate which could result in a higher serum level.	0.997559	0	TRUE	FALSE
DB00014	Goserelin	DB01043	Memantine	DDI type 15	Goserelin may decrease the excretion rate of Memantine which could result in a higher serum level.	0.99887	0	TRUE	FALSE
DB00014	Goserelin	DB01065	Melatonin	DDI type 15	Goserelin may decrease the excretion rate of Melatonin which could result in a higher serum level.	0.999033	0	FALSE	FALSE
DB00014	Goserelin	DB01068	Clonazepam	DDI type 15	Goserelin may decrease the excretion rate of Clonazepam which could result in a higher serum level.	0.999864	0	TRUE	FALSE
DB00014	Goserelin	DB01075	Diphenhydramine	DDI type 32	The risk or severity of QTc prolongation can be increased when Goserelin is combined with Diphenhydramine.	0.998754	0	FALSE	TRUE		Olopatadine (DB00768; P35367), Repaglinide (DB00912; P35367), Butriptyline (DB09016; P35367), Lorpiprazole (DB09195; P35367)
DB00014	Goserelin	DB01076	Atorvastatin	DDI type 15	Goserelin may decrease the excretion rate of Atorvastatin which could result in a higher serum level.	0.976072	0	FALSE	FALSE
DB00014	Goserelin	DB01086	Benzocaine	DDI type 6	The metabolism of Benzocaine can be decreased when combined with Goserelin.	0.940819	0	FALSE	FALSE
DB00014	Goserelin	DB01097	Leflunomide	DDI type 15	Goserelin may decrease the excretion rate of Leflunomide which could result in a higher serum level.	0.99962	0	FALSE	FALSE
DB00014	Goserelin	DB01104	Sertraline	DDI type 32	The risk or severity of QTc prolongation can be increased when Goserelin is combined with Sertraline.	0.991038	0	FALSE	TRUE
DB00014	Goserelin	DB01112	Cefuroxime	DDI type 15	Goserelin may decrease the excretion rate of Cefuroxime which could result in a higher serum level.	0.997459	0	FALSE	FALSE
DB00014	Goserelin	DB01114	Chlorpheniramine	DDI type 32	The risk or severity of QTc prolongation can be increased when Goserelin is combined with Chlorpheniramine.	0.999486	0	TRUE	TRUE		Olopatadine (DB00768; P35367), Repaglinide (DB00912; P35367), Butriptyline (DB09016; P35367), Lorpiprazole (DB09195; P35367)
DB00014	Goserelin	DB01136	Carvedilol	DDI type 32	The risk or severity of QTc prolongation can be increased when Goserelin is combined with Carvedilol.	0.99961	0	FALSE	TRUE
DB00014	Goserelin	DB01137	Levofloxacin	DDI type 32	The risk or severity of QTc prolongation can be increased when Goserelin is combined with Levofloxacin.	0.998932	0	TRUE	TRUE
DB00014	Goserelin	DB01142	Doxepin	DDI type 32	The risk or severity of QTc prolongation can be increased when Goserelin is combined with Doxepin.	0.991363	0	FALSE	TRUE
DB00014	Goserelin	DB01156	Bupropion	DDI type 15	Goserelin may decrease the excretion rate of Bupropion which could result in a higher serum level.	0.99885	0	TRUE	FALSE
DB00014	Goserelin	DB01162	Terazosin	DDI type 13	The therapeutic efficacy of Terazosin can be decreased when used in combination with Goserelin.	0.997136	0	FALSE	FALSE
DB00014	Goserelin	DB01175	Escitalopram	DDI type 32	The risk or severity of QTc prolongation can be increased when Goserelin is combined with Escitalopram.	0.996329	0	TRUE	TRUE		Fluvoxamine (DB00176; P31645), Phentermine (DB00191; P31645), Tramadol (DB00193; P31645), Venlafaxine (DB00285; P31645), Duloxetine (DB00476; P31645), Sibutramine (DB01105; P31645), Nefazodone (DB01149; P31645), Dexfenfluramine (DB01191; P31645), Milnacipran (DB04896; P31645), Desvenlafaxine (DB06700; P31645), Levomilnacipran (DB08918; P31645), Vortioxetine (DB09068; P31645)
DB00014	Goserelin	DB01183	Naloxone	DDI type 15	Goserelin may decrease the excretion rate of Naloxone which could result in a higher serum level.	0.999945	0	TRUE	FALSE
DB00014	Goserelin	DB01195	Flecainide	DDI type 32	The risk or severity of QTc prolongation can be increased when Goserelin is combined with Flecainide.	0.999203	0	TRUE	TRUE
DB00014	Goserelin	DB01197	Captopril	DDI type 30	The risk or severity of hypertension can be increased when Captopril is combined with Goserelin.	0.991199	0	FALSE	TRUE		Ramipril (DB00178; P12821), Fosinopril (DB00492; P12821), Enalapril (DB00584; P12821), Lisinopril (DB00722; P12821), Perindopril (DB00790; P12821), Rescinnamine (DB01180; P12821), Cilazapril (DB01340; P12821), Spirapril (DB01348; P12821), Enalaprilat (DB09477; P12821), Zofenopril (DB13166; P12821)
DB00014	Goserelin	DB01198	Zopiclone	DDI type 15	Goserelin may decrease the excretion rate of Zopiclone which could result in a higher serum level.	0.999387	0	FALSE	FALSE
DB00014	Goserelin	DB01202	Levetiracetam	DDI type 13	The therapeutic efficacy of Levetiracetam can be decreased when used in combination with Goserelin.	0.992625	0	FALSE	FALSE
DB00014	Goserelin	DB01202	Levetiracetam	DDI type 15	Goserelin may decrease the excretion rate of Levetiracetam which could result in a higher serum level.	0.997906	0	FALSE	FALSE
DB00014	Goserelin	DB01204	Mitoxantrone	DDI type 15	Goserelin may decrease the excretion rate of Mitoxantrone which could result in a higher serum level.	0.999522	0	FALSE	FALSE
DB00014	Goserelin	DB01216	Finasteride	DDI type 30	The risk or severity of hypertension can be increased when Finasteride is combined with Goserelin.	0.989876	1	FALSE	TRUE		Azelaic acid (DB00548; P31213)
DB00014	Goserelin	DB01216	Finasteride	DDI type 15	Goserelin may decrease the excretion rate of Finasteride which could result in a higher serum level.	0.998586	1	FALSE	FALSE
DB00014	Goserelin	DB01222	Budesonide	DDI type 15	Goserelin may decrease the excretion rate of Budesonide which could result in a higher serum level.	0.999379	0	TRUE	FALSE
DB00014	Goserelin	DB01224	Quetiapine	DDI type 32	The risk or severity of QTc prolongation can be increased when Goserelin is combined with Quetiapine.	0.999047	0	TRUE	TRUE
DB00014	Goserelin	DB01233	Metoclopramide	DDI type 13	The therapeutic efficacy of Metoclopramide can be decreased when used in combination with Goserelin.	0.969756	0	FALSE	FALSE
DB00014	Goserelin	DB01234	Dexamethasone	DDI type 15	Goserelin may decrease the excretion rate of Dexamethasone which could result in a higher serum level.	0.998001	0	FALSE	FALSE
DB00014	Goserelin	DB01235	Levodopa	DDI type 15	Goserelin may decrease the excretion rate of Levodopa which could result in a higher serum level.	0.964087	0	FALSE	FALSE
DB00014	Goserelin	DB01261	Sitagliptin	DDI type 13	The therapeutic efficacy of Sitagliptin can be decreased when used in combination with Goserelin.	0.997859	0	TRUE	FALSE
DB00014	Goserelin	DB01261	Sitagliptin	DDI type 15	Goserelin may decrease the excretion rate of Sitagliptin which could result in a higher serum level.	0.999287	0	FALSE	FALSE
DB00014	Goserelin	DB01288	Fenoterol	DDI type 13	The therapeutic efficacy of Fenoterol can be decreased when used in combination with Goserelin.	0.988873	0	FALSE	FALSE
DB00014	Goserelin	DB01373	Calcium	DDI type 32	The risk or severity of QTc prolongation can be increased when Goserelin is combined with Calcium.	0.977383	0	FALSE	TRUE
DB00014	Goserelin	DB01373	Calcium	DDI type 15	Goserelin may decrease the excretion rate of Calcium which could result in a higher serum level.	0.941311	0	FALSE	FALSE
DB00014	Goserelin	DB01390	Sodium bicarbonate	DDI type 15	Goserelin may decrease the excretion rate of Sodium bicarbonate which could result in a higher serum level.	0.999962	0	FALSE	FALSE
DB00014	Goserelin	DB01409	Tiotropium	DDI type 15	Goserelin may decrease the excretion rate of Tiotropium which could result in a higher serum level.	0.999478	0	TRUE	FALSE
DB00014	Goserelin	DB01416	Cefpodoxime	DDI type 15	Goserelin may decrease the excretion rate of Cefpodoxime which could result in a higher serum level.	0.999778	0	FALSE	FALSE
DB00014	Goserelin	DB01422	Nitroxoline	DDI type 15	Goserelin may decrease the excretion rate of Nitroxoline which could result in a higher serum level.	0.999857	0	FALSE	FALSE
DB00014	Goserelin	DB01436	Alfacalcidol	DDI type 15	Goserelin may decrease the excretion rate of Alfacalcidol which could result in a higher serum level.	0.985517	0	FALSE	FALSE
DB00014	Goserelin	DB01586	Ursodeoxycholic acid	DDI type 15	Goserelin may decrease the excretion rate of Ursodeoxycholic acid which could result in a higher serum level.	0.998517	0	FALSE	FALSE
DB00014	Goserelin	DB01592	Iron	DDI type 32	The risk or severity of QTc prolongation can be increased when Goserelin is combined with Iron.	0.981204	0	FALSE	TRUE
DB00014	Goserelin	DB01593	Zinc	DDI type 32	The risk or severity of QTc prolongation can be increased when Goserelin is combined with Zinc.	0.981204	0	FALSE	TRUE
DB00014	Goserelin	DB01611	Hydroxychloroquine	DDI type 32	The risk or severity of QTc prolongation can be increased when Goserelin is combined with Hydroxychloroquine.	0.9781	0	FALSE	TRUE
DB00014	Goserelin	DB01698	Rutin	DDI type 15	Goserelin may decrease the excretion rate of Rutin which could result in a higher serum level.	0.998786	0	FALSE	FALSE
DB00014	Goserelin	DB01783	Pantothenic acid	DDI type 15	Goserelin may decrease the excretion rate of Pantothenic acid which could result in a higher serum level.	0.999978	0	FALSE	FALSE
DB00014	Goserelin	DB03766	Propanoic acid	DDI type 15	Goserelin may decrease the excretion rate of Propanoic acid which could result in a higher serum level.	0.999833	0	FALSE	FALSE
DB00014	Goserelin	DB04398	Lactic acid	DDI type 15	Goserelin may decrease the excretion rate of Lactic acid which could result in a higher serum level.	0.999362	0	FALSE	FALSE
DB00014	Goserelin	DB04573	Estriol	DDI type 13	The therapeutic efficacy of Estriol can be decreased when used in combination with Goserelin.	0.988532	0	FALSE	FALSE
DB00014	Goserelin	DB04573	Estriol	DDI type 15	Goserelin may decrease the excretion rate of Estriol which could result in a higher serum level.	0.999576	0	FALSE	FALSE
DB00014	Goserelin	DB04703	Hesperidin	DDI type 15	Goserelin may decrease the excretion rate of Hesperidin which could result in a higher serum level.	0.989558	0	FALSE	FALSE
DB00014	Goserelin	DB04861	Nebivolol	DDI type 13	The therapeutic efficacy of Nebivolol can be decreased when used in combination with Goserelin.	0.952937	0	FALSE	FALSE
DB00014	Goserelin	DB04896	Milnacipran	DDI type 15	Goserelin may decrease the excretion rate of Milnacipran which could result in a higher serum level.	0.995193	0	TRUE	FALSE
DB00014	Goserelin	DB05271	Rotigotine	DDI type 30	The risk or severity of hypertension can be increased when Rotigotine is combined with Goserelin.	0.993555	0	FALSE	TRUE		Pramipexole (DB00413; P35462|P21917|P14416), Dopamine (DB00988; P35462|P21917|P14416), Levodopa (DB01235; P35462|P21917|P14416)
DB00014	Goserelin	DB05541	Brivaracetam	DDI type 15	Goserelin may decrease the excretion rate of Brivaracetam which could result in a higher serum level.	0.998138	0	TRUE	FALSE
DB00014	Goserelin	DB06151	Acetylcysteine	DDI type 15	Goserelin may decrease the excretion rate of Acetylcysteine which could result in a higher serum level.	0.999959	0	FALSE	FALSE
DB00014	Goserelin	DB06228	Rivaroxaban	DDI type 15	Goserelin may decrease the excretion rate of Rivaroxaban which could result in a higher serum level.	0.97981	0	TRUE	FALSE
DB00014	Goserelin	DB06264	Tolperisone	DDI type 32	The risk or severity of QTc prolongation can be increased when Goserelin is combined with Tolperisone.	0.996199	0	FALSE	TRUE
DB00014	Goserelin	DB06335	Saxagliptin	DDI type 13	The therapeutic efficacy of Saxagliptin can be decreased when used in combination with Goserelin.	0.997998	0	TRUE	FALSE
DB00014	Goserelin	DB06335	Saxagliptin	DDI type 15	Goserelin may decrease the excretion rate of Saxagliptin which could result in a higher serum level.	0.994913	0	FALSE	FALSE
DB00014	Goserelin	DB06605	Apixaban	DDI type 13	The therapeutic efficacy of Apixaban can be decreased when used in combination with Goserelin.	0.993962	0	FALSE	FALSE
DB00014	Goserelin	DB06605	Apixaban	DDI type 15	Goserelin may decrease the excretion rate of Apixaban which could result in a higher serum level.	0.976593	0	FALSE	FALSE
DB00014	Goserelin	DB06623	Flupirtine	DDI type 15	Goserelin may decrease the excretion rate of Flupirtine which could result in a higher serum level.	0.99751	0	TRUE	FALSE
DB00014	Goserelin	DB06637	Dalfampridine	DDI type 32	The risk or severity of QTc prolongation can be increased when Goserelin is combined with Dalfampridine.	0.995147	0	FALSE	TRUE
DB00014	Goserelin	DB06637	Dalfampridine	DDI type 15	Goserelin may decrease the excretion rate of Dalfampridine which could result in a higher serum level.	0.99977	0	TRUE	FALSE
DB00014	Goserelin	DB06698	Betahistine	DDI type 13	The therapeutic efficacy of Betahistine can be decreased when used in combination with Goserelin.	0.97719	0	FALSE	FALSE
DB00014	Goserelin	DB06698	Betahistine	DDI type 15	Goserelin may decrease the excretion rate of Betahistine which could result in a higher serum level.	0.975921	0	FALSE	FALSE
DB00014	Goserelin	DB06825	Triptorelin	DDI type 32	The risk or severity of QTc prolongation can be increased when Goserelin is combined with Triptorelin.	0.999158	0	FALSE	TRUE
DB00014	Goserelin	DB08818	Hyaluronic acid	DDI type 15	Goserelin may decrease the excretion rate of Hyaluronic acid which could result in a higher serum level.	0.99965	0	FALSE	FALSE
DB00014	Goserelin	DB08868	Fingolimod	DDI type 69	Goserelin may increase the immunosuppressive activities of Fingolimod.	0.999742	0	FALSE	FALSE
DB00014	Goserelin	DB08880	Teriflunomide	DDI type 15	Goserelin may decrease the excretion rate of Teriflunomide which could result in a higher serum level.	0.99966	0	FALSE	FALSE
DB00014	Goserelin	DB08906	Fluticasone furoate	DDI type 26	The risk or severity of adverse effects can be increased when Goserelin is combined with Fluticasone furoate.	0.996747	0	FALSE	TRUE		Flunisolide (DB00180; P04150), Amcinonide (DB00288; P04150), Fluorometholone (DB00324; P04150), Hydrocortisone (DB00741; P04150), Hydrocortamate (DB00769; P04150), Flurandrenolide (DB00846; P04150), Loteprednol etabonate (DB14596; P04150), Methylprednisolone (DB00959; P04150), Prednicarbate (DB01130; P04150), Budesonide (DB01222; P04150), Desonide (DB01260; P04150), Cortisone acetate (DB01380; P0…
DB00014	Goserelin	DB08906	Fluticasone furoate	DDI type 15	Goserelin may decrease the excretion rate of Fluticasone furoate which could result in a higher serum level.	0.976191	0	FALSE	FALSE
DB00014	Goserelin	DB08908	Dimethyl fumarate	DDI type 26	The risk or severity of adverse effects can be increased when Goserelin is combined with Dimethyl fumarate.	0.999489	0	FALSE	TRUE
DB00014	Goserelin	DB09020	Bisacodyl	DDI type 13	The therapeutic efficacy of Bisacodyl can be decreased when used in combination with Goserelin.	0.999925	0	FALSE	FALSE
DB00014	Goserelin	DB09020	Bisacodyl	DDI type 15	Goserelin may decrease the excretion rate of Bisacodyl which could result in a higher serum level.	0.975954	0	FALSE	FALSE
DB00014	Goserelin	DB09123	Dienogest	DDI type 15	Goserelin may decrease the excretion rate of Dienogest which could result in a higher serum level.	0.999864	0	TRUE	FALSE
DB00014	Goserelin	DB09124	Medrogestone	DDI type 15	Goserelin may decrease the excretion rate of Medrogestone which could result in a higher serum level.	0.999903	0	FALSE	FALSE
DB00014	Goserelin	DB09153	Sodium chloride	DDI type 15	Goserelin may decrease the excretion rate of Sodium chloride which could result in a higher serum level.	0.999707	0	FALSE	FALSE
DB00014	Goserelin	DB09268	Picosulfuric acid	DDI type 13	The therapeutic efficacy of Picosulfuric acid can be decreased when used in combination with Goserelin.	0.999755	0	FALSE	FALSE
DB00014	Goserelin	DB09268	Picosulfuric acid	DDI type 15	Goserelin may decrease the excretion rate of Picosulfuric acid which could result in a higher serum level.	0.999962	0	TRUE	FALSE
DB00014	Goserelin	DB09286	Pipamperone	DDI type 13	The therapeutic efficacy of Pipamperone can be decreased when used in combination with Goserelin.	0.993939	0	FALSE	FALSE
DB00014	Goserelin	DB09289	Tianeptine	DDI type 6	The metabolism of Tianeptine can be decreased when combined with Goserelin.	0.976783	0	FALSE	FALSE
DB00014	Goserelin	DB09292	Sacubitril	DDI type 15	Goserelin may decrease the excretion rate of Sacubitril which could result in a higher serum level.	0.999945	0	TRUE	FALSE
DB00014	Goserelin	DB09300	Butylscopolamine	DDI type 32	The risk or severity of QTc prolongation can be increased when Goserelin is combined with Butylscopolamine.	0.990047	0	FALSE	TRUE		Anisotropine methylbromide (DB00517; P20309), Tiotropium (DB01409; P20309), Mepenzolate (DB04843; P20309), Fesoterodine (DB06702; P20309), Aclidinium (DB08897; P20309)
DB00014	Goserelin	DB09449	Sodium phosphate, monobasic	DDI type 15	Goserelin may decrease the excretion rate of Sodium phosphate, monobasic which could result in a higher serum level.	0.992965	0	FALSE	FALSE
DB00014	Goserelin	DB09512	Simethicone	DDI type 32	The risk or severity of QTc prolongation can be increased when Goserelin is combined with Simethicone.	0.995792	0	FALSE	TRUE
DB00014	Goserelin	DB11073	Cetylpyridinium	DDI type 13	The therapeutic efficacy of Cetylpyridinium can be decreased when used in combination with Goserelin.	0.993757	0	FALSE	FALSE
DB00014	Goserelin	DB11135	Selenium	DDI type 32	The risk or severity of QTc prolongation can be increased when Goserelin is combined with Selenium.	0.981204	0	FALSE	TRUE
DB00014	Goserelin	DB11136	Chromium	DDI type 32	The risk or severity of QTc prolongation can be increased when Goserelin is combined with Chromium.	0.981204	0	FALSE	TRUE
DB00014	Goserelin	DB11642	Pitolisant	DDI type 76	Goserelin may increase the QTc-prolonging activities of Pitolisant.	0.999563	0	TRUE	FALSE
DB00014	Goserelin	DB12278	Propiverine	DDI type 15	Goserelin may decrease the excretion rate of Propiverine which could result in a higher serum level.	0.996221	0	TRUE	FALSE
DB00014	Goserelin	DB12310	Trehalose	DDI type 13	The therapeutic efficacy of Trehalose can be decreased when used in combination with Goserelin.	0.999837	0	FALSE	FALSE
DB00014	Goserelin	DB12371	Siponimod	DDI type 30	The risk or severity of hypertension can be increased when Siponimod is combined with Goserelin.	0.995439	0	FALSE	TRUE
DB00014	Goserelin	DB12582	Piperine	DDI type 15	Goserelin may decrease the excretion rate of Piperine which could result in a higher serum level.	0.995099	0	FALSE	FALSE
DB00014	Goserelin	DB12612	Ozanimod	DDI type 32	The risk or severity of QTc prolongation can be increased when Goserelin is combined with Ozanimod.	0.997519	0	FALSE	TRUE
DB00014	Goserelin	DB12612	Ozanimod	DDI type 15	Goserelin may decrease the excretion rate of Ozanimod which could result in a higher serum level.	0.990551	0	FALSE	FALSE
DB00014	Goserelin	DB12661	Urapidil	DDI type 13	The therapeutic efficacy of Urapidil can be decreased when used in combination with Goserelin.	0.99852	0	FALSE	FALSE
DB00014	Goserelin	DB12783	Benserazide	DDI type 15	Goserelin may decrease the excretion rate of Benserazide which could result in a higher serum level.	0.999968	0	TRUE	FALSE
DB00014	Goserelin	DB12846	Reproterol	DDI type 30	The risk or severity of hypertension can be increased when Reproterol is combined with Goserelin.	0.956585	0	FALSE	TRUE
DB00014	Goserelin	DB13178	Inositol	DDI type 15	Goserelin may decrease the excretion rate of Inositol which could result in a higher serum level.	0.999959	0	TRUE	FALSE
DB00014	Goserelin	DB13528	Chlormadinone	DDI type 15	Goserelin may decrease the excretion rate of Chlormadinone which could result in a higher serum level.	0.9999	0	FALSE	FALSE
DB00014	Goserelin	DB13619	Bornaprine	DDI type 15	Goserelin may decrease the excretion rate of Bornaprine which could result in a higher serum level.	0.997201	0	FALSE	FALSE
DB00014	Goserelin	DB13642	Pridinol	DDI type 32	The risk or severity of QTc prolongation can be increased when Goserelin is combined with Pridinol.	0.992694	0	FALSE	TRUE
DB00014	Goserelin	DB13787	Tilidine	DDI type 15	Goserelin may decrease the excretion rate of Tilidine which could result in a higher serum level.	0.988318	0	FALSE	FALSE
DB00014	Goserelin	DB13803	Xipamide	DDI type 15	Goserelin may decrease the excretion rate of Xipamide which could result in a higher serum level.	0.997649	0	FALSE	FALSE
DB00014	Goserelin	DB13919	Candesartan	DDI type 35	Goserelin may decrease the antihypertensive activities of Candesartan.	0.99717	0	FALSE	FALSE
DB00014	Goserelin	DB13956	Estradiol valerate	DDI type 15	Goserelin may decrease the excretion rate of Estradiol valerate which could result in a higher serum level.	0.992636	0	TRUE	FALSE
DB00014	Goserelin	DB14219	Monomethyl fumarate	DDI type 26	The risk or severity of adverse effects can be increased when Goserelin is combined with Monomethyl fumarate.	0.992697	0	FALSE	TRUE
DB00014	Goserelin	DB14219	Monomethyl fumarate	DDI type 15	Goserelin may decrease the excretion rate of Monomethyl fumarate which could result in a higher serum level.	0.998054	0	FALSE	FALSE
DB00014	Goserelin	DB14500	Potassium	DDI type 15	Goserelin may decrease the excretion rate of Potassium which could result in a higher serum level.	0.993532	0	FALSE	FALSE
DB00014	Goserelin	DB14509	Lithium carbonate	DDI type 15	Goserelin may decrease the excretion rate of Lithium carbonate which could result in a higher serum level.	0.999712	0	TRUE	FALSE
DB00014	Goserelin	DB14513	Magnesium	DDI type 15	Goserelin may decrease the excretion rate of Magnesium which could result in a higher serum level.	0.997462	0	FALSE	FALSE
DB00014	Goserelin	DB14681	Cortisone	DDI type 15	Goserelin may decrease the excretion rate of Cortisone which could result in a higher serum level.	0.999881	0	FALSE	FALSE
DB00014	Goserelin	DB14783	Diroximel fumarate	DDI type 26	The risk or severity of adverse effects can be increased when Goserelin is combined with Diroximel fumarate.	0.998011	0	FALSE	TRUE
DB00014	Goserelin	DB14785	Fenebrutinib	DDI type 32	The risk or severity of QTc prolongation can be increased when Goserelin is combined with Fenebrutinib.	0.945679	0	FALSE	TRUE
DB00014	Goserelin	DB16852	Remibrutinib	DDI type 10	The serum concentration of Remibrutinib can be increased when it is combined with Goserelin.	0.988947	0	FALSE	FALSE
DB00115	Cyanocobalamin	DB00014	Goserelin	DDI type 15	Cyanocobalamin may decrease the excretion rate of Goserelin which could result in a higher serum level.	0.999673	0	FALSE	FALSE
DB00115	Cyanocobalamin	DB00121	Biotin	DDI type 15	Cyanocobalamin may decrease the excretion rate of Biotin which could result in a higher serum level.	0.998889	5	FALSE	FALSE
DB00115	Cyanocobalamin	DB00122	Choline	DDI type 15	Cyanocobalamin may decrease the excretion rate of Choline which could result in a higher serum level.	0.998963	1	FALSE	FALSE
DB00115	Cyanocobalamin	DB00125	Arginine	DDI type 15	Cyanocobalamin may decrease the excretion rate of Arginine which could result in a higher serum level.	0.996961	0	FALSE	FALSE
DB00115	Cyanocobalamin	DB00126	Ascorbic acid	DDI type 26	The risk or severity of adverse effects can be increased when Cyanocobalamin is combined with Ascorbic acid.	0.974829	8	FALSE	TRUE	Hydroxocobalamin (DB00200; Q99707|P22033)
DB00115	Cyanocobalamin	DB00137	Lutein	DDI type 26	The risk or severity of adverse effects can be increased when Cyanocobalamin is combined with Lutein.	0.96739	1	FALSE	TRUE
DB00115	Cyanocobalamin	DB00138	Cystine	DDI type 15	Cyanocobalamin may decrease the excretion rate of Cystine which could result in a higher serum level.	0.998643	0	FALSE	FALSE
DB00115	Cyanocobalamin	DB00140	Riboflavin	DDI type 15	Cyanocobalamin may decrease the excretion rate of Riboflavin which could result in a higher serum level.	0.998232	3	FALSE	FALSE
DB00115	Cyanocobalamin	DB00152	Thiamine	DDI type 15	Cyanocobalamin may decrease the excretion rate of Thiamine which could result in a higher serum level.	0.999889	25	FALSE	FALSE
DB00115	Cyanocobalamin	DB00162	Vitamin A	DDI type 26	The risk or severity of adverse effects can be increased when Cyanocobalamin is combined with Vitamin A.	0.986899	2	FALSE	TRUE
DB00115	Cyanocobalamin	DB00162	Vitamin A	DDI type 15	Cyanocobalamin may decrease the excretion rate of Vitamin A which could result in a higher serum level.	0.995979	2	FALSE	FALSE
DB00115	Cyanocobalamin	DB00165	Pyridoxine	DDI type 15	Cyanocobalamin may decrease the excretion rate of Pyridoxine which could result in a higher serum level.	0.990412	27	FALSE	FALSE
DB00115	Cyanocobalamin	DB00166	Lipoic acid	DDI type 15	Cyanocobalamin may decrease the excretion rate of Lipoic acid which could result in a higher serum level.	0.997688	2	FALSE	FALSE
DB00115	Cyanocobalamin	DB00169	Cholecalciferol	DDI type 15	Cyanocobalamin may decrease the excretion rate of Cholecalciferol which could result in a higher serum level.	0.994962	62	FALSE	FALSE
DB00115	Cyanocobalamin	DB00175	Pravastatin	DDI type 15	Cyanocobalamin may decrease the excretion rate of Pravastatin which could result in a higher serum level.	0.975508	1	FALSE	FALSE
DB00115	Cyanocobalamin	DB00178	Ramipril	DDI type 15	Cyanocobalamin may decrease the excretion rate of Ramipril which could result in a higher serum level.	0.99805	8	FALSE	FALSE
DB00115	Cyanocobalamin	DB00181	Baclofen	DDI type 15	Cyanocobalamin may decrease the excretion rate of Baclofen which could result in a higher serum level.	0.989462	18	TRUE	FALSE
DB00115	Cyanocobalamin	DB00186	Lorazepam	DDI type 15	Cyanocobalamin may decrease the excretion rate of Lorazepam which could result in a higher serum level.	0.999978	1	TRUE	FALSE
DB00115	Cyanocobalamin	DB00190	Carbidopa	DDI type 15	Cyanocobalamin may decrease the excretion rate of Carbidopa which could result in a higher serum level.	0.99986	0	TRUE	FALSE
DB00115	Cyanocobalamin	DB00193	Tramadol	DDI type 15	Cyanocobalamin may decrease the excretion rate of Tramadol which could result in a higher serum level.	0.999947	0	TRUE	FALSE
DB00115	Cyanocobalamin	DB00196	Fluconazole	DDI type 15	Cyanocobalamin may decrease the excretion rate of Fluconazole which could result in a higher serum level.	0.999908	0	TRUE	FALSE
DB00115	Cyanocobalamin	DB00209	Trospium	DDI type 15	Cyanocobalamin may decrease the excretion rate of Trospium which could result in a higher serum level.	0.981914	1	FALSE	FALSE
DB00115	Cyanocobalamin	DB00213	Pantoprazole	DDI type 15	Cyanocobalamin may decrease the excretion rate of Pantoprazole which could result in a higher serum level.	0.998182	26	TRUE	FALSE
DB00115	Cyanocobalamin	DB00215	Citalopram	DDI type 15	Cyanocobalamin may decrease the excretion rate of Citalopram which could result in a higher serum level.	0.995345	2	FALSE	FALSE
DB00115	Cyanocobalamin	DB00222	Glimepiride	DDI type 15	Cyanocobalamin may decrease the excretion rate of Glimepiride which could result in a higher serum level.	0.999918	0	FALSE	FALSE
DB00115	Cyanocobalamin	DB00242	Cladribine	DDI type 26	The risk or severity of adverse effects can be increased when Cyanocobalamin is combined with Cladribine.	0.996992	0	FALSE	TRUE
DB00115	Cyanocobalamin	DB00243	Ranolazine	DDI type 15	Cyanocobalamin may decrease the excretion rate of Ranolazine which could result in a higher serum level.	0.997737	0	TRUE	FALSE
DB00115	Cyanocobalamin	DB00244	Mesalazine	DDI type 15	Cyanocobalamin may decrease the excretion rate of Mesalazine which could result in a higher serum level.	0.993625	0	FALSE	FALSE
DB00115	Cyanocobalamin	DB00254	Doxycycline	DDI type 15	Cyanocobalamin may decrease the excretion rate of Doxycycline which could result in a higher serum level.	0.982975	0	TRUE	FALSE
DB00115	Cyanocobalamin	DB00264	Metoprolol	DDI type 15	Cyanocobalamin may decrease the excretion rate of Metoprolol which could result in a higher serum level.	0.999652	2	TRUE	FALSE
DB00115	Cyanocobalamin	DB00273	Topiramate	DDI type 15	Cyanocobalamin may decrease the excretion rate of Topiramate which could result in a higher serum level.	0.999063	0	TRUE	FALSE
DB00115	Cyanocobalamin	DB00279	Liothyronine	DDI type 15	Cyanocobalamin may decrease the excretion rate of Liothyronine which could result in a higher serum level.	0.992938	0	TRUE	FALSE
DB00115	Cyanocobalamin	DB00281	Lidocaine	DDI type 15	Cyanocobalamin may decrease the excretion rate of Lidocaine which could result in a higher serum level.	0.999883	0	FALSE	FALSE
DB00115	Cyanocobalamin	DB00285	Venlafaxine	DDI type 15	Cyanocobalamin may decrease the excretion rate of Venlafaxine which could result in a higher serum level.	0.999961	0	TRUE	FALSE
DB00115	Cyanocobalamin	DB00294	Etonogestrel	DDI type 15	Cyanocobalamin may decrease the excretion rate of Etonogestrel which could result in a higher serum level.	0.99639	0	TRUE	FALSE
DB00115	Cyanocobalamin	DB00313	Valproic acid	DDI type 15	Cyanocobalamin may decrease the excretion rate of Valproic acid which could result in a higher serum level.	0.988723	2	FALSE	FALSE
DB00115	Cyanocobalamin	DB00315	Zolmitriptan	DDI type 15	Cyanocobalamin may decrease the excretion rate of Zolmitriptan which could result in a higher serum level.	0.999046	1	FALSE	FALSE
DB00115	Cyanocobalamin	DB00318	Codeine	DDI type 15	Cyanocobalamin may decrease the excretion rate of Codeine which could result in a higher serum level.	0.993976	0	FALSE	FALSE
DB00115	Cyanocobalamin	DB00321	Amitriptyline	DDI type 15	Cyanocobalamin may decrease the excretion rate of Amitriptyline which could result in a higher serum level.	0.999631	2	TRUE	FALSE
DB00115	Cyanocobalamin	DB00327	Hydromorphone	DDI type 15	Cyanocobalamin may decrease the excretion rate of Hydromorphone which could result in a higher serum level.	0.999898	0	TRUE	FALSE
DB00115	Cyanocobalamin	DB00331	Metformin	DDI type 15	Cyanocobalamin may decrease the excretion rate of Metformin which could result in a higher serum level.	0.999912	2	TRUE	FALSE
DB00115	Cyanocobalamin	DB00332	Ipratropium	DDI type 15	Cyanocobalamin may decrease the excretion rate of Ipratropium which could result in a higher serum level.	0.999641	0	FALSE	FALSE
DB00115	Cyanocobalamin	DB00338	Omeprazole	DDI type 15	Cyanocobalamin may decrease the excretion rate of Omeprazole which could result in a higher serum level.	0.994348	1	FALSE	FALSE
DB00115	Cyanocobalamin	DB00341	Cetirizine	DDI type 15	Cyanocobalamin may decrease the excretion rate of Cetirizine which could result in a higher serum level.	0.999893	0	TRUE	FALSE
DB00115	Cyanocobalamin	DB00370	Mirtazapine	DDI type 15	Cyanocobalamin may decrease the excretion rate of Mirtazapine which could result in a higher serum level.	0.982593	1	FALSE	FALSE
DB00115	Cyanocobalamin	DB00373	Timolol	DDI type 15	Cyanocobalamin may decrease the excretion rate of Timolol which could result in a higher serum level.	0.999891	1	TRUE	FALSE
DB00115	Cyanocobalamin	DB00378	Dydrogesterone	DDI type 15	Cyanocobalamin may decrease the excretion rate of Dydrogesterone which could result in a higher serum level.	0.992958	0	FALSE	FALSE
DB00115	Cyanocobalamin	DB00381	Amlodipine	DDI type 15	Cyanocobalamin may decrease the excretion rate of Amlodipine which could result in a higher serum level.	0.997417	2	FALSE	FALSE
DB00115	Cyanocobalamin	DB00391	Sulpiride	DDI type 22	Cyanocobalamin may increase the neurotoxic activities of Sulpiride.	0.998999	0	FALSE	TRUE		Ziprasidone (DB00246; P14416), Olanzapine (DB00334; P14416), Clozapine (DB00363; P14416), Loxapine (DB00408; P14416), Promazine (DB00420; P14416), Chlorpromazine (DB00477; P14416), Buspirone (DB00490; P14416), Haloperidol (DB00502; P14416), Triflupromazine (DB00508; P14416), Fluphenazine (DB00623; P14416), Risperidone (DB00734; P14416), Trifluoperazine (DB00831; P14416), Flupentixol (DB00875; P14…
DB00115	Cyanocobalamin	DB00391	Sulpiride	DDI type 15	Cyanocobalamin may decrease the excretion rate of Sulpiride which could result in a higher serum level.	0.999303	0	FALSE	FALSE
DB00115	Cyanocobalamin	DB00394	Beclomethasone dipropionate	DDI type 26	The risk or severity of adverse effects can be increased when Cyanocobalamin is combined with Beclomethasone dipropionate.	0.971772	1	FALSE	TRUE
DB00115	Cyanocobalamin	DB00396	Progesterone	DDI type 15	Cyanocobalamin may decrease the excretion rate of Progesterone which could result in a higher serum level.	0.99412	2	FALSE	FALSE
DB00115	Cyanocobalamin	DB00399	Zoledronic acid	DDI type 63	Cyanocobalamin may increase the hypocalcemic activities of Zoledronic acid.	0.998576	1	FALSE	FALSE
DB00115	Cyanocobalamin	DB00401	Nisoldipine	DDI type 15	Cyanocobalamin may decrease the excretion rate of Nisoldipine which could result in a higher serum level.	0.999881	0	TRUE	FALSE
DB00115	Cyanocobalamin	DB00413	Pramipexole	DDI type 15	Cyanocobalamin may decrease the excretion rate of Pramipexole which could result in a higher serum level.	0.999917	1	TRUE	FALSE
DB00115	Cyanocobalamin	DB00425	Zolpidem	DDI type 15	Cyanocobalamin may decrease the excretion rate of Zolpidem which could result in a higher serum level.	0.994835	0	FALSE	FALSE
DB00115	Cyanocobalamin	DB00437	Allopurinol	DDI type 15	Cyanocobalamin may decrease the excretion rate of Allopurinol which could result in a higher serum level.	0.999717	0	TRUE	FALSE
DB00115	Cyanocobalamin	DB00440	Trimethoprim	DDI type 15	Cyanocobalamin may decrease the excretion rate of Trimethoprim which could result in a higher serum level.	0.999754	0	TRUE	FALSE
DB00115	Cyanocobalamin	DB00443	Betamethasone	DDI type 26	The risk or severity of adverse effects can be increased when Cyanocobalamin is combined with Betamethasone.	0.99762	0	FALSE	TRUE
DB00115	Cyanocobalamin	DB00451	Levothyroxine	DDI type 15	Cyanocobalamin may decrease the excretion rate of Levothyroxine which could result in a higher serum level.	0.968911	10	FALSE	FALSE
DB00115	Cyanocobalamin	DB00455	Loratadine	DDI type 15	Cyanocobalamin may decrease the excretion rate of Loratadine which could result in a higher serum level.	0.999884	0	FALSE	FALSE
DB00115	Cyanocobalamin	DB00468	Quinine	DDI type 15	Cyanocobalamin may decrease the excretion rate of Quinine which could result in a higher serum level.	0.99877	0	FALSE	FALSE
DB00115	Cyanocobalamin	DB00476	Duloxetine	DDI type 15	Cyanocobalamin may decrease the excretion rate of Duloxetine which could result in a higher serum level.	0.999933	5	TRUE	FALSE
DB00115	Cyanocobalamin	DB00497	Oxycodone	DDI type 15	Cyanocobalamin may decrease the excretion rate of Oxycodone which could result in a higher serum level.	0.998925	0	FALSE	FALSE
DB00115	Cyanocobalamin	DB00537	Ciprofloxacin	DDI type 15	Cyanocobalamin may decrease the excretion rate of Ciprofloxacin which could result in a higher serum level.	0.99996	0	TRUE	FALSE
DB00115	Cyanocobalamin	DB00555	Lamotrigine	DDI type 15	Cyanocobalamin may decrease the excretion rate of Lamotrigine which could result in a higher serum level.	0.999597	0	TRUE	FALSE
DB00115	Cyanocobalamin	DB00564	Carbamazepine	DDI type 26	The risk or severity of adverse effects can be increased when Cyanocobalamin is combined with Carbamazepine.	0.999169	1	FALSE	TRUE		Topiramate (DB00273; P35498), Lamotrigine (DB00555; P35498)
DB00115	Cyanocobalamin	DB00571	Propranolol	DDI type 15	Cyanocobalamin may decrease the excretion rate of Propranolol which could result in a higher serum level.	0.991817	0	TRUE	FALSE
DB00115	Cyanocobalamin	DB00581	Lactulose	DDI type 13	The therapeutic efficacy of Lactulose can be decreased when used in combination with Cyanocobalamin.	0.999257	0	FALSE	FALSE
DB00115	Cyanocobalamin	DB00583	Levocarnitine	DDI type 15	Cyanocobalamin may decrease the excretion rate of Levocarnitine which could result in a higher serum level.	0.996215	1	TRUE	FALSE
DB00115	Cyanocobalamin	DB00584	Enalapril	DDI type 15	Cyanocobalamin may decrease the excretion rate of Enalapril which could result in a higher serum level.	0.999097	0	FALSE	FALSE
DB00115	Cyanocobalamin	DB00588	Fluticasone propionate	DDI type 26	The risk or severity of adverse effects can be increased when Cyanocobalamin is combined with Fluticasone propionate.	0.999785	1	FALSE	TRUE
DB00115	Cyanocobalamin	DB00588	Fluticasone propionate	DDI type 15	Cyanocobalamin may decrease the excretion rate of Fluticasone propionate which could result in a higher serum level.	0.999311	1	FALSE	FALSE
DB00115	Cyanocobalamin	DB00603	Medroxyprogesterone acetate	DDI type 15	Cyanocobalamin may decrease the excretion rate of Medroxyprogesterone acetate which could result in a higher serum level.	0.998237	0	TRUE	FALSE
DB00115	Cyanocobalamin	DB00612	Bisoprolol	DDI type 15	Cyanocobalamin may decrease the excretion rate of Bisoprolol which could result in a higher serum level.	0.997696	6	TRUE	FALSE
DB00115	Cyanocobalamin	DB00630	Alendronic acid	DDI type 63	Cyanocobalamin may increase the hypocalcemic activities of Alendronic acid.	0.97799	1	FALSE	FALSE
DB00115	Cyanocobalamin	DB00635	Prednisone	DDI type 26	The risk or severity of adverse effects can be increased when Cyanocobalamin is combined with Prednisone.	0.997963	0	FALSE	TRUE
DB00115	Cyanocobalamin	DB00635	Prednisone	DDI type 15	Cyanocobalamin may decrease the excretion rate of Prednisone which could result in a higher serum level.	0.998702	0	TRUE	FALSE
DB00115	Cyanocobalamin	DB00656	Trazodone	DDI type 15	Cyanocobalamin may decrease the excretion rate of Trazodone which could result in a higher serum level.	0.989724	0	FALSE	FALSE
DB00115	Cyanocobalamin	DB00669	Sumatriptan	DDI type 15	Cyanocobalamin may decrease the excretion rate of Sumatriptan which could result in a higher serum level.	0.99994	1	TRUE	FALSE
DB00115	Cyanocobalamin	DB00675	Tamoxifen	DDI type 15	Cyanocobalamin may decrease the excretion rate of Tamoxifen which could result in a higher serum level.	0.997541	0	FALSE	FALSE
DB00115	Cyanocobalamin	DB00687	Fludrocortisone	DDI type 26	The risk or severity of adverse effects can be increased when Cyanocobalamin is combined with Fludrocortisone.	0.998731	0	FALSE	TRUE
DB00115	Cyanocobalamin	DB00698	Nitrofurantoin	DDI type 15	Cyanocobalamin may decrease the excretion rate of Nitrofurantoin which could result in a higher serum level.	0.999693	0	TRUE	FALSE
DB00115	Cyanocobalamin	DB00706	Tamsulosin	DDI type 15	Cyanocobalamin may decrease the excretion rate of Tamsulosin which could result in a higher serum level.	0.995346	2	TRUE	FALSE
DB00115	Cyanocobalamin	DB00722	Lisinopril	DDI type 15	Cyanocobalamin may decrease the excretion rate of Lisinopril which could result in a higher serum level.	0.999879	0	TRUE	FALSE
DB00115	Cyanocobalamin	DB00726	Trimipramine	DDI type 15	Cyanocobalamin may decrease the excretion rate of Trimipramine which could result in a higher serum level.	0.973016	0	FALSE	FALSE
DB00115	Cyanocobalamin	DB00736	Esomeprazole	DDI type 15	Cyanocobalamin may decrease the excretion rate of Esomeprazole which could result in a higher serum level.	0.994229	0	FALSE	FALSE
DB00115	Cyanocobalamin	DB00741	Hydrocortisone	DDI type 26	The risk or severity of adverse effects can be increased when Cyanocobalamin is combined with Hydrocortisone.	0.9834	0	FALSE	TRUE
DB00115	Cyanocobalamin	DB00763	Methimazole	DDI type 15	Cyanocobalamin may decrease the excretion rate of Methimazole which could result in a higher serum level.	0.975257	0	FALSE	FALSE
DB00115	Cyanocobalamin	DB00764	Mometasone	DDI type 26	The risk or severity of adverse effects can be increased when Cyanocobalamin is combined with Mometasone.	0.999919	0	FALSE	TRUE
DB00115	Cyanocobalamin	DB00783	Estradiol	DDI type 15	Cyanocobalamin may decrease the excretion rate of Estradiol which could result in a higher serum level.	0.999239	2	TRUE	FALSE
DB00115	Cyanocobalamin	DB00790	Perindopril	DDI type 15	Cyanocobalamin may decrease the excretion rate of Perindopril which could result in a higher serum level.	0.999948	0	TRUE	FALSE
DB00115	Cyanocobalamin	DB00794	Primidone	DDI type 15	Cyanocobalamin may decrease the excretion rate of Primidone which could result in a higher serum level.	0.973166	0	FALSE	FALSE
DB00115	Cyanocobalamin	DB00813	Fentanyl	DDI type 15	Cyanocobalamin may decrease the excretion rate of Fentanyl which could result in a higher serum level.	0.999735	0	TRUE	FALSE
DB00115	Cyanocobalamin	DB00820	Tadalafil	DDI type 15	Cyanocobalamin may decrease the excretion rate of Tadalafil which could result in a higher serum level.	0.998906	0	TRUE	FALSE
DB00115	Cyanocobalamin	DB00829	Diazepam	DDI type 15	Cyanocobalamin may decrease the excretion rate of Diazepam which could result in a higher serum level.	0.999904	0	TRUE	FALSE
DB00115	Cyanocobalamin	DB00860	Prednisolone	DDI type 26	The risk or severity of adverse effects can be increased when Cyanocobalamin is combined with Prednisolone.	0.999633	7	FALSE	TRUE
DB00115	Cyanocobalamin	DB00863	Ranitidine	DDI type 15	Cyanocobalamin may decrease the excretion rate of Ranitidine which could result in a higher serum level.	0.999781	0	TRUE	FALSE
DB00115	Cyanocobalamin	DB00876	Eprosartan	DDI type 26	The risk or severity of adverse effects can be increased when Cyanocobalamin is combined with Eprosartan.	0.999935	0	FALSE	TRUE		Losartan (DB00678; P30556), Candesartan cilexetil (DB00796; P30556)
DB00115	Cyanocobalamin	DB00876	Eprosartan	DDI type 15	Cyanocobalamin may decrease the excretion rate of Eprosartan which could result in a higher serum level.	0.993106	0	FALSE	FALSE
DB00115	Cyanocobalamin	DB00884	Risedronic acid	DDI type 63	Cyanocobalamin may increase the hypocalcemic activities of Risedronic acid.	0.986349	0	FALSE	FALSE
DB00115	Cyanocobalamin	DB00925	Phenoxybenzamine	DDI type 15	Cyanocobalamin may decrease the excretion rate of Phenoxybenzamine which could result in a higher serum level.	0.998062	0	FALSE	FALSE
DB00115	Cyanocobalamin	DB00946	Phenprocoumon	DDI type 27	The risk or severity of bleeding can be increased when Cyanocobalamin is combined with Phenprocoumon.	0.998224	1	FALSE	TRUE
DB00115	Cyanocobalamin	DB00950	Fexofenadine	DDI type 15	Cyanocobalamin may decrease the excretion rate of Fexofenadine which could result in a higher serum level.	0.998505	0	FALSE	FALSE
DB00115	Cyanocobalamin	DB00951	Isoniazid	DDI type 15	Cyanocobalamin may decrease the excretion rate of Isoniazid which could result in a higher serum level.	0.999022	0	TRUE	FALSE
DB00115	Cyanocobalamin	DB00952	Naratriptan	DDI type 15	Cyanocobalamin may decrease the excretion rate of Naratriptan which could result in a higher serum level.	0.99983	0	FALSE	FALSE
DB00115	Cyanocobalamin	DB00953	Rizatriptan	DDI type 15	Cyanocobalamin may decrease the excretion rate of Rizatriptan which could result in a higher serum level.	0.999894	0	TRUE	FALSE
DB00115	Cyanocobalamin	DB00959	Methylprednisolone	DDI type 26	The risk or severity of adverse effects can be increased when Cyanocobalamin is combined with Methylprednisolone.	0.998622	15	FALSE	TRUE
DB00115	Cyanocobalamin	DB00967	Desloratadine	DDI type 15	Cyanocobalamin may decrease the excretion rate of Desloratadine which could result in a higher serum level.	0.998844	0	FALSE	FALSE
DB00115	Cyanocobalamin	DB00973	Ezetimibe	DDI type 15	Cyanocobalamin may decrease the excretion rate of Ezetimibe which could result in a higher serum level.	0.999705	1	FALSE	FALSE
DB00115	Cyanocobalamin	DB00977	Ethinylestradiol	DDI type 15	Cyanocobalamin may decrease the excretion rate of Ethinylestradiol which could result in a higher serum level.	0.996689	6	FALSE	FALSE
DB00115	Cyanocobalamin	DB00979	Cyclopentolate	DDI type 15	Cyanocobalamin may decrease the excretion rate of Cyclopentolate which could result in a higher serum level.	0.998415	0	FALSE	FALSE
DB00115	Cyanocobalamin	DB00983	Formoterol	DDI type 15	Cyanocobalamin may decrease the excretion rate of Formoterol which could result in a higher serum level.	0.999788	1	FALSE	FALSE
DB00115	Cyanocobalamin	DB00989	Rivastigmine	DDI type 15	Cyanocobalamin may decrease the excretion rate of Rivastigmine which could result in a higher serum level.	0.999445	0	FALSE	FALSE
DB00115	Cyanocobalamin	DB00993	Azathioprine	DDI type 15	Cyanocobalamin may decrease the excretion rate of Azathioprine which could result in a higher serum level.	0.999559	0	TRUE	FALSE
DB00115	Cyanocobalamin	DB00996	Gabapentin	DDI type 15	Cyanocobalamin may decrease the excretion rate of Gabapentin which could result in a higher serum level.	0.997445	6	FALSE	FALSE
DB00115	Cyanocobalamin	DB01001	Salbutamol	DDI type 15	Cyanocobalamin may decrease the excretion rate of Salbutamol which could result in a higher serum level.	0.999695	2	TRUE	FALSE
DB00115	Cyanocobalamin	DB01015	Sulfamethoxazole	DDI type 15	Cyanocobalamin may decrease the excretion rate of Sulfamethoxazole which could result in a higher serum level.	0.998886	0	TRUE	FALSE
DB00115	Cyanocobalamin	DB01019	Bethanechol	DDI type 26	The risk or severity of adverse effects can be increased when Cyanocobalamin is combined with Bethanechol.	0.950126	1	FALSE	TRUE	Hydroxocobalamin (DB00200; Q99707|P22033)	Cevimeline (DB00185; P20309), Methacholine (DB06709; P20309)
DB00115	Cyanocobalamin	DB01019	Bethanechol	DDI type 15	Cyanocobalamin may decrease the excretion rate of Bethanechol which could result in a higher serum level.	0.998138	1	FALSE	FALSE
DB00115	Cyanocobalamin	DB01036	Tolterodine	DDI type 15	Cyanocobalamin may decrease the excretion rate of Tolterodine which could result in a higher serum level.	0.999544	1	TRUE	FALSE
DB00115	Cyanocobalamin	DB01039	Fenofibrate	DDI type 15	Cyanocobalamin may decrease the excretion rate of Fenofibrate which could result in a higher serum level.	0.95386	0	TRUE	FALSE
DB00115	Cyanocobalamin	DB01043	Memantine	DDI type 15	Cyanocobalamin may decrease the excretion rate of Memantine which could result in a higher serum level.	0.999942	0	TRUE	FALSE
DB00115	Cyanocobalamin	DB01062	Oxybutynin	DDI type 15	Cyanocobalamin may decrease the excretion rate of Oxybutynin which could result in a higher serum level.	0.99917	2	FALSE	FALSE
DB00115	Cyanocobalamin	DB01065	Melatonin	DDI type 15	Cyanocobalamin may decrease the excretion rate of Melatonin which could result in a higher serum level.	0.994679	1	FALSE	FALSE
DB00115	Cyanocobalamin	DB01068	Clonazepam	DDI type 15	Cyanocobalamin may decrease the excretion rate of Clonazepam which could result in a higher serum level.	0.999977	0	TRUE	FALSE
DB00115	Cyanocobalamin	DB01075	Diphenhydramine	DDI type 13	The therapeutic efficacy of Diphenhydramine can be decreased when used in combination with Cyanocobalamin.	0.969626	1	FALSE	FALSE
DB00115	Cyanocobalamin	DB01075	Diphenhydramine	DDI type 15	Cyanocobalamin may decrease the excretion rate of Diphenhydramine which could result in a higher serum level.	0.999494	1	FALSE	FALSE
DB00115	Cyanocobalamin	DB01086	Benzocaine	DDI type 6	The metabolism of Benzocaine can be decreased when combined with Cyanocobalamin.	0.974151	0	FALSE	FALSE
DB00115	Cyanocobalamin	DB01095	Fluvastatin	DDI type 6	The metabolism of Fluvastatin can be decreased when combined with Cyanocobalamin.	0.994931	0	FALSE	FALSE
DB00115	Cyanocobalamin	DB01097	Leflunomide	DDI type 26	The risk or severity of adverse effects can be increased when Cyanocobalamin is combined with Leflunomide.	0.999943	0	FALSE	TRUE
DB00115	Cyanocobalamin	DB01097	Leflunomide	DDI type 15	Cyanocobalamin may decrease the excretion rate of Leflunomide which could result in a higher serum level.	0.999225	0	FALSE	FALSE
DB00115	Cyanocobalamin	DB01098	Rosuvastatin	DDI type 15	Cyanocobalamin may decrease the excretion rate of Rosuvastatin which could result in a higher serum level.	0.998645	1	FALSE	FALSE
DB00115	Cyanocobalamin	DB01104	Sertraline	DDI type 15	Cyanocobalamin may decrease the excretion rate of Sertraline which could result in a higher serum level.	0.997296	0	FALSE	FALSE
DB00115	Cyanocobalamin	DB01114	Chlorpheniramine	DDI type 15	Cyanocobalamin may decrease the excretion rate of Chlorpheniramine which could result in a higher serum level.	0.978382	0	FALSE	FALSE
DB00115	Cyanocobalamin	DB01128	Bicalutamide	DDI type 15	Cyanocobalamin may decrease the excretion rate of Bicalutamide which could result in a higher serum level.	0.996255	0	FALSE	FALSE
DB00115	Cyanocobalamin	DB01137	Levofloxacin	DDI type 15	Cyanocobalamin may decrease the excretion rate of Levofloxacin which could result in a higher serum level.	0.99912	0	TRUE	FALSE
DB00115	Cyanocobalamin	DB01142	Doxepin	DDI type 15	Cyanocobalamin may decrease the excretion rate of Doxepin which could result in a higher serum level.	0.999815	0	TRUE	FALSE
DB00115	Cyanocobalamin	DB01156	Bupropion	DDI type 15	Cyanocobalamin may decrease the excretion rate of Bupropion which could result in a higher serum level.	0.999976	0	TRUE	FALSE
DB00115	Cyanocobalamin	DB01175	Escitalopram	DDI type 15	Cyanocobalamin may decrease the excretion rate of Escitalopram which could result in a higher serum level.	0.995345	5	FALSE	FALSE
DB00115	Cyanocobalamin	DB01183	Naloxone	DDI type 15	Cyanocobalamin may decrease the excretion rate of Naloxone which could result in a higher serum level.	0.999934	4	TRUE	FALSE
DB00115	Cyanocobalamin	DB01195	Flecainide	DDI type 15	Cyanocobalamin may decrease the excretion rate of Flecainide which could result in a higher serum level.	0.999586	0	FALSE	FALSE
DB00115	Cyanocobalamin	DB01197	Captopril	DDI type 15	Cyanocobalamin may decrease the excretion rate of Captopril which could result in a higher serum level.	0.998358	0	FALSE	FALSE
DB00115	Cyanocobalamin	DB01198	Zopiclone	DDI type 15	Cyanocobalamin may decrease the excretion rate of Zopiclone which could result in a higher serum level.	0.995889	7	FALSE	FALSE
DB00115	Cyanocobalamin	DB01204	Mitoxantrone	DDI type 26	The risk or severity of adverse effects can be increased when Cyanocobalamin is combined with Mitoxantrone.	0.99988	6	FALSE	TRUE
DB00115	Cyanocobalamin	DB01216	Finasteride	DDI type 15	Cyanocobalamin may decrease the excretion rate of Finasteride which could result in a higher serum level.	0.998709	0	FALSE	FALSE
DB00115	Cyanocobalamin	DB01222	Budesonide	DDI type 26	The risk or severity of adverse effects can be increased when Cyanocobalamin is combined with Budesonide.	0.999467	2	FALSE	TRUE
DB00115	Cyanocobalamin	DB01222	Budesonide	DDI type 15	Cyanocobalamin may decrease the excretion rate of Budesonide which could result in a higher serum level.	0.991437	2	TRUE	FALSE
DB00115	Cyanocobalamin	DB01224	Quetiapine	DDI type 15	Cyanocobalamin may decrease the excretion rate of Quetiapine which could result in a higher serum level.	0.999012	0	TRUE	FALSE
DB00115	Cyanocobalamin	DB01233	Metoclopramide	DDI type 15	Cyanocobalamin may decrease the excretion rate of Metoclopramide which could result in a higher serum level.	0.999896	0	TRUE	FALSE
DB00115	Cyanocobalamin	DB01234	Dexamethasone	DDI type 26	The risk or severity of adverse effects can be increased when Cyanocobalamin is combined with Dexamethasone.	0.99762	1	FALSE	TRUE
DB00115	Cyanocobalamin	DB01235	Levodopa	DDI type 15	Cyanocobalamin may decrease the excretion rate of Levodopa which could result in a higher serum level.	0.999879	1	FALSE	FALSE
DB00115	Cyanocobalamin	DB01261	Sitagliptin	DDI type 15	Cyanocobalamin may decrease the excretion rate of Sitagliptin which could result in a higher serum level.	0.998465	0	TRUE	FALSE
DB00115	Cyanocobalamin	DB01288	Fenoterol	DDI type 15	Cyanocobalamin may decrease the excretion rate of Fenoterol which could result in a higher serum level.	0.984159	0	FALSE	FALSE
DB00115	Cyanocobalamin	DB01373	Calcium	DDI type 15	Cyanocobalamin may decrease the excretion rate of Calcium which could result in a higher serum level.	0.9998	5	FALSE	FALSE
DB00115	Cyanocobalamin	DB01390	Sodium bicarbonate	DDI type 15	Cyanocobalamin may decrease the excretion rate of Sodium bicarbonate which could result in a higher serum level.	0.999982	3	FALSE	FALSE
DB00115	Cyanocobalamin	DB01409	Tiotropium	DDI type 15	Cyanocobalamin may decrease the excretion rate of Tiotropium which could result in a higher serum level.	0.9991	0	TRUE	FALSE
DB00115	Cyanocobalamin	DB01422	Nitroxoline	DDI type 15	Cyanocobalamin may decrease the excretion rate of Nitroxoline which could result in a higher serum level.	0.999988	0	FALSE	FALSE
DB00115	Cyanocobalamin	DB01436	Alfacalcidol	DDI type 26	The risk or severity of adverse effects can be increased when Cyanocobalamin is combined with Alfacalcidol.	0.975538	0	FALSE	TRUE		Ergocalciferol (DB00153; P11473), Paricalcitol (DB00910; P11473), Dihydrotachysterol (DB01070; P11473)
DB00115	Cyanocobalamin	DB01586	Ursodeoxycholic acid	DDI type 15	Cyanocobalamin may decrease the excretion rate of Ursodeoxycholic acid which could result in a higher serum level.	0.99746	0	FALSE	FALSE
DB00115	Cyanocobalamin	DB01591	Solifenacin	DDI type 15	Cyanocobalamin may decrease the excretion rate of Solifenacin which could result in a higher serum level.	0.997534	4	FALSE	FALSE
DB00115	Cyanocobalamin	DB01592	Iron	DDI type 15	Cyanocobalamin may decrease the excretion rate of Iron which could result in a higher serum level.	0.999783	2	FALSE	FALSE
DB00115	Cyanocobalamin	DB01593	Zinc	DDI type 15	Cyanocobalamin may decrease the excretion rate of Zinc which could result in a higher serum level.	0.999783	6	FALSE	FALSE
DB00115	Cyanocobalamin	DB01611	Hydroxychloroquine	DDI type 26	The risk or severity of adverse effects can be increased when Cyanocobalamin is combined with Hydroxychloroquine.	0.999879	0	FALSE	TRUE
DB00115	Cyanocobalamin	DB01783	Pantothenic acid	DDI type 13	The therapeutic efficacy of Pantothenic acid can be decreased when used in combination with Cyanocobalamin.	0.972427	3	FALSE	FALSE
DB00115	Cyanocobalamin	DB01783	Pantothenic acid	DDI type 15	Cyanocobalamin may decrease the excretion rate of Pantothenic acid which could result in a higher serum level.	0.99956	3	FALSE	FALSE
DB00115	Cyanocobalamin	DB02714	3'-Uridinemonophosphate	DDI type 26	The risk or severity of adverse effects can be increased when Cyanocobalamin is combined with 3'-Uridinemonophosphate.	0.998837	1	FALSE	TRUE
DB00115	Cyanocobalamin	DB03766	Propanoic acid	DDI type 13	The therapeutic efficacy of Propanoic acid can be decreased when used in combination with Cyanocobalamin.	0.979399	0	FALSE	FALSE
DB00115	Cyanocobalamin	DB03766	Propanoic acid	DDI type 15	Cyanocobalamin may decrease the excretion rate of Propanoic acid which could result in a higher serum level.	0.982409	0	FALSE	FALSE
DB00115	Cyanocobalamin	DB04398	Lactic acid	DDI type 13	The therapeutic efficacy of Lactic acid can be decreased when used in combination with Cyanocobalamin.	0.979054	0	FALSE	FALSE
DB00115	Cyanocobalamin	DB04573	Estriol	DDI type 13	The therapeutic efficacy of Estriol can be decreased when used in combination with Cyanocobalamin.	0.990857	0	FALSE	FALSE
DB00115	Cyanocobalamin	DB04703	Hesperidin	DDI type 26	The risk or severity of adverse effects can be increased when Cyanocobalamin is combined with Hesperidin.	0.99419	1	FALSE	TRUE
DB00115	Cyanocobalamin	DB04817	Metamizole	DDI type 15	Cyanocobalamin may decrease the excretion rate of Metamizole which could result in a higher serum level.	0.980914	3	FALSE	FALSE
DB00115	Cyanocobalamin	DB04896	Milnacipran	DDI type 15	Cyanocobalamin may decrease the excretion rate of Milnacipran which could result in a higher serum level.	0.999971	0	TRUE	FALSE
DB00115	Cyanocobalamin	DB05271	Rotigotine	DDI type 15	Cyanocobalamin may decrease the excretion rate of Rotigotine which could result in a higher serum level.	0.999085	0	FALSE	FALSE
DB00115	Cyanocobalamin	DB05382	Iodine	DDI type 15	Cyanocobalamin may decrease the excretion rate of Iodine which could result in a higher serum level.	0.999742	3	FALSE	FALSE
DB00115	Cyanocobalamin	DB05541	Brivaracetam	DDI type 15	Cyanocobalamin may decrease the excretion rate of Brivaracetam which could result in a higher serum level.	0.999955	1	TRUE	FALSE
DB00115	Cyanocobalamin	DB06148	Mianserin	DDI type 15	Cyanocobalamin may decrease the excretion rate of Mianserin which could result in a higher serum level.	0.953561	0	FALSE	FALSE
DB00115	Cyanocobalamin	DB06151	Acetylcysteine	DDI type 15	Cyanocobalamin may decrease the excretion rate of Acetylcysteine which could result in a higher serum level.	0.998834	0	FALSE	FALSE
DB00115	Cyanocobalamin	DB06204	Tapentadol	DDI type 15	Cyanocobalamin may decrease the excretion rate of Tapentadol which could result in a higher serum level.	0.990195	0	FALSE	FALSE
DB00115	Cyanocobalamin	DB06228	Rivaroxaban	DDI type 15	Cyanocobalamin may decrease the excretion rate of Rivaroxaban which could result in a higher serum level.	0.989592	1	TRUE	FALSE
DB00115	Cyanocobalamin	DB06264	Tolperisone	DDI type 15	Cyanocobalamin may decrease the excretion rate of Tolperisone which could result in a higher serum level.	0.999939	0	FALSE	FALSE
DB00115	Cyanocobalamin	DB06335	Saxagliptin	DDI type 15	Cyanocobalamin may decrease the excretion rate of Saxagliptin which could result in a higher serum level.	0.999945	0	TRUE	FALSE
DB00115	Cyanocobalamin	DB06594	Agomelatine	DDI type 15	Cyanocobalamin may decrease the excretion rate of Agomelatine which could result in a higher serum level.	0.986852	0	FALSE	FALSE
DB00115	Cyanocobalamin	DB06605	Apixaban	DDI type 15	Cyanocobalamin may decrease the excretion rate of Apixaban which could result in a higher serum level.	0.989111	0	FALSE	FALSE
DB00115	Cyanocobalamin	DB06623	Flupirtine	DDI type 15	Cyanocobalamin may decrease the excretion rate of Flupirtine which could result in a higher serum level.	0.9999	0	TRUE	FALSE
DB00115	Cyanocobalamin	DB06637	Dalfampridine	DDI type 15	Cyanocobalamin may decrease the excretion rate of Dalfampridine which could result in a higher serum level.	0.999804	13	TRUE	FALSE
DB00115	Cyanocobalamin	DB06698	Betahistine	DDI type 15	Cyanocobalamin may decrease the excretion rate of Betahistine which could result in a higher serum level.	0.973039	0	FALSE	FALSE
DB00115	Cyanocobalamin	DB08801	Dimetindene	DDI type 15	Cyanocobalamin may decrease the excretion rate of Dimetindene which could result in a higher serum level.	0.993606	6	FALSE	FALSE
DB00115	Cyanocobalamin	DB08818	Hyaluronic acid	DDI type 15	Cyanocobalamin may decrease the excretion rate of Hyaluronic acid which could result in a higher serum level.	0.999747	0	FALSE	FALSE
DB00115	Cyanocobalamin	DB08868	Fingolimod	DDI type 69	Cyanocobalamin may increase the immunosuppressive activities of Fingolimod.	0.999817	6	FALSE	FALSE
DB00115	Cyanocobalamin	DB08868	Fingolimod	DDI type 15	Cyanocobalamin may decrease the excretion rate of Fingolimod which could result in a higher serum level.	0.9997	6	FALSE	FALSE
DB00115	Cyanocobalamin	DB08880	Teriflunomide	DDI type 26	The risk or severity of adverse effects can be increased when Cyanocobalamin is combined with Teriflunomide.	0.998839	3	FALSE	TRUE
DB00115	Cyanocobalamin	DB08880	Teriflunomide	DDI type 15	Cyanocobalamin may decrease the excretion rate of Teriflunomide which could result in a higher serum level.	0.996973	3	FALSE	FALSE
DB00115	Cyanocobalamin	DB08893	Mirabegron	DDI type 15	Cyanocobalamin may decrease the excretion rate of Mirabegron which could result in a higher serum level.	0.999361	0	TRUE	FALSE
DB00115	Cyanocobalamin	DB08906	Fluticasone furoate	DDI type 26	The risk or severity of adverse effects can be increased when Cyanocobalamin is combined with Fluticasone furoate.	0.999963	0	FALSE	TRUE
DB00115	Cyanocobalamin	DB08906	Fluticasone furoate	DDI type 15	Cyanocobalamin may decrease the excretion rate of Fluticasone furoate which could result in a higher serum level.	0.982049	0	FALSE	FALSE
DB00115	Cyanocobalamin	DB08908	Dimethyl fumarate	DDI type 26	The risk or severity of adverse effects can be increased when Cyanocobalamin is combined with Dimethyl fumarate.	0.999893	3	FALSE	TRUE
DB00115	Cyanocobalamin	DB09020	Bisacodyl	DDI type 13	The therapeutic efficacy of Bisacodyl can be decreased when used in combination with Cyanocobalamin.	0.999896	0	FALSE	FALSE
DB00115	Cyanocobalamin	DB09026	Aliskiren	DDI type 15	Cyanocobalamin may decrease the excretion rate of Aliskiren which could result in a higher serum level.	0.999271	1	FALSE	FALSE
DB00115	Cyanocobalamin	DB09061	Cannabidiol	DDI type 15	Cyanocobalamin may decrease the excretion rate of Cannabidiol which could result in a higher serum level.	0.999771	8	FALSE	FALSE
DB00115	Cyanocobalamin	DB09070	Tibolone	DDI type 15	Cyanocobalamin may decrease the excretion rate of Tibolone which could result in a higher serum level.	0.994071	1	FALSE	FALSE
DB00115	Cyanocobalamin	DB09082	Vilanterol	DDI type 26	The risk or severity of adverse effects can be increased when Cyanocobalamin is combined with Vilanterol.	0.99979	0	FALSE	TRUE		Norepinephrine (DB00368; P07550), Dipivefrin (DB00449; P07550), Epinephrine (DB00668; P07550), Orciprenaline (DB00816; P07550), Ritodrine (DB00867; P07550), Terbutaline (DB00871; P07550), Salmeterol (DB00938; P07550), Formoterol (DB00983; P07550), Salbutamol (DB01001; P07550), Arformoterol (DB01274; P07550), Fenoterol (DB01288; P07550), Pirbuterol (DB01291; P07550), Ephedrine (DB01364; P07550), P…
DB00115	Cyanocobalamin	DB09082	Vilanterol	DDI type 15	Cyanocobalamin may decrease the excretion rate of Vilanterol which could result in a higher serum level.	0.999845	0	TRUE	FALSE
DB00115	Cyanocobalamin	DB09123	Dienogest	DDI type 15	Cyanocobalamin may decrease the excretion rate of Dienogest which could result in a higher serum level.	0.997776	3	TRUE	FALSE
DB00115	Cyanocobalamin	DB09124	Medrogestone	DDI type 15	Cyanocobalamin may decrease the excretion rate of Medrogestone which could result in a higher serum level.	0.999618	0	FALSE	FALSE
DB00115	Cyanocobalamin	DB09153	Sodium chloride	DDI type 15	Cyanocobalamin may decrease the excretion rate of Sodium chloride which could result in a higher serum level.	0.999944	3	FALSE	FALSE
DB00115	Cyanocobalamin	DB09268	Picosulfuric acid	DDI type 13	The therapeutic efficacy of Picosulfuric acid can be decreased when used in combination with Cyanocobalamin.	0.99964	0	FALSE	FALSE
DB00115	Cyanocobalamin	DB09268	Picosulfuric acid	DDI type 15	Cyanocobalamin may decrease the excretion rate of Picosulfuric acid which could result in a higher serum level.	0.999967	0	TRUE	FALSE
DB00115	Cyanocobalamin	DB09286	Pipamperone	DDI type 22	Cyanocobalamin may increase the neurotoxic activities of Pipamperone.	0.998612	1	FALSE	TRUE
DB00115	Cyanocobalamin	DB09286	Pipamperone	DDI type 15	Cyanocobalamin may decrease the excretion rate of Pipamperone which could result in a higher serum level.	0.999051	1	FALSE	FALSE
DB00115	Cyanocobalamin	DB09292	Sacubitril	DDI type 15	Cyanocobalamin may decrease the excretion rate of Sacubitril which could result in a higher serum level.	0.999528	0	TRUE	FALSE
DB00115	Cyanocobalamin	DB09300	Butylscopolamine	DDI type 15	Cyanocobalamin may decrease the excretion rate of Butylscopolamine which could result in a higher serum level.	0.999699	0	FALSE	FALSE
DB00115	Cyanocobalamin	DB09449	Sodium phosphate, monobasic	DDI type 15	Cyanocobalamin may decrease the excretion rate of Sodium phosphate, monobasic which could result in a higher serum level.	0.994903	0	FALSE	FALSE
DB00115	Cyanocobalamin	DB09512	Simethicone	DDI type 26	The risk or severity of adverse effects can be increased when Cyanocobalamin is combined with Simethicone.	0.999091	0	FALSE	TRUE
DB00115	Cyanocobalamin	DB11073	Cetylpyridinium	DDI type 15	Cyanocobalamin may decrease the excretion rate of Cetylpyridinium which could result in a higher serum level.	0.999881	0	FALSE	FALSE
DB00115	Cyanocobalamin	DB11135	Selenium	DDI type 15	Cyanocobalamin may decrease the excretion rate of Selenium which could result in a higher serum level.	0.999783	4	FALSE	FALSE
DB00115	Cyanocobalamin	DB11136	Chromium	DDI type 15	Cyanocobalamin may decrease the excretion rate of Chromium which could result in a higher serum level.	0.999783	1	FALSE	FALSE
DB00115	Cyanocobalamin	DB11642	Pitolisant	DDI type 15	Cyanocobalamin may decrease the excretion rate of Pitolisant which could result in a higher serum level.	0.999563	0	TRUE	FALSE
DB00115	Cyanocobalamin	DB12016	Ponesimod	DDI type 26	The risk or severity of adverse effects can be increased when Cyanocobalamin is combined with Ponesimod.	0.998682	0	FALSE	TRUE
DB00115	Cyanocobalamin	DB12278	Propiverine	DDI type 15	Cyanocobalamin may decrease the excretion rate of Propiverine which could result in a higher serum level.	0.999942	0	TRUE	FALSE
DB00115	Cyanocobalamin	DB12310	Trehalose	DDI type 13	The therapeutic efficacy of Trehalose can be decreased when used in combination with Cyanocobalamin.	0.999599	0	FALSE	FALSE
DB00115	Cyanocobalamin	DB12371	Siponimod	DDI type 26	The risk or severity of adverse effects can be increased when Cyanocobalamin is combined with Siponimod.	0.999761	0	FALSE	TRUE
DB00115	Cyanocobalamin	DB12371	Siponimod	DDI type 15	Cyanocobalamin may decrease the excretion rate of Siponimod which could result in a higher serum level.	0.995513	0	FALSE	FALSE
DB00115	Cyanocobalamin	DB12582	Piperine	DDI type 15	Cyanocobalamin may decrease the excretion rate of Piperine which could result in a higher serum level.	0.96992	1	FALSE	FALSE
DB00115	Cyanocobalamin	DB12612	Ozanimod	DDI type 26	The risk or severity of adverse effects can be increased when Cyanocobalamin is combined with Ozanimod.	0.999752	0	FALSE	TRUE
DB00115	Cyanocobalamin	DB12612	Ozanimod	DDI type 15	Cyanocobalamin may decrease the excretion rate of Ozanimod which could result in a higher serum level.	0.999521	0	FALSE	FALSE
DB00115	Cyanocobalamin	DB12783	Benserazide	DDI type 15	Cyanocobalamin may decrease the excretion rate of Benserazide which could result in a higher serum level.	0.999903	1	TRUE	FALSE
DB00115	Cyanocobalamin	DB12930	Opipramol	DDI type 15	Cyanocobalamin may decrease the excretion rate of Opipramol which could result in a higher serum level.	0.999035	1	FALSE	FALSE
DB00115	Cyanocobalamin	DB13178	Inositol	DDI type 15	Cyanocobalamin may decrease the excretion rate of Inositol which could result in a higher serum level.	0.999794	1	FALSE	FALSE
DB00115	Cyanocobalamin	DB13324	Tetrazepam	DDI type 15	Cyanocobalamin may decrease the excretion rate of Tetrazepam which could result in a higher serum level.	0.999881	0	FALSE	FALSE
DB00115	Cyanocobalamin	DB13619	Bornaprine	DDI type 15	Cyanocobalamin may decrease the excretion rate of Bornaprine which could result in a higher serum level.	0.99934	1	FALSE	FALSE
DB00115	Cyanocobalamin	DB13642	Pridinol	DDI type 15	Cyanocobalamin may decrease the excretion rate of Pridinol which could result in a higher serum level.	0.996386	1	FALSE	FALSE
DB00115	Cyanocobalamin	DB13803	Xipamide	DDI type 15	Cyanocobalamin may decrease the excretion rate of Xipamide which could result in a higher serum level.	0.999791	0	FALSE	FALSE
DB00115	Cyanocobalamin	DB13919	Candesartan	DDI type 15	Cyanocobalamin may decrease the excretion rate of Candesartan which could result in a higher serum level.	0.985733	5	FALSE	FALSE
DB00115	Cyanocobalamin	DB13956	Estradiol valerate	DDI type 15	Cyanocobalamin may decrease the excretion rate of Estradiol valerate which could result in a higher serum level.	0.999912	1	TRUE	FALSE
DB00115	Cyanocobalamin	DB14219	Monomethyl fumarate	DDI type 26	The risk or severity of adverse effects can be increased when Cyanocobalamin is combined with Monomethyl fumarate.	0.998719	0	FALSE	TRUE
DB00115	Cyanocobalamin	DB14500	Potassium	DDI type 15	Cyanocobalamin may decrease the excretion rate of Potassium which could result in a higher serum level.	0.996912	6	FALSE	FALSE
DB00115	Cyanocobalamin	DB14509	Lithium carbonate	DDI type 15	Cyanocobalamin may decrease the excretion rate of Lithium carbonate which could result in a higher serum level.	0.999445	0	TRUE	FALSE
DB00115	Cyanocobalamin	DB14513	Magnesium	DDI type 9	The serum concentration of Magnesium can be decreased when it is combined with Cyanocobalamin.	0.997097	13	FALSE	FALSE
DB00115	Cyanocobalamin	DB14513	Magnesium	DDI type 15	Cyanocobalamin may decrease the excretion rate of Magnesium which could result in a higher serum level.	0.998088	13	FALSE	FALSE
DB00115	Cyanocobalamin	DB14634	Fluprednidene acetate	DDI type 26	The risk or severity of adverse effects can be increased when Cyanocobalamin is combined with Fluprednidene acetate.	0.999841	0	FALSE	TRUE
DB00115	Cyanocobalamin	DB14681	Cortisone	DDI type 26	The risk or severity of adverse effects can be increased when Cyanocobalamin is combined with Cortisone.	0.982305	1	FALSE	TRUE	Hydroxocobalamin (DB00200; Q99707|P22033)
DB00115	Cyanocobalamin	DB14783	Diroximel fumarate	DDI type 26	The risk or severity of adverse effects can be increased when Cyanocobalamin is combined with Diroximel fumarate.	0.999964	0	FALSE	TRUE
DB00115	Cyanocobalamin	DB14936	Menaquinone 6	DDI type 15	Cyanocobalamin may decrease the excretion rate of Menaquinone 6 which could result in a higher serum level.	0.992681	8	FALSE	FALSE
DB00115	Cyanocobalamin	DB15170	Evobrutinib	DDI type 26	The risk or severity of adverse effects can be increased when Cyanocobalamin is combined with Evobrutinib.	0.999331	0	FALSE	TRUE
DB00115	Cyanocobalamin	DB15578	Desfesoterodine	DDI type 15	Cyanocobalamin may decrease the excretion rate of Desfesoterodine which could result in a higher serum level.	0.999679	1	FALSE	FALSE
DB00115	Cyanocobalamin	DB16272	Orelabrutinib	DDI type 26	The risk or severity of adverse effects can be increased when Cyanocobalamin is combined with Orelabrutinib.	0.992673	0	FALSE	TRUE
DB00115	Cyanocobalamin	-	Tolebrutinib	DDI type 26	The risk or severity of adverse effects can be increased when Cyanocobalamin is combined with Tolebrutinib.	0.970697	0	FALSE	TRUE
DB00121	Biotin	DB00122	Choline	DDI type 15	Biotin may decrease the excretion rate of Choline which could result in a higher serum level.	0.979101	0	FALSE	FALSE
DB00121	Biotin	DB00125	Arginine	DDI type 26	The risk or severity of adverse effects can be increased when Biotin is combined with Arginine.	0.999808	0	FALSE	TRUE
DB00121	Biotin	DB00134	Methionine	DDI type 26	The risk or severity of adverse effects can be increased when Biotin is combined with Methionine.	0.999664	0	FALSE	TRUE
DB00121	Biotin	DB00137	Lutein	DDI type 26	The risk or severity of adverse effects can be increased when Biotin is combined with Lutein.	0.997494	0	FALSE	TRUE
DB00121	Biotin	DB00138	Cystine	DDI type 15	Biotin may decrease the excretion rate of Cystine which could result in a higher serum level.	0.994747	0	FALSE	FALSE
DB00121	Biotin	DB00140	Riboflavin	DDI type 15	Biotin may decrease the excretion rate of Riboflavin which could result in a higher serum level.	0.999296	3	FALSE	FALSE
DB00121	Biotin	DB00158	Folic acid	DDI type 15	Biotin may decrease the excretion rate of Folic acid which could result in a higher serum level.	0.999103	4	FALSE	FALSE
DB00121	Biotin	DB00166	Lipoic acid	DDI type 26	The risk or severity of adverse effects can be increased when Biotin is combined with Lipoic acid.	0.954898	0	FALSE	TRUE
DB00121	Biotin	DB00193	Tramadol	DDI type 15	Biotin may decrease the excretion rate of Tramadol which could result in a higher serum level.	0.981245	0	FALSE	FALSE
DB00121	Biotin	DB00222	Glimepiride	DDI type 6	The metabolism of Glimepiride can be decreased when combined with Biotin.	0.997443	0	FALSE	FALSE
DB00121	Biotin	DB00227	Lovastatin	DDI type 6	The metabolism of Lovastatin can be decreased when combined with Biotin.	0.974862	0	FALSE	FALSE
DB00121	Biotin	DB00287	Travoprost	DDI type 13	The therapeutic efficacy of Travoprost can be decreased when used in combination with Biotin.	0.998666	0	FALSE	FALSE
DB00121	Biotin	DB00304	Desogestrel	DDI type 7	The metabolism of Desogestrel can be increased when combined with Biotin.	0.998172	0	FALSE	FALSE
DB00121	Biotin	DB00331	Metformin	DDI type 15	Biotin may decrease the excretion rate of Metformin which could result in a higher serum level.	0.99812	0	FALSE	FALSE
DB00121	Biotin	DB00341	Cetirizine	DDI type 15	Biotin may decrease the excretion rate of Cetirizine which could result in a higher serum level.	0.940449	0	FALSE	FALSE
DB00121	Biotin	DB00367	Levonorgestrel	DDI type 7	The metabolism of Levonorgestrel can be increased when combined with Biotin.	0.995159	1	FALSE	FALSE
DB00121	Biotin	DB00378	Dydrogesterone	DDI type 7	The metabolism of Dydrogesterone can be increased when combined with Biotin.	0.991234	0	FALSE	FALSE
DB00121	Biotin	DB00391	Sulpiride	DDI type 26	The risk or severity of adverse effects can be increased when Biotin is combined with Sulpiride.	0.999804	0	FALSE	TRUE		Clozapine (DB00363; P14416), Loxapine (DB00408; P14416), Promazine (DB00420; P14416), Chlorpromazine (DB00477; P14416), Buspirone (DB00490; P14416), Haloperidol (DB00502; P14416), Triflupromazine (DB00508; P14416), Trifluoperazine (DB00831; P14416), Pimozide (DB01100; P14416), Quetiapine (DB01224; P14416), Metoclopramide (DB01233; P14416), Chlorprothixene (DB01239; P14416), Methotrimeprazine (DB0…
DB00121	Biotin	DB00440	Trimethoprim	DDI type 15	Biotin may decrease the excretion rate of Trimethoprim which could result in a higher serum level.	0.945769	0	FALSE	FALSE
DB00121	Biotin	DB00496	Darifenacin	DDI type 54	Biotin may increase the central nervous system depressant (CNS depressant) activities of Darifenacin.	0.962177	0	FALSE	FALSE
DB00121	Biotin	DB00537	Ciprofloxacin	DDI type 6	The metabolism of Ciprofloxacin can be decreased when combined with Biotin.	0.947759	0	FALSE	FALSE
DB00121	Biotin	DB00563	Methotrexate	DDI type 15	Biotin may decrease the excretion rate of Methotrexate which could result in a higher serum level.	0.995856	0	FALSE	FALSE
DB00121	Biotin	DB00564	Carbamazepine	DDI type 26	The risk or severity of adverse effects can be increased when Biotin is combined with Carbamazepine.	0.996698	0	FALSE	TRUE
DB00121	Biotin	DB00581	Lactulose	DDI type 13	The therapeutic efficacy of Lactulose can be decreased when used in combination with Biotin.	0.957203	0	FALSE	FALSE
DB00121	Biotin	DB00583	Levocarnitine	DDI type 15	Biotin may decrease the excretion rate of Levocarnitine which could result in a higher serum level.	0.99945	0	FALSE	FALSE
DB00121	Biotin	DB00588	Fluticasone propionate	DDI type 26	The risk or severity of adverse effects can be increased when Biotin is combined with Fluticasone propionate.	0.992558	0	FALSE	TRUE		Prednisone (DB00635; P04150), Dexamethasone acetate (DB14649; P04150)
DB00121	Biotin	DB00603	Medroxyprogesterone acetate	DDI type 15	Biotin may decrease the excretion rate of Medroxyprogesterone acetate which could result in a higher serum level.	0.961272	0	FALSE	FALSE
DB00121	Biotin	DB00635	Prednisone	DDI type 15	Biotin may decrease the excretion rate of Prednisone which could result in a higher serum level.	0.97333	1	FALSE	FALSE
DB00121	Biotin	DB00641	Simvastatin	DDI type 6	The metabolism of Simvastatin can be decreased when combined with Biotin.	0.960068	0	FALSE	FALSE
DB00121	Biotin	DB00654	Latanoprost	DDI type 13	The therapeutic efficacy of Latanoprost can be decreased when used in combination with Biotin.	0.993427	0	FALSE	FALSE
DB00121	Biotin	DB00656	Trazodone	DDI type 26	The risk or severity of adverse effects can be increased when Biotin is combined with Trazodone.	0.994411	0	FALSE	TRUE
DB00121	Biotin	DB00687	Fludrocortisone	DDI type 26	The risk or severity of adverse effects can be increased when Biotin is combined with Fludrocortisone.	0.969225	0	FALSE	TRUE
DB00121	Biotin	DB00697	Tizanidine	DDI type 26	The risk or severity of adverse effects can be increased when Biotin is combined with Tizanidine.	0.999875	1	FALSE	TRUE
DB00121	Biotin	DB00717	Norethisterone	DDI type 7	The metabolism of Norethisterone can be increased when combined with Biotin.	0.998386	0	FALSE	FALSE
DB00121	Biotin	DB00722	Lisinopril	DDI type 15	Biotin may decrease the excretion rate of Lisinopril which could result in a higher serum level.	0.982677	0	FALSE	FALSE
DB00121	Biotin	DB00763	Methimazole	DDI type 15	Biotin may decrease the excretion rate of Methimazole which could result in a higher serum level.	0.996652	0	FALSE	FALSE
DB00121	Biotin	DB00764	Mometasone	DDI type 26	The risk or severity of adverse effects can be increased when Biotin is combined with Mometasone.	0.998544	0	FALSE	TRUE
DB00121	Biotin	DB00790	Perindopril	DDI type 15	Biotin may decrease the excretion rate of Perindopril which could result in a higher serum level.	0.996926	0	FALSE	FALSE
DB00121	Biotin	DB00863	Ranitidine	DDI type 15	Biotin may decrease the excretion rate of Ranitidine which could result in a higher serum level.	0.999891	1	FALSE	FALSE
DB00121	Biotin	DB00905	Bimatoprost	DDI type 13	The therapeutic efficacy of Bimatoprost can be decreased when used in combination with Biotin.	0.999733	0	FALSE	FALSE
DB00121	Biotin	DB00946	Phenprocoumon	DDI type 27	The risk or severity of bleeding can be increased when Biotin is combined with Phenprocoumon.	0.998152	0	FALSE	TRUE
DB00121	Biotin	DB00951	Isoniazid	DDI type 15	Biotin may decrease the excretion rate of Isoniazid which could result in a higher serum level.	0.99985	0	FALSE	FALSE
DB00121	Biotin	DB00952	Naratriptan	DDI type 26	The risk or severity of adverse effects can be increased when Biotin is combined with Naratriptan.	0.991524	0	FALSE	TRUE
DB00121	Biotin	DB00957	Norgestimate	DDI type 7	The metabolism of Norgestimate can be increased when combined with Biotin.	0.995166	0	FALSE	FALSE
DB00121	Biotin	DB00959	Methylprednisolone	DDI type 26	The risk or severity of adverse effects can be increased when Biotin is combined with Methylprednisolone.	0.982336	2	FALSE	TRUE		Prednisone (DB00635; P04150), Dexamethasone acetate (DB14649; P04150)
DB00121	Biotin	DB00967	Desloratadine	DDI type 26	The risk or severity of adverse effects can be increased when Biotin is combined with Desloratadine.	0.962643	0	FALSE	TRUE		Cetirizine (DB00341; P35367), Terfenadine (DB00342; P35367), Buclizine (DB00354; P35367), Doxylamine (DB00366; P35367), Loratadine (DB00455; P35367), Chlorpromazine (DB00477; P35367), Astemizole (DB00637; P35367), Azatadine (DB00719; P35367), Olopatadine (DB00768; P35367), Propiomazine (DB00777; P35367), Ketotifen (DB00920; P35367), Fexofenadine (DB00950; P35367), Promethazine (DB01069; P35367), …
DB00121	Biotin	DB00996	Gabapentin	DDI type 26	The risk or severity of adverse effects can be increased when Biotin is combined with Gabapentin.	0.998623	0	FALSE	TRUE		Nicardipine (DB00622; P54289)
DB00121	Biotin	DB01001	Salbutamol	DDI type 15	Biotin may decrease the excretion rate of Salbutamol which could result in a higher serum level.	0.994559	0	FALSE	FALSE
DB00121	Biotin	DB01065	Melatonin	DDI type 26	The risk or severity of adverse effects can be increased when Biotin is combined with Melatonin.	0.999537	0	FALSE	TRUE		Tasimelteon (DB09071; P48039|P49286)
DB00121	Biotin	DB01068	Clonazepam	DDI type 15	Biotin may decrease the excretion rate of Clonazepam which could result in a higher serum level.	0.986708	0	FALSE	FALSE
DB00121	Biotin	DB01076	Atorvastatin	DDI type 6	The metabolism of Atorvastatin can be decreased when combined with Biotin.	0.999623	0	FALSE	FALSE
DB00121	Biotin	DB01086	Benzocaine	DDI type 26	The risk or severity of adverse effects can be increased when Biotin is combined with Benzocaine.	0.999682	0	FALSE	TRUE		Lidocaine (DB00281; Q9Y5Y9), Cinchocaine (DB00527; Q9Y5Y9), Proparacaine (DB00807; Q9Y5Y9), Mepivacaine (DB00961; Q9Y5Y9)
DB00121	Biotin	DB01097	Leflunomide	DDI type 26	The risk or severity of adverse effects can be increased when Biotin is combined with Leflunomide.	0.96673	0	FALSE	TRUE
DB00121	Biotin	DB01114	Chlorpheniramine	DDI type 32	The risk or severity of QTc prolongation can be increased when Biotin is combined with Chlorpheniramine.	0.97982	0	FALSE	TRUE		Cetirizine (DB00341; P35367), Terfenadine (DB00342; P35367), Buclizine (DB00354; P35367), Doxylamine (DB00366; P35367), Loratadine (DB00455; P35367), Chlorpromazine (DB00477; P35367), Astemizole (DB00637; P35367), Azatadine (DB00719; P35367), Olopatadine (DB00768; P35367), Propiomazine (DB00777; P35367), Ketotifen (DB00920; P35367), Fexofenadine (DB00950; P35367), Promethazine (DB01069; P35367), …
DB00121	Biotin	DB01137	Levofloxacin	DDI type 15	Biotin may decrease the excretion rate of Levofloxacin which could result in a higher serum level.	0.986788	0	FALSE	FALSE
DB00121	Biotin	DB01142	Doxepin	DDI type 15	Biotin may decrease the excretion rate of Doxepin which could result in a higher serum level.	0.989341	0	FALSE	FALSE
DB00121	Biotin	DB01183	Naloxone	DDI type 15	Biotin may decrease the excretion rate of Naloxone which could result in a higher serum level.	0.955231	0	FALSE	FALSE
DB00121	Biotin	DB01198	Zopiclone	DDI type 26	The risk or severity of adverse effects can be increased when Biotin is combined with Zopiclone.	0.975773	1	FALSE	TRUE		Pentobarbital (DB00312; P14867|P47869|P34903|P31644), Methylphenobarbital (DB00849; P14867|P47869|P34903|P31644), Amobarbital (DB01351; P14867|P47869|P34903|P31644)
DB00121	Biotin	DB01202	Levetiracetam	DDI type 26	The risk or severity of adverse effects can be increased when Biotin is combined with Levetiracetam.	0.988365	1	FALSE	TRUE
DB00121	Biotin	DB01261	Sitagliptin	DDI type 6	The metabolism of Sitagliptin can be decreased when combined with Biotin.	0.996796	0	FALSE	FALSE
DB00121	Biotin	DB01373	Calcium	DDI type 15	Biotin may decrease the excretion rate of Calcium which could result in a higher serum level.	0.986901	0	FALSE	FALSE
DB00121	Biotin	DB01409	Tiotropium	DDI type 15	Biotin may decrease the excretion rate of Tiotropium which could result in a higher serum level.	0.997048	0	FALSE	FALSE
DB00121	Biotin	DB01422	Nitroxoline	DDI type 15	Biotin may decrease the excretion rate of Nitroxoline which could result in a higher serum level.	0.99779	0	FALSE	FALSE
DB00121	Biotin	DB01591	Solifenacin	DDI type 26	The risk or severity of adverse effects can be increased when Biotin is combined with Solifenacin.	0.967403	2	FALSE	TRUE		Oxyphencyclimine (DB00383; P20309), Procyclidine (DB00387; P20309), Anisotropine methylbromide (DB00517; P20309), Homatropine methylbromide (DB00725; P20309), Scopolamine (DB00747; P20309), Glycopyrronium (DB00986; P20309), Tolterodine (DB01036; P20309), Oxybutynin (DB01062; P20309), Tiotropium (DB01409; P20309), Mepenzolate (DB04843; P20309), Fesoterodine (DB06702; P20309), Hexocyclium (DB06787;…
DB00121	Biotin	DB01592	Iron	DDI type 15	Biotin may decrease the excretion rate of Iron which could result in a higher serum level.	0.987422	1	FALSE	FALSE
DB00121	Biotin	DB01593	Zinc	DDI type 15	Biotin may decrease the excretion rate of Zinc which could result in a higher serum level.	0.987422	3	FALSE	FALSE
DB00121	Biotin	DB01611	Hydroxychloroquine	DDI type 26	The risk or severity of adverse effects can be increased when Biotin is combined with Hydroxychloroquine.	0.998261	0	FALSE	TRUE
DB00121	Biotin	DB01698	Rutin	DDI type 26	The risk or severity of adverse effects can be increased when Biotin is combined with Rutin.	0.981278	1	FALSE	TRUE
DB00121	Biotin	DB01783	Pantothenic acid	DDI type 13	The therapeutic efficacy of Pantothenic acid can be decreased when used in combination with Biotin.	0.980399	3	FALSE	FALSE
DB00121	Biotin	DB01783	Pantothenic acid	DDI type 15	Biotin may decrease the excretion rate of Pantothenic acid which could result in a higher serum level.	0.995555	3	FALSE	FALSE
DB00121	Biotin	DB04398	Lactic acid	DDI type 26	The risk or severity of adverse effects can be increased when Biotin is combined with Lactic acid.	0.954594	0	FALSE	TRUE
DB00121	Biotin	DB04703	Hesperidin	DDI type 26	The risk or severity of adverse effects can be increased when Biotin is combined with Hesperidin.	0.99623	1	FALSE	TRUE
DB00121	Biotin	DB04896	Milnacipran	DDI type 15	Biotin may decrease the excretion rate of Milnacipran which could result in a higher serum level.	0.999215	0	FALSE	FALSE
DB00121	Biotin	DB05271	Rotigotine	DDI type 78	Biotin may increase the sedative activities of Rotigotine.	0.962611	1	FALSE	FALSE
DB00121	Biotin	DB05382	Iodine	DDI type 15	Biotin may decrease the excretion rate of Iodine which could result in a higher serum level.	0.985764	1	FALSE	FALSE
DB00121	Biotin	DB05541	Brivaracetam	DDI type 15	Biotin may decrease the excretion rate of Brivaracetam which could result in a higher serum level.	0.997042	0	FALSE	FALSE
DB00121	Biotin	DB06148	Mianserin	DDI type 26	The risk or severity of adverse effects can be increased when Biotin is combined with Mianserin.	0.985388	0	FALSE	TRUE
DB00121	Biotin	DB06151	Acetylcysteine	DDI type 15	Biotin may decrease the excretion rate of Acetylcysteine which could result in a higher serum level.	0.993095	0	FALSE	FALSE
DB00121	Biotin	DB06264	Tolperisone	DDI type 26	The risk or severity of adverse effects can be increased when Biotin is combined with Tolperisone.	0.999808	0	FALSE	TRUE
DB00121	Biotin	DB06594	Agomelatine	DDI type 26	The risk or severity of adverse effects can be increased when Biotin is combined with Agomelatine.	0.995711	0	FALSE	TRUE
DB00121	Biotin	DB06605	Apixaban	DDI type 26	The risk or severity of adverse effects can be increased when Biotin is combined with Apixaban.	0.999504	0	FALSE	TRUE		Heparin (DB01109; P00742), Enoxaparin (DB01225; P00742), Edoxaban (DB09075; P00742), Antithrombin Alfa (DB11166; P00742)
DB00121	Biotin	DB06623	Flupirtine	DDI type 15	Biotin may decrease the excretion rate of Flupirtine which could result in a higher serum level.	0.999897	0	FALSE	FALSE
DB00121	Biotin	DB06637	Dalfampridine	DDI type 15	Biotin may decrease the excretion rate of Dalfampridine which could result in a higher serum level.	0.999895	0	FALSE	FALSE
DB00121	Biotin	DB06698	Betahistine	DDI type 26	The risk or severity of adverse effects can be increased when Biotin is combined with Betahistine.	0.999858	0	FALSE	TRUE
DB00121	Biotin	DB06755	Beta carotene	DDI type 26	The risk or severity of adverse effects can be increased when Biotin is combined with Beta carotene.	0.994278	0	FALSE	TRUE		Tocopherol (DB11251; Free radicals), alpha-Tocopherol acetate (DB14003; Free radicals)
DB00121	Biotin	DB08868	Fingolimod	DDI type 69	Biotin may increase the immunosuppressive activities of Fingolimod.	0.984939	2	FALSE	FALSE
DB00121	Biotin	DB08868	Fingolimod	DDI type 6	The metabolism of Fingolimod can be decreased when combined with Biotin.	0.992954	2	FALSE	FALSE
DB00121	Biotin	DB08893	Mirabegron	DDI type 15	Biotin may decrease the excretion rate of Mirabegron which could result in a higher serum level.	0.996899	0	FALSE	FALSE
DB00121	Biotin	DB08906	Fluticasone furoate	DDI type 26	The risk or severity of adverse effects can be increased when Biotin is combined with Fluticasone furoate.	0.999953	0	FALSE	TRUE		Prednisone (DB00635; P04150), Dexamethasone acetate (DB14649; P04150)
DB00121	Biotin	DB08908	Dimethyl fumarate	DDI type 26	The risk or severity of adverse effects can be increased when Biotin is combined with Dimethyl fumarate.	0.999106	0	FALSE	TRUE
DB00121	Biotin	DB09020	Bisacodyl	DDI type 13	The therapeutic efficacy of Bisacodyl can be decreased when used in combination with Biotin.	0.986915	0	FALSE	FALSE
DB00121	Biotin	DB09020	Bisacodyl	DDI type 6	The metabolism of Bisacodyl can be decreased when combined with Biotin.	0.949224	0	FALSE	FALSE
DB00121	Biotin	DB09123	Dienogest	DDI type 15	Biotin may decrease the excretion rate of Dienogest which could result in a higher serum level.	0.998385	0	FALSE	FALSE
DB00121	Biotin	DB09124	Medrogestone	DDI type 15	Biotin may decrease the excretion rate of Medrogestone which could result in a higher serum level.	0.988673	0	FALSE	FALSE
DB00121	Biotin	DB09153	Sodium chloride	DDI type 15	Biotin may decrease the excretion rate of Sodium chloride which could result in a higher serum level.	0.999488	1	FALSE	FALSE
DB00121	Biotin	DB09268	Picosulfuric acid	DDI type 15	Biotin may decrease the excretion rate of Picosulfuric acid which could result in a higher serum level.	0.97731	0	FALSE	FALSE
DB00121	Biotin	DB09286	Pipamperone	DDI type 26	The risk or severity of adverse effects can be increased when Biotin is combined with Pipamperone.	0.999033	1	FALSE	TRUE
DB00121	Biotin	DB09289	Tianeptine	DDI type 26	The risk or severity of adverse effects can be increased when Biotin is combined with Tianeptine.	0.987186	0	FALSE	TRUE
DB00121	Biotin	DB09292	Sacubitril	DDI type 15	Biotin may decrease the excretion rate of Sacubitril which could result in a higher serum level.	0.999732	0	FALSE	FALSE
DB00121	Biotin	DB09449	Sodium phosphate, monobasic	DDI type 26	The risk or severity of adverse effects can be increased when Biotin is combined with Sodium phosphate, monobasic.	0.996224	0	FALSE	TRUE
DB00121	Biotin	DB11135	Selenium	DDI type 15	Biotin may decrease the excretion rate of Selenium which could result in a higher serum level.	0.987422	1	FALSE	FALSE
DB00121	Biotin	DB11136	Chromium	DDI type 15	Biotin may decrease the excretion rate of Chromium which could result in a higher serum level.	0.987422	1	FALSE	FALSE
DB00121	Biotin	DB12278	Propiverine	DDI type 15	Biotin may decrease the excretion rate of Propiverine which could result in a higher serum level.	0.978382	0	FALSE	FALSE
DB00121	Biotin	DB12371	Siponimod	DDI type 26	The risk or severity of adverse effects can be increased when Biotin is combined with Siponimod.	0.992712	0	FALSE	TRUE
DB00121	Biotin	DB12582	Piperine	DDI type 26	The risk or severity of adverse effects can be increased when Biotin is combined with Piperine.	0.9986	1	FALSE	TRUE
DB00121	Biotin	DB12612	Ozanimod	DDI type 6	The metabolism of Ozanimod can be decreased when combined with Biotin.	0.995561	0	FALSE	FALSE
DB00121	Biotin	DB12661	Urapidil	DDI type 26	The risk or severity of adverse effects can be increased when Biotin is combined with Urapidil.	0.999011	0	FALSE	TRUE
DB00121	Biotin	DB12783	Benserazide	DDI type 15	Biotin may decrease the excretion rate of Benserazide which could result in a higher serum level.	0.997029	1	FALSE	FALSE
DB00121	Biotin	DB12930	Opipramol	DDI type 26	The risk or severity of adverse effects can be increased when Biotin is combined with Opipramol.	0.999211	0	FALSE	TRUE
DB00121	Biotin	DB13178	Inositol	DDI type 15	Biotin may decrease the excretion rate of Inositol which could result in a higher serum level.	0.997422	0	FALSE	FALSE
DB00121	Biotin	DB13528	Chlormadinone	DDI type 7	The metabolism of Chlormadinone can be increased when combined with Biotin.	0.992159	0	FALSE	FALSE
DB00121	Biotin	DB13619	Bornaprine	DDI type 15	Biotin may decrease the excretion rate of Bornaprine which could result in a higher serum level.	0.998079	0	FALSE	FALSE
DB00121	Biotin	DB13919	Candesartan	DDI type 6	The metabolism of Candesartan can be decreased when combined with Biotin.	0.988585	0	FALSE	FALSE
DB00121	Biotin	DB13956	Estradiol valerate	DDI type 7	The metabolism of Estradiol valerate can be increased when combined with Biotin.	0.992908	0	FALSE	FALSE
DB00121	Biotin	DB14219	Monomethyl fumarate	DDI type 26	The risk or severity of adverse effects can be increased when Biotin is combined with Monomethyl fumarate.	0.998824	0	FALSE	TRUE
DB00121	Biotin	DB14509	Lithium carbonate	DDI type 26	The risk or severity of adverse effects can be increased when Biotin is combined with Lithium carbonate.	0.969742	0	FALSE	TRUE
DB00121	Biotin	DB14513	Magnesium	DDI type 9	The serum concentration of Magnesium can be decreased when it is combined with Biotin.	0.964145	0	FALSE	FALSE
DB00121	Biotin	DB14634	Fluprednidene acetate	DDI type 26	The risk or severity of adverse effects can be increased when Biotin is combined with Fluprednidene acetate.	0.999598	0	FALSE	TRUE
DB00121	Biotin	DB14681	Cortisone	DDI type 15	Biotin may decrease the excretion rate of Cortisone which could result in a higher serum level.	0.967994	0	FALSE	FALSE
DB00121	Biotin	DB14783	Diroximel fumarate	DDI type 26	The risk or severity of adverse effects can be increased when Biotin is combined with Diroximel fumarate.	0.999841	0	FALSE	TRUE
DB00121	Biotin	DB14785	Fenebrutinib	DDI type 6	The metabolism of Fenebrutinib can be decreased when combined with Biotin.	0.98954	0	FALSE	FALSE
DB00121	Biotin	DB15170	Evobrutinib	DDI type 26	The risk or severity of adverse effects can be increased when Biotin is combined with Evobrutinib.	0.99981	0	FALSE	TRUE
DB00121	Biotin	DB15170	Evobrutinib	DDI type 6	The metabolism of Evobrutinib can be decreased when combined with Biotin.	0.990994	0	FALSE	FALSE
DB00121	Biotin	DB15578	Desfesoterodine	DDI type 15	Biotin may decrease the excretion rate of Desfesoterodine which could result in a higher serum level.	0.974096	0	FALSE	FALSE
DB00121	Biotin	DB16272	Orelabrutinib	DDI type 26	The risk or severity of adverse effects can be increased when Biotin is combined with Orelabrutinib.	0.999911	0	FALSE	TRUE
DB00121	Biotin	-	Tolebrutinib	DDI type 26	The risk or severity of adverse effects can be increased when Biotin is combined with Tolebrutinib.	0.999945	0	FALSE	TRUE
DB00121	Biotin	-	Tolebrutinib	DDI type 6	The metabolism of Tolebrutinib can be decreased when combined with Biotin.	0.969164	0	FALSE	FALSE
DB00122	Choline	DB00125	Arginine	DDI type 26	The risk or severity of adverse effects can be increased when Choline is combined with Arginine.	0.968926	0	FALSE	TRUE
DB00122	Choline	DB00126	Ascorbic acid	DDI type 15	Choline may decrease the excretion rate of Ascorbic acid which could result in a higher serum level.	0.995866	0	FALSE	FALSE
DB00122	Choline	DB00134	Methionine	DDI type 26	The risk or severity of adverse effects can be increased when Choline is combined with Methionine.	0.959336	0	FALSE	TRUE
DB00122	Choline	DB00138	Cystine	DDI type 15	Choline may decrease the excretion rate of Cystine which could result in a higher serum level.	0.994451	0	FALSE	FALSE
DB00122	Choline	DB00140	Riboflavin	DDI type 15	Choline may decrease the excretion rate of Riboflavin which could result in a higher serum level.	0.985583	0	FALSE	FALSE
DB00122	Choline	DB00162	Vitamin A	DDI type 15	Choline may decrease the excretion rate of Vitamin A which could result in a higher serum level.	0.994927	0	FALSE	FALSE
DB00122	Choline	DB00175	Pravastatin	DDI type 15	Choline may decrease the excretion rate of Pravastatin which could result in a higher serum level.	0.998985	0	FALSE	FALSE
DB00122	Choline	DB00177	Valsartan	DDI type 15	Choline may decrease the excretion rate of Valsartan which could result in a higher serum level.	0.993349	0	FALSE	FALSE
DB00122	Choline	DB00196	Fluconazole	DDI type 15	Choline may decrease the excretion rate of Fluconazole which could result in a higher serum level.	0.984035	0	FALSE	FALSE
DB00122	Choline	DB00222	Glimepiride	DDI type 15	Choline may decrease the excretion rate of Glimepiride which could result in a higher serum level.	0.997896	0	FALSE	FALSE
DB00122	Choline	DB00318	Codeine	DDI type 26	The risk or severity of adverse effects can be increased when Choline is combined with Codeine.	0.99519	0	TRUE	TRUE
DB00122	Choline	DB00378	Dydrogesterone	DDI type 15	Choline may decrease the excretion rate of Dydrogesterone which could result in a higher serum level.	0.983838	0	FALSE	FALSE
DB00122	Choline	DB00396	Progesterone	DDI type 15	Choline may decrease the excretion rate of Progesterone which could result in a higher serum level.	0.976626	0	FALSE	FALSE
DB00122	Choline	DB00399	Zoledronic acid	DDI type 15	Choline may decrease the excretion rate of Zoledronic acid which could result in a higher serum level.	0.994435	0	FALSE	FALSE
DB00122	Choline	DB00413	Pramipexole	DDI type 10	The serum concentration of Pramipexole can be increased when it is combined with Choline.	0.991634	0	TRUE	FALSE
DB00122	Choline	DB00421	Spironolactone	DDI type 15	Choline may decrease the excretion rate of Spironolactone which could result in a higher serum level.	0.974112	0	FALSE	FALSE
DB00122	Choline	DB00437	Allopurinol	DDI type 15	Choline may decrease the excretion rate of Allopurinol which could result in a higher serum level.	0.991112	0	FALSE	FALSE
DB00122	Choline	DB00476	Duloxetine	DDI type 15	Choline may decrease the excretion rate of Duloxetine which could result in a higher serum level.	0.970095	1	FALSE	FALSE
DB00122	Choline	DB00529	Foscarnet	DDI type 15	Choline may decrease the excretion rate of Foscarnet which could result in a higher serum level.	0.974836	0	FALSE	FALSE
DB00122	Choline	DB00564	Carbamazepine	DDI type 15	Choline may decrease the excretion rate of Carbamazepine which could result in a higher serum level.	0.992492	0	FALSE	FALSE
DB00122	Choline	DB00583	Levocarnitine	DDI type 15	Choline may decrease the excretion rate of Levocarnitine which could result in a higher serum level.	0.957076	0	FALSE	FALSE
DB00122	Choline	DB00627	Niacin	DDI type 15	Choline may decrease the excretion rate of Niacin which could result in a higher serum level.	0.958228	0	FALSE	FALSE
DB00122	Choline	DB00630	Alendronic acid	DDI type 15	Choline may decrease the excretion rate of Alendronic acid which could result in a higher serum level.	0.983008	0	FALSE	FALSE
DB00122	Choline	DB00710	Ibandronate	DDI type 15	Choline may decrease the excretion rate of Ibandronate which could result in a higher serum level.	0.998971	0	FALSE	FALSE
DB00122	Choline	DB00722	Lisinopril	DDI type 15	Choline may decrease the excretion rate of Lisinopril which could result in a higher serum level.	0.985736	0	FALSE	FALSE
DB00122	Choline	DB00745	Modafinil	DDI type 15	Choline may decrease the excretion rate of Modafinil which could result in a higher serum level.	0.968526	0	FALSE	FALSE
DB00122	Choline	DB00758	Clopidogrel	DDI type 15	Choline may decrease the excretion rate of Clopidogrel which could result in a higher serum level.	0.981597	0	FALSE	FALSE
DB00122	Choline	DB00787	Acyclovir	DDI type 26	The risk or severity of adverse effects can be increased when Choline is combined with Acyclovir.	0.957692	0	TRUE	TRUE
DB00122	Choline	DB00790	Perindopril	DDI type 15	Choline may decrease the excretion rate of Perindopril which could result in a higher serum level.	0.941319	0	FALSE	FALSE
DB00122	Choline	DB00863	Ranitidine	DDI type 10	The serum concentration of Ranitidine can be increased when it is combined with Choline.	0.96961	0	TRUE	FALSE
DB00122	Choline	DB00876	Eprosartan	DDI type 15	Choline may decrease the excretion rate of Eprosartan which could result in a higher serum level.	0.992612	0	FALSE	FALSE
DB00122	Choline	DB00884	Risedronic acid	DDI type 15	Choline may decrease the excretion rate of Risedronic acid which could result in a higher serum level.	0.99956	0	FALSE	FALSE
DB00122	Choline	DB00915	Amantadine	DDI type 10	The serum concentration of Amantadine can be increased when it is combined with Choline.	0.996715	0	TRUE	FALSE
DB00122	Choline	DB00938	Salmeterol	DDI type 15	Choline may decrease the excretion rate of Salmeterol which could result in a higher serum level.	0.972491	0	FALSE	FALSE
DB00122	Choline	DB00946	Phenprocoumon	DDI type 14	The therapeutic efficacy of Phenprocoumon can be increased when used in combination with Choline.	0.986408	0	FALSE	FALSE
DB00122	Choline	DB00957	Norgestimate	DDI type 15	Choline may decrease the excretion rate of Norgestimate which could result in a higher serum level.	0.962872	0	FALSE	FALSE
DB00122	Choline	DB01019	Bethanechol	DDI type 26	The risk or severity of adverse effects can be increased when Choline is combined with Bethanechol.	0.988636	0	FALSE	TRUE		Cevimeline (DB00185; P20309)
DB00122	Choline	DB01039	Fenofibrate	DDI type 15	Choline may decrease the excretion rate of Fenofibrate which could result in a higher serum level.	0.999765	0	FALSE	FALSE
DB00122	Choline	DB01043	Memantine	DDI type 10	The serum concentration of Memantine can be increased when it is combined with Choline.	0.980834	0	TRUE	FALSE
DB00122	Choline	DB01050	Ibuprofen	DDI type 15	Choline may decrease the excretion rate of Ibuprofen which could result in a higher serum level.	0.963157	0	FALSE	FALSE
DB00122	Choline	DB01075	Diphenhydramine	DDI type 15	Choline may decrease the excretion rate of Diphenhydramine which could result in a higher serum level.	0.978655	0	FALSE	FALSE
DB00122	Choline	DB01076	Atorvastatin	DDI type 15	Choline may decrease the excretion rate of Atorvastatin which could result in a higher serum level.	0.971844	0	FALSE	FALSE
DB00122	Choline	DB01098	Rosuvastatin	DDI type 15	Choline may decrease the excretion rate of Rosuvastatin which could result in a higher serum level.	0.999575	0	FALSE	FALSE
DB00122	Choline	DB01162	Terazosin	DDI type 26	The risk or severity of adverse effects can be increased when Choline is combined with Terazosin.	0.999698	0	FALSE	TRUE
DB00122	Choline	DB01197	Captopril	DDI type 15	Choline may decrease the excretion rate of Captopril which could result in a higher serum level.	0.997271	0	FALSE	FALSE
DB00122	Choline	DB01204	Mitoxantrone	DDI type 26	The risk or severity of adverse effects can be increased when Choline is combined with Mitoxantrone.	0.999011	0	FALSE	TRUE
DB00122	Choline	DB01373	Calcium	DDI type 15	Choline may decrease the excretion rate of Calcium which could result in a higher serum level.	0.992268	0	FALSE	FALSE
DB00122	Choline	DB01390	Sodium bicarbonate	DDI type 15	Choline may decrease the excretion rate of Sodium bicarbonate which could result in a higher serum level.	0.996946	1	FALSE	FALSE
DB00122	Choline	DB01422	Nitroxoline	DDI type 15	Choline may decrease the excretion rate of Nitroxoline which could result in a higher serum level.	0.993816	0	FALSE	FALSE
DB00122	Choline	DB01586	Ursodeoxycholic acid	DDI type 15	Choline may decrease the excretion rate of Ursodeoxycholic acid which could result in a higher serum level.	0.998991	0	FALSE	FALSE
DB00122	Choline	DB01592	Iron	DDI type 15	Choline may decrease the excretion rate of Iron which could result in a higher serum level.	0.992323	0	FALSE	FALSE
DB00122	Choline	DB01593	Zinc	DDI type 15	Choline may decrease the excretion rate of Zinc which could result in a higher serum level.	0.992323	0	FALSE	FALSE
DB00122	Choline	DB01698	Rutin	DDI type 26	The risk or severity of adverse effects can be increased when Choline is combined with Rutin.	0.99838	0	FALSE	TRUE
DB00122	Choline	DB01783	Pantothenic acid	DDI type 15	Choline may decrease the excretion rate of Pantothenic acid which could result in a higher serum level.	0.997296	0	FALSE	FALSE
DB00122	Choline	DB03766	Propanoic acid	DDI type 15	Choline may decrease the excretion rate of Propanoic acid which could result in a higher serum level.	0.969612	0	FALSE	FALSE
DB00122	Choline	DB04398	Lactic acid	DDI type 15	Choline may decrease the excretion rate of Lactic acid which could result in a higher serum level.	0.989434	0	FALSE	FALSE
DB00122	Choline	DB04703	Hesperidin	DDI type 26	The risk or severity of adverse effects can be increased when Choline is combined with Hesperidin.	0.996325	0	FALSE	TRUE
DB00122	Choline	DB05382	Iodine	DDI type 15	Choline may decrease the excretion rate of Iodine which could result in a higher serum level.	0.990592	0	FALSE	FALSE
DB00122	Choline	DB05541	Brivaracetam	DDI type 15	Choline may decrease the excretion rate of Brivaracetam which could result in a higher serum level.	0.949918	0	FALSE	FALSE
DB00122	Choline	DB06151	Acetylcysteine	DDI type 15	Choline may decrease the excretion rate of Acetylcysteine which could result in a higher serum level.	0.998937	0	FALSE	FALSE
DB00122	Choline	DB06605	Apixaban	DDI type 26	The risk or severity of adverse effects can be increased when Choline is combined with Apixaban.	0.967796	0	FALSE	TRUE		Fondaparinux (DB00569; P00742), Heparin (DB01109; P00742), Enoxaparin (DB01225; P00742), Edoxaban (DB09075; P00742), Antithrombin Alfa (DB11166; P00742)
DB00122	Choline	DB06623	Flupirtine	DDI type 15	Choline may decrease the excretion rate of Flupirtine which could result in a higher serum level.	0.99932	0	FALSE	FALSE
DB00122	Choline	DB06637	Dalfampridine	DDI type 10	The serum concentration of Dalfampridine can be increased when it is combined with Choline.	0.996116	0	TRUE	FALSE
DB00122	Choline	DB08818	Hyaluronic acid	DDI type 15	Choline may decrease the excretion rate of Hyaluronic acid which could result in a higher serum level.	0.998042	0	FALSE	FALSE
DB00122	Choline	DB08893	Mirabegron	DDI type 15	Choline may decrease the excretion rate of Mirabegron which could result in a higher serum level.	0.951678	0	FALSE	FALSE
DB00122	Choline	DB08908	Dimethyl fumarate	DDI type 15	Choline may decrease the excretion rate of Dimethyl fumarate which could result in a higher serum level.	0.961294	1	FALSE	FALSE
DB00122	Choline	DB09020	Bisacodyl	DDI type 13	The therapeutic efficacy of Bisacodyl can be decreased when used in combination with Choline.	0.967443	0	FALSE	FALSE
DB00122	Choline	DB09020	Bisacodyl	DDI type 15	Choline may decrease the excretion rate of Bisacodyl which could result in a higher serum level.	0.989586	0	FALSE	FALSE
DB00122	Choline	DB09070	Tibolone	DDI type 15	Choline may decrease the excretion rate of Tibolone which could result in a higher serum level.	0.971129	0	FALSE	FALSE
DB00122	Choline	DB09082	Vilanterol	DDI type 15	Choline may decrease the excretion rate of Vilanterol which could result in a higher serum level.	0.98086	0	FALSE	FALSE
DB00122	Choline	DB09123	Dienogest	DDI type 15	Choline may decrease the excretion rate of Dienogest which could result in a higher serum level.	0.967602	0	FALSE	FALSE
DB00122	Choline	DB09124	Medrogestone	DDI type 15	Choline may decrease the excretion rate of Medrogestone which could result in a higher serum level.	0.986844	0	FALSE	FALSE
DB00122	Choline	DB09153	Sodium chloride	DDI type 15	Choline may decrease the excretion rate of Sodium chloride which could result in a higher serum level.	0.998621	1	FALSE	FALSE
DB00122	Choline	DB09268	Picosulfuric acid	DDI type 15	Choline may decrease the excretion rate of Picosulfuric acid which could result in a higher serum level.	0.999954	0	FALSE	FALSE
DB00122	Choline	DB09292	Sacubitril	DDI type 15	Choline may decrease the excretion rate of Sacubitril which could result in a higher serum level.	0.99978	0	FALSE	FALSE
DB00122	Choline	DB11135	Selenium	DDI type 15	Choline may decrease the excretion rate of Selenium which could result in a higher serum level.	0.992323	0	FALSE	FALSE
DB00122	Choline	DB11136	Chromium	DDI type 15	Choline may decrease the excretion rate of Chromium which could result in a higher serum level.	0.992323	0	FALSE	FALSE
DB00122	Choline	DB12278	Propiverine	DDI type 15	Choline may decrease the excretion rate of Propiverine which could result in a higher serum level.	0.960475	0	FALSE	FALSE
DB00122	Choline	DB12310	Trehalose	DDI type 26	The risk or severity of adverse effects can be increased when Choline is combined with Trehalose.	0.981815	0	FALSE	TRUE
DB00122	Choline	DB12783	Benserazide	DDI type 15	Choline may decrease the excretion rate of Benserazide which could result in a higher serum level.	0.977659	0	FALSE	FALSE
DB00122	Choline	DB13178	Inositol	DDI type 15	Choline may decrease the excretion rate of Inositol which could result in a higher serum level.	0.999744	0	FALSE	FALSE
DB00122	Choline	DB13642	Pridinol	DDI type 15	Choline may decrease the excretion rate of Pridinol which could result in a higher serum level.	0.957128	0	FALSE	FALSE
DB00122	Choline	DB13919	Candesartan	DDI type 15	Choline may decrease the excretion rate of Candesartan which could result in a higher serum level.	0.961505	0	FALSE	FALSE
DB00122	Choline	DB13956	Estradiol valerate	DDI type 15	Choline may decrease the excretion rate of Estradiol valerate which could result in a higher serum level.	0.993543	0	FALSE	FALSE
DB00122	Choline	DB14219	Monomethyl fumarate	DDI type 26	The risk or severity of adverse effects can be increased when Choline is combined with Monomethyl fumarate.	0.985497	0	FALSE	TRUE
DB00122	Choline	DB14509	Lithium carbonate	DDI type 15	Choline may decrease the excretion rate of Lithium carbonate which could result in a higher serum level.	0.994495	0	FALSE	FALSE
DB00122	Choline	DB14936	Menaquinone 6	DDI type 15	Choline may decrease the excretion rate of Menaquinone 6 which could result in a higher serum level.	0.990452	0	FALSE	FALSE
DB00125	Arginine	DB00121	Biotin	DDI type 26	The risk or severity of adverse effects can be increased when Arginine is combined with Biotin.	0.968954	0	FALSE	TRUE
DB00125	Arginine	DB00134	Methionine	DDI type 26	The risk or severity of adverse effects can be increased when Arginine is combined with Methionine.	0.99679	0	FALSE	TRUE
DB00125	Arginine	DB00137	Lutein	DDI type 26	The risk or severity of adverse effects can be increased when Arginine is combined with Lutein.	0.968473	0	FALSE	TRUE
DB00125	Arginine	DB00140	Riboflavin	DDI type 26	The risk or severity of adverse effects can be increased when Arginine is combined with Riboflavin.	0.997773	0	FALSE	TRUE
DB00125	Arginine	DB00152	Thiamine	DDI type 26	The risk or severity of adverse effects can be increased when Arginine is combined with Thiamine.	0.968927	0	FALSE	TRUE
DB00125	Arginine	DB00162	Vitamin A	DDI type 26	The risk or severity of adverse effects can be increased when Arginine is combined with Vitamin A.	0.998805	0	FALSE	TRUE
DB00125	Arginine	DB00166	Lipoic acid	DDI type 26	The risk or severity of adverse effects can be increased when Arginine is combined with Lipoic acid.	0.997898	0	FALSE	TRUE
DB00125	Arginine	DB00186	Lorazepam	DDI type 26	The risk or severity of adverse effects can be increased when Arginine is combined with Lorazepam.	0.992375	0	FALSE	TRUE
DB00125	Arginine	DB00193	Tramadol	DDI type 26	The risk or severity of adverse effects can be increased when Arginine is combined with Tramadol.	0.999663	0	FALSE	TRUE
DB00125	Arginine	DB00201	Caffeine	DDI type 16	Arginine may increase the excretion rate of Caffeine which could result in a lower serum level and potentially a reduction in efficacy.	0.996853	0	FALSE	FALSE
DB00125	Arginine	DB00209	Trospium	DDI type 26	The risk or severity of adverse effects can be increased when Arginine is combined with Trospium.	0.997006	0	FALSE	TRUE
DB00125	Arginine	DB00209	Trospium	DDI type 54	Arginine may increase the central nervous system depressant (CNS depressant) activities of Trospium.	0.998352	0	FALSE	FALSE
DB00125	Arginine	DB00215	Citalopram	DDI type 26	The risk or severity of adverse effects can be increased when Arginine is combined with Citalopram.	0.999858	0	FALSE	TRUE
DB00125	Arginine	DB00227	Lovastatin	DDI type 6	The metabolism of Lovastatin can be decreased when combined with Arginine.	0.974883	0	FALSE	FALSE
DB00125	Arginine	DB00242	Cladribine	DDI type 26	The risk or severity of adverse effects can be increased when Arginine is combined with Cladribine.	0.999552	0	FALSE	TRUE
DB00125	Arginine	DB00243	Ranolazine	DDI type 15	Arginine may decrease the excretion rate of Ranolazine which could result in a higher serum level.	0.998929	0	FALSE	FALSE
DB00125	Arginine	DB00264	Metoprolol	DDI type 26	The risk or severity of adverse effects can be increased when Arginine is combined with Metoprolol.	0.990188	0	FALSE	TRUE
DB00125	Arginine	DB00281	Lidocaine	DDI type 26	The risk or severity of adverse effects can be increased when Arginine is combined with Lidocaine.	0.997931	0	FALSE	TRUE
DB00125	Arginine	DB00285	Venlafaxine	DDI type 26	The risk or severity of adverse effects can be increased when Arginine is combined with Venlafaxine.	0.998558	0	FALSE	TRUE
DB00125	Arginine	DB00294	Etonogestrel	DDI type 7	The metabolism of Etonogestrel can be increased when combined with Arginine.	0.99207	0	FALSE	FALSE
DB00125	Arginine	DB00295	Morphine	DDI type 26	The risk or severity of adverse effects can be increased when Arginine is combined with Morphine.	0.999276	0	FALSE	TRUE
DB00125	Arginine	DB00304	Desogestrel	DDI type 7	The metabolism of Desogestrel can be increased when combined with Arginine.	0.99946	0	FALSE	FALSE
DB00125	Arginine	DB00315	Zolmitriptan	DDI type 26	The risk or severity of adverse effects can be increased when Arginine is combined with Zolmitriptan.	0.999793	0	FALSE	TRUE
DB00125	Arginine	DB00318	Codeine	DDI type 26	The risk or severity of adverse effects can be increased when Arginine is combined with Codeine.	0.99981	0	FALSE	TRUE
DB00125	Arginine	DB00321	Amitriptyline	DDI type 26	The risk or severity of adverse effects can be increased when Arginine is combined with Amitriptyline.	0.998692	0	FALSE	TRUE
DB00125	Arginine	DB00327	Hydromorphone	DDI type 26	The risk or severity of adverse effects can be increased when Arginine is combined with Hydromorphone.	0.995936	0	FALSE	TRUE
DB00125	Arginine	DB00331	Metformin	DDI type 15	Arginine may decrease the excretion rate of Metformin which could result in a higher serum level.	0.975828	0	FALSE	FALSE
DB00125	Arginine	DB00332	Ipratropium	DDI type 54	Arginine may increase the central nervous system depressant (CNS depressant) activities of Ipratropium.	0.962184	0	FALSE	FALSE
DB00125	Arginine	DB00338	Omeprazole	DDI type 26	The risk or severity of adverse effects can be increased when Arginine is combined with Omeprazole.	0.993941	0	FALSE	TRUE		Pantoprazole (DB00213; P20648), Lansoprazole (DB00448; P20648), Rabeprazole (DB01129; P20648), Dexlansoprazole (DB05351; P20648)
DB00125	Arginine	DB00341	Cetirizine	DDI type 26	The risk or severity of adverse effects can be increased when Arginine is combined with Cetirizine.	0.989633	0	FALSE	TRUE		Loratadine (DB00455; P35367), Butriptyline (DB09016; P35367)
DB00125	Arginine	DB00363	Clozapine	DDI type 26	The risk or severity of adverse effects can be increased when Arginine is combined with Clozapine.	0.99987	0	FALSE	TRUE
DB00125	Arginine	DB00367	Levonorgestrel	DDI type 7	The metabolism of Levonorgestrel can be increased when combined with Arginine.	0.999628	0	FALSE	FALSE
DB00125	Arginine	DB00370	Mirtazapine	DDI type 26	The risk or severity of adverse effects can be increased when Arginine is combined with Mirtazapine.	0.999833	0	FALSE	TRUE
DB00125	Arginine	DB00373	Timolol	DDI type 10	The serum concentration of Timolol can be increased when it is combined with Arginine.	0.994031	0	FALSE	FALSE
DB00125	Arginine	DB00378	Dydrogesterone	DDI type 7	The metabolism of Dydrogesterone can be increased when combined with Arginine.	0.993337	0	FALSE	FALSE
DB00125	Arginine	DB00381	Amlodipine	DDI type 26	The risk or severity of adverse effects can be increased when Arginine is combined with Amlodipine.	0.999255	0	FALSE	TRUE
DB00125	Arginine	DB00391	Sulpiride	DDI type 26	The risk or severity of adverse effects can be increased when Arginine is combined with Sulpiride.	0.99997	0	FALSE	TRUE
DB00125	Arginine	DB00394	Beclomethasone dipropionate	DDI type 26	The risk or severity of adverse effects can be increased when Arginine is combined with Beclomethasone dipropionate.	0.983532	0	FALSE	TRUE
DB00125	Arginine	DB00401	Nisoldipine	DDI type 26	The risk or severity of adverse effects can be increased when Arginine is combined with Nisoldipine.	0.98894	0	FALSE	TRUE
DB00125	Arginine	DB00413	Pramipexole	DDI type 78	Arginine may increase the sedative activities of Pramipexole.	0.998842	0	FALSE	FALSE
DB00125	Arginine	DB00425	Zolpidem	DDI type 26	The risk or severity of adverse effects can be increased when Arginine is combined with Zolpidem.	0.992622	0	FALSE	TRUE
DB00125	Arginine	DB00425	Zolpidem	DDI type 54	Arginine may increase the central nervous system depressant (CNS depressant) activities of Zolpidem.	0.993371	0	FALSE	FALSE
DB00125	Arginine	DB00440	Trimethoprim	DDI type 15	Arginine may decrease the excretion rate of Trimethoprim which could result in a higher serum level.	0.996855	0	FALSE	FALSE
DB00125	Arginine	DB00443	Betamethasone	DDI type 26	The risk or severity of adverse effects can be increased when Arginine is combined with Betamethasone.	0.999593	0	FALSE	TRUE
DB00125	Arginine	DB00455	Loratadine	DDI type 45	Arginine may increase the anticholinergic activities of Loratadine.	0.996735	0	FALSE	FALSE
DB00125	Arginine	DB00468	Quinine	DDI type 26	The risk or severity of adverse effects can be increased when Arginine is combined with Quinine.	0.999965	0	FALSE	TRUE
DB00125	Arginine	DB00472	Fluoxetine	DDI type 26	The risk or severity of adverse effects can be increased when Arginine is combined with Fluoxetine.	0.999847	0	FALSE	TRUE
DB00125	Arginine	DB00472	Fluoxetine	DDI type 54	Arginine may increase the central nervous system depressant (CNS depressant) activities of Fluoxetine.	0.995962	0	FALSE	FALSE
DB00125	Arginine	DB00476	Duloxetine	DDI type 26	The risk or severity of adverse effects can be increased when Arginine is combined with Duloxetine.	0.99995	0	FALSE	TRUE
DB00125	Arginine	DB00496	Darifenacin	DDI type 26	The risk or severity of adverse effects can be increased when Arginine is combined with Darifenacin.	0.954368	0	FALSE	TRUE		Ipratropium (DB00332; P20309), Homatropine methylbromide (DB00725; P20309), Glycopyrronium (DB00986; P20309), Butylscopolamine (DB09300; P20309)
DB00125	Arginine	DB00496	Darifenacin	DDI type 54	Arginine may increase the central nervous system depressant (CNS depressant) activities of Darifenacin.	0.97795	0	FALSE	FALSE
DB00125	Arginine	DB00497	Oxycodone	DDI type 26	The risk or severity of adverse effects can be increased when Arginine is combined with Oxycodone.	0.999756	0	FALSE	TRUE		Opium (DB11130; P35372|P41145|P41143)
DB00125	Arginine	DB00555	Lamotrigine	DDI type 54	Arginine may increase the central nervous system depressant (CNS depressant) activities of Lamotrigine.	0.996563	0	FALSE	FALSE
DB00125	Arginine	DB00564	Carbamazepine	DDI type 26	The risk or severity of adverse effects can be increased when Arginine is combined with Carbamazepine.	0.999559	0	FALSE	TRUE
DB00125	Arginine	DB00568	Cinnarizine	DDI type 26	The risk or severity of adverse effects can be increased when Arginine is combined with Cinnarizine.	0.996392	0	FALSE	TRUE
DB00125	Arginine	DB00571	Propranolol	DDI type 26	The risk or severity of adverse effects can be increased when Arginine is combined with Propranolol.	0.987666	0	FALSE	TRUE
DB00125	Arginine	DB00581	Lactulose	DDI type 13	The therapeutic efficacy of Lactulose can be decreased when used in combination with Arginine.	0.999889	0	FALSE	FALSE
DB00125	Arginine	DB00584	Enalapril	DDI type 26	The risk or severity of adverse effects can be increased when Arginine is combined with Enalapril.	0.975172	1	FALSE	TRUE		Enalaprilat (DB09477; P12821)
DB00125	Arginine	DB00588	Fluticasone propionate	DDI type 26	The risk or severity of adverse effects can be increased when Arginine is combined with Fluticasone propionate.	0.999879	0	FALSE	TRUE
DB00125	Arginine	DB00590	Doxazosin	DDI type 26	The risk or severity of adverse effects can be increased when Arginine is combined with Doxazosin.	0.998842	0	FALSE	TRUE
DB00125	Arginine	DB00635	Prednisone	DDI type 26	The risk or severity of adverse effects can be increased when Arginine is combined with Prednisone.	0.998804	0	FALSE	TRUE
DB00125	Arginine	DB00656	Trazodone	DDI type 26	The risk or severity of adverse effects can be increased when Arginine is combined with Trazodone.	0.999976	0	FALSE	TRUE
DB00125	Arginine	DB00669	Sumatriptan	DDI type 26	The risk or severity of adverse effects can be increased when Arginine is combined with Sumatriptan.	0.993912	0	FALSE	TRUE
DB00125	Arginine	DB00675	Tamoxifen	DDI type 7	The metabolism of Tamoxifen can be increased when combined with Arginine.	0.999657	0	FALSE	FALSE
DB00125	Arginine	DB00678	Losartan	DDI type 26	The risk or severity of adverse effects can be increased when Arginine is combined with Losartan.	0.981324	0	FALSE	TRUE
DB00125	Arginine	DB00687	Fludrocortisone	DDI type 26	The risk or severity of adverse effects can be increased when Arginine is combined with Fludrocortisone.	0.999878	0	FALSE	TRUE
DB00125	Arginine	DB00697	Tizanidine	DDI type 26	The risk or severity of adverse effects can be increased when Arginine is combined with Tizanidine.	0.999871	0	FALSE	TRUE
DB00125	Arginine	DB00698	Nitrofurantoin	DDI type 26	The risk or severity of adverse effects can be increased when Arginine is combined with Nitrofurantoin.	0.988588	0	FALSE	TRUE
DB00125	Arginine	DB00706	Tamsulosin	DDI type 26	The risk or severity of adverse effects can be increased when Arginine is combined with Tamsulosin.	0.999584	0	FALSE	TRUE
DB00125	Arginine	DB00715	Paroxetine	DDI type 26	The risk or severity of adverse effects can be increased when Arginine is combined with Paroxetine.	0.999943	0	FALSE	TRUE
DB00125	Arginine	DB00717	Norethisterone	DDI type 7	The metabolism of Norethisterone can be increased when combined with Arginine.	0.999463	0	FALSE	FALSE
DB00125	Arginine	DB00726	Trimipramine	DDI type 26	The risk or severity of adverse effects can be increased when Arginine is combined with Trimipramine.	0.999447	0	FALSE	TRUE
DB00125	Arginine	DB00727	Nitroglycerin	DDI type 26	The risk or severity of adverse effects can be increased when Arginine is combined with Nitroglycerin.	0.992733	0	FALSE	TRUE
DB00125	Arginine	DB00736	Esomeprazole	DDI type 26	The risk or severity of adverse effects can be increased when Arginine is combined with Esomeprazole.	0.996516	0	FALSE	TRUE		Pantoprazole (DB00213; P20648), Lansoprazole (DB00448; P20648), Rabeprazole (DB01129; P20648), Dexlansoprazole (DB05351; P20648)
DB00125	Arginine	DB00741	Hydrocortisone	DDI type 26	The risk or severity of adverse effects can be increased when Arginine is combined with Hydrocortisone.	0.999765	0	FALSE	TRUE
DB00125	Arginine	DB00764	Mometasone	DDI type 26	The risk or severity of adverse effects can be increased when Arginine is combined with Mometasone.	0.999889	0	FALSE	TRUE
DB00125	Arginine	DB00776	Oxcarbazepine	DDI type 26	The risk or severity of adverse effects can be increased when Arginine is combined with Oxcarbazepine.	0.999731	0	FALSE	TRUE
DB00125	Arginine	DB00794	Primidone	DDI type 26	The risk or severity of adverse effects can be increased when Arginine is combined with Primidone.	0.995601	0	FALSE	TRUE
DB00125	Arginine	DB00813	Fentanyl	DDI type 26	The risk or severity of adverse effects can be increased when Arginine is combined with Fentanyl.	0.997713	0	FALSE	TRUE		Opium (DB11130; P35372|P41143)
DB00125	Arginine	DB00829	Diazepam	DDI type 26	The risk or severity of adverse effects can be increased when Arginine is combined with Diazepam.	0.998264	0	FALSE	TRUE
DB00125	Arginine	DB00860	Prednisolone	DDI type 26	The risk or severity of adverse effects can be increased when Arginine is combined with Prednisolone.	0.999799	0	FALSE	TRUE
DB00125	Arginine	DB00884	Risedronic acid	DDI type 63	Arginine may increase the hypocalcemic activities of Risedronic acid.	0.968387	0	FALSE	FALSE
DB00125	Arginine	DB00904	Ondansetron	DDI type 26	The risk or severity of adverse effects can be increased when Arginine is combined with Ondansetron.	0.999962	0	FALSE	TRUE
DB00125	Arginine	DB00925	Phenoxybenzamine	DDI type 26	The risk or severity of adverse effects can be increased when Arginine is combined with Phenoxybenzamine.	0.999872	0	FALSE	TRUE
DB00125	Arginine	DB00952	Naratriptan	DDI type 26	The risk or severity of adverse effects can be increased when Arginine is combined with Naratriptan.	0.999893	0	FALSE	TRUE
DB00125	Arginine	DB00953	Rizatriptan	DDI type 26	The risk or severity of adverse effects can be increased when Arginine is combined with Rizatriptan.	0.999919	0	FALSE	TRUE
DB00125	Arginine	DB00957	Norgestimate	DDI type 7	The metabolism of Norgestimate can be increased when combined with Arginine.	0.987211	0	FALSE	FALSE
DB00125	Arginine	DB00959	Methylprednisolone	DDI type 26	The risk or severity of adverse effects can be increased when Arginine is combined with Methylprednisolone.	0.999904	0	FALSE	TRUE
DB00125	Arginine	DB00967	Desloratadine	DDI type 26	The risk or severity of adverse effects can be increased when Arginine is combined with Desloratadine.	0.999864	0	FALSE	TRUE		Loratadine (DB00455; P35367), Butriptyline (DB09016; P35367)
DB00125	Arginine	DB00977	Ethinylestradiol	DDI type 7	The metabolism of Ethinylestradiol can be increased when combined with Arginine.	0.994487	0	FALSE	FALSE
DB00125	Arginine	DB00983	Formoterol	DDI type 26	The risk or severity of adverse effects can be increased when Arginine is combined with Formoterol.	0.95275	0	FALSE	TRUE		Orciprenaline (DB00816; P07550), Ritodrine (DB00867; P07550), Indacaterol (DB05039; P07550), Racepinephrine (DB11124; P07550)
DB00125	Arginine	DB00985	Dimenhydrinate	DDI type 26	The risk or severity of adverse effects can be increased when Arginine is combined with Dimenhydrinate.	0.999872	0	FALSE	TRUE		Loratadine (DB00455; P35367), Butriptyline (DB09016; P35367)
DB00125	Arginine	DB00989	Rivastigmine	DDI type 26	The risk or severity of adverse effects can be increased when Arginine is combined with Rivastigmine.	0.999024	0	FALSE	TRUE		Edrophonium (DB01010; P22303|P06276)
DB00125	Arginine	DB00996	Gabapentin	DDI type 26	The risk or severity of adverse effects can be increased when Arginine is combined with Gabapentin.	0.998884	0	FALSE	TRUE
DB00125	Arginine	DB00999	Hydrochlorothiazide	DDI type 26	The risk or severity of adverse effects can be increased when Arginine is combined with Hydrochlorothiazide.	0.992758	0	FALSE	TRUE
DB00125	Arginine	DB01001	Salbutamol	DDI type 26	The risk or severity of adverse effects can be increased when Arginine is combined with Salbutamol.	0.979818	0	FALSE	TRUE		Orciprenaline (DB00816; P07550), Ritodrine (DB00867; P07550), Indacaterol (DB05039; P07550), Racepinephrine (DB11124; P07550)
DB00125	Arginine	DB01019	Bethanechol	DDI type 26	The risk or severity of adverse effects can be increased when Arginine is combined with Bethanechol.	0.999648	0	FALSE	TRUE
DB00125	Arginine	DB01043	Memantine	DDI type 15	Arginine may decrease the excretion rate of Memantine which could result in a higher serum level.	0.991179	0	FALSE	FALSE
DB00125	Arginine	DB01062	Oxybutynin	DDI type 26	The risk or severity of adverse effects can be increased when Arginine is combined with Oxybutynin.	0.984347	0	FALSE	TRUE		Ipratropium (DB00332; P20309|P08172|P11229), Homatropine methylbromide (DB00725; P20309|P08172|P11229), Glycopyrronium (DB00986; P20309|P08172|P11229)
DB00125	Arginine	DB01065	Melatonin	DDI type 26	The risk or severity of adverse effects can be increased when Arginine is combined with Melatonin.	0.999981	0	FALSE	TRUE
DB00125	Arginine	DB01068	Clonazepam	DDI type 26	The risk or severity of adverse effects can be increased when Arginine is combined with Clonazepam.	0.999866	0	FALSE	TRUE
DB00125	Arginine	DB01075	Diphenhydramine	DDI type 26	The risk or severity of adverse effects can be increased when Arginine is combined with Diphenhydramine.	0.99975	0	FALSE	TRUE		Loratadine (DB00455; P35367), Butriptyline (DB09016; P35367)
DB00125	Arginine	DB01086	Benzocaine	DDI type 26	The risk or severity of adverse effects can be increased when Arginine is combined with Benzocaine.	0.999962	0	FALSE	TRUE
DB00125	Arginine	DB01097	Leflunomide	DDI type 26	The risk or severity of adverse effects can be increased when Arginine is combined with Leflunomide.	0.999506	0	FALSE	TRUE
DB00125	Arginine	DB01104	Sertraline	DDI type 26	The risk or severity of adverse effects can be increased when Arginine is combined with Sertraline.	0.999936	0	FALSE	TRUE
DB00125	Arginine	DB01114	Chlorpheniramine	DDI type 26	The risk or severity of adverse effects can be increased when Arginine is combined with Chlorpheniramine.	0.999307	0	FALSE	TRUE		Loratadine (DB00455; P35367), Butriptyline (DB09016; P35367)
DB00125	Arginine	DB01128	Bicalutamide	DDI type 26	The risk or severity of adverse effects can be increased when Arginine is combined with Bicalutamide.	0.974229	0	FALSE	TRUE		Apalutamide (DB11901; P10275)
DB00125	Arginine	DB01128	Bicalutamide	DDI type 6	The metabolism of Bicalutamide can be decreased when combined with Arginine.	0.993317	0	FALSE	FALSE
DB00125	Arginine	DB01136	Carvedilol	DDI type 26	The risk or severity of adverse effects can be increased when Arginine is combined with Carvedilol.	0.99579	0	FALSE	TRUE
DB00125	Arginine	DB01137	Levofloxacin	DDI type 15	Arginine may decrease the excretion rate of Levofloxacin which could result in a higher serum level.	0.998728	0	FALSE	FALSE
DB00125	Arginine	DB01142	Doxepin	DDI type 26	The risk or severity of adverse effects can be increased when Arginine is combined with Doxepin.	0.999648	0	FALSE	TRUE
DB00125	Arginine	DB01156	Bupropion	DDI type 26	The risk or severity of adverse effects can be increased when Arginine is combined with Bupropion.	0.999798	1	FALSE	TRUE
DB00125	Arginine	DB01162	Terazosin	DDI type 26	The risk or severity of adverse effects can be increased when Arginine is combined with Terazosin.	0.999761	0	FALSE	TRUE
DB00125	Arginine	DB01175	Escitalopram	DDI type 26	The risk or severity of adverse effects can be increased when Arginine is combined with Escitalopram.	0.999858	0	FALSE	TRUE
DB00125	Arginine	DB01198	Zopiclone	DDI type 26	The risk or severity of adverse effects can be increased when Arginine is combined with Zopiclone.	0.999668	0	FALSE	TRUE
DB00125	Arginine	DB01202	Levetiracetam	DDI type 26	The risk or severity of adverse effects can be increased when Arginine is combined with Levetiracetam.	0.985119	0	FALSE	TRUE
DB00125	Arginine	DB01204	Mitoxantrone	DDI type 26	The risk or severity of adverse effects can be increased when Arginine is combined with Mitoxantrone.	0.999701	0	FALSE	TRUE
DB00125	Arginine	DB01216	Finasteride	DDI type 26	The risk or severity of adverse effects can be increased when Arginine is combined with Finasteride.	0.999049	0	FALSE	TRUE
DB00125	Arginine	DB01222	Budesonide	DDI type 26	The risk or severity of adverse effects can be increased when Arginine is combined with Budesonide.	0.999605	0	FALSE	TRUE
DB00125	Arginine	DB01224	Quetiapine	DDI type 26	The risk or severity of adverse effects can be increased when Arginine is combined with Quetiapine.	0.99994	0	FALSE	TRUE
DB00125	Arginine	DB01233	Metoclopramide	DDI type 26	The risk or severity of adverse effects can be increased when Arginine is combined with Metoclopramide.	0.998708	0	FALSE	TRUE
DB00125	Arginine	DB01234	Dexamethasone	DDI type 26	The risk or severity of adverse effects can be increased when Arginine is combined with Dexamethasone.	0.999593	0	FALSE	TRUE
DB00125	Arginine	DB01235	Levodopa	DDI type 26	The risk or severity of adverse effects can be increased when Arginine is combined with Levodopa.	0.999297	0	FALSE	TRUE
DB00125	Arginine	DB01390	Sodium bicarbonate	DDI type 15	Arginine may decrease the excretion rate of Sodium bicarbonate which could result in a higher serum level.	0.999759	0	FALSE	FALSE
DB00125	Arginine	DB01591	Solifenacin	DDI type 26	The risk or severity of adverse effects can be increased when Arginine is combined with Solifenacin.	0.997805	0	FALSE	TRUE		Ipratropium (DB00332; P20309), Homatropine methylbromide (DB00725; P20309), Glycopyrronium (DB00986; P20309), Butylscopolamine (DB09300; P20309)
DB00125	Arginine	DB01591	Solifenacin	DDI type 54	Arginine may increase the central nervous system depressant (CNS depressant) activities of Solifenacin.	0.98037	0	FALSE	FALSE
DB00125	Arginine	DB01611	Hydroxychloroquine	DDI type 26	The risk or severity of adverse effects can be increased when Arginine is combined with Hydroxychloroquine.	0.998947	0	FALSE	TRUE
DB00125	Arginine	DB01783	Pantothenic acid	DDI type 13	The therapeutic efficacy of Pantothenic acid can be decreased when used in combination with Arginine.	0.974886	0	FALSE	FALSE
DB00125	Arginine	DB02714	3'-Uridinemonophosphate	DDI type 26	The risk or severity of adverse effects can be increased when Arginine is combined with 3'-Uridinemonophosphate.	0.996325	0	FALSE	TRUE
DB00125	Arginine	DB04703	Hesperidin	DDI type 26	The risk or severity of adverse effects can be increased when Arginine is combined with Hesperidin.	0.988961	0	FALSE	TRUE
DB00125	Arginine	DB04861	Nebivolol	DDI type 26	The risk or severity of adverse effects can be increased when Arginine is combined with Nebivolol.	0.996506	0	FALSE	TRUE
DB00125	Arginine	DB04896	Milnacipran	DDI type 26	The risk or severity of adverse effects can be increased when Arginine is combined with Milnacipran.	0.999697	0	FALSE	TRUE
DB00125	Arginine	DB05271	Rotigotine	DDI type 78	Arginine may increase the sedative activities of Rotigotine.	0.999745	0	FALSE	FALSE
DB00125	Arginine	DB05541	Brivaracetam	DDI type 26	The risk or severity of adverse effects can be increased when Arginine is combined with Brivaracetam.	0.946936	0	FALSE	TRUE
DB00125	Arginine	DB06148	Mianserin	DDI type 26	The risk or severity of adverse effects can be increased when Arginine is combined with Mianserin.	0.999835	0	FALSE	TRUE
DB00125	Arginine	DB06151	Acetylcysteine	DDI type 26	The risk or severity of adverse effects can be increased when Arginine is combined with Acetylcysteine.	0.952273	0	FALSE	TRUE
DB00125	Arginine	DB06151	Acetylcysteine	DDI type 15	Arginine may decrease the excretion rate of Acetylcysteine which could result in a higher serum level.	0.985503	0	FALSE	FALSE
DB00125	Arginine	DB06264	Tolperisone	DDI type 26	The risk or severity of adverse effects can be increased when Arginine is combined with Tolperisone.	0.999957	0	FALSE	TRUE
DB00125	Arginine	DB06594	Agomelatine	DDI type 26	The risk or severity of adverse effects can be increased when Arginine is combined with Agomelatine.	0.999924	0	FALSE	TRUE
DB00125	Arginine	DB06605	Apixaban	DDI type 26	The risk or severity of adverse effects can be increased when Arginine is combined with Apixaban.	0.973986	0	FALSE	TRUE		Fondaparinux (DB00569; P00742), Heparin (DB01109; P00742), Enoxaparin (DB01225; P00742), Edoxaban (DB09075; P00742), Antithrombin Alfa (DB11166; P00742)
DB00125	Arginine	DB06623	Flupirtine	DDI type 26	The risk or severity of adverse effects can be increased when Arginine is combined with Flupirtine.	0.999479	0	FALSE	TRUE
DB00125	Arginine	DB06623	Flupirtine	DDI type 15	Arginine may decrease the excretion rate of Flupirtine which could result in a higher serum level.	0.996752	0	FALSE	FALSE
DB00125	Arginine	DB06755	Beta carotene	DDI type 26	The risk or severity of adverse effects can be increased when Arginine is combined with Beta carotene.	0.98643	0	FALSE	TRUE		Tocopherol (DB11251; Free radicals), alpha-Tocopherol acetate (DB14003; Free radicals)
DB00125	Arginine	DB08801	Dimetindene	DDI type 26	The risk or severity of adverse effects can be increased when Arginine is combined with Dimetindene.	0.999635	0	FALSE	TRUE
DB00125	Arginine	DB08818	Hyaluronic acid	DDI type 15	Arginine may decrease the excretion rate of Hyaluronic acid which could result in a higher serum level.	0.999466	0	FALSE	FALSE
DB00125	Arginine	DB08868	Fingolimod	DDI type 69	Arginine may increase the immunosuppressive activities of Fingolimod.	0.99196	0	FALSE	FALSE
DB00125	Arginine	DB08880	Teriflunomide	DDI type 26	The risk or severity of adverse effects can be increased when Arginine is combined with Teriflunomide.	0.994629	0	FALSE	TRUE
DB00125	Arginine	DB08906	Fluticasone furoate	DDI type 26	The risk or severity of adverse effects can be increased when Arginine is combined with Fluticasone furoate.	0.999976	0	FALSE	TRUE
DB00125	Arginine	DB08908	Dimethyl fumarate	DDI type 26	The risk or severity of adverse effects can be increased when Arginine is combined with Dimethyl fumarate.	0.996492	0	FALSE	TRUE
DB00125	Arginine	DB09020	Bisacodyl	DDI type 13	The therapeutic efficacy of Bisacodyl can be decreased when used in combination with Arginine.	0.999791	0	FALSE	FALSE
DB00125	Arginine	DB09061	Cannabidiol	DDI type 26	The risk or severity of adverse effects can be increased when Arginine is combined with Cannabidiol.	0.999213	0	FALSE	TRUE
DB00125	Arginine	DB09070	Tibolone	DDI type 7	The metabolism of Tibolone can be increased when combined with Arginine.	0.971991	0	FALSE	FALSE
DB00125	Arginine	DB09082	Vilanterol	DDI type 26	The risk or severity of adverse effects can be increased when Arginine is combined with Vilanterol.	0.993622	0	FALSE	TRUE		Orciprenaline (DB00816; P07550), Ritodrine (DB00867; P07550), Indacaterol (DB05039; P07550), Racepinephrine (DB11124; P07550)
DB00125	Arginine	DB09083	Ivabradine	DDI type 26	The risk or severity of adverse effects can be increased when Arginine is combined with Ivabradine.	0.960435	0	FALSE	TRUE
DB00125	Arginine	DB09123	Dienogest	DDI type 7	The metabolism of Dienogest can be increased when combined with Arginine.	0.964049	0	FALSE	FALSE
DB00125	Arginine	DB09153	Sodium chloride	DDI type 15	Arginine may decrease the excretion rate of Sodium chloride which could result in a higher serum level.	0.999528	0	FALSE	FALSE
DB00125	Arginine	DB09242	Moxonidine	DDI type 26	The risk or severity of adverse effects can be increased when Arginine is combined with Moxonidine.	0.99798	0	FALSE	TRUE
DB00125	Arginine	DB09268	Picosulfuric acid	DDI type 13	The therapeutic efficacy of Picosulfuric acid can be decreased when used in combination with Arginine.	0.995588	0	FALSE	FALSE
DB00125	Arginine	DB09286	Pipamperone	DDI type 26	The risk or severity of adverse effects can be increased when Arginine is combined with Pipamperone.	0.999753	0	FALSE	TRUE
DB00125	Arginine	DB09289	Tianeptine	DDI type 26	The risk or severity of adverse effects can be increased when Arginine is combined with Tianeptine.	0.999316	0	FALSE	TRUE
DB00125	Arginine	DB09292	Sacubitril	DDI type 26	The risk or severity of adverse effects can be increased when Arginine is combined with Sacubitril.	0.995664	0	FALSE	TRUE
DB00125	Arginine	DB09292	Sacubitril	DDI type 15	Arginine may decrease the excretion rate of Sacubitril which could result in a higher serum level.	0.978157	0	FALSE	FALSE
DB00125	Arginine	DB09512	Simethicone	DDI type 26	The risk or severity of adverse effects can be increased when Arginine is combined with Simethicone.	0.999933	0	FALSE	TRUE
DB00125	Arginine	DB11073	Cetylpyridinium	DDI type 14	The therapeutic efficacy of Cetylpyridinium can be increased when used in combination with Arginine.	0.968638	0	FALSE	FALSE
DB00125	Arginine	DB11642	Pitolisant	DDI type 26	The risk or severity of adverse effects can be increased when Arginine is combined with Pitolisant.	0.999222	0	FALSE	TRUE
DB00125	Arginine	DB12016	Ponesimod	DDI type 26	The risk or severity of adverse effects can be increased when Arginine is combined with Ponesimod.	0.999836	0	FALSE	TRUE
DB00125	Arginine	DB12278	Propiverine	DDI type 26	The risk or severity of adverse effects can be increased when Arginine is combined with Propiverine.	0.997999	0	FALSE	TRUE
DB00125	Arginine	DB12310	Trehalose	DDI type 13	The therapeutic efficacy of Trehalose can be decreased when used in combination with Arginine.	0.999873	0	FALSE	FALSE
DB00125	Arginine	DB12371	Siponimod	DDI type 26	The risk or severity of adverse effects can be increased when Arginine is combined with Siponimod.	0.999537	0	FALSE	TRUE
DB00125	Arginine	DB12582	Piperine	DDI type 26	The risk or severity of adverse effects can be increased when Arginine is combined with Piperine.	0.996074	0	FALSE	TRUE
DB00125	Arginine	DB12612	Ozanimod	DDI type 26	The risk or severity of adverse effects can be increased when Arginine is combined with Ozanimod.	0.999756	0	FALSE	TRUE
DB00125	Arginine	DB12661	Urapidil	DDI type 26	The risk or severity of adverse effects can be increased when Arginine is combined with Urapidil.	0.999979	0	FALSE	TRUE
DB00125	Arginine	DB12783	Benserazide	DDI type 15	Arginine may decrease the excretion rate of Benserazide which could result in a higher serum level.	0.995408	0	FALSE	FALSE
DB00125	Arginine	DB12930	Opipramol	DDI type 26	The risk or severity of adverse effects can be increased when Arginine is combined with Opipramol.	0.99997	0	FALSE	TRUE
DB00125	Arginine	DB13178	Inositol	DDI type 15	Arginine may decrease the excretion rate of Inositol which could result in a higher serum level.	0.998085	0	FALSE	FALSE
DB00125	Arginine	DB13324	Tetrazepam	DDI type 26	The risk or severity of adverse effects can be increased when Arginine is combined with Tetrazepam.	0.999951	0	FALSE	TRUE
DB00125	Arginine	DB13528	Chlormadinone	DDI type 7	The metabolism of Chlormadinone can be increased when combined with Arginine.	0.980045	0	FALSE	FALSE
DB00125	Arginine	DB13619	Bornaprine	DDI type 26	The risk or severity of adverse effects can be increased when Arginine is combined with Bornaprine.	0.997906	0	FALSE	TRUE
DB00125	Arginine	DB13619	Bornaprine	DDI type 54	Arginine may increase the central nervous system depressant (CNS depressant) activities of Bornaprine.	0.99914	0	FALSE	FALSE
DB00125	Arginine	DB13642	Pridinol	DDI type 26	The risk or severity of adverse effects can be increased when Arginine is combined with Pridinol.	0.999934	0	FALSE	TRUE
DB00125	Arginine	DB13787	Tilidine	DDI type 26	The risk or severity of adverse effects can be increased when Arginine is combined with Tilidine.	0.999761	0	FALSE	TRUE
DB00125	Arginine	DB13919	Candesartan	DDI type 6	The metabolism of Candesartan can be decreased when combined with Arginine.	0.992238	0	FALSE	FALSE
DB00125	Arginine	DB14509	Lithium carbonate	DDI type 26	The risk or severity of adverse effects can be increased when Arginine is combined with Lithium carbonate.	0.990519	0	FALSE	TRUE
DB00125	Arginine	DB14509	Lithium carbonate	DDI type 15	Arginine may decrease the excretion rate of Lithium carbonate which could result in a higher serum level.	0.986441	0	FALSE	FALSE
DB00125	Arginine	DB14513	Magnesium	DDI type 9	The serum concentration of Magnesium can be decreased when it is combined with Arginine.	0.952224	0	FALSE	FALSE
DB00125	Arginine	DB14634	Fluprednidene acetate	DDI type 26	The risk or severity of adverse effects can be increased when Arginine is combined with Fluprednidene acetate.	0.999296	0	FALSE	TRUE
DB00125	Arginine	DB14681	Cortisone	DDI type 26	The risk or severity of adverse effects can be increased when Arginine is combined with Cortisone.	0.997071	0	FALSE	TRUE
DB00125	Arginine	DB14783	Diroximel fumarate	DDI type 26	The risk or severity of adverse effects can be increased when Arginine is combined with Diroximel fumarate.	0.999849	0	FALSE	TRUE
DB00125	Arginine	DB15170	Evobrutinib	DDI type 26	The risk or severity of adverse effects can be increased when Arginine is combined with Evobrutinib.	0.997851	0	FALSE	TRUE
DB00125	Arginine	DB16272	Orelabrutinib	DDI type 26	The risk or severity of adverse effects can be increased when Arginine is combined with Orelabrutinib.	0.999439	0	FALSE	TRUE
DB00125	Arginine	-	Tolebrutinib	DDI type 26	The risk or severity of adverse effects can be increased when Arginine is combined with Tolebrutinib.	0.977038	0	FALSE	TRUE
DB00126	Ascorbic acid	DB00115	Cyanocobalamin	DDI type 13	The therapeutic efficacy of Cyanocobalamin can be decreased when used in combination with Ascorbic acid.	0.997782	8	FALSE	FALSE
DB00126	Ascorbic acid	DB00121	Biotin	DDI type 15	Ascorbic acid may decrease the excretion rate of Biotin which could result in a higher serum level.	0.960637	5	FALSE	FALSE
DB00126	Ascorbic acid	DB00122	Choline	DDI type 15	Ascorbic acid may decrease the excretion rate of Choline which could result in a higher serum level.	0.992961	0	FALSE	FALSE
DB00126	Ascorbic acid	DB00137	Lutein	DDI type 13	The therapeutic efficacy of Lutein can be decreased when used in combination with Ascorbic acid.	0.99771	0	FALSE	FALSE
DB00126	Ascorbic acid	DB00138	Cystine	DDI type 26	The risk or severity of adverse effects can be increased when Ascorbic acid is combined with Cystine.	0.997738	0	FALSE	TRUE
DB00126	Ascorbic acid	DB00138	Cystine	DDI type 15	Ascorbic acid may decrease the excretion rate of Cystine which could result in a higher serum level.	0.969071	0	FALSE	FALSE
DB00126	Ascorbic acid	DB00140	Riboflavin	DDI type 15	Ascorbic acid may decrease the excretion rate of Riboflavin which could result in a higher serum level.	0.957713	3	FALSE	FALSE
DB00126	Ascorbic acid	DB00190	Carbidopa	DDI type 1	Ascorbic acid can cause a decrease in the absorption of Carbidopa resulting in a reduced serum concentration and potentially a decrease in efficacy.	0.955163	0	FALSE	FALSE
DB00126	Ascorbic acid	DB00193	Tramadol	DDI type 15	Ascorbic acid may decrease the excretion rate of Tramadol which could result in a higher serum level.	0.940936	0	FALSE	FALSE
DB00126	Ascorbic acid	DB00209	Trospium	DDI type 13	The therapeutic efficacy of Trospium can be decreased when used in combination with Ascorbic acid.	0.953162	3	FALSE	FALSE
DB00126	Ascorbic acid	DB00222	Glimepiride	DDI type 15	Ascorbic acid may decrease the excretion rate of Glimepiride which could result in a higher serum level.	0.984422	0	FALSE	FALSE
DB00126	Ascorbic acid	DB00254	Doxycycline	DDI type 13	The therapeutic efficacy of Doxycycline can be decreased when used in combination with Ascorbic acid.	0.999673	0	TRUE	FALSE
DB00126	Ascorbic acid	DB00254	Doxycycline	DDI type 1	Ascorbic acid can cause a decrease in the absorption of Doxycycline resulting in a reduced serum concentration and potentially a decrease in efficacy.	0.983621	0	FALSE	FALSE
DB00126	Ascorbic acid	DB00273	Topiramate	DDI type 15	Ascorbic acid may decrease the excretion rate of Topiramate which could result in a higher serum level.	0.945754	0	FALSE	FALSE
DB00126	Ascorbic acid	DB00279	Liothyronine	DDI type 15	Ascorbic acid may decrease the excretion rate of Liothyronine which could result in a higher serum level.	0.986103	0	FALSE	FALSE
DB00126	Ascorbic acid	DB00281	Lidocaine	DDI type 9	The serum concentration of Lidocaine can be decreased when it is combined with Ascorbic acid.	0.999255	0	FALSE	FALSE
DB00126	Ascorbic acid	DB00287	Travoprost	DDI type 13	The therapeutic efficacy of Travoprost can be decreased when used in combination with Ascorbic acid.	0.999726	0	FALSE	FALSE
DB00126	Ascorbic acid	DB00315	Zolmitriptan	DDI type 15	Ascorbic acid may decrease the excretion rate of Zolmitriptan which could result in a higher serum level.	0.996778	0	FALSE	FALSE
DB00126	Ascorbic acid	DB00331	Metformin	DDI type 15	Ascorbic acid may decrease the excretion rate of Metformin which could result in a higher serum level.	0.960985	0	FALSE	FALSE
DB00126	Ascorbic acid	DB00341	Cetirizine	DDI type 15	Ascorbic acid may decrease the excretion rate of Cetirizine which could result in a higher serum level.	0.998872	0	FALSE	FALSE
DB00126	Ascorbic acid	DB00373	Timolol	DDI type 9	The serum concentration of Timolol can be decreased when it is combined with Ascorbic acid.	0.94239	1	FALSE	FALSE
DB00126	Ascorbic acid	DB00373	Timolol	DDI type 61	Ascorbic acid may increase the hyperkalemic activities of Timolol.	0.967353	1	FALSE	FALSE
DB00126	Ascorbic acid	DB00440	Trimethoprim	DDI type 9	The serum concentration of Trimethoprim can be decreased when it is combined with Ascorbic acid.	0.94875	0	FALSE	FALSE
DB00126	Ascorbic acid	DB00468	Quinine	DDI type 9	The serum concentration of Quinine can be decreased when it is combined with Ascorbic acid.	0.976743	0	FALSE	FALSE
DB00126	Ascorbic acid	DB00468	Quinine	DDI type 15	Ascorbic acid may decrease the excretion rate of Quinine which could result in a higher serum level.	0.978034	0	FALSE	FALSE
DB00126	Ascorbic acid	DB00470	Dronabinol	DDI type 10	The serum concentration of Dronabinol can be increased when it is combined with Ascorbic acid.	0.984579	0	FALSE	FALSE
DB00126	Ascorbic acid	DB00472	Fluoxetine	DDI type 9	The serum concentration of Fluoxetine can be decreased when it is combined with Ascorbic acid.	0.965564	0	FALSE	FALSE
DB00126	Ascorbic acid	DB00497	Oxycodone	DDI type 7	The metabolism of Oxycodone can be increased when combined with Ascorbic acid.	0.9523	0	FALSE	FALSE
DB00126	Ascorbic acid	DB00537	Ciprofloxacin	DDI type 15	Ascorbic acid may decrease the excretion rate of Ciprofloxacin which could result in a higher serum level.	0.995606	0	FALSE	FALSE
DB00126	Ascorbic acid	DB00571	Propranolol	DDI type 9	The serum concentration of Propranolol can be decreased when it is combined with Ascorbic acid.	0.999187	0	FALSE	FALSE
DB00126	Ascorbic acid	DB00581	Lactulose	DDI type 13	The therapeutic efficacy of Lactulose can be decreased when used in combination with Ascorbic acid.	0.997535	0	FALSE	FALSE
DB00126	Ascorbic acid	DB00669	Sumatriptan	DDI type 15	Ascorbic acid may decrease the excretion rate of Sumatriptan which could result in a higher serum level.	0.99978	0	FALSE	FALSE
DB00126	Ascorbic acid	DB00763	Methimazole	DDI type 15	Ascorbic acid may decrease the excretion rate of Methimazole which could result in a higher serum level.	0.978435	1	FALSE	FALSE
DB00126	Ascorbic acid	DB00829	Diazepam	DDI type 15	Ascorbic acid may decrease the excretion rate of Diazepam which could result in a higher serum level.	0.973485	0	FALSE	FALSE
DB00126	Ascorbic acid	DB00863	Ranitidine	DDI type 9	The serum concentration of Ranitidine can be decreased when it is combined with Ascorbic acid.	0.975157	1	FALSE	FALSE
DB00126	Ascorbic acid	DB00863	Ranitidine	DDI type 15	Ascorbic acid may decrease the excretion rate of Ranitidine which could result in a higher serum level.	0.999732	1	FALSE	FALSE
DB00126	Ascorbic acid	DB00905	Bimatoprost	DDI type 13	The therapeutic efficacy of Bimatoprost can be decreased when used in combination with Ascorbic acid.	0.986731	0	FALSE	FALSE
DB00126	Ascorbic acid	DB00925	Phenoxybenzamine	DDI type 9	The serum concentration of Phenoxybenzamine can be decreased when it is combined with Ascorbic acid.	0.994314	0	FALSE	FALSE
DB00126	Ascorbic acid	DB00946	Phenprocoumon	DDI type 27	The risk or severity of bleeding can be increased when Ascorbic acid is combined with Phenprocoumon.	0.998549	1	FALSE	TRUE
DB00126	Ascorbic acid	DB00951	Isoniazid	DDI type 15	Ascorbic acid may decrease the excretion rate of Isoniazid which could result in a higher serum level.	0.998221	0	FALSE	FALSE
DB00126	Ascorbic acid	DB00952	Naratriptan	DDI type 9	The serum concentration of Naratriptan can be decreased when it is combined with Ascorbic acid.	0.991998	0	FALSE	FALSE
DB00126	Ascorbic acid	DB00952	Naratriptan	DDI type 15	Ascorbic acid may decrease the excretion rate of Naratriptan which could result in a higher serum level.	0.957056	0	FALSE	FALSE
DB00126	Ascorbic acid	DB00983	Formoterol	DDI type 15	Ascorbic acid may decrease the excretion rate of Formoterol which could result in a higher serum level.	0.950368	0	FALSE	FALSE
DB00126	Ascorbic acid	DB00989	Rivastigmine	DDI type 13	The therapeutic efficacy of Rivastigmine can be decreased when used in combination with Ascorbic acid.	0.96536	0	FALSE	FALSE
DB00126	Ascorbic acid	DB01001	Salbutamol	DDI type 15	Ascorbic acid may decrease the excretion rate of Salbutamol which could result in a higher serum level.	0.975067	0	FALSE	FALSE
DB00126	Ascorbic acid	DB01003	Cromoglicic acid	DDI type 26	The risk or severity of adverse effects can be increased when Ascorbic acid is combined with Cromoglicic acid.	0.988157	0	FALSE	TRUE
DB00126	Ascorbic acid	DB01039	Fenofibrate	DDI type 15	Ascorbic acid may decrease the excretion rate of Fenofibrate which could result in a higher serum level.	0.990228	0	FALSE	FALSE
DB00126	Ascorbic acid	DB01043	Memantine	DDI type 15	Ascorbic acid may decrease the excretion rate of Memantine which could result in a higher serum level.	0.968728	0	FALSE	FALSE
DB00126	Ascorbic acid	DB01065	Melatonin	DDI type 9	The serum concentration of Melatonin can be decreased when it is combined with Ascorbic acid.	0.964148	0	FALSE	FALSE
DB00126	Ascorbic acid	DB01068	Clonazepam	DDI type 15	Ascorbic acid may decrease the excretion rate of Clonazepam which could result in a higher serum level.	0.995475	0	FALSE	FALSE
DB00126	Ascorbic acid	DB01097	Leflunomide	DDI type 26	The risk or severity of adverse effects can be increased when Ascorbic acid is combined with Leflunomide.	0.998094	0	FALSE	TRUE
DB00126	Ascorbic acid	DB01137	Levofloxacin	DDI type 15	Ascorbic acid may decrease the excretion rate of Levofloxacin which could result in a higher serum level.	0.968553	0	FALSE	FALSE
DB00126	Ascorbic acid	DB01156	Bupropion	DDI type 9	The serum concentration of Bupropion can be decreased when it is combined with Ascorbic acid.	0.9999	0	FALSE	FALSE
DB00126	Ascorbic acid	DB01156	Bupropion	DDI type 15	Ascorbic acid may decrease the excretion rate of Bupropion which could result in a higher serum level.	0.999522	0	FALSE	FALSE
DB00126	Ascorbic acid	DB01183	Naloxone	DDI type 15	Ascorbic acid may decrease the excretion rate of Naloxone which could result in a higher serum level.	0.999266	0	FALSE	FALSE
DB00126	Ascorbic acid	DB01195	Flecainide	DDI type 9	The serum concentration of Flecainide can be decreased when it is combined with Ascorbic acid.	0.98408	0	FALSE	FALSE
DB00126	Ascorbic acid	DB01195	Flecainide	DDI type 15	Ascorbic acid may decrease the excretion rate of Flecainide which could result in a higher serum level.	0.996396	0	FALSE	FALSE
DB00126	Ascorbic acid	DB01198	Zopiclone	DDI type 15	Ascorbic acid may decrease the excretion rate of Zopiclone which could result in a higher serum level.	0.99934	2	FALSE	FALSE
DB00126	Ascorbic acid	DB01204	Mitoxantrone	DDI type 26	The risk or severity of adverse effects can be increased when Ascorbic acid is combined with Mitoxantrone.	0.990538	2	FALSE	TRUE
DB00126	Ascorbic acid	DB01224	Quetiapine	DDI type 13	The therapeutic efficacy of Quetiapine can be decreased when used in combination with Ascorbic acid.	0.970112	0	FALSE	FALSE
DB00126	Ascorbic acid	DB01233	Metoclopramide	DDI type 9	The serum concentration of Metoclopramide can be decreased when it is combined with Ascorbic acid.	0.998387	0	FALSE	FALSE
DB00126	Ascorbic acid	DB01233	Metoclopramide	DDI type 15	Ascorbic acid may decrease the excretion rate of Metoclopramide which could result in a higher serum level.	0.96758	0	FALSE	FALSE
DB00126	Ascorbic acid	DB01261	Sitagliptin	DDI type 15	Ascorbic acid may decrease the excretion rate of Sitagliptin which could result in a higher serum level.	0.99944	0	FALSE	FALSE
DB00126	Ascorbic acid	DB01422	Nitroxoline	DDI type 15	Ascorbic acid may decrease the excretion rate of Nitroxoline which could result in a higher serum level.	0.99743	0	FALSE	FALSE
DB00126	Ascorbic acid	DB01611	Hydroxychloroquine	DDI type 26	The risk or severity of adverse effects can be increased when Ascorbic acid is combined with Hydroxychloroquine.	0.999514	0	FALSE	TRUE
DB00126	Ascorbic acid	DB01698	Rutin	DDI type 26	The risk or severity of adverse effects can be increased when Ascorbic acid is combined with Rutin.	0.99969	1	FALSE	TRUE
DB00126	Ascorbic acid	DB01783	Pantothenic acid	DDI type 13	The therapeutic efficacy of Pantothenic acid can be decreased when used in combination with Ascorbic acid.	0.998511	3	FALSE	FALSE
DB00126	Ascorbic acid	DB01783	Pantothenic acid	DDI type 15	Ascorbic acid may decrease the excretion rate of Pantothenic acid which could result in a higher serum level.	0.99848	3	FALSE	FALSE
DB00126	Ascorbic acid	DB04573	Estriol	DDI type 13	The therapeutic efficacy of Estriol can be decreased when used in combination with Ascorbic acid.	0.94507	0	FALSE	FALSE
DB00126	Ascorbic acid	DB04703	Hesperidin	DDI type 26	The risk or severity of adverse effects can be increased when Ascorbic acid is combined with Hesperidin.	0.999712	1	FALSE	TRUE
DB00126	Ascorbic acid	DB04896	Milnacipran	DDI type 9	The serum concentration of Milnacipran can be decreased when it is combined with Ascorbic acid.	0.994967	0	FALSE	FALSE
DB00126	Ascorbic acid	DB04896	Milnacipran	DDI type 15	Ascorbic acid may decrease the excretion rate of Milnacipran which could result in a higher serum level.	0.998532	0	FALSE	FALSE
DB00126	Ascorbic acid	DB05541	Brivaracetam	DDI type 15	Ascorbic acid may decrease the excretion rate of Brivaracetam which could result in a higher serum level.	0.962133	0	FALSE	FALSE
DB00126	Ascorbic acid	DB06151	Acetylcysteine	DDI type 15	Ascorbic acid may decrease the excretion rate of Acetylcysteine which could result in a higher serum level.	0.999725	0	FALSE	FALSE
DB00126	Ascorbic acid	DB06228	Rivaroxaban	DDI type 26	The risk or severity of adverse effects can be increased when Ascorbic acid is combined with Rivaroxaban.	0.959453	1	FALSE	TRUE		Bemiparin (DB09258; P00742), Protein S human (DB13149; P00742)
DB00126	Ascorbic acid	DB06228	Rivaroxaban	DDI type 15	Ascorbic acid may decrease the excretion rate of Rivaroxaban which could result in a higher serum level.	0.994104	1	FALSE	FALSE
DB00126	Ascorbic acid	DB06335	Saxagliptin	DDI type 15	Ascorbic acid may decrease the excretion rate of Saxagliptin which could result in a higher serum level.	0.995114	0	FALSE	FALSE
DB00126	Ascorbic acid	DB06594	Agomelatine	DDI type 9	The serum concentration of Agomelatine can be decreased when it is combined with Ascorbic acid.	0.991762	0	FALSE	FALSE
DB00126	Ascorbic acid	DB06605	Apixaban	DDI type 26	The risk or severity of adverse effects can be increased when Ascorbic acid is combined with Apixaban.	0.975619	0	FALSE	TRUE		Heparin (DB01109; P00742), Enoxaparin (DB01225; P00742), Antithrombin Alfa (DB11166; P00742)
DB00126	Ascorbic acid	DB06623	Flupirtine	DDI type 15	Ascorbic acid may decrease the excretion rate of Flupirtine which could result in a higher serum level.	0.99989	0	FALSE	FALSE
DB00126	Ascorbic acid	DB06637	Dalfampridine	DDI type 15	Ascorbic acid may decrease the excretion rate of Dalfampridine which could result in a higher serum level.	0.999683	1	FALSE	FALSE
DB00126	Ascorbic acid	DB06698	Betahistine	DDI type 26	The risk or severity of adverse effects can be increased when Ascorbic acid is combined with Betahistine.	0.995795	0	FALSE	TRUE
DB00126	Ascorbic acid	DB06755	Beta carotene	DDI type 13	The therapeutic efficacy of Beta carotene can be decreased when used in combination with Ascorbic acid.	0.999297	1	FALSE	FALSE
DB00126	Ascorbic acid	DB08816	Ticagrelor	DDI type 13	The therapeutic efficacy of Ticagrelor can be decreased when used in combination with Ascorbic acid.	0.983637	0	FALSE	FALSE
DB00126	Ascorbic acid	DB08818	Hyaluronic acid	DDI type 13	The therapeutic efficacy of Hyaluronic acid can be decreased when used in combination with Ascorbic acid.	0.991718	0	FALSE	FALSE
DB00126	Ascorbic acid	DB08868	Fingolimod	DDI type 69	Ascorbic acid may increase the immunosuppressive activities of Fingolimod.	0.997534	2	FALSE	FALSE
DB00126	Ascorbic acid	DB08880	Teriflunomide	DDI type 26	The risk or severity of adverse effects can be increased when Ascorbic acid is combined with Teriflunomide.	0.948932	1	FALSE	TRUE
DB00126	Ascorbic acid	DB08906	Fluticasone furoate	DDI type 26	The risk or severity of adverse effects can be increased when Ascorbic acid is combined with Fluticasone furoate.	0.994395	0	FALSE	TRUE		Flunisolide (DB00180; P04150), Medrysone (DB00253; P04150), Amcinonide (DB00288; P04150), Fluorometholone (DB00324; P04150), Beclomethasone dipropionate (DB00394; P04150), Fluticasone propionate (DB00588; P04150), Prednisone (DB00635; P04150), Hydrocortisone (DB00741; P04150), Hydrocortamate (DB00769; P04150), Flurandrenolide (DB00846; P04150), Rimexolone (DB00896; P04150), Prednicarbate (DB01130…
DB00126	Ascorbic acid	DB08908	Dimethyl fumarate	DDI type 26	The risk or severity of adverse effects can be increased when Ascorbic acid is combined with Dimethyl fumarate.	0.999857	1	FALSE	TRUE
DB00126	Ascorbic acid	DB09061	Cannabidiol	DDI type 9	The serum concentration of Cannabidiol can be decreased when it is combined with Ascorbic acid.	0.972911	0	FALSE	FALSE
DB00126	Ascorbic acid	DB09123	Dienogest	DDI type 15	Ascorbic acid may decrease the excretion rate of Dienogest which could result in a higher serum level.	0.988657	1	FALSE	FALSE
DB00126	Ascorbic acid	DB09153	Sodium chloride	DDI type 15	Ascorbic acid may decrease the excretion rate of Sodium chloride which could result in a higher serum level.	0.992894	1	FALSE	FALSE
DB00126	Ascorbic acid	DB09268	Picosulfuric acid	DDI type 13	The therapeutic efficacy of Picosulfuric acid can be decreased when used in combination with Ascorbic acid.	0.997242	0	FALSE	FALSE
DB00126	Ascorbic acid	DB09292	Sacubitril	DDI type 15	Ascorbic acid may decrease the excretion rate of Sacubitril which could result in a higher serum level.	0.999582	0	FALSE	FALSE
DB00126	Ascorbic acid	DB09512	Simethicone	DDI type 9	The serum concentration of Simethicone can be decreased when it is combined with Ascorbic acid.	0.999129	0	FALSE	FALSE
DB00126	Ascorbic acid	DB11642	Pitolisant	DDI type 15	Ascorbic acid may decrease the excretion rate of Pitolisant which could result in a higher serum level.	0.997201	0	FALSE	FALSE
DB00126	Ascorbic acid	DB12310	Trehalose	DDI type 13	The therapeutic efficacy of Trehalose can be decreased when used in combination with Ascorbic acid.	0.996006	0	FALSE	FALSE
DB00126	Ascorbic acid	DB12371	Siponimod	DDI type 26	The risk or severity of adverse effects can be increased when Ascorbic acid is combined with Siponimod.	0.978228	0	FALSE	TRUE
DB00126	Ascorbic acid	DB12582	Piperine	DDI type 13	The therapeutic efficacy of Piperine can be decreased when used in combination with Ascorbic acid.	0.986924	1	FALSE	FALSE
DB00126	Ascorbic acid	DB12783	Benserazide	DDI type 15	Ascorbic acid may decrease the excretion rate of Benserazide which could result in a higher serum level.	0.999776	1	FALSE	FALSE
DB00126	Ascorbic acid	DB13178	Inositol	DDI type 26	The risk or severity of adverse effects can be increased when Ascorbic acid is combined with Inositol.	0.999208	0	FALSE	TRUE
DB00126	Ascorbic acid	DB13178	Inositol	DDI type 15	Ascorbic acid may decrease the excretion rate of Inositol which could result in a higher serum level.	0.999476	0	FALSE	FALSE
DB00126	Ascorbic acid	DB13324	Tetrazepam	DDI type 15	Ascorbic acid may decrease the excretion rate of Tetrazepam which could result in a higher serum level.	0.99681	0	FALSE	FALSE
DB00126	Ascorbic acid	DB14219	Monomethyl fumarate	DDI type 26	The risk or severity of adverse effects can be increased when Ascorbic acid is combined with Monomethyl fumarate.	0.99899	0	FALSE	TRUE
DB00126	Ascorbic acid	DB14513	Magnesium	DDI type 9	The serum concentration of Magnesium can be decreased when it is combined with Ascorbic acid.	0.976052	4	FALSE	FALSE
DB00126	Ascorbic acid	DB14634	Fluprednidene acetate	DDI type 26	The risk or severity of adverse effects can be increased when Ascorbic acid is combined with Fluprednidene acetate.	0.999773	0	FALSE	TRUE
DB00126	Ascorbic acid	DB14783	Diroximel fumarate	DDI type 26	The risk or severity of adverse effects can be increased when Ascorbic acid is combined with Diroximel fumarate.	0.999918	0	FALSE	TRUE
DB00126	Ascorbic acid	DB15170	Evobrutinib	DDI type 26	The risk or severity of adverse effects can be increased when Ascorbic acid is combined with Evobrutinib.	0.994711	0	FALSE	TRUE
DB00126	Ascorbic acid	DB16272	Orelabrutinib	DDI type 26	The risk or severity of adverse effects can be increased when Ascorbic acid is combined with Orelabrutinib.	0.958105	0	FALSE	TRUE
DB00134	Methionine	DB00014	Goserelin	DDI type 26	The risk or severity of adverse effects can be increased when Methionine is combined with Goserelin.	0.999707	0	FALSE	TRUE
DB00134	Methionine	DB00121	Biotin	DDI type 26	The risk or severity of adverse effects can be increased when Methionine is combined with Biotin.	0.998102	0	FALSE	TRUE
DB00134	Methionine	DB00122	Choline	DDI type 26	The risk or severity of adverse effects can be increased when Methionine is combined with Choline.	0.996696	0	FALSE	TRUE
DB00134	Methionine	DB00126	Ascorbic acid	DDI type 26	The risk or severity of adverse effects can be increased when Methionine is combined with Ascorbic acid.	0.999253	0	FALSE	TRUE
DB00134	Methionine	DB00137	Lutein	DDI type 26	The risk or severity of adverse effects can be increased when Methionine is combined with Lutein.	0.999922	0	FALSE	TRUE
DB00134	Methionine	DB00140	Riboflavin	DDI type 26	The risk or severity of adverse effects can be increased when Methionine is combined with Riboflavin.	0.999761	0	FALSE	TRUE
DB00134	Methionine	DB00152	Thiamine	DDI type 26	The risk or severity of adverse effects can be increased when Methionine is combined with Thiamine.	0.999791	1	FALSE	TRUE
DB00134	Methionine	DB00162	Vitamin A	DDI type 26	The risk or severity of adverse effects can be increased when Methionine is combined with Vitamin A.	0.999709	0	FALSE	TRUE
DB00134	Methionine	DB00163	Vitamin E	DDI type 26	The risk or severity of adverse effects can be increased when Methionine is combined with Vitamin E.	0.950586	0	FALSE	TRUE
DB00134	Methionine	DB00166	Lipoic acid	DDI type 26	The risk or severity of adverse effects can be increased when Methionine is combined with Lipoic acid.	0.995667	0	FALSE	TRUE
DB00134	Methionine	DB00169	Cholecalciferol	DDI type 26	The risk or severity of adverse effects can be increased when Methionine is combined with Cholecalciferol.	0.999506	4	FALSE	TRUE
DB00134	Methionine	DB00175	Pravastatin	DDI type 26	The risk or severity of adverse effects can be increased when Methionine is combined with Pravastatin.	0.973527	0	FALSE	TRUE
DB00134	Methionine	DB00178	Ramipril	DDI type 26	The risk or severity of adverse effects can be increased when Methionine is combined with Ramipril.	0.994685	3	FALSE	TRUE
DB00134	Methionine	DB00186	Lorazepam	DDI type 26	The risk or severity of adverse effects can be increased when Methionine is combined with Lorazepam.	0.999718	0	FALSE	TRUE
DB00134	Methionine	DB00190	Carbidopa	DDI type 26	The risk or severity of adverse effects can be increased when Methionine is combined with Carbidopa.	0.980696	0	FALSE	TRUE
DB00134	Methionine	DB00193	Tramadol	DDI type 26	The risk or severity of adverse effects can be increased when Methionine is combined with Tramadol.	0.999855	0	FALSE	TRUE
DB00134	Methionine	DB00196	Fluconazole	DDI type 26	The risk or severity of adverse effects can be increased when Methionine is combined with Fluconazole.	0.959721	0	FALSE	TRUE		Miconazole (DB01110; P10613)
DB00134	Methionine	DB00201	Caffeine	DDI type 16	Methionine may increase the excretion rate of Caffeine which could result in a lower serum level and potentially a reduction in efficacy.	0.999381	0	FALSE	FALSE
DB00134	Methionine	DB00209	Trospium	DDI type 26	The risk or severity of adverse effects can be increased when Methionine is combined with Trospium.	0.999856	1	FALSE	TRUE
DB00134	Methionine	DB00209	Trospium	DDI type 54	Methionine may increase the central nervous system depressant (CNS depressant) activities of Trospium.	0.999905	1	FALSE	FALSE
DB00134	Methionine	DB00214	Torasemide	DDI type 26	The risk or severity of adverse effects can be increased when Methionine is combined with Torasemide.	0.98606	0	FALSE	TRUE
DB00134	Methionine	DB00215	Citalopram	DDI type 26	The risk or severity of adverse effects can be increased when Methionine is combined with Citalopram.	0.999981	0	FALSE	TRUE
DB00134	Methionine	DB00222	Glimepiride	DDI type 13	The therapeutic efficacy of Glimepiride can be decreased when used in combination with Methionine.	0.9951	0	FALSE	FALSE
DB00134	Methionine	DB00227	Lovastatin	DDI type 26	The risk or severity of adverse effects can be increased when Methionine is combined with Lovastatin.	0.999396	0	FALSE	TRUE
DB00134	Methionine	DB00230	Pregabalin	DDI type 26	The risk or severity of adverse effects can be increased when Methionine is combined with Pregabalin.	0.999962	1	FALSE	TRUE
DB00134	Methionine	DB00242	Cladribine	DDI type 26	The risk or severity of adverse effects can be increased when Methionine is combined with Cladribine.	0.999887	0	FALSE	TRUE
DB00134	Methionine	DB00264	Metoprolol	DDI type 26	The risk or severity of adverse effects can be increased when Methionine is combined with Metoprolol.	0.998633	1	FALSE	TRUE
DB00134	Methionine	DB00273	Topiramate	DDI type 26	The risk or severity of adverse effects can be increased when Methionine is combined with Topiramate.	0.999609	0	FALSE	TRUE
DB00134	Methionine	DB00277	Theophylline	DDI type 16	Methionine may increase the excretion rate of Theophylline which could result in a lower serum level and potentially a reduction in efficacy.	0.999533	0	FALSE	FALSE
DB00134	Methionine	DB00279	Liothyronine	DDI type 13	The therapeutic efficacy of Liothyronine can be decreased when used in combination with Methionine.	0.977731	0	FALSE	FALSE
DB00134	Methionine	DB00281	Lidocaine	DDI type 26	The risk or severity of adverse effects can be increased when Methionine is combined with Lidocaine.	0.999767	0	FALSE	TRUE
DB00134	Methionine	DB00285	Venlafaxine	DDI type 26	The risk or severity of adverse effects can be increased when Methionine is combined with Venlafaxine.	0.999825	0	FALSE	TRUE
DB00134	Methionine	DB00294	Etonogestrel	DDI type 7	The metabolism of Etonogestrel can be increased when combined with Methionine.	0.999667	0	FALSE	FALSE
DB00134	Methionine	DB00295	Morphine	DDI type 26	The risk or severity of adverse effects can be increased when Methionine is combined with Morphine.	0.999708	0	FALSE	TRUE
DB00134	Methionine	DB00304	Desogestrel	DDI type 7	The metabolism of Desogestrel can be increased when combined with Methionine.	0.999748	0	FALSE	FALSE
DB00134	Methionine	DB00315	Zolmitriptan	DDI type 26	The risk or severity of adverse effects can be increased when Methionine is combined with Zolmitriptan.	0.999977	0	FALSE	TRUE
DB00134	Methionine	DB00316	Acetaminophen	DDI type 7	The metabolism of Acetaminophen can be increased when combined with Methionine.	0.949973	0	FALSE	FALSE
DB00134	Methionine	DB00316	Acetaminophen	DDI type 20	Methionine may increase the hepatotoxic activities of Acetaminophen.	0.95361	0	FALSE	TRUE		Mesalazine (DB00244; P35354|P23219), Salicylic acid (DB00936; P35354|P23219), Meclofenamic acid (DB00939; P35354|P23219), Acetylsalicylic acid (DB00945; P35354|P23219), Ibuprofen (DB01050; P35354|P23219), Lumiracoxib (DB01283; P35354|P23219), Salsalate (DB01399; P35354|P23219)
DB00134	Methionine	DB00318	Codeine	DDI type 26	The risk or severity of adverse effects can be increased when Methionine is combined with Codeine.	0.999871	0	FALSE	TRUE
DB00134	Methionine	DB00321	Amitriptyline	DDI type 26	The risk or severity of adverse effects can be increased when Methionine is combined with Amitriptyline.	0.999927	0	FALSE	TRUE
DB00134	Methionine	DB00321	Amitriptyline	DDI type 54	Methionine may increase the central nervous system depressant (CNS depressant) activities of Amitriptyline.	0.998417	0	FALSE	FALSE
DB00134	Methionine	DB00327	Hydromorphone	DDI type 26	The risk or severity of adverse effects can be increased when Methionine is combined with Hydromorphone.	0.999714	0	FALSE	TRUE
DB00134	Methionine	DB00331	Metformin	DDI type 15	Methionine may decrease the excretion rate of Metformin which could result in a higher serum level.	0.994163	0	FALSE	FALSE
DB00134	Methionine	DB00332	Ipratropium	DDI type 54	Methionine may increase the central nervous system depressant (CNS depressant) activities of Ipratropium.	0.999578	0	FALSE	FALSE
DB00134	Methionine	DB00338	Omeprazole	DDI type 26	The risk or severity of adverse effects can be increased when Methionine is combined with Omeprazole.	0.999015	1	FALSE	TRUE
DB00134	Methionine	DB00341	Cetirizine	DDI type 26	The risk or severity of adverse effects can be increased when Methionine is combined with Cetirizine.	0.999884	0	FALSE	TRUE		Doxylamine (DB00366; P35367), Butriptyline (DB09016; P35367)
DB00134	Methionine	DB00363	Clozapine	DDI type 26	The risk or severity of adverse effects can be increased when Methionine is combined with Clozapine.	0.999939	0	FALSE	TRUE
DB00134	Methionine	DB00363	Clozapine	DDI type 54	Methionine may increase the central nervous system depressant (CNS depressant) activities of Clozapine.	0.999121	0	FALSE	FALSE
DB00134	Methionine	DB00367	Levonorgestrel	DDI type 7	The metabolism of Levonorgestrel can be increased when combined with Methionine.	0.999777	0	FALSE	FALSE
DB00134	Methionine	DB00370	Mirtazapine	DDI type 26	The risk or severity of adverse effects can be increased when Methionine is combined with Mirtazapine.	0.999965	0	FALSE	TRUE
DB00134	Methionine	DB00370	Mirtazapine	DDI type 54	Methionine may increase the central nervous system depressant (CNS depressant) activities of Mirtazapine.	0.973363	0	FALSE	FALSE
DB00134	Methionine	DB00373	Timolol	DDI type 26	The risk or severity of adverse effects can be increased when Methionine is combined with Timolol.	0.999914	0	FALSE	TRUE
DB00134	Methionine	DB00378	Dydrogesterone	DDI type 7	The metabolism of Dydrogesterone can be increased when combined with Methionine.	0.999749	0	FALSE	FALSE
DB00134	Methionine	DB00381	Amlodipine	DDI type 26	The risk or severity of adverse effects can be increased when Methionine is combined with Amlodipine.	0.999822	1	FALSE	TRUE
DB00134	Methionine	DB00391	Sulpiride	DDI type 26	The risk or severity of adverse effects can be increased when Methionine is combined with Sulpiride.	0.999446	0	FALSE	TRUE
DB00134	Methionine	DB00394	Beclomethasone dipropionate	DDI type 26	The risk or severity of adverse effects can be increased when Methionine is combined with Beclomethasone dipropionate.	0.999254	0	FALSE	TRUE
DB00134	Methionine	DB00396	Progesterone	DDI type 7	The metabolism of Progesterone can be increased when combined with Methionine.	0.999724	0	FALSE	FALSE
DB00134	Methionine	DB00401	Nisoldipine	DDI type 26	The risk or severity of adverse effects can be increased when Methionine is combined with Nisoldipine.	0.999651	0	FALSE	TRUE
DB00134	Methionine	DB00413	Pramipexole	DDI type 78	Methionine may increase the sedative activities of Pramipexole.	0.998953	0	FALSE	FALSE
DB00134	Methionine	DB00421	Spironolactone	DDI type 7	The metabolism of Spironolactone can be increased when combined with Methionine.	0.990435	0	FALSE	FALSE
DB00134	Methionine	DB00425	Zolpidem	DDI type 26	The risk or severity of adverse effects can be increased when Methionine is combined with Zolpidem.	0.999785	0	FALSE	TRUE
DB00134	Methionine	DB00425	Zolpidem	DDI type 54	Methionine may increase the central nervous system depressant (CNS depressant) activities of Zolpidem.	0.997613	0	FALSE	FALSE
DB00134	Methionine	DB00440	Trimethoprim	DDI type 15	Methionine may decrease the excretion rate of Trimethoprim which could result in a higher serum level.	0.986736	0	FALSE	FALSE
DB00134	Methionine	DB00443	Betamethasone	DDI type 26	The risk or severity of adverse effects can be increased when Methionine is combined with Betamethasone.	0.999827	0	FALSE	TRUE
DB00134	Methionine	DB00451	Levothyroxine	DDI type 13	The therapeutic efficacy of Levothyroxine can be decreased when used in combination with Methionine.	0.966414	0	FALSE	FALSE
DB00134	Methionine	DB00455	Loratadine	DDI type 26	The risk or severity of adverse effects can be increased when Methionine is combined with Loratadine.	0.998531	0	FALSE	TRUE		Doxylamine (DB00366; P35367), Butriptyline (DB09016; P35367)
DB00134	Methionine	DB00468	Quinine	DDI type 26	The risk or severity of adverse effects can be increased when Methionine is combined with Quinine.	0.999892	0	FALSE	TRUE
DB00134	Methionine	DB00472	Fluoxetine	DDI type 26	The risk or severity of adverse effects can be increased when Methionine is combined with Fluoxetine.	0.999985	0	FALSE	TRUE
DB00134	Methionine	DB00472	Fluoxetine	DDI type 54	Methionine may increase the central nervous system depressant (CNS depressant) activities of Fluoxetine.	0.999778	0	FALSE	FALSE
DB00134	Methionine	DB00476	Duloxetine	DDI type 26	The risk or severity of adverse effects can be increased when Methionine is combined with Duloxetine.	0.999972	0	FALSE	TRUE
DB00134	Methionine	DB00496	Darifenacin	DDI type 26	The risk or severity of adverse effects can be increased when Methionine is combined with Darifenacin.	0.99853	0	FALSE	TRUE		Ipratropium (DB00332; P20309), Butylscopolamine (DB09300; P20309)
DB00134	Methionine	DB00496	Darifenacin	DDI type 54	Methionine may increase the central nervous system depressant (CNS depressant) activities of Darifenacin.	0.999569	0	FALSE	FALSE
DB00134	Methionine	DB00497	Oxycodone	DDI type 26	The risk or severity of adverse effects can be increased when Methionine is combined with Oxycodone.	0.999747	0	FALSE	TRUE		Opium (DB11130; P35372|P41145|P41143)
DB00134	Methionine	DB00528	Lercanidipine	DDI type 26	The risk or severity of adverse effects can be increased when Methionine is combined with Lercanidipine.	0.973383	0	FALSE	TRUE
DB00134	Methionine	DB00537	Ciprofloxacin	DDI type 26	The risk or severity of adverse effects can be increased when Methionine is combined with Ciprofloxacin.	0.996282	0	FALSE	TRUE		Trovafloxacin (DB00685; P43702|P43700)
DB00134	Methionine	DB00555	Lamotrigine	DDI type 26	The risk or severity of adverse effects can be increased when Methionine is combined with Lamotrigine.	0.998181	0	FALSE	TRUE
DB00134	Methionine	DB00555	Lamotrigine	DDI type 54	Methionine may increase the central nervous system depressant (CNS depressant) activities of Lamotrigine.	0.99773	0	FALSE	FALSE
DB00134	Methionine	DB00563	Methotrexate	DDI type 26	The risk or severity of adverse effects can be increased when Methionine is combined with Methotrexate.	0.99815	0	FALSE	TRUE
DB00134	Methionine	DB00564	Carbamazepine	DDI type 26	The risk or severity of adverse effects can be increased when Methionine is combined with Carbamazepine.	0.999936	1	FALSE	TRUE
DB00134	Methionine	DB00568	Cinnarizine	DDI type 26	The risk or severity of adverse effects can be increased when Methionine is combined with Cinnarizine.	0.999114	0	FALSE	TRUE
DB00134	Methionine	DB00571	Propranolol	DDI type 26	The risk or severity of adverse effects can be increased when Methionine is combined with Propranolol.	0.999972	0	FALSE	TRUE
DB00134	Methionine	DB00581	Lactulose	DDI type 13	The therapeutic efficacy of Lactulose can be decreased when used in combination with Methionine.	0.996601	1	FALSE	FALSE
DB00134	Methionine	DB00583	Levocarnitine	DDI type 26	The risk or severity of adverse effects can be increased when Methionine is combined with Levocarnitine.	0.986412	0	FALSE	TRUE
DB00134	Methionine	DB00584	Enalapril	DDI type 26	The risk or severity of adverse effects can be increased when Methionine is combined with Enalapril.	0.999769	0	FALSE	TRUE
DB00134	Methionine	DB00588	Fluticasone propionate	DDI type 26	The risk or severity of adverse effects can be increased when Methionine is combined with Fluticasone propionate.	0.999828	0	FALSE	TRUE
DB00134	Methionine	DB00590	Doxazosin	DDI type 26	The risk or severity of adverse effects can be increased when Methionine is combined with Doxazosin.	0.99992	0	FALSE	TRUE
DB00134	Methionine	DB00594	Amiloride	DDI type 26	The risk or severity of adverse effects can be increased when Methionine is combined with Amiloride.	0.957703	0	FALSE	TRUE
DB00134	Methionine	DB00612	Bisoprolol	DDI type 26	The risk or severity of adverse effects can be increased when Methionine is combined with Bisoprolol.	0.959213	2	FALSE	TRUE
DB00134	Methionine	DB00630	Alendronic acid	DDI type 26	The risk or severity of adverse effects can be increased when Methionine is combined with Alendronic acid.	0.996078	2	FALSE	TRUE		Ibandronate (DB00710; P14324|Hydroxylapatite)
DB00134	Methionine	DB00635	Prednisone	DDI type 26	The risk or severity of adverse effects can be increased when Methionine is combined with Prednisone.	0.998923	0	FALSE	TRUE
DB00134	Methionine	DB00641	Simvastatin	DDI type 26	The risk or severity of adverse effects can be increased when Methionine is combined with Simvastatin.	0.998347	2	FALSE	TRUE
DB00134	Methionine	DB00654	Latanoprost	DDI type 26	The risk or severity of adverse effects can be increased when Methionine is combined with Latanoprost.	0.997133	0	FALSE	TRUE
DB00134	Methionine	DB00656	Trazodone	DDI type 26	The risk or severity of adverse effects can be increased when Methionine is combined with Trazodone.	0.99999	0	FALSE	TRUE
DB00134	Methionine	DB00669	Sumatriptan	DDI type 26	The risk or severity of adverse effects can be increased when Methionine is combined with Sumatriptan.	0.999932	0	FALSE	TRUE
DB00134	Methionine	DB00675	Tamoxifen	DDI type 7	The metabolism of Tamoxifen can be increased when combined with Methionine.	0.998561	0	FALSE	FALSE
DB00134	Methionine	DB00678	Losartan	DDI type 26	The risk or severity of adverse effects can be increased when Methionine is combined with Losartan.	0.999544	0	FALSE	TRUE
DB00134	Methionine	DB00687	Fludrocortisone	DDI type 26	The risk or severity of adverse effects can be increased when Methionine is combined with Fludrocortisone.	0.999907	0	FALSE	TRUE
DB00134	Methionine	DB00697	Tizanidine	DDI type 26	The risk or severity of adverse effects can be increased when Methionine is combined with Tizanidine.	0.999874	1	FALSE	TRUE
DB00134	Methionine	DB00698	Nitrofurantoin	DDI type 26	The risk or severity of adverse effects can be increased when Methionine is combined with Nitrofurantoin.	0.99964	0	FALSE	TRUE
DB00134	Methionine	DB00706	Tamsulosin	DDI type 26	The risk or severity of adverse effects can be increased when Methionine is combined with Tamsulosin.	0.99993	0	FALSE	TRUE
DB00134	Methionine	DB00715	Paroxetine	DDI type 26	The risk or severity of adverse effects can be increased when Methionine is combined with Paroxetine.	0.999961	0	FALSE	TRUE
DB00134	Methionine	DB00717	Norethisterone	DDI type 7	The metabolism of Norethisterone can be increased when combined with Methionine.	0.999884	0	FALSE	FALSE
DB00134	Methionine	DB00722	Lisinopril	DDI type 26	The risk or severity of adverse effects can be increased when Methionine is combined with Lisinopril.	0.997707	0	FALSE	TRUE
DB00134	Methionine	DB00726	Trimipramine	DDI type 26	The risk or severity of adverse effects can be increased when Methionine is combined with Trimipramine.	0.999982	0	FALSE	TRUE
DB00134	Methionine	DB00727	Nitroglycerin	DDI type 26	The risk or severity of adverse effects can be increased when Methionine is combined with Nitroglycerin.	0.998765	0	FALSE	TRUE
DB00134	Methionine	DB00736	Esomeprazole	DDI type 26	The risk or severity of adverse effects can be increased when Methionine is combined with Esomeprazole.	0.999295	0	FALSE	TRUE
DB00134	Methionine	DB00741	Hydrocortisone	DDI type 26	The risk or severity of adverse effects can be increased when Methionine is combined with Hydrocortisone.	0.999797	0	FALSE	TRUE
DB00134	Methionine	DB00745	Modafinil	DDI type 26	The risk or severity of adverse effects can be increased when Methionine is combined with Modafinil.	0.942686	0	FALSE	TRUE
DB00134	Methionine	DB00764	Mometasone	DDI type 26	The risk or severity of adverse effects can be increased when Methionine is combined with Mometasone.	0.999854	0	FALSE	TRUE
DB00134	Methionine	DB00776	Oxcarbazepine	DDI type 26	The risk or severity of adverse effects can be increased when Methionine is combined with Oxcarbazepine.	0.999817	0	FALSE	TRUE
DB00134	Methionine	DB00783	Estradiol	DDI type 7	The metabolism of Estradiol can be increased when combined with Methionine.	0.999048	0	FALSE	FALSE
DB00134	Methionine	DB00788	Naproxen	DDI type 7	The metabolism of Naproxen can be increased when combined with Methionine.	0.97025	0	FALSE	FALSE
DB00134	Methionine	DB00790	Perindopril	DDI type 26	The risk or severity of adverse effects can be increased when Methionine is combined with Perindopril.	0.998968	0	FALSE	TRUE
DB00134	Methionine	DB00794	Primidone	DDI type 26	The risk or severity of adverse effects can be increased when Methionine is combined with Primidone.	0.999777	0	FALSE	TRUE
DB00134	Methionine	DB00813	Fentanyl	DDI type 26	The risk or severity of adverse effects can be increased when Methionine is combined with Fentanyl.	0.999743	0	FALSE	TRUE		Opium (DB11130; P35372|P41143)
DB00134	Methionine	DB00820	Tadalafil	DDI type 26	The risk or severity of adverse effects can be increased when Methionine is combined with Tadalafil.	0.999939	0	FALSE	TRUE		Theophylline (DB00277; O76074)
DB00134	Methionine	DB00829	Diazepam	DDI type 26	The risk or severity of adverse effects can be increased when Methionine is combined with Diazepam.	0.999498	0	FALSE	TRUE
DB00134	Methionine	DB00860	Prednisolone	DDI type 26	The risk or severity of adverse effects can be increased when Methionine is combined with Prednisolone.	0.999917	0	FALSE	TRUE
DB00134	Methionine	DB00869	Dorzolamide	DDI type 26	The risk or severity of adverse effects can be increased when Methionine is combined with Dorzolamide.	0.971858	0	FALSE	TRUE
DB00134	Methionine	DB00876	Eprosartan	DDI type 26	The risk or severity of adverse effects can be increased when Methionine is combined with Eprosartan.	0.998655	0	FALSE	TRUE
DB00134	Methionine	DB00904	Ondansetron	DDI type 26	The risk or severity of adverse effects can be increased when Methionine is combined with Ondansetron.	0.999963	1	FALSE	TRUE
DB00134	Methionine	DB00905	Bimatoprost	DDI type 26	The risk or severity of adverse effects can be increased when Methionine is combined with Bimatoprost.	0.999436	0	FALSE	TRUE
DB00134	Methionine	DB00925	Phenoxybenzamine	DDI type 26	The risk or severity of adverse effects can be increased when Methionine is combined with Phenoxybenzamine.	0.99997	0	FALSE	TRUE
DB00134	Methionine	DB00946	Phenprocoumon	DDI type 26	The risk or severity of adverse effects can be increased when Methionine is combined with Phenprocoumon.	0.9463	0	FALSE	TRUE
DB00134	Methionine	DB00950	Fexofenadine	DDI type 26	The risk or severity of adverse effects can be increased when Methionine is combined with Fexofenadine.	0.999805	0	FALSE	TRUE		Doxylamine (DB00366; P35367), Butriptyline (DB09016; P35367)
DB00134	Methionine	DB00951	Isoniazid	DDI type 26	The risk or severity of adverse effects can be increased when Methionine is combined with Isoniazid.	0.974494	0	FALSE	TRUE
DB00134	Methionine	DB00952	Naratriptan	DDI type 26	The risk or severity of adverse effects can be increased when Methionine is combined with Naratriptan.	0.999772	0	FALSE	TRUE
DB00134	Methionine	DB00953	Rizatriptan	DDI type 26	The risk or severity of adverse effects can be increased when Methionine is combined with Rizatriptan.	0.999749	0	FALSE	TRUE
DB00134	Methionine	DB00957	Norgestimate	DDI type 7	The metabolism of Norgestimate can be increased when combined with Methionine.	0.999606	0	FALSE	FALSE
DB00134	Methionine	DB00959	Methylprednisolone	DDI type 26	The risk or severity of adverse effects can be increased when Methionine is combined with Methylprednisolone.	0.999908	2	FALSE	TRUE
DB00134	Methionine	DB00966	Telmisartan	DDI type 26	The risk or severity of adverse effects can be increased when Methionine is combined with Telmisartan.	0.999718	0	FALSE	TRUE
DB00134	Methionine	DB00967	Desloratadine	DDI type 26	The risk or severity of adverse effects can be increased when Methionine is combined with Desloratadine.	0.999978	0	FALSE	TRUE		Doxylamine (DB00366; P35367), Butriptyline (DB09016; P35367)
DB00134	Methionine	DB00973	Ezetimibe	DDI type 26	The risk or severity of adverse effects can be increased when Methionine is combined with Ezetimibe.	0.991801	0	FALSE	TRUE
DB00134	Methionine	DB00977	Ethinylestradiol	DDI type 7	The metabolism of Ethinylestradiol can be increased when combined with Methionine.	0.99962	0	FALSE	FALSE
DB00134	Methionine	DB00979	Cyclopentolate	DDI type 26	The risk or severity of adverse effects can be increased when Methionine is combined with Cyclopentolate.	0.999848	0	FALSE	TRUE		Ipratropium (DB00332; P11229)
DB00134	Methionine	DB00983	Formoterol	DDI type 26	The risk or severity of adverse effects can be increased when Methionine is combined with Formoterol.	0.99975	0	FALSE	TRUE		Racepinephrine (DB11124; P07550)
DB00134	Methionine	DB00985	Dimenhydrinate	DDI type 26	The risk or severity of adverse effects can be increased when Methionine is combined with Dimenhydrinate.	0.99998	0	FALSE	TRUE		Doxylamine (DB00366; P35367), Butriptyline (DB09016; P35367)
DB00134	Methionine	DB00989	Rivastigmine	DDI type 26	The risk or severity of adverse effects can be increased when Methionine is combined with Rivastigmine.	0.994695	0	FALSE	TRUE
DB00134	Methionine	DB00993	Azathioprine	DDI type 26	The risk or severity of adverse effects can be increased when Methionine is combined with Azathioprine.	0.997459	0	FALSE	TRUE
DB00134	Methionine	DB00996	Gabapentin	DDI type 26	The risk or severity of adverse effects can be increased when Methionine is combined with Gabapentin.	0.999917	1	FALSE	TRUE
DB00134	Methionine	DB00999	Hydrochlorothiazide	DDI type 26	The risk or severity of adverse effects can be increased when Methionine is combined with Hydrochlorothiazide.	0.999641	0	FALSE	TRUE
DB00134	Methionine	DB01001	Salbutamol	DDI type 26	The risk or severity of adverse effects can be increased when Methionine is combined with Salbutamol.	0.996702	0	FALSE	TRUE		Racepinephrine (DB11124; P07550)
DB00134	Methionine	DB01003	Cromoglicic acid	DDI type 26	The risk or severity of adverse effects can be increased when Methionine is combined with Cromoglicic acid.	0.965119	0	FALSE	TRUE
DB00134	Methionine	DB01019	Bethanechol	DDI type 26	The risk or severity of adverse effects can be increased when Methionine is combined with Bethanechol.	0.999972	0	FALSE	TRUE
DB00134	Methionine	DB01036	Tolterodine	DDI type 54	Methionine may increase the central nervous system depressant (CNS depressant) activities of Tolterodine.	0.993563	0	FALSE	FALSE
DB00134	Methionine	DB01039	Fenofibrate	DDI type 7	The metabolism of Fenofibrate can be increased when combined with Methionine.	0.987646	0	FALSE	FALSE
DB00134	Methionine	DB01043	Memantine	DDI type 26	The risk or severity of adverse effects can be increased when Methionine is combined with Memantine.	0.993719	0	FALSE	TRUE
DB00134	Methionine	DB01062	Oxybutynin	DDI type 26	The risk or severity of adverse effects can be increased when Methionine is combined with Oxybutynin.	0.998268	2	FALSE	TRUE		Ipratropium (DB00332; P20309|P08172|P11229)
DB00134	Methionine	DB01062	Oxybutynin	DDI type 54	Methionine may increase the central nervous system depressant (CNS depressant) activities of Oxybutynin.	0.996759	2	FALSE	FALSE
DB00134	Methionine	DB01065	Melatonin	DDI type 26	The risk or severity of adverse effects can be increased when Methionine is combined with Melatonin.	0.99997	0	FALSE	TRUE
DB00134	Methionine	DB01068	Clonazepam	DDI type 26	The risk or severity of adverse effects can be increased when Methionine is combined with Clonazepam.	0.99996	0	FALSE	TRUE
DB00134	Methionine	DB01070	Dihydrotachysterol	DDI type 26	The risk or severity of adverse effects can be increased when Methionine is combined with Dihydrotachysterol.	0.99514	0	FALSE	TRUE
DB00134	Methionine	DB01070	Dihydrotachysterol	DDI type 54	Methionine may increase the central nervous system depressant (CNS depressant) activities of Dihydrotachysterol.	0.977777	0	FALSE	FALSE
DB00134	Methionine	DB01075	Diphenhydramine	DDI type 26	The risk or severity of adverse effects can be increased when Methionine is combined with Diphenhydramine.	0.999961	0	FALSE	TRUE		Doxylamine (DB00366; P35367), Butriptyline (DB09016; P35367)
DB00134	Methionine	DB01075	Diphenhydramine	DDI type 54	Methionine may increase the central nervous system depressant (CNS depressant) activities of Diphenhydramine.	0.980605	0	FALSE	FALSE
DB00134	Methionine	DB01076	Atorvastatin	DDI type 26	The risk or severity of adverse effects can be increased when Methionine is combined with Atorvastatin.	0.999298	0	FALSE	TRUE
DB00134	Methionine	DB01086	Benzocaine	DDI type 26	The risk or severity of adverse effects can be increased when Methionine is combined with Benzocaine.	0.997093	0	FALSE	TRUE
DB00134	Methionine	DB01095	Fluvastatin	DDI type 26	The risk or severity of adverse effects can be increased when Methionine is combined with Fluvastatin.	0.999907	0	FALSE	TRUE
DB00134	Methionine	DB01097	Leflunomide	DDI type 26	The risk or severity of adverse effects can be increased when Methionine is combined with Leflunomide.	0.999586	0	FALSE	TRUE
DB00134	Methionine	DB01098	Rosuvastatin	DDI type 26	The risk or severity of adverse effects can be increased when Methionine is combined with Rosuvastatin.	0.999427	0	FALSE	TRUE
DB00134	Methionine	DB01104	Sertraline	DDI type 26	The risk or severity of adverse effects can be increased when Methionine is combined with Sertraline.	0.999984	0	FALSE	TRUE
DB00134	Methionine	DB01114	Chlorpheniramine	DDI type 26	The risk or severity of adverse effects can be increased when Methionine is combined with Chlorpheniramine.	0.99992	0	FALSE	TRUE		Doxylamine (DB00366; P35367), Butriptyline (DB09016; P35367)
DB00134	Methionine	DB01128	Bicalutamide	DDI type 26	The risk or severity of adverse effects can be increased when Methionine is combined with Bicalutamide.	0.99882	0	FALSE	TRUE		Drospirenone (DB01395; P10275), Apalutamide (DB11901; P10275)
DB00134	Methionine	DB01128	Bicalutamide	DDI type 6	The metabolism of Bicalutamide can be decreased when combined with Methionine.	0.987807	0	FALSE	FALSE
DB00134	Methionine	DB01136	Carvedilol	DDI type 26	The risk or severity of adverse effects can be increased when Methionine is combined with Carvedilol.	0.99998	0	FALSE	TRUE
DB00134	Methionine	DB01137	Levofloxacin	DDI type 15	Methionine may decrease the excretion rate of Levofloxacin which could result in a higher serum level.	0.960912	0	FALSE	FALSE
DB00134	Methionine	DB01142	Doxepin	DDI type 26	The risk or severity of adverse effects can be increased when Methionine is combined with Doxepin.	0.999977	1	FALSE	TRUE
DB00134	Methionine	DB01142	Doxepin	DDI type 54	Methionine may increase the central nervous system depressant (CNS depressant) activities of Doxepin.	0.997669	1	FALSE	FALSE
DB00134	Methionine	DB01156	Bupropion	DDI type 26	The risk or severity of adverse effects can be increased when Methionine is combined with Bupropion.	0.999982	0	FALSE	TRUE
DB00134	Methionine	DB01162	Terazosin	DDI type 26	The risk or severity of adverse effects can be increased when Methionine is combined with Terazosin.	0.999933	0	FALSE	TRUE
DB00134	Methionine	DB01175	Escitalopram	DDI type 26	The risk or severity of adverse effects can be increased when Methionine is combined with Escitalopram.	0.999981	0	FALSE	TRUE
DB00134	Methionine	DB01183	Naloxone	DDI type 26	The risk or severity of adverse effects can be increased when Methionine is combined with Naloxone.	0.99624	0	FALSE	TRUE
DB00134	Methionine	DB01194	Brinzolamide	DDI type 26	The risk or severity of adverse effects can be increased when Methionine is combined with Brinzolamide.	0.998793	0	FALSE	TRUE		Sodium sulfate (DB09472; P00918)
DB00134	Methionine	DB01195	Flecainide	DDI type 26	The risk or severity of adverse effects can be increased when Methionine is combined with Flecainide.	0.998823	0	FALSE	TRUE
DB00134	Methionine	DB01197	Captopril	DDI type 26	The risk or severity of adverse effects can be increased when Methionine is combined with Captopril.	0.995841	0	FALSE	TRUE
DB00134	Methionine	DB01198	Zopiclone	DDI type 26	The risk or severity of adverse effects can be increased when Methionine is combined with Zopiclone.	0.999959	1	FALSE	TRUE
DB00134	Methionine	DB01202	Levetiracetam	DDI type 26	The risk or severity of adverse effects can be increased when Methionine is combined with Levetiracetam.	0.999892	0	FALSE	TRUE
DB00134	Methionine	DB01204	Mitoxantrone	DDI type 26	The risk or severity of adverse effects can be increased when Methionine is combined with Mitoxantrone.	0.999874	1	FALSE	TRUE
DB00134	Methionine	DB01216	Finasteride	DDI type 26	The risk or severity of adverse effects can be increased when Methionine is combined with Finasteride.	0.999925	0	FALSE	TRUE
DB00134	Methionine	DB01222	Budesonide	DDI type 26	The risk or severity of adverse effects can be increased when Methionine is combined with Budesonide.	0.999876	0	FALSE	TRUE
DB00134	Methionine	DB01224	Quetiapine	DDI type 26	The risk or severity of adverse effects can be increased when Methionine is combined with Quetiapine.	0.999972	0	FALSE	TRUE
DB00134	Methionine	DB01224	Quetiapine	DDI type 54	Methionine may increase the central nervous system depressant (CNS depressant) activities of Quetiapine.	0.99975	0	FALSE	FALSE
DB00134	Methionine	DB01233	Metoclopramide	DDI type 26	The risk or severity of adverse effects can be increased when Methionine is combined with Metoclopramide.	0.999983	0	FALSE	TRUE
DB00134	Methionine	DB01234	Dexamethasone	DDI type 26	The risk or severity of adverse effects can be increased when Methionine is combined with Dexamethasone.	0.999827	0	FALSE	TRUE
DB00134	Methionine	DB01261	Sitagliptin	DDI type 26	The risk or severity of adverse effects can be increased when Methionine is combined with Sitagliptin.	0.988702	0	FALSE	TRUE
DB00134	Methionine	DB01288	Fenoterol	DDI type 26	The risk or severity of adverse effects can be increased when Methionine is combined with Fenoterol.	0.998592	0	FALSE	TRUE		Racepinephrine (DB11124; P07550)
DB00134	Methionine	DB01390	Sodium bicarbonate	DDI type 15	Methionine may decrease the excretion rate of Sodium bicarbonate which could result in a higher serum level.	0.991555	0	FALSE	FALSE
DB00134	Methionine	DB01395	Drospirenone	DDI type 7	The metabolism of Drospirenone can be increased when combined with Methionine.	0.999083	0	FALSE	FALSE
DB00134	Methionine	DB01409	Tiotropium	DDI type 26	The risk or severity of adverse effects can be increased when Methionine is combined with Tiotropium.	0.991846	0	FALSE	TRUE		Ipratropium (DB00332; P20309), Butylscopolamine (DB09300; P20309)
DB00134	Methionine	DB01409	Tiotropium	DDI type 54	Methionine may increase the central nervous system depressant (CNS depressant) activities of Tiotropium.	0.999054	0	FALSE	FALSE
DB00134	Methionine	DB01422	Nitroxoline	DDI type 26	The risk or severity of adverse effects can be increased when Methionine is combined with Nitroxoline.	0.996279	0	FALSE	TRUE
DB00134	Methionine	DB01436	Alfacalcidol	DDI type 26	The risk or severity of adverse effects can be increased when Methionine is combined with Alfacalcidol.	0.999655	0	FALSE	TRUE
DB00134	Methionine	DB01586	Ursodeoxycholic acid	DDI type 26	The risk or severity of adverse effects can be increased when Methionine is combined with Ursodeoxycholic acid.	0.999072	0	FALSE	TRUE
DB00134	Methionine	DB01591	Solifenacin	DDI type 26	The risk or severity of adverse effects can be increased when Methionine is combined with Solifenacin.	0.999965	0	FALSE	TRUE		Ipratropium (DB00332; P20309), Butylscopolamine (DB09300; P20309)
DB00134	Methionine	DB01591	Solifenacin	DDI type 54	Methionine may increase the central nervous system depressant (CNS depressant) activities of Solifenacin.	0.999928	0	FALSE	FALSE
DB00134	Methionine	DB01611	Hydroxychloroquine	DDI type 26	The risk or severity of adverse effects can be increased when Methionine is combined with Hydroxychloroquine.	0.999873	0	FALSE	TRUE
DB00134	Methionine	DB01698	Rutin	DDI type 26	The risk or severity of adverse effects can be increased when Methionine is combined with Rutin.	0.999541	0	FALSE	TRUE
DB00134	Methionine	DB01783	Pantothenic acid	DDI type 26	The risk or severity of adverse effects can be increased when Methionine is combined with Pantothenic acid.	0.999533	0	FALSE	TRUE
DB00134	Methionine	DB02300	Calcipotriol	DDI type 15	Methionine may decrease the excretion rate of Calcipotriol which could result in a higher serum level.	0.957889	0	FALSE	FALSE
DB00134	Methionine	DB02714	3'-Uridinemonophosphate	DDI type 26	The risk or severity of adverse effects can be increased when Methionine is combined with 3'-Uridinemonophosphate.	0.999764	0	FALSE	TRUE
DB00134	Methionine	DB04398	Lactic acid	DDI type 26	The risk or severity of adverse effects can be increased when Methionine is combined with Lactic acid.	0.973886	0	FALSE	TRUE
DB00134	Methionine	DB04573	Estriol	DDI type 7	The metabolism of Estriol can be increased when combined with Methionine.	0.990141	0	FALSE	FALSE
DB00134	Methionine	DB04703	Hesperidin	DDI type 26	The risk or severity of adverse effects can be increased when Methionine is combined with Hesperidin.	0.999776	0	FALSE	TRUE
DB00134	Methionine	DB04861	Nebivolol	DDI type 26	The risk or severity of adverse effects can be increased when Methionine is combined with Nebivolol.	0.999711	0	FALSE	TRUE
DB00134	Methionine	DB04896	Milnacipran	DDI type 26	The risk or severity of adverse effects can be increased when Methionine is combined with Milnacipran.	0.99999	0	FALSE	TRUE
DB00134	Methionine	DB05271	Rotigotine	DDI type 78	Methionine may increase the sedative activities of Rotigotine.	0.999845	0	FALSE	FALSE
DB00134	Methionine	DB05541	Brivaracetam	DDI type 26	The risk or severity of adverse effects can be increased when Methionine is combined with Brivaracetam.	0.999967	0	FALSE	TRUE
DB00134	Methionine	DB06148	Mianserin	DDI type 26	The risk or severity of adverse effects can be increased when Methionine is combined with Mianserin.	0.999968	0	FALSE	TRUE
DB00134	Methionine	DB06151	Acetylcysteine	DDI type 26	The risk or severity of adverse effects can be increased when Methionine is combined with Acetylcysteine.	0.995938	0	FALSE	TRUE
DB00134	Methionine	DB06228	Rivaroxaban	DDI type 26	The risk or severity of adverse effects can be increased when Methionine is combined with Rivaroxaban.	0.999882	0	FALSE	TRUE		Bemiparin (DB09258; P00742), Protein S human (DB13149; P00742)
DB00134	Methionine	DB06264	Tolperisone	DDI type 26	The risk or severity of adverse effects can be increased when Methionine is combined with Tolperisone.	0.999972	0	FALSE	TRUE
DB00134	Methionine	DB06335	Saxagliptin	DDI type 26	The risk or severity of adverse effects can be increased when Methionine is combined with Saxagliptin.	0.999321	0	FALSE	TRUE
DB00134	Methionine	DB06594	Agomelatine	DDI type 26	The risk or severity of adverse effects can be increased when Methionine is combined with Agomelatine.	0.999954	0	FALSE	TRUE
DB00134	Methionine	DB06605	Apixaban	DDI type 26	The risk or severity of adverse effects can be increased when Methionine is combined with Apixaban.	0.999823	0	FALSE	TRUE		Heparin (DB01109; P00742), Enoxaparin (DB01225; P00742), Antithrombin Alfa (DB11166; P00742)
DB00134	Methionine	DB06623	Flupirtine	DDI type 26	The risk or severity of adverse effects can be increased when Methionine is combined with Flupirtine.	0.999893	0	FALSE	TRUE
DB00134	Methionine	DB06698	Betahistine	DDI type 26	The risk or severity of adverse effects can be increased when Methionine is combined with Betahistine.	0.999693	0	FALSE	TRUE
DB00134	Methionine	DB06755	Beta carotene	DDI type 26	The risk or severity of adverse effects can be increased when Methionine is combined with Beta carotene.	0.999784	0	FALSE	TRUE		Tocopherol (DB11251; Free radicals), alpha-Tocopherol acetate (DB14003; Free radicals)
DB00134	Methionine	DB06825	Triptorelin	DDI type 26	The risk or severity of adverse effects can be increased when Methionine is combined with Triptorelin.	0.990153	0	FALSE	TRUE
DB00134	Methionine	DB08801	Dimetindene	DDI type 26	The risk or severity of adverse effects can be increased when Methionine is combined with Dimetindene.	0.999803	0	FALSE	TRUE
DB00134	Methionine	DB08801	Dimetindene	DDI type 54	Methionine may increase the central nervous system depressant (CNS depressant) activities of Dimetindene.	0.986094	0	FALSE	FALSE
DB00134	Methionine	DB08868	Fingolimod	DDI type 69	Methionine may increase the immunosuppressive activities of Fingolimod.	0.99781	0	FALSE	FALSE
DB00134	Methionine	DB08880	Teriflunomide	DDI type 26	The risk or severity of adverse effects can be increased when Methionine is combined with Teriflunomide.	0.999792	0	FALSE	TRUE
DB00134	Methionine	DB08893	Mirabegron	DDI type 26	The risk or severity of adverse effects can be increased when Methionine is combined with Mirabegron.	0.997726	0	FALSE	TRUE		Racepinephrine (DB11124; P13945)
DB00134	Methionine	DB08906	Fluticasone furoate	DDI type 26	The risk or severity of adverse effects can be increased when Methionine is combined with Fluticasone furoate.	0.999934	0	FALSE	TRUE
DB00134	Methionine	DB08908	Dimethyl fumarate	DDI type 26	The risk or severity of adverse effects can be increased when Methionine is combined with Dimethyl fumarate.	0.998642	0	FALSE	TRUE
DB00134	Methionine	DB08984	Etofenamate	DDI type 26	The risk or severity of adverse effects can be increased when Methionine is combined with Etofenamate.	0.997011	0	FALSE	TRUE
DB00134	Methionine	DB09020	Bisacodyl	DDI type 13	The therapeutic efficacy of Bisacodyl can be decreased when used in combination with Methionine.	0.995834	0	FALSE	FALSE
DB00134	Methionine	DB09026	Aliskiren	DDI type 26	The risk or severity of adverse effects can be increased when Methionine is combined with Aliskiren.	0.9996	0	FALSE	TRUE
DB00134	Methionine	DB09061	Cannabidiol	DDI type 26	The risk or severity of adverse effects can be increased when Methionine is combined with Cannabidiol.	0.988036	1	FALSE	TRUE
DB00134	Methionine	DB09070	Tibolone	DDI type 7	The metabolism of Tibolone can be increased when combined with Methionine.	0.997649	0	FALSE	FALSE
DB00134	Methionine	DB09082	Vilanterol	DDI type 26	The risk or severity of adverse effects can be increased when Methionine is combined with Vilanterol.	0.999767	0	FALSE	TRUE		Racepinephrine (DB11124; P07550)
DB00134	Methionine	DB09083	Ivabradine	DDI type 52	Methionine may increase the bradycardic activities of Ivabradine.	0.97822	0	FALSE	FALSE
DB00134	Methionine	DB09123	Dienogest	DDI type 7	The metabolism of Dienogest can be increased when combined with Methionine.	0.99863	0	FALSE	FALSE
DB00134	Methionine	DB09124	Medrogestone	DDI type 7	The metabolism of Medrogestone can be increased when combined with Methionine.	0.997393	0	FALSE	FALSE
DB00134	Methionine	DB09153	Sodium chloride	DDI type 13	The therapeutic efficacy of Sodium chloride can be decreased when used in combination with Methionine.	0.99144	0	FALSE	FALSE
DB00134	Methionine	DB09153	Sodium chloride	DDI type 15	Methionine may decrease the excretion rate of Sodium chloride which could result in a higher serum level.	0.999838	0	FALSE	FALSE
DB00134	Methionine	DB09242	Moxonidine	DDI type 26	The risk or severity of adverse effects can be increased when Methionine is combined with Moxonidine.	0.999606	0	FALSE	TRUE
DB00134	Methionine	DB09268	Picosulfuric acid	DDI type 13	The therapeutic efficacy of Picosulfuric acid can be decreased when used in combination with Methionine.	0.960855	0	FALSE	FALSE
DB00134	Methionine	DB09286	Pipamperone	DDI type 26	The risk or severity of adverse effects can be increased when Methionine is combined with Pipamperone.	0.999957	0	FALSE	TRUE
DB00134	Methionine	DB09289	Tianeptine	DDI type 26	The risk or severity of adverse effects can be increased when Methionine is combined with Tianeptine.	0.999956	0	FALSE	TRUE
DB00134	Methionine	DB09292	Sacubitril	DDI type 26	The risk or severity of adverse effects can be increased when Methionine is combined with Sacubitril.	0.999959	0	FALSE	TRUE
DB00134	Methionine	DB09292	Sacubitril	DDI type 15	Methionine may decrease the excretion rate of Sacubitril which could result in a higher serum level.	0.955766	0	FALSE	FALSE
DB00134	Methionine	DB09300	Butylscopolamine	DDI type 54	Methionine may increase the central nervous system depressant (CNS depressant) activities of Butylscopolamine.	0.999043	1	FALSE	FALSE
DB00134	Methionine	DB09449	Sodium phosphate, monobasic	DDI type 26	The risk or severity of adverse effects can be increased when Methionine is combined with Sodium phosphate, monobasic.	0.998052	0	FALSE	TRUE
DB00134	Methionine	DB09512	Simethicone	DDI type 26	The risk or severity of adverse effects can be increased when Methionine is combined with Simethicone.	0.999953	0	FALSE	TRUE
DB00134	Methionine	DB11642	Pitolisant	DDI type 26	The risk or severity of adverse effects can be increased when Methionine is combined with Pitolisant.	0.999827	0	FALSE	TRUE
DB00134	Methionine	DB12016	Ponesimod	DDI type 26	The risk or severity of adverse effects can be increased when Methionine is combined with Ponesimod.	0.99998	0	FALSE	TRUE
DB00134	Methionine	DB12278	Propiverine	DDI type 26	The risk or severity of adverse effects can be increased when Methionine is combined with Propiverine.	0.999643	0	FALSE	TRUE
DB00134	Methionine	DB12278	Propiverine	DDI type 54	Methionine may increase the central nervous system depressant (CNS depressant) activities of Propiverine.	0.998694	0	FALSE	FALSE
DB00134	Methionine	DB12310	Trehalose	DDI type 13	The therapeutic efficacy of Trehalose can be decreased when used in combination with Methionine.	0.990774	0	FALSE	FALSE
DB00134	Methionine	DB12371	Siponimod	DDI type 26	The risk or severity of adverse effects can be increased when Methionine is combined with Siponimod.	0.99995	0	FALSE	TRUE
DB00134	Methionine	DB12582	Piperine	DDI type 26	The risk or severity of adverse effects can be increased when Methionine is combined with Piperine.	0.999878	0	FALSE	TRUE
DB00134	Methionine	DB12612	Ozanimod	DDI type 26	The risk or severity of adverse effects can be increased when Methionine is combined with Ozanimod.	0.999955	0	FALSE	TRUE
DB00134	Methionine	DB12661	Urapidil	DDI type 26	The risk or severity of adverse effects can be increased when Methionine is combined with Urapidil.	0.999986	0	FALSE	TRUE
DB00134	Methionine	DB12783	Benserazide	DDI type 26	The risk or severity of adverse effects can be increased when Methionine is combined with Benserazide.	0.999482	0	FALSE	TRUE
DB00134	Methionine	DB12783	Benserazide	DDI type 15	Methionine may decrease the excretion rate of Benserazide which could result in a higher serum level.	0.992678	0	FALSE	FALSE
DB00134	Methionine	DB12846	Reproterol	DDI type 16	Methionine may increase the excretion rate of Reproterol which could result in a lower serum level and potentially a reduction in efficacy.	0.979589	0	FALSE	FALSE
DB00134	Methionine	DB12930	Opipramol	DDI type 26	The risk or severity of adverse effects can be increased when Methionine is combined with Opipramol.	0.999986	0	FALSE	TRUE
DB00134	Methionine	DB13178	Inositol	DDI type 15	Methionine may decrease the excretion rate of Inositol which could result in a higher serum level.	0.975476	0	FALSE	FALSE
DB00134	Methionine	DB13324	Tetrazepam	DDI type 26	The risk or severity of adverse effects can be increased when Methionine is combined with Tetrazepam.	0.999821	0	FALSE	TRUE
DB00134	Methionine	DB13528	Chlormadinone	DDI type 7	The metabolism of Chlormadinone can be increased when combined with Methionine.	0.999192	0	FALSE	FALSE
DB00134	Methionine	DB13619	Bornaprine	DDI type 26	The risk or severity of adverse effects can be increased when Methionine is combined with Bornaprine.	0.999691	0	FALSE	TRUE
DB00134	Methionine	DB13619	Bornaprine	DDI type 54	Methionine may increase the central nervous system depressant (CNS depressant) activities of Bornaprine.	0.99995	0	FALSE	FALSE
DB00134	Methionine	DB13642	Pridinol	DDI type 26	The risk or severity of adverse effects can be increased when Methionine is combined with Pridinol.	0.99998	0	FALSE	TRUE
DB00134	Methionine	DB13787	Tilidine	DDI type 26	The risk or severity of adverse effects can be increased when Methionine is combined with Tilidine.	0.99996	0	FALSE	TRUE
DB00134	Methionine	DB13956	Estradiol valerate	DDI type 7	The metabolism of Estradiol valerate can be increased when combined with Methionine.	0.999456	0	FALSE	FALSE
DB00134	Methionine	DB14090	Dimethyl sulfone	DDI type 26	The risk or severity of adverse effects can be increased when Methionine is combined with Dimethyl sulfone.	0.977614	0	FALSE	TRUE
DB00134	Methionine	DB14219	Monomethyl fumarate	DDI type 26	The risk or severity of adverse effects can be increased when Methionine is combined with Monomethyl fumarate.	0.99755	0	FALSE	TRUE
DB00134	Methionine	DB14509	Lithium carbonate	DDI type 15	Methionine may decrease the excretion rate of Lithium carbonate which could result in a higher serum level.	0.95035	0	FALSE	FALSE
DB00134	Methionine	DB14513	Magnesium	DDI type 9	The serum concentration of Magnesium can be decreased when it is combined with Methionine.	0.992857	1	FALSE	FALSE
DB00134	Methionine	DB14634	Fluprednidene acetate	DDI type 26	The risk or severity of adverse effects can be increased when Methionine is combined with Fluprednidene acetate.	0.999793	0	FALSE	TRUE
DB00134	Methionine	DB14681	Cortisone	DDI type 26	The risk or severity of adverse effects can be increased when Methionine is combined with Cortisone.	0.988861	0	FALSE	TRUE
DB00134	Methionine	DB14783	Diroximel fumarate	DDI type 26	The risk or severity of adverse effects can be increased when Methionine is combined with Diroximel fumarate.	0.999941	0	FALSE	TRUE
DB00134	Methionine	DB14785	Fenebrutinib	DDI type 26	The risk or severity of adverse effects can be increased when Methionine is combined with Fenebrutinib.	0.999561	0	FALSE	TRUE
DB00134	Methionine	DB14936	Menaquinone 6	DDI type 26	The risk or severity of adverse effects can be increased when Methionine is combined with Menaquinone 6.	0.999314	0	FALSE	TRUE
DB00134	Methionine	DB15170	Evobrutinib	DDI type 26	The risk or severity of adverse effects can be increased when Methionine is combined with Evobrutinib.	0.999711	0	FALSE	TRUE
DB00134	Methionine	DB15578	Desfesoterodine	DDI type 26	The risk or severity of adverse effects can be increased when Methionine is combined with Desfesoterodine.	0.988246	0	FALSE	TRUE
DB00134	Methionine	DB15578	Desfesoterodine	DDI type 54	Methionine may increase the central nervous system depressant (CNS depressant) activities of Desfesoterodine.	0.988221	0	FALSE	FALSE
DB00134	Methionine	DB16272	Orelabrutinib	DDI type 26	The risk or severity of adverse effects can be increased when Methionine is combined with Orelabrutinib.	0.999932	0	FALSE	TRUE
DB00134	Methionine	DB16852	Remibrutinib	DDI type 26	The risk or severity of adverse effects can be increased when Methionine is combined with Remibrutinib.	0.994453	0	FALSE	TRUE
DB00134	Methionine	-	Tolebrutinib	DDI type 26	The risk or severity of adverse effects can be increased when Methionine is combined with Tolebrutinib.	0.998112	0	FALSE	TRUE
DB00137	Lutein	DB00115	Cyanocobalamin	DDI type 13	The therapeutic efficacy of Cyanocobalamin can be decreased when used in combination with Lutein.	0.984619	1	FALSE	FALSE
DB00137	Lutein	DB00122	Choline	DDI type 15	Lutein may decrease the excretion rate of Choline which could result in a higher serum level.	0.962471	0	FALSE	FALSE
DB00137	Lutein	DB00138	Cystine	DDI type 27	The risk or severity of bleeding can be increased when Lutein is combined with Cystine.	0.997264	0	FALSE	TRUE
DB00137	Lutein	DB00140	Riboflavin	DDI type 27	The risk or severity of bleeding can be increased when Lutein is combined with Riboflavin.	0.998843	0	FALSE	TRUE
DB00137	Lutein	DB00152	Thiamine	DDI type 27	The risk or severity of bleeding can be increased when Lutein is combined with Thiamine.	0.953527	1	FALSE	TRUE
DB00137	Lutein	DB00158	Folic acid	DDI type 27	The risk or severity of bleeding can be increased when Lutein is combined with Folic acid.	0.976829	0	FALSE	TRUE
DB00137	Lutein	DB00175	Pravastatin	DDI type 27	The risk or severity of bleeding can be increased when Lutein is combined with Pravastatin.	0.995262	0	FALSE	TRUE
DB00137	Lutein	DB00181	Baclofen	DDI type 26	The risk or severity of adverse effects can be increased when Lutein is combined with Baclofen.	0.952547	1	FALSE	TRUE
DB00137	Lutein	DB00190	Carbidopa	DDI type 27	The risk or severity of bleeding can be increased when Lutein is combined with Carbidopa.	0.999512	0	FALSE	TRUE
DB00137	Lutein	DB00242	Cladribine	DDI type 27	The risk or severity of bleeding can be increased when Lutein is combined with Cladribine.	0.999903	0	FALSE	TRUE
DB00137	Lutein	DB00243	Ranolazine	DDI type 27	The risk or severity of bleeding can be increased when Lutein is combined with Ranolazine.	0.994284	0	FALSE	TRUE
DB00137	Lutein	DB00244	Mesalazine	DDI type 27	The risk or severity of bleeding can be increased when Lutein is combined with Mesalazine.	0.990053	0	FALSE	TRUE
DB00137	Lutein	DB00285	Venlafaxine	DDI type 27	The risk or severity of bleeding can be increased when Lutein is combined with Venlafaxine.	0.98219	0	FALSE	TRUE		Phentermine (DB00191; P31645|P23975), Amitriptyline (DB00321; P31645|P23975), Sibutramine (DB01105; P31645|P23975), Doxepin (DB01142; P31645|P23975), Nefazodone (DB01149; P31645|P23975), Milnacipran (DB04896; P31645|P23975), Levomilnacipran (DB08918; P31645|P23975)
DB00137	Lutein	DB00295	Morphine	DDI type 27	The risk or severity of bleeding can be increased when Lutein is combined with Morphine.	0.949964	0	FALSE	TRUE
DB00137	Lutein	DB00331	Metformin	DDI type 13	The therapeutic efficacy of Metformin can be decreased when used in combination with Lutein.	0.987233	0	FALSE	FALSE
DB00137	Lutein	DB00373	Timolol	DDI type 27	The risk or severity of bleeding can be increased when Lutein is combined with Timolol.	0.999238	0	FALSE	TRUE
DB00137	Lutein	DB00381	Amlodipine	DDI type 27	The risk or severity of bleeding can be increased when Lutein is combined with Amlodipine.	0.984004	1	FALSE	TRUE
DB00137	Lutein	DB00399	Zoledronic acid	DDI type 26	The risk or severity of adverse effects can be increased when Lutein is combined with Zoledronic acid.	0.983789	0	FALSE	TRUE
DB00137	Lutein	DB00437	Allopurinol	DDI type 27	The risk or severity of bleeding can be increased when Lutein is combined with Allopurinol.	0.993727	0	FALSE	TRUE
DB00137	Lutein	DB00451	Levothyroxine	DDI type 27	The risk or severity of bleeding can be increased when Lutein is combined with Levothyroxine.	0.986185	0	FALSE	TRUE
DB00137	Lutein	DB00528	Lercanidipine	DDI type 27	The risk or severity of bleeding can be increased when Lutein is combined with Lercanidipine.	0.946691	0	FALSE	TRUE
DB00137	Lutein	DB00537	Ciprofloxacin	DDI type 27	The risk or severity of bleeding can be increased when Lutein is combined with Ciprofloxacin.	0.981099	0	FALSE	TRUE		Enoxacin (DB00467; P43702|P43700)
DB00137	Lutein	DB00563	Methotrexate	DDI type 27	The risk or severity of bleeding can be increased when Lutein is combined with Methotrexate.	0.999099	0	FALSE	TRUE
DB00137	Lutein	DB00564	Carbamazepine	DDI type 27	The risk or severity of bleeding can be increased when Lutein is combined with Carbamazepine.	0.999413	0	FALSE	TRUE
DB00137	Lutein	DB00568	Cinnarizine	DDI type 27	The risk or severity of bleeding can be increased when Lutein is combined with Cinnarizine.	0.975126	0	FALSE	TRUE
DB00137	Lutein	DB00581	Lactulose	DDI type 13	The therapeutic efficacy of Lactulose can be decreased when used in combination with Lutein.	0.991756	0	FALSE	FALSE
DB00137	Lutein	DB00584	Enalapril	DDI type 27	The risk or severity of bleeding can be increased when Lutein is combined with Enalapril.	0.984461	0	FALSE	TRUE		Zofenopril (DB13166; P12821)
DB00137	Lutein	DB00586	Diclofenac	DDI type 26	The risk or severity of adverse effects can be increased when Lutein is combined with Diclofenac.	0.996036	0	FALSE	TRUE		Suprofen (DB00870; P35354|P23219), Tiaprofenic acid (DB01600; P35354|P23219)
DB00137	Lutein	DB00588	Fluticasone propionate	DDI type 27	The risk or severity of bleeding can be increased when Lutein is combined with Fluticasone propionate.	0.98591	0	FALSE	TRUE		Flunisolide (DB00180; P04150), Diflorasone (DB00223; P04150), Alclometasone (DB00240; P04150), Beclomethasone dipropionate (DB00394; P04150), Betamethasone (DB00443; P04150), Desoximetasone (DB00547; P04150), Fluocinolone acetonide (DB00591; P04150), Flumethasone (DB00663; P04150), Hydrocortisone (DB00741; P04150), Clocortolone (DB00838; P04150), Flurandrenolide (DB00846; P04150), Prednisolone (D…
DB00137	Lutein	DB00590	Doxazosin	DDI type 27	The risk or severity of bleeding can be increased when Lutein is combined with Doxazosin.	0.996013	0	FALSE	TRUE		Silodosin (DB06207; P35348|P25100)
DB00137	Lutein	DB00630	Alendronic acid	DDI type 26	The risk or severity of adverse effects can be increased when Lutein is combined with Alendronic acid.	0.99725	0	FALSE	TRUE
DB00137	Lutein	DB00675	Tamoxifen	DDI type 27	The risk or severity of bleeding can be increased when Lutein is combined with Tamoxifen.	0.969051	0	FALSE	TRUE
DB00137	Lutein	DB00706	Tamsulosin	DDI type 27	The risk or severity of bleeding can be increased when Lutein is combined with Tamsulosin.	0.949788	0	FALSE	TRUE		Phentolamine (DB00692; P35348), Trifluoperazine (DB00831; P35348), Silodosin (DB06207; P35348)
DB00137	Lutein	DB00710	Ibandronate	DDI type 27	The risk or severity of bleeding can be increased when Lutein is combined with Ibandronate.	0.997088	0	FALSE	TRUE
DB00137	Lutein	DB00715	Paroxetine	DDI type 27	The risk or severity of bleeding can be increased when Lutein is combined with Paroxetine.	0.996207	0	FALSE	TRUE		Phentermine (DB00191; P31645), Amitriptyline (DB00321; P31645), Fluoxetine (DB00472; P31645), Sibutramine (DB01105; P31645), Doxepin (DB01142; P31645), Nefazodone (DB01149; P31645), Milnacipran (DB04896; P31645), Levomilnacipran (DB08918; P31645)
DB00137	Lutein	DB00722	Lisinopril	DDI type 27	The risk or severity of bleeding can be increased when Lutein is combined with Lisinopril.	0.986459	0	FALSE	TRUE		Zofenopril (DB13166; P12821)
DB00137	Lutein	DB00727	Nitroglycerin	DDI type 27	The risk or severity of bleeding can be increased when Lutein is combined with Nitroglycerin.	0.979431	0	FALSE	TRUE
DB00137	Lutein	DB00776	Oxcarbazepine	DDI type 27	The risk or severity of bleeding can be increased when Lutein is combined with Oxcarbazepine.	0.998071	0	FALSE	TRUE
DB00137	Lutein	DB00787	Acyclovir	DDI type 27	The risk or severity of bleeding can be increased when Lutein is combined with Acyclovir.	0.997649	0	FALSE	TRUE
DB00137	Lutein	DB00820	Tadalafil	DDI type 27	The risk or severity of bleeding can be increased when Lutein is combined with Tadalafil.	0.940624	0	FALSE	TRUE		Sildenafil (DB00203; O76074), Theophylline (DB00277; O76074), Vardenafil (DB00862; O76074), Udenafil (DB06267; O76074)
DB00137	Lutein	DB00869	Dorzolamide	DDI type 13	The therapeutic efficacy of Dorzolamide can be decreased when used in combination with Lutein.	0.987512	0	FALSE	FALSE
DB00137	Lutein	DB00876	Eprosartan	DDI type 27	The risk or severity of bleeding can be increased when Lutein is combined with Eprosartan.	0.954946	0	FALSE	TRUE
DB00137	Lutein	DB00884	Risedronic acid	DDI type 26	The risk or severity of adverse effects can be increased when Lutein is combined with Risedronic acid.	0.988789	0	FALSE	TRUE
DB00137	Lutein	DB00915	Amantadine	DDI type 27	The risk or severity of bleeding can be increased when Lutein is combined with Amantadine.	0.999874	1	FALSE	TRUE
DB00137	Lutein	DB00983	Formoterol	DDI type 27	The risk or severity of bleeding can be increased when Lutein is combined with Formoterol.	0.999619	0	FALSE	TRUE		Racepinephrine (DB11124; P07550)
DB00137	Lutein	DB00993	Azathioprine	DDI type 27	The risk or severity of bleeding can be increased when Lutein is combined with Azathioprine.	0.999582	0	FALSE	TRUE
DB00137	Lutein	DB00999	Hydrochlorothiazide	DDI type 13	The therapeutic efficacy of Hydrochlorothiazide can be decreased when used in combination with Lutein.	0.986684	0	FALSE	FALSE
DB00137	Lutein	DB01001	Salbutamol	DDI type 27	The risk or severity of bleeding can be increased when Lutein is combined with Salbutamol.	0.984169	0	FALSE	TRUE		Racepinephrine (DB11124; P07550)
DB00137	Lutein	DB01019	Bethanechol	DDI type 26	The risk or severity of adverse effects can be increased when Lutein is combined with Bethanechol.	0.987812	0	FALSE	TRUE
DB00137	Lutein	DB01039	Fenofibrate	DDI type 7	The metabolism of Fenofibrate can be increased when combined with Lutein.	0.981416	0	FALSE	FALSE
DB00137	Lutein	DB01062	Oxybutynin	DDI type 27	The risk or severity of bleeding can be increased when Lutein is combined with Oxybutynin.	0.953653	0	FALSE	TRUE
DB00137	Lutein	DB01104	Sertraline	DDI type 27	The risk or severity of bleeding can be increased when Lutein is combined with Sertraline.	0.958266	0	FALSE	TRUE
DB00137	Lutein	DB01136	Carvedilol	DDI type 27	The risk or severity of bleeding can be increased when Lutein is combined with Carvedilol.	0.996936	0	FALSE	TRUE
DB00137	Lutein	DB01137	Levofloxacin	DDI type 27	The risk or severity of bleeding can be increased when Lutein is combined with Levofloxacin.	0.997404	0	FALSE	TRUE		Enoxacin (DB00467; P43700|P43702)
DB00137	Lutein	DB01162	Terazosin	DDI type 27	The risk or severity of bleeding can be increased when Lutein is combined with Terazosin.	0.99499	0	FALSE	TRUE
DB00137	Lutein	DB01183	Naloxone	DDI type 27	The risk or severity of bleeding can be increased when Lutein is combined with Naloxone.	0.947773	0	FALSE	TRUE
DB00137	Lutein	DB01194	Brinzolamide	DDI type 13	The therapeutic efficacy of Brinzolamide can be decreased when used in combination with Lutein.	0.992452	0	FALSE	FALSE
DB00137	Lutein	DB01197	Captopril	DDI type 26	The risk or severity of adverse effects can be increased when Lutein is combined with Captopril.	0.945585	0	FALSE	TRUE		Zofenopril (DB13166; P12821)
DB00137	Lutein	DB01204	Mitoxantrone	DDI type 27	The risk or severity of bleeding can be increased when Lutein is combined with Mitoxantrone.	0.999889	0	FALSE	TRUE
DB00137	Lutein	DB01233	Metoclopramide	DDI type 27	The risk or severity of bleeding can be increased when Lutein is combined with Metoclopramide.	0.944279	0	FALSE	TRUE
DB00137	Lutein	DB01288	Fenoterol	DDI type 27	The risk or severity of bleeding can be increased when Lutein is combined with Fenoterol.	0.984161	0	FALSE	TRUE		Racepinephrine (DB11124; P07550)
DB00137	Lutein	DB01373	Calcium	DDI type 13	The therapeutic efficacy of Calcium can be decreased when used in combination with Lutein.	0.95198	2	FALSE	FALSE
DB00137	Lutein	DB01390	Sodium bicarbonate	DDI type 13	The therapeutic efficacy of Sodium bicarbonate can be decreased when used in combination with Lutein.	0.985424	0	FALSE	FALSE
DB00137	Lutein	DB01409	Tiotropium	DDI type 27	The risk or severity of bleeding can be increased when Lutein is combined with Tiotropium.	0.986643	0	FALSE	TRUE
DB00137	Lutein	DB01422	Nitroxoline	DDI type 15	Lutein may decrease the excretion rate of Nitroxoline which could result in a higher serum level.	0.977338	0	FALSE	FALSE
DB00137	Lutein	DB01592	Iron	DDI type 13	The therapeutic efficacy of Iron can be decreased when used in combination with Lutein.	0.947479	0	FALSE	FALSE
DB00137	Lutein	DB01593	Zinc	DDI type 13	The therapeutic efficacy of Zinc can be decreased when used in combination with Lutein.	0.947479	0	FALSE	FALSE
DB00137	Lutein	DB01611	Hydroxychloroquine	DDI type 26	The risk or severity of adverse effects can be increased when Lutein is combined with Hydroxychloroquine.	0.981535	0	FALSE	TRUE
DB00137	Lutein	DB01783	Pantothenic acid	DDI type 27	The risk or severity of bleeding can be increased when Lutein is combined with Pantothenic acid.	0.991275	0	FALSE	TRUE
DB00137	Lutein	DB03766	Propanoic acid	DDI type 13	The therapeutic efficacy of Propanoic acid can be decreased when used in combination with Lutein.	0.98354	0	FALSE	FALSE
DB00137	Lutein	DB04216	Quercetin	DDI type 27	The risk or severity of bleeding can be increased when Lutein is combined with Quercetin.	0.971226	0	FALSE	TRUE
DB00137	Lutein	DB04398	Lactic acid	DDI type 13	The therapeutic efficacy of Lactic acid can be decreased when used in combination with Lutein.	0.995449	0	FALSE	FALSE
DB00137	Lutein	DB06228	Rivaroxaban	DDI type 27	The risk or severity of bleeding can be increased when Lutein is combined with Rivaroxaban.	0.96879	0	FALSE	TRUE		Bemiparin (DB09258; P00742), Protein S human (DB13149; P00742)
DB00137	Lutein	DB06228	Rivaroxaban	DDI type 46	Lutein may increase the anticoagulant activities of Rivaroxaban.	0.993885	0	FALSE	FALSE
DB00137	Lutein	DB06755	Beta carotene	DDI type 27	The risk or severity of bleeding can be increased when Lutein is combined with Beta carotene.	0.979818	0	FALSE	TRUE		Tocopherol (DB11251; Free radicals), alpha-Tocopherol acetate (DB14003; Free radicals)
DB00137	Lutein	DB08816	Ticagrelor	DDI type 27	The risk or severity of bleeding can be increased when Lutein is combined with Ticagrelor.	0.997726	0	FALSE	TRUE
DB00137	Lutein	DB08868	Fingolimod	DDI type 69	Lutein may increase the immunosuppressive activities of Fingolimod.	0.991099	0	FALSE	FALSE
DB00137	Lutein	DB08893	Mirabegron	DDI type 27	The risk or severity of bleeding can be increased when Lutein is combined with Mirabegron.	0.996873	0	FALSE	TRUE		Racepinephrine (DB11124; P13945)
DB00137	Lutein	DB08906	Fluticasone furoate	DDI type 27	The risk or severity of bleeding can be increased when Lutein is combined with Fluticasone furoate.	0.966708	0	FALSE	TRUE		Flunisolide (DB00180; P04150), Diflorasone (DB00223; P04150), Alclometasone (DB00240; P04150), Beclomethasone dipropionate (DB00394; P04150), Betamethasone (DB00443; P04150), Desoximetasone (DB00547; P04150), Fluocinolone acetonide (DB00591; P04150), Flumethasone (DB00663; P04150), Hydrocortisone (DB00741; P04150), Clocortolone (DB00838; P04150), Flurandrenolide (DB00846; P04150), Prednisolone (D…
DB00137	Lutein	DB08908	Dimethyl fumarate	DDI type 26	The risk or severity of adverse effects can be increased when Lutein is combined with Dimethyl fumarate.	0.999237	0	FALSE	TRUE
DB00137	Lutein	DB09020	Bisacodyl	DDI type 13	The therapeutic efficacy of Bisacodyl can be decreased when used in combination with Lutein.	0.992705	0	FALSE	FALSE
DB00137	Lutein	DB09026	Aliskiren	DDI type 27	The risk or severity of bleeding can be increased when Lutein is combined with Aliskiren.	0.985605	0	FALSE	TRUE
DB00137	Lutein	DB09082	Vilanterol	DDI type 27	The risk or severity of bleeding can be increased when Lutein is combined with Vilanterol.	0.994122	0	FALSE	TRUE		Racepinephrine (DB11124; P07550)
DB00137	Lutein	DB09083	Ivabradine	DDI type 27	The risk or severity of bleeding can be increased when Lutein is combined with Ivabradine.	0.976694	0	FALSE	TRUE
DB00137	Lutein	DB09242	Moxonidine	DDI type 27	The risk or severity of bleeding can be increased when Lutein is combined with Moxonidine.	0.988397	0	FALSE	TRUE
DB00137	Lutein	DB09268	Picosulfuric acid	DDI type 13	The therapeutic efficacy of Picosulfuric acid can be decreased when used in combination with Lutein.	0.991425	0	FALSE	FALSE
DB00137	Lutein	DB09292	Sacubitril	DDI type 27	The risk or severity of bleeding can be increased when Lutein is combined with Sacubitril.	0.963565	0	FALSE	TRUE
DB00137	Lutein	DB09449	Sodium phosphate, monobasic	DDI type 13	The therapeutic efficacy of Sodium phosphate, monobasic can be decreased when used in combination with Lutein.	0.975144	0	FALSE	FALSE
DB00137	Lutein	DB09512	Simethicone	DDI type 27	The risk or severity of bleeding can be increased when Lutein is combined with Simethicone.	0.990421	0	FALSE	TRUE
DB00137	Lutein	DB11135	Selenium	DDI type 13	The therapeutic efficacy of Selenium can be decreased when used in combination with Lutein.	0.947479	0	FALSE	FALSE
DB00137	Lutein	DB11136	Chromium	DDI type 13	The therapeutic efficacy of Chromium can be decreased when used in combination with Lutein.	0.947479	0	FALSE	FALSE
DB00137	Lutein	DB11642	Pitolisant	DDI type 27	The risk or severity of bleeding can be increased when Lutein is combined with Pitolisant.	0.961711	0	FALSE	TRUE
DB00137	Lutein	DB12310	Trehalose	DDI type 13	The therapeutic efficacy of Trehalose can be decreased when used in combination with Lutein.	0.970359	0	FALSE	FALSE
DB00137	Lutein	DB12371	Siponimod	DDI type 27	The risk or severity of bleeding can be increased when Lutein is combined with Siponimod.	0.997027	0	FALSE	TRUE
DB00137	Lutein	DB12582	Piperine	DDI type 27	The risk or severity of bleeding can be increased when Lutein is combined with Piperine.	0.994318	0	FALSE	TRUE
DB00137	Lutein	DB12612	Ozanimod	DDI type 27	The risk or severity of bleeding can be increased when Lutein is combined with Ozanimod.	0.987384	0	FALSE	TRUE
DB00137	Lutein	DB12661	Urapidil	DDI type 27	The risk or severity of bleeding can be increased when Lutein is combined with Urapidil.	0.943313	0	FALSE	TRUE
DB00137	Lutein	DB12783	Benserazide	DDI type 27	The risk or severity of bleeding can be increased when Lutein is combined with Benserazide.	0.964236	1	FALSE	TRUE
DB00137	Lutein	DB12846	Reproterol	DDI type 27	The risk or severity of bleeding can be increased when Lutein is combined with Reproterol.	0.968529	0	FALSE	TRUE
DB00137	Lutein	DB12930	Opipramol	DDI type 27	The risk or severity of bleeding can be increased when Lutein is combined with Opipramol.	0.959473	0	FALSE	TRUE
DB00137	Lutein	DB13783	Acemetacin	DDI type 27	The risk or severity of bleeding can be increased when Lutein is combined with Acemetacin.	0.9689	0	FALSE	TRUE
DB00137	Lutein	DB14785	Fenebrutinib	DDI type 27	The risk or severity of bleeding can be increased when Lutein is combined with Fenebrutinib.	0.991102	0	FALSE	TRUE
DB00137	Lutein	DB14936	Menaquinone 6	DDI type 27	The risk or severity of bleeding can be increased when Lutein is combined with Menaquinone 6.	0.98629	1	FALSE	TRUE
DB00137	Lutein	DB15170	Evobrutinib	DDI type 27	The risk or severity of bleeding can be increased when Lutein is combined with Evobrutinib.	0.99913	0	FALSE	TRUE
DB00137	Lutein	DB15578	Desfesoterodine	DDI type 27	The risk or severity of bleeding can be increased when Lutein is combined with Desfesoterodine.	0.968741	0	FALSE	TRUE
DB00137	Lutein	DB16272	Orelabrutinib	DDI type 27	The risk or severity of bleeding can be increased when Lutein is combined with Orelabrutinib.	0.999366	0	FALSE	TRUE
DB00137	Lutein	-	Tolebrutinib	DDI type 27	The risk or severity of bleeding can be increased when Lutein is combined with Tolebrutinib.	0.999699	0	FALSE	TRUE
DB00138	Cystine	DB00115	Cyanocobalamin	DDI type 15	Cystine may decrease the excretion rate of Cyanocobalamin which could result in a higher serum level.	0.966161	0	FALSE	FALSE
DB00138	Cystine	DB00134	Methionine	DDI type 26	The risk or severity of adverse effects can be increased when Cystine is combined with Methionine.	0.944392	0	FALSE	TRUE
DB00138	Cystine	DB00169	Cholecalciferol	DDI type 9	The serum concentration of Cholecalciferol can be decreased when it is combined with Cystine.	0.993585	0	FALSE	FALSE
DB00138	Cystine	DB00190	Carbidopa	DDI type 1	Cystine can cause a decrease in the absorption of Carbidopa resulting in a reduced serum concentration and potentially a decrease in efficacy.	0.996954	0	FALSE	FALSE
DB00138	Cystine	DB00196	Fluconazole	DDI type 1	Cystine can cause a decrease in the absorption of Fluconazole resulting in a reduced serum concentration and potentially a decrease in efficacy.	0.942195	0	FALSE	FALSE
DB00138	Cystine	DB00209	Trospium	DDI type 54	Cystine may increase the central nervous system depressant (CNS depressant) activities of Trospium.	0.998729	1	FALSE	FALSE
DB00138	Cystine	DB00254	Doxycycline	DDI type 1	Cystine can cause a decrease in the absorption of Doxycycline resulting in a reduced serum concentration and potentially a decrease in efficacy.	0.993205	0	FALSE	FALSE
DB00138	Cystine	DB00287	Travoprost	DDI type 9	The serum concentration of Travoprost can be decreased when it is combined with Cystine.	0.997123	0	FALSE	FALSE
DB00138	Cystine	DB00332	Ipratropium	DDI type 9	The serum concentration of Ipratropium can be decreased when it is combined with Cystine.	0.998222	0	FALSE	FALSE
DB00138	Cystine	DB00363	Clozapine	DDI type 54	Cystine may increase the central nervous system depressant (CNS depressant) activities of Clozapine.	0.966335	0	FALSE	FALSE
DB00138	Cystine	DB00425	Zolpidem	DDI type 54	Cystine may increase the central nervous system depressant (CNS depressant) activities of Zolpidem.	0.982567	0	FALSE	FALSE
DB00138	Cystine	DB00468	Quinine	DDI type 9	The serum concentration of Quinine can be decreased when it is combined with Cystine.	0.989564	0	FALSE	FALSE
DB00138	Cystine	DB00496	Darifenacin	DDI type 7	The metabolism of Darifenacin can be increased when combined with Cystine.	0.97381	0	FALSE	FALSE
DB00138	Cystine	DB00496	Darifenacin	DDI type 54	Cystine may increase the central nervous system depressant (CNS depressant) activities of Darifenacin.	0.962507	0	FALSE	FALSE
DB00138	Cystine	DB00537	Ciprofloxacin	DDI type 1	Cystine can cause a decrease in the absorption of Ciprofloxacin resulting in a reduced serum concentration and potentially a decrease in efficacy.	0.999422	0	FALSE	FALSE
DB00138	Cystine	DB00581	Lactulose	DDI type 13	The therapeutic efficacy of Lactulose can be decreased when used in combination with Cystine.	0.99653	0	FALSE	FALSE
DB00138	Cystine	DB00588	Fluticasone propionate	DDI type 26	The risk or severity of adverse effects can be increased when Cystine is combined with Fluticasone propionate.	0.979425	0	FALSE	TRUE		Hydrocortamate (DB00769; P04150)
DB00138	Cystine	DB00630	Alendronic acid	DDI type 1	Cystine can cause a decrease in the absorption of Alendronic acid resulting in a reduced serum concentration and potentially a decrease in efficacy.	0.995532	0	FALSE	FALSE
DB00138	Cystine	DB00654	Latanoprost	DDI type 9	The serum concentration of Latanoprost can be decreased when it is combined with Cystine.	0.951743	0	FALSE	FALSE
DB00138	Cystine	DB00675	Tamoxifen	DDI type 7	The metabolism of Tamoxifen can be increased when combined with Cystine.	0.99689	0	FALSE	FALSE
DB00138	Cystine	DB00687	Fludrocortisone	DDI type 26	The risk or severity of adverse effects can be increased when Cystine is combined with Fludrocortisone.	0.992104	0	FALSE	TRUE
DB00138	Cystine	DB00710	Ibandronate	DDI type 1	Cystine can cause a decrease in the absorption of Ibandronate resulting in a reduced serum concentration and potentially a decrease in efficacy.	0.995897	0	FALSE	FALSE
DB00138	Cystine	DB00741	Hydrocortisone	DDI type 26	The risk or severity of adverse effects can be increased when Cystine is combined with Hydrocortisone.	0.991335	0	FALSE	TRUE
DB00138	Cystine	DB00794	Primidone	DDI type 9	The serum concentration of Primidone can be decreased when it is combined with Cystine.	0.988256	0	FALSE	FALSE
DB00138	Cystine	DB00884	Risedronic acid	DDI type 1	Cystine can cause a decrease in the absorption of Risedronic acid resulting in a reduced serum concentration and potentially a decrease in efficacy.	0.946349	0	FALSE	FALSE
DB00138	Cystine	DB00905	Bimatoprost	DDI type 9	The serum concentration of Bimatoprost can be decreased when it is combined with Cystine.	0.997782	0	FALSE	FALSE
DB00138	Cystine	DB00925	Phenoxybenzamine	DDI type 26	The risk or severity of adverse effects can be increased when Cystine is combined with Phenoxybenzamine.	0.963476	0	FALSE	TRUE
DB00138	Cystine	DB00966	Telmisartan	DDI type 9	The serum concentration of Telmisartan can be decreased when it is combined with Cystine.	0.947514	0	FALSE	FALSE
DB00138	Cystine	DB00983	Formoterol	DDI type 15	Cystine may decrease the excretion rate of Formoterol which could result in a higher serum level.	0.948684	0	FALSE	FALSE
DB00138	Cystine	DB01001	Salbutamol	DDI type 15	Cystine may decrease the excretion rate of Salbutamol which could result in a higher serum level.	0.999305	0	FALSE	FALSE
DB00138	Cystine	DB01019	Bethanechol	DDI type 26	The risk or severity of adverse effects can be increased when Cystine is combined with Bethanechol.	0.988802	0	FALSE	TRUE
DB00138	Cystine	DB01039	Fenofibrate	DDI type 15	Cystine may decrease the excretion rate of Fenofibrate which could result in a higher serum level.	0.979682	0	FALSE	FALSE
DB00138	Cystine	DB01043	Memantine	DDI type 15	Cystine may decrease the excretion rate of Memantine which could result in a higher serum level.	0.995422	0	FALSE	FALSE
DB00138	Cystine	DB01075	Diphenhydramine	DDI type 26	The risk or severity of adverse effects can be increased when Cystine is combined with Diphenhydramine.	0.988141	0	FALSE	TRUE		Buclizine (DB00354; P35367), Chlorpromazine (DB00477; P35367), Cinnarizine (DB00568; P35367), Azatadine (DB00719; P35367), Propiomazine (DB00777; P35367), Methdilazine (DB00902; P35367), Azelastine (DB00972; P35367), Promethazine (DB01069; P35367), Doxepin (DB01142; P35367), Chlorprothixene (DB01239; P35367), Phenindamine (DB01619; P35367), Antazoline (DB08799; P35367), Butriptyline (DB09016; P35…
DB00138	Cystine	DB01097	Leflunomide	DDI type 26	The risk or severity of adverse effects can be increased when Cystine is combined with Leflunomide.	0.998171	0	FALSE	TRUE
DB00138	Cystine	DB01110	Miconazole	DDI type 1	Cystine can cause a decrease in the absorption of Miconazole resulting in a reduced serum concentration and potentially a decrease in efficacy.	0.998672	0	FALSE	FALSE
DB00138	Cystine	DB01112	Cefuroxime	DDI type 1	Cystine can cause a decrease in the absorption of Cefuroxime resulting in a reduced serum concentration and potentially a decrease in efficacy.	0.98565	0	FALSE	FALSE
DB00138	Cystine	DB01114	Chlorpheniramine	DDI type 26	The risk or severity of adverse effects can be increased when Cystine is combined with Chlorpheniramine.	0.942786	0	FALSE	TRUE		Buclizine (DB00354; P35367), Chlorpromazine (DB00477; P35367), Cinnarizine (DB00568; P35367), Azatadine (DB00719; P35367), Propiomazine (DB00777; P35367), Methdilazine (DB00902; P35367), Azelastine (DB00972; P35367), Promethazine (DB01069; P35367), Doxepin (DB01142; P35367), Chlorprothixene (DB01239; P35367), Phenindamine (DB01619; P35367), Antazoline (DB08799; P35367), Butriptyline (DB09016; P35…
DB00138	Cystine	DB01128	Bicalutamide	DDI type 9	The serum concentration of Bicalutamide can be decreased when it is combined with Cystine.	0.983783	0	FALSE	FALSE
DB00138	Cystine	DB01137	Levofloxacin	DDI type 1	Cystine can cause a decrease in the absorption of Levofloxacin resulting in a reduced serum concentration and potentially a decrease in efficacy.	0.99806	0	FALSE	FALSE
DB00138	Cystine	DB01183	Naloxone	DDI type 15	Cystine may decrease the excretion rate of Naloxone which could result in a higher serum level.	0.998605	0	FALSE	FALSE
DB00138	Cystine	DB01202	Levetiracetam	DDI type 26	The risk or severity of adverse effects can be increased when Cystine is combined with Levetiracetam.	0.975032	0	FALSE	TRUE
DB00138	Cystine	DB01390	Sodium bicarbonate	DDI type 15	Cystine may decrease the excretion rate of Sodium bicarbonate which could result in a higher serum level.	0.999904	0	FALSE	FALSE
DB00138	Cystine	DB01436	Alfacalcidol	DDI type 9	The serum concentration of Alfacalcidol can be decreased when it is combined with Cystine.	0.993605	0	FALSE	FALSE
DB00138	Cystine	DB01586	Ursodeoxycholic acid	DDI type 1	Cystine can cause a decrease in the absorption of Ursodeoxycholic acid resulting in a reduced serum concentration and potentially a decrease in efficacy.	0.998557	0	FALSE	FALSE
DB00138	Cystine	DB01591	Solifenacin	DDI type 9	The serum concentration of Solifenacin can be decreased when it is combined with Cystine.	0.990088	0	FALSE	FALSE
DB00138	Cystine	DB01591	Solifenacin	DDI type 54	Cystine may increase the central nervous system depressant (CNS depressant) activities of Solifenacin.	0.993427	0	FALSE	FALSE
DB00138	Cystine	DB01611	Hydroxychloroquine	DDI type 9	The serum concentration of Hydroxychloroquine can be decreased when it is combined with Cystine.	0.986377	0	FALSE	FALSE
DB00138	Cystine	DB01698	Rutin	DDI type 26	The risk or severity of adverse effects can be increased when Cystine is combined with Rutin.	0.999053	0	FALSE	TRUE
DB00138	Cystine	DB02300	Calcipotriol	DDI type 9	The serum concentration of Calcipotriol can be decreased when it is combined with Cystine.	0.996245	0	FALSE	FALSE
DB00138	Cystine	DB02714	3'-Uridinemonophosphate	DDI type 26	The risk or severity of adverse effects can be increased when Cystine is combined with 3'-Uridinemonophosphate.	0.997788	0	FALSE	TRUE
DB00138	Cystine	DB04703	Hesperidin	DDI type 26	The risk or severity of adverse effects can be increased when Cystine is combined with Hesperidin.	0.997255	0	FALSE	TRUE
DB00138	Cystine	DB05271	Rotigotine	DDI type 78	Cystine may increase the sedative activities of Rotigotine.	0.984057	0	FALSE	FALSE
DB00138	Cystine	DB06148	Mianserin	DDI type 9	The serum concentration of Mianserin can be decreased when it is combined with Cystine.	0.945831	0	FALSE	FALSE
DB00138	Cystine	DB06335	Saxagliptin	DDI type 15	Cystine may decrease the excretion rate of Saxagliptin which could result in a higher serum level.	0.960991	0	FALSE	FALSE
DB00138	Cystine	DB06623	Flupirtine	DDI type 15	Cystine may decrease the excretion rate of Flupirtine which could result in a higher serum level.	0.990561	0	FALSE	FALSE
DB00138	Cystine	DB06698	Betahistine	DDI type 26	The risk or severity of adverse effects can be increased when Cystine is combined with Betahistine.	0.999411	0	FALSE	TRUE
DB00138	Cystine	DB08868	Fingolimod	DDI type 69	Cystine may increase the immunosuppressive activities of Fingolimod.	0.98931	0	FALSE	FALSE
DB00138	Cystine	DB08880	Teriflunomide	DDI type 26	The risk or severity of adverse effects can be increased when Cystine is combined with Teriflunomide.	0.98844	0	FALSE	TRUE
DB00138	Cystine	DB08906	Fluticasone furoate	DDI type 26	The risk or severity of adverse effects can be increased when Cystine is combined with Fluticasone furoate.	0.999897	0	FALSE	TRUE		Hydrocortamate (DB00769; P04150)
DB00138	Cystine	DB08908	Dimethyl fumarate	DDI type 26	The risk or severity of adverse effects can be increased when Cystine is combined with Dimethyl fumarate.	0.999871	0	FALSE	TRUE
DB00138	Cystine	DB09020	Bisacodyl	DDI type 13	The therapeutic efficacy of Bisacodyl can be decreased when used in combination with Cystine.	0.96877	0	FALSE	FALSE
DB00138	Cystine	DB09153	Sodium chloride	DDI type 15	Cystine may decrease the excretion rate of Sodium chloride which could result in a higher serum level.	0.999929	0	FALSE	FALSE
DB00138	Cystine	DB09286	Pipamperone	DDI type 26	The risk or severity of adverse effects can be increased when Cystine is combined with Pipamperone.	0.999675	0	FALSE	TRUE
DB00138	Cystine	DB09292	Sacubitril	DDI type 15	Cystine may decrease the excretion rate of Sacubitril which could result in a higher serum level.	0.955388	0	FALSE	FALSE
DB00138	Cystine	DB09512	Simethicone	DDI type 1	Cystine can cause a decrease in the absorption of Simethicone resulting in a reduced serum concentration and potentially a decrease in efficacy.	0.997099	0	FALSE	FALSE
DB00138	Cystine	DB12016	Ponesimod	DDI type 9	The serum concentration of Ponesimod can be decreased when it is combined with Cystine.	0.968958	0	FALSE	FALSE
DB00138	Cystine	DB12310	Trehalose	DDI type 13	The therapeutic efficacy of Trehalose can be decreased when used in combination with Cystine.	0.997129	0	FALSE	FALSE
DB00138	Cystine	DB12582	Piperine	DDI type 26	The risk or severity of adverse effects can be increased when Cystine is combined with Piperine.	0.962146	0	FALSE	TRUE
DB00138	Cystine	DB12783	Benserazide	DDI type 15	Cystine may decrease the excretion rate of Benserazide which could result in a higher serum level.	0.962707	0	FALSE	FALSE
DB00138	Cystine	DB12846	Reproterol	DDI type 16	Cystine may increase the excretion rate of Reproterol which could result in a lower serum level and potentially a reduction in efficacy.	0.952087	0	FALSE	FALSE
DB00138	Cystine	DB12930	Opipramol	DDI type 26	The risk or severity of adverse effects can be increased when Cystine is combined with Opipramol.	0.989376	0	FALSE	TRUE
DB00138	Cystine	DB12930	Opipramol	DDI type 15	Cystine may decrease the excretion rate of Opipramol which could result in a higher serum level.	0.956288	0	FALSE	FALSE
DB00138	Cystine	DB13322	Hydrotalcite	DDI type 1	Cystine can cause a decrease in the absorption of Hydrotalcite resulting in a reduced serum concentration and potentially a decrease in efficacy.	0.970341	0	FALSE	FALSE
DB00138	Cystine	DB13619	Bornaprine	DDI type 54	Cystine may increase the central nervous system depressant (CNS depressant) activities of Bornaprine.	0.9982	0	FALSE	FALSE
DB00138	Cystine	DB13642	Pridinol	DDI type 26	The risk or severity of adverse effects can be increased when Cystine is combined with Pridinol.	0.943324	0	FALSE	TRUE
DB00138	Cystine	DB13919	Candesartan	DDI type 9	The serum concentration of Candesartan can be decreased when it is combined with Cystine.	0.989154	0	FALSE	FALSE
DB00138	Cystine	DB14219	Monomethyl fumarate	DDI type 15	Cystine may decrease the excretion rate of Monomethyl fumarate which could result in a higher serum level.	0.981882	0	FALSE	FALSE
DB00138	Cystine	DB14509	Lithium carbonate	DDI type 15	Cystine may decrease the excretion rate of Lithium carbonate which could result in a higher serum level.	0.988423	0	FALSE	FALSE
DB00138	Cystine	DB14513	Magnesium	DDI type 9	The serum concentration of Magnesium can be decreased when it is combined with Cystine.	0.989804	0	FALSE	FALSE
DB00138	Cystine	DB14634	Fluprednidene acetate	DDI type 26	The risk or severity of adverse effects can be increased when Cystine is combined with Fluprednidene acetate.	0.998258	0	FALSE	TRUE
DB00138	Cystine	DB14783	Diroximel fumarate	DDI type 26	The risk or severity of adverse effects can be increased when Cystine is combined with Diroximel fumarate.	0.999884	0	FALSE	TRUE
DB00138	Cystine	DB14785	Fenebrutinib	DDI type 9	The serum concentration of Fenebrutinib can be decreased when it is combined with Cystine.	0.996424	0	FALSE	FALSE
DB00138	Cystine	DB15170	Evobrutinib	DDI type 9	The serum concentration of Evobrutinib can be decreased when it is combined with Cystine.	0.970433	0	FALSE	FALSE
DB00138	Cystine	DB16852	Remibrutinib	DDI type 9	The serum concentration of Remibrutinib can be decreased when it is combined with Cystine.	0.989769	0	FALSE	FALSE
DB00140	Riboflavin	DB00115	Cyanocobalamin	DDI type 15	Riboflavin may decrease the excretion rate of Cyanocobalamin which could result in a higher serum level.	0.996046	3	FALSE	FALSE
DB00140	Riboflavin	DB00121	Biotin	DDI type 15	Riboflavin may decrease the excretion rate of Biotin which could result in a higher serum level.	0.999233	3	FALSE	FALSE
DB00140	Riboflavin	DB00122	Choline	DDI type 15	Riboflavin may decrease the excretion rate of Choline which could result in a higher serum level.	0.988718	0	FALSE	FALSE
DB00140	Riboflavin	DB00138	Cystine	DDI type 15	Riboflavin may decrease the excretion rate of Cystine which could result in a higher serum level.	0.996534	0	FALSE	FALSE
DB00140	Riboflavin	DB00152	Thiamine	DDI type 15	Riboflavin may decrease the excretion rate of Thiamine which could result in a higher serum level.	0.998886	3	FALSE	FALSE
DB00140	Riboflavin	DB00175	Pravastatin	DDI type 15	Riboflavin may decrease the excretion rate of Pravastatin which could result in a higher serum level.	0.985343	0	FALSE	FALSE
DB00140	Riboflavin	DB00186	Lorazepam	DDI type 13	The therapeutic efficacy of Lorazepam can be decreased when used in combination with Riboflavin.	0.994535	0	FALSE	FALSE
DB00140	Riboflavin	DB00186	Lorazepam	DDI type 15	Riboflavin may decrease the excretion rate of Lorazepam which could result in a higher serum level.	0.999287	0	FALSE	FALSE
DB00140	Riboflavin	DB00190	Carbidopa	DDI type 15	Riboflavin may decrease the excretion rate of Carbidopa which could result in a higher serum level.	0.994968	0	FALSE	FALSE
DB00140	Riboflavin	DB00193	Tramadol	DDI type 15	Riboflavin may decrease the excretion rate of Tramadol which could result in a higher serum level.	0.998657	0	FALSE	FALSE
DB00140	Riboflavin	DB00196	Fluconazole	DDI type 15	Riboflavin may decrease the excretion rate of Fluconazole which could result in a higher serum level.	0.998823	0	FALSE	FALSE
DB00140	Riboflavin	DB00213	Pantoprazole	DDI type 15	Riboflavin may decrease the excretion rate of Pantoprazole which could result in a higher serum level.	0.995277	2	FALSE	FALSE
DB00140	Riboflavin	DB00222	Glimepiride	DDI type 14	The therapeutic efficacy of Glimepiride can be increased when used in combination with Riboflavin.	0.955185	0	FALSE	FALSE
DB00140	Riboflavin	DB00222	Glimepiride	DDI type 15	Riboflavin may decrease the excretion rate of Glimepiride which could result in a higher serum level.	0.999687	0	FALSE	FALSE
DB00140	Riboflavin	DB00227	Lovastatin	DDI type 15	Riboflavin may decrease the excretion rate of Lovastatin which could result in a higher serum level.	0.995421	0	FALSE	FALSE
DB00140	Riboflavin	DB00242	Cladribine	DDI type 13	The therapeutic efficacy of Cladribine can be decreased when used in combination with Riboflavin.	0.979026	0	FALSE	FALSE
DB00140	Riboflavin	DB00254	Doxycycline	DDI type 1	Riboflavin can cause a decrease in the absorption of Doxycycline resulting in a reduced serum concentration and potentially a decrease in efficacy.	0.951836	0	FALSE	FALSE
DB00140	Riboflavin	DB00273	Topiramate	DDI type 13	The therapeutic efficacy of Topiramate can be decreased when used in combination with Riboflavin.	0.948872	0	FALSE	FALSE
DB00140	Riboflavin	DB00281	Lidocaine	DDI type 15	Riboflavin may decrease the excretion rate of Lidocaine which could result in a higher serum level.	0.994786	0	FALSE	FALSE
DB00140	Riboflavin	DB00285	Venlafaxine	DDI type 15	Riboflavin may decrease the excretion rate of Venlafaxine which could result in a higher serum level.	0.958491	0	FALSE	FALSE
DB00140	Riboflavin	DB00315	Zolmitriptan	DDI type 30	The risk or severity of hypertension can be increased when Zolmitriptan is combined with Riboflavin.	0.945973	0	FALSE	TRUE
DB00140	Riboflavin	DB00315	Zolmitriptan	DDI type 15	Riboflavin may decrease the excretion rate of Zolmitriptan which could result in a higher serum level.	0.995777	0	FALSE	FALSE
DB00140	Riboflavin	DB00332	Ipratropium	DDI type 15	Riboflavin may decrease the excretion rate of Ipratropium which could result in a higher serum level.	0.991376	0	FALSE	FALSE
DB00140	Riboflavin	DB00341	Cetirizine	DDI type 15	Riboflavin may decrease the excretion rate of Cetirizine which could result in a higher serum level.	0.999558	0	FALSE	FALSE
DB00140	Riboflavin	DB00399	Zoledronic acid	DDI type 63	Riboflavin may increase the hypocalcemic activities of Zoledronic acid.	0.992084	0	FALSE	FALSE
DB00140	Riboflavin	DB00440	Trimethoprim	DDI type 15	Riboflavin may decrease the excretion rate of Trimethoprim which could result in a higher serum level.	0.996587	0	FALSE	FALSE
DB00140	Riboflavin	DB00455	Loratadine	DDI type 15	Riboflavin may decrease the excretion rate of Loratadine which could result in a higher serum level.	0.96144	0	FALSE	FALSE
DB00140	Riboflavin	DB00468	Quinine	DDI type 15	Riboflavin may decrease the excretion rate of Quinine which could result in a higher serum level.	0.996282	0	FALSE	FALSE
DB00140	Riboflavin	DB00472	Fluoxetine	DDI type 15	Riboflavin may decrease the excretion rate of Fluoxetine which could result in a higher serum level.	0.985799	0	FALSE	FALSE
DB00140	Riboflavin	DB00476	Duloxetine	DDI type 15	Riboflavin may decrease the excretion rate of Duloxetine which could result in a higher serum level.	0.999075	0	FALSE	FALSE
DB00140	Riboflavin	DB00497	Oxycodone	DDI type 13	The therapeutic efficacy of Oxycodone can be decreased when used in combination with Riboflavin.	0.949003	0	FALSE	FALSE
DB00140	Riboflavin	DB00537	Ciprofloxacin	DDI type 15	Riboflavin may decrease the excretion rate of Ciprofloxacin which could result in a higher serum level.	0.999343	0	FALSE	FALSE
DB00140	Riboflavin	DB00564	Carbamazepine	DDI type 13	The therapeutic efficacy of Carbamazepine can be decreased when used in combination with Riboflavin.	0.976795	0	FALSE	FALSE
DB00140	Riboflavin	DB00581	Lactulose	DDI type 13	The therapeutic efficacy of Lactulose can be decreased when used in combination with Riboflavin.	0.994415	0	FALSE	FALSE
DB00140	Riboflavin	DB00641	Simvastatin	DDI type 15	Riboflavin may decrease the excretion rate of Simvastatin which could result in a higher serum level.	0.983675	0	FALSE	FALSE
DB00140	Riboflavin	DB00669	Sumatriptan	DDI type 30	The risk or severity of hypertension can be increased when Sumatriptan is combined with Riboflavin.	0.99926	0	FALSE	TRUE
DB00140	Riboflavin	DB00669	Sumatriptan	DDI type 15	Riboflavin may decrease the excretion rate of Sumatriptan which could result in a higher serum level.	0.998276	0	FALSE	FALSE
DB00140	Riboflavin	DB00675	Tamoxifen	DDI type 15	Riboflavin may decrease the excretion rate of Tamoxifen which could result in a higher serum level.	0.976747	0	FALSE	FALSE
DB00140	Riboflavin	DB00706	Tamsulosin	DDI type 15	Riboflavin may decrease the excretion rate of Tamsulosin which could result in a higher serum level.	0.996133	0	FALSE	FALSE
DB00140	Riboflavin	DB00741	Hydrocortisone	DDI type 15	Riboflavin may decrease the excretion rate of Hydrocortisone which could result in a higher serum level.	0.959159	0	FALSE	FALSE
DB00140	Riboflavin	DB00764	Mometasone	DDI type 26	The risk or severity of adverse effects can be increased when Riboflavin is combined with Mometasone.	0.963025	0	FALSE	TRUE
DB00140	Riboflavin	DB00776	Oxcarbazepine	DDI type 13	The therapeutic efficacy of Oxcarbazepine can be decreased when used in combination with Riboflavin.	0.978522	0	FALSE	FALSE
DB00140	Riboflavin	DB00794	Primidone	DDI type 13	The therapeutic efficacy of Primidone can be decreased when used in combination with Riboflavin.	0.983966	0	FALSE	FALSE
DB00140	Riboflavin	DB00820	Tadalafil	DDI type 15	Riboflavin may decrease the excretion rate of Tadalafil which could result in a higher serum level.	0.999114	0	FALSE	FALSE
DB00140	Riboflavin	DB00829	Diazepam	DDI type 13	The therapeutic efficacy of Diazepam can be decreased when used in combination with Riboflavin.	0.989951	0	FALSE	FALSE
DB00140	Riboflavin	DB00829	Diazepam	DDI type 15	Riboflavin may decrease the excretion rate of Diazepam which could result in a higher serum level.	0.991734	0	FALSE	FALSE
DB00140	Riboflavin	DB00863	Ranitidine	DDI type 15	Riboflavin may decrease the excretion rate of Ranitidine which could result in a higher serum level.	0.988782	0	FALSE	FALSE
DB00140	Riboflavin	DB00884	Risedronic acid	DDI type 63	Riboflavin may increase the hypocalcemic activities of Risedronic acid.	0.971902	0	FALSE	FALSE
DB00140	Riboflavin	DB00951	Isoniazid	DDI type 15	Riboflavin may decrease the excretion rate of Isoniazid which could result in a higher serum level.	0.999554	0	FALSE	FALSE
DB00140	Riboflavin	DB00952	Naratriptan	DDI type 30	The risk or severity of hypertension can be increased when Naratriptan is combined with Riboflavin.	0.99879	0	FALSE	TRUE
DB00140	Riboflavin	DB00953	Rizatriptan	DDI type 30	The risk or severity of hypertension can be increased when Rizatriptan is combined with Riboflavin.	0.979198	0	FALSE	TRUE
DB00140	Riboflavin	DB00973	Ezetimibe	DDI type 15	Riboflavin may decrease the excretion rate of Ezetimibe which could result in a higher serum level.	0.999686	0	FALSE	FALSE
DB00140	Riboflavin	DB00983	Formoterol	DDI type 15	Riboflavin may decrease the excretion rate of Formoterol which could result in a higher serum level.	0.997653	0	FALSE	FALSE
DB00140	Riboflavin	DB00996	Gabapentin	DDI type 13	The therapeutic efficacy of Gabapentin can be decreased when used in combination with Riboflavin.	0.972429	0	FALSE	FALSE
DB00140	Riboflavin	DB01001	Salbutamol	DDI type 15	Riboflavin may decrease the excretion rate of Salbutamol which could result in a higher serum level.	0.999415	0	FALSE	FALSE
DB00140	Riboflavin	DB01015	Sulfamethoxazole	DDI type 15	Riboflavin may decrease the excretion rate of Sulfamethoxazole which could result in a higher serum level.	0.999566	0	FALSE	FALSE
DB00140	Riboflavin	DB01019	Bethanechol	DDI type 13	The therapeutic efficacy of Bethanechol can be decreased when used in combination with Riboflavin.	0.967719	0	FALSE	FALSE
DB00140	Riboflavin	DB01036	Tolterodine	DDI type 15	Riboflavin may decrease the excretion rate of Tolterodine which could result in a higher serum level.	0.999814	0	FALSE	FALSE
DB00140	Riboflavin	DB01039	Fenofibrate	DDI type 15	Riboflavin may decrease the excretion rate of Fenofibrate which could result in a higher serum level.	0.999607	0	FALSE	FALSE
DB00140	Riboflavin	DB01043	Memantine	DDI type 15	Riboflavin may decrease the excretion rate of Memantine which could result in a higher serum level.	0.992869	0	FALSE	FALSE
DB00140	Riboflavin	DB01068	Clonazepam	DDI type 13	The therapeutic efficacy of Clonazepam can be decreased when used in combination with Riboflavin.	0.998427	0	FALSE	FALSE
DB00140	Riboflavin	DB01068	Clonazepam	DDI type 15	Riboflavin may decrease the excretion rate of Clonazepam which could result in a higher serum level.	0.998004	0	FALSE	FALSE
DB00140	Riboflavin	DB01075	Diphenhydramine	DDI type 15	Riboflavin may decrease the excretion rate of Diphenhydramine which could result in a higher serum level.	0.993626	0	FALSE	FALSE
DB00140	Riboflavin	DB01076	Atorvastatin	DDI type 6	The metabolism of Atorvastatin can be decreased when combined with Riboflavin.	0.996946	0	FALSE	FALSE
DB00140	Riboflavin	DB01086	Benzocaine	DDI type 6	The metabolism of Benzocaine can be decreased when combined with Riboflavin.	0.990112	0	FALSE	FALSE
DB00140	Riboflavin	DB01095	Fluvastatin	DDI type 6	The metabolism of Fluvastatin can be decreased when combined with Riboflavin.	0.999312	0	FALSE	FALSE
DB00140	Riboflavin	DB01097	Leflunomide	DDI type 26	The risk or severity of adverse effects can be increased when Riboflavin is combined with Leflunomide.	0.974362	0	FALSE	TRUE
DB00140	Riboflavin	DB01097	Leflunomide	DDI type 15	Riboflavin may decrease the excretion rate of Leflunomide which could result in a higher serum level.	0.978728	0	FALSE	FALSE
DB00140	Riboflavin	DB01098	Rosuvastatin	DDI type 15	Riboflavin may decrease the excretion rate of Rosuvastatin which could result in a higher serum level.	0.997872	0	FALSE	FALSE
DB00140	Riboflavin	DB01110	Miconazole	DDI type 15	Riboflavin may decrease the excretion rate of Miconazole which could result in a higher serum level.	0.985942	0	FALSE	FALSE
DB00140	Riboflavin	DB01137	Levofloxacin	DDI type 15	Riboflavin may decrease the excretion rate of Levofloxacin which could result in a higher serum level.	0.999489	0	FALSE	FALSE
DB00140	Riboflavin	DB01156	Bupropion	DDI type 15	Riboflavin may decrease the excretion rate of Bupropion which could result in a higher serum level.	0.983074	0	FALSE	FALSE
DB00140	Riboflavin	DB01183	Naloxone	DDI type 15	Riboflavin may decrease the excretion rate of Naloxone which could result in a higher serum level.	0.99973	0	FALSE	FALSE
DB00140	Riboflavin	DB01195	Flecainide	DDI type 15	Riboflavin may decrease the excretion rate of Flecainide which could result in a higher serum level.	0.99114	0	FALSE	FALSE
DB00140	Riboflavin	DB01197	Captopril	DDI type 30	The risk or severity of hypertension can be increased when Captopril is combined with Riboflavin.	0.960031	0	FALSE	TRUE		Perindopril (DB00790; P12821), Enalaprilat (DB09477; P12821), Zofenopril (DB13166; P12821)
DB00140	Riboflavin	DB01197	Captopril	DDI type 15	Riboflavin may decrease the excretion rate of Captopril which could result in a higher serum level.	0.992664	0	FALSE	FALSE
DB00140	Riboflavin	DB01198	Zopiclone	DDI type 13	The therapeutic efficacy of Zopiclone can be decreased when used in combination with Riboflavin.	0.984941	1	FALSE	FALSE
DB00140	Riboflavin	DB01198	Zopiclone	DDI type 15	Riboflavin may decrease the excretion rate of Zopiclone which could result in a higher serum level.	0.989051	1	FALSE	FALSE
DB00140	Riboflavin	DB01204	Mitoxantrone	DDI type 26	The risk or severity of adverse effects can be increased when Riboflavin is combined with Mitoxantrone.	0.9506	0	FALSE	TRUE		Daunorubicin (DB00694; DNA|P11388), Idarubicin (DB01177; DNA|P11388)
DB00140	Riboflavin	DB01216	Finasteride	DDI type 30	The risk or severity of hypertension can be increased when Finasteride is combined with Riboflavin.	0.968194	0	FALSE	TRUE
DB00140	Riboflavin	DB01222	Budesonide	DDI type 15	Riboflavin may decrease the excretion rate of Budesonide which could result in a higher serum level.	0.953967	0	FALSE	FALSE
DB00140	Riboflavin	DB01233	Metoclopramide	DDI type 15	Riboflavin may decrease the excretion rate of Metoclopramide which could result in a higher serum level.	0.998632	0	FALSE	FALSE
DB00140	Riboflavin	DB01261	Sitagliptin	DDI type 15	Riboflavin may decrease the excretion rate of Sitagliptin which could result in a higher serum level.	0.993146	0	FALSE	FALSE
DB00140	Riboflavin	DB01390	Sodium bicarbonate	DDI type 15	Riboflavin may decrease the excretion rate of Sodium bicarbonate which could result in a higher serum level.	0.987047	1	FALSE	FALSE
DB00140	Riboflavin	DB01409	Tiotropium	DDI type 15	Riboflavin may decrease the excretion rate of Tiotropium which could result in a higher serum level.	0.999248	0	FALSE	FALSE
DB00140	Riboflavin	DB01422	Nitroxoline	DDI type 15	Riboflavin may decrease the excretion rate of Nitroxoline which could result in a higher serum level.	0.999604	0	FALSE	FALSE
DB00140	Riboflavin	DB01611	Hydroxychloroquine	DDI type 26	The risk or severity of adverse effects can be increased when Riboflavin is combined with Hydroxychloroquine.	0.997066	0	FALSE	TRUE
DB00140	Riboflavin	DB01783	Pantothenic acid	DDI type 15	Riboflavin may decrease the excretion rate of Pantothenic acid which could result in a higher serum level.	0.996122	3	FALSE	FALSE
DB00140	Riboflavin	DB02300	Calcipotriol	DDI type 26	The risk or severity of adverse effects can be increased when Riboflavin is combined with Calcipotriol.	0.985591	0	FALSE	TRUE
DB00140	Riboflavin	DB02714	3'-Uridinemonophosphate	DDI type 26	The risk or severity of adverse effects can be increased when Riboflavin is combined with 3'-Uridinemonophosphate.	0.991447	0	FALSE	TRUE
DB00140	Riboflavin	DB03766	Propanoic acid	DDI type 15	Riboflavin may decrease the excretion rate of Propanoic acid which could result in a higher serum level.	0.949839	0	FALSE	FALSE
DB00140	Riboflavin	DB04216	Quercetin	DDI type 6	The metabolism of Quercetin can be decreased when combined with Riboflavin.	0.990302	0	FALSE	FALSE
DB00140	Riboflavin	DB04398	Lactic acid	DDI type 15	Riboflavin may decrease the excretion rate of Lactic acid which could result in a higher serum level.	0.96218	0	FALSE	FALSE
DB00140	Riboflavin	DB04896	Milnacipran	DDI type 15	Riboflavin may decrease the excretion rate of Milnacipran which could result in a higher serum level.	0.973178	0	FALSE	FALSE
DB00140	Riboflavin	DB05541	Brivaracetam	DDI type 15	Riboflavin may decrease the excretion rate of Brivaracetam which could result in a higher serum level.	0.997252	0	FALSE	FALSE
DB00140	Riboflavin	DB06151	Acetylcysteine	DDI type 15	Riboflavin may decrease the excretion rate of Acetylcysteine which could result in a higher serum level.	0.999525	0	FALSE	FALSE
DB00140	Riboflavin	DB06228	Rivaroxaban	DDI type 15	Riboflavin may decrease the excretion rate of Rivaroxaban which could result in a higher serum level.	0.96589	0	FALSE	FALSE
DB00140	Riboflavin	DB06264	Tolperisone	DDI type 15	Riboflavin may decrease the excretion rate of Tolperisone which could result in a higher serum level.	0.999493	0	FALSE	FALSE
DB00140	Riboflavin	DB06335	Saxagliptin	DDI type 14	The therapeutic efficacy of Saxagliptin can be increased when used in combination with Riboflavin.	0.975961	0	FALSE	FALSE
DB00140	Riboflavin	DB06335	Saxagliptin	DDI type 15	Riboflavin may decrease the excretion rate of Saxagliptin which could result in a higher serum level.	0.995839	0	FALSE	FALSE
DB00140	Riboflavin	DB06623	Flupirtine	DDI type 15	Riboflavin may decrease the excretion rate of Flupirtine which could result in a higher serum level.	0.999725	0	FALSE	FALSE
DB00140	Riboflavin	DB06637	Dalfampridine	DDI type 15	Riboflavin may decrease the excretion rate of Dalfampridine which could result in a higher serum level.	0.999923	0	FALSE	FALSE
DB00140	Riboflavin	DB06698	Betahistine	DDI type 30	The risk or severity of hypertension can be increased when Betahistine is combined with Riboflavin.	0.999076	0	FALSE	TRUE
DB00140	Riboflavin	DB08893	Mirabegron	DDI type 15	Riboflavin may decrease the excretion rate of Mirabegron which could result in a higher serum level.	0.99264	0	FALSE	FALSE
DB00140	Riboflavin	DB08906	Fluticasone furoate	DDI type 26	The risk or severity of adverse effects can be increased when Riboflavin is combined with Fluticasone furoate.	0.968167	0	FALSE	TRUE		Hydrocortamate (DB00769; P04150), Budesonide (DB01222; P04150), Dexamethasone acetate (DB14649; P04150)
DB00140	Riboflavin	DB08908	Dimethyl fumarate	DDI type 26	The risk or severity of adverse effects can be increased when Riboflavin is combined with Dimethyl fumarate.	0.999953	0	FALSE	TRUE
DB00140	Riboflavin	DB08984	Etofenamate	DDI type 30	The risk or severity of hypertension can be increased when Etofenamate is combined with Riboflavin.	0.998593	0	FALSE	TRUE
DB00140	Riboflavin	DB09070	Tibolone	DDI type 15	Riboflavin may decrease the excretion rate of Tibolone which could result in a higher serum level.	0.946229	0	FALSE	FALSE
DB00140	Riboflavin	DB09082	Vilanterol	DDI type 26	The risk or severity of adverse effects can be increased when Riboflavin is combined with Vilanterol.	0.993229	0	FALSE	TRUE		Orciprenaline (DB00816; P07550), Ritodrine (DB00867; P07550), Terbutaline (DB00871; P07550), Formoterol (DB00983; P07550), Salbutamol (DB01001; P07550), Arformoterol (DB01274; P07550), Fenoterol (DB01288; P07550), Droxidopa (DB06262; P07550), Protokylol (DB06814; P07550), Olodaterol (DB09080; P07550), Racepinephrine (DB11124; P07550), Etafedrine (DB11587; P07550), Levosalbutamol (DB13139; P07550)
DB00140	Riboflavin	DB09123	Dienogest	DDI type 15	Riboflavin may decrease the excretion rate of Dienogest which could result in a higher serum level.	0.997572	0	FALSE	FALSE
DB00140	Riboflavin	DB09153	Sodium chloride	DDI type 15	Riboflavin may decrease the excretion rate of Sodium chloride which could result in a higher serum level.	0.999684	1	FALSE	FALSE
DB00140	Riboflavin	DB09268	Picosulfuric acid	DDI type 15	Riboflavin may decrease the excretion rate of Picosulfuric acid which could result in a higher serum level.	0.999327	0	FALSE	FALSE
DB00140	Riboflavin	DB09286	Pipamperone	DDI type 13	The therapeutic efficacy of Pipamperone can be decreased when used in combination with Riboflavin.	0.958556	1	FALSE	FALSE
DB00140	Riboflavin	DB09289	Tianeptine	DDI type 30	The risk or severity of hypertension can be increased when Tianeptine is combined with Riboflavin.	0.995675	0	FALSE	TRUE
DB00140	Riboflavin	DB09289	Tianeptine	DDI type 6	The metabolism of Tianeptine can be decreased when combined with Riboflavin.	0.94309	0	FALSE	FALSE
DB00140	Riboflavin	DB09292	Sacubitril	DDI type 15	Riboflavin may decrease the excretion rate of Sacubitril which could result in a higher serum level.	0.999843	0	FALSE	FALSE
DB00140	Riboflavin	DB09300	Butylscopolamine	DDI type 15	Riboflavin may decrease the excretion rate of Butylscopolamine which could result in a higher serum level.	0.993885	0	FALSE	FALSE
DB00140	Riboflavin	DB11642	Pitolisant	DDI type 15	Riboflavin may decrease the excretion rate of Pitolisant which could result in a higher serum level.	0.991735	0	FALSE	FALSE
DB00140	Riboflavin	DB12016	Ponesimod	DDI type 26	The risk or severity of adverse effects can be increased when Riboflavin is combined with Ponesimod.	0.997264	0	FALSE	TRUE
DB00140	Riboflavin	DB12278	Propiverine	DDI type 15	Riboflavin may decrease the excretion rate of Propiverine which could result in a higher serum level.	0.997218	0	FALSE	FALSE
DB00140	Riboflavin	DB12310	Trehalose	DDI type 13	The therapeutic efficacy of Trehalose can be decreased when used in combination with Riboflavin.	0.995446	0	FALSE	FALSE
DB00140	Riboflavin	DB12582	Piperine	DDI type 13	The therapeutic efficacy of Piperine can be decreased when used in combination with Riboflavin.	0.997597	0	FALSE	FALSE
DB00140	Riboflavin	DB12612	Ozanimod	DDI type 15	Riboflavin may decrease the excretion rate of Ozanimod which could result in a higher serum level.	0.997119	0	FALSE	FALSE
DB00140	Riboflavin	DB12783	Benserazide	DDI type 15	Riboflavin may decrease the excretion rate of Benserazide which could result in a higher serum level.	0.997843	0	FALSE	FALSE
DB00140	Riboflavin	DB12930	Opipramol	DDI type 30	The risk or severity of hypertension can be increased when Opipramol is combined with Riboflavin.	0.993999	0	FALSE	TRUE
DB00140	Riboflavin	DB13178	Inositol	DDI type 15	Riboflavin may decrease the excretion rate of Inositol which could result in a higher serum level.	0.986017	0	FALSE	FALSE
DB00140	Riboflavin	DB13324	Tetrazepam	DDI type 13	The therapeutic efficacy of Tetrazepam can be decreased when used in combination with Riboflavin.	0.998414	0	FALSE	FALSE
DB00140	Riboflavin	DB13324	Tetrazepam	DDI type 15	Riboflavin may decrease the excretion rate of Tetrazepam which could result in a higher serum level.	0.992498	0	FALSE	FALSE
DB00140	Riboflavin	DB13803	Xipamide	DDI type 15	Riboflavin may decrease the excretion rate of Xipamide which could result in a higher serum level.	0.999718	0	FALSE	FALSE
DB00140	Riboflavin	DB14219	Monomethyl fumarate	DDI type 26	The risk or severity of adverse effects can be increased when Riboflavin is combined with Monomethyl fumarate.	0.988943	0	FALSE	TRUE
DB00140	Riboflavin	DB14219	Monomethyl fumarate	DDI type 15	Riboflavin may decrease the excretion rate of Monomethyl fumarate which could result in a higher serum level.	0.968493	0	FALSE	FALSE
DB00140	Riboflavin	DB14513	Magnesium	DDI type 9	The serum concentration of Magnesium can be decreased when it is combined with Riboflavin.	0.997875	0	FALSE	FALSE
DB00140	Riboflavin	DB14634	Fluprednidene acetate	DDI type 26	The risk or severity of adverse effects can be increased when Riboflavin is combined with Fluprednidene acetate.	0.982957	0	FALSE	TRUE
DB00140	Riboflavin	DB14681	Cortisone	DDI type 15	Riboflavin may decrease the excretion rate of Cortisone which could result in a higher serum level.	0.996732	0	FALSE	FALSE
DB00140	Riboflavin	DB14783	Diroximel fumarate	DDI type 26	The risk or severity of adverse effects can be increased when Riboflavin is combined with Diroximel fumarate.	0.999189	0	FALSE	TRUE
DB00140	Riboflavin	DB15578	Desfesoterodine	DDI type 15	Riboflavin may decrease the excretion rate of Desfesoterodine which could result in a higher serum level.	0.999664	0	FALSE	FALSE
DB00140	Riboflavin	DB16852	Remibrutinib	DDI type 10	The serum concentration of Remibrutinib can be increased when it is combined with Riboflavin.	0.995925	0	FALSE	FALSE
DB00152	Thiamine	DB00115	Cyanocobalamin	DDI type 15	Thiamine may decrease the excretion rate of Cyanocobalamin which could result in a higher serum level.	0.999442	25	FALSE	FALSE
DB00152	Thiamine	DB00121	Biotin	DDI type 15	Thiamine may decrease the excretion rate of Biotin which could result in a higher serum level.	0.994515	3	FALSE	FALSE
DB00152	Thiamine	DB00122	Choline	DDI type 15	Thiamine may decrease the excretion rate of Choline which could result in a higher serum level.	0.998502	0	FALSE	FALSE
DB00152	Thiamine	DB00125	Arginine	DDI type 26	The risk or severity of adverse effects can be increased when Thiamine is combined with Arginine.	0.999911	0	FALSE	TRUE
DB00152	Thiamine	DB00126	Ascorbic acid	DDI type 15	Thiamine may decrease the excretion rate of Ascorbic acid which could result in a higher serum level.	0.969868	4	FALSE	FALSE
DB00152	Thiamine	DB00134	Methionine	DDI type 26	The risk or severity of adverse effects can be increased when Thiamine is combined with Methionine.	0.998896	1	FALSE	TRUE
DB00152	Thiamine	DB00137	Lutein	DDI type 26	The risk or severity of adverse effects can be increased when Thiamine is combined with Lutein.	0.998361	1	FALSE	TRUE
DB00152	Thiamine	DB00138	Cystine	DDI type 15	Thiamine may decrease the excretion rate of Cystine which could result in a higher serum level.	0.999786	1	FALSE	FALSE
DB00152	Thiamine	DB00138	Cystine	DDI type 26	The risk or severity of adverse effects can be increased when Thiamine is combined with Cystine.	0.986862	1	FALSE	TRUE
DB00152	Thiamine	DB00158	Folic acid	DDI type 15	Thiamine may decrease the excretion rate of Folic acid which could result in a higher serum level.	0.982184	4	FALSE	FALSE
DB00152	Thiamine	DB00162	Vitamin A	DDI type 15	Thiamine may decrease the excretion rate of Vitamin A which could result in a higher serum level.	0.986163	2	FALSE	FALSE
DB00152	Thiamine	DB00165	Pyridoxine	DDI type 15	Thiamine may decrease the excretion rate of Pyridoxine which could result in a higher serum level.	0.940719	25	FALSE	FALSE
DB00152	Thiamine	DB00175	Pravastatin	DDI type 15	Thiamine may decrease the excretion rate of Pravastatin which could result in a higher serum level.	0.999743	0	FALSE	FALSE
DB00152	Thiamine	DB00186	Lorazepam	DDI type 15	Thiamine may decrease the excretion rate of Lorazepam which could result in a higher serum level.	0.99899	1	FALSE	FALSE
DB00152	Thiamine	DB00190	Carbidopa	DDI type 15	Thiamine may decrease the excretion rate of Carbidopa which could result in a higher serum level.	0.99993	0	FALSE	FALSE
DB00152	Thiamine	DB00193	Tramadol	DDI type 15	Thiamine may decrease the excretion rate of Tramadol which could result in a higher serum level.	0.963331	0	FALSE	FALSE
DB00152	Thiamine	DB00213	Pantoprazole	DDI type 15	Thiamine may decrease the excretion rate of Pantoprazole which could result in a higher serum level.	0.995433	7	FALSE	FALSE
DB00152	Thiamine	DB00215	Citalopram	DDI type 10	The serum concentration of Citalopram can be increased when it is combined with Thiamine.	0.997315	0	FALSE	FALSE
DB00152	Thiamine	DB00222	Glimepiride	DDI type 10	The serum concentration of Glimepiride can be increased when it is combined with Thiamine.	0.969029	0	FALSE	FALSE
DB00152	Thiamine	DB00242	Cladribine	DDI type 10	The serum concentration of Cladribine can be increased when it is combined with Thiamine.	0.996718	0	FALSE	FALSE
DB00152	Thiamine	DB00254	Doxycycline	DDI type 15	Thiamine may decrease the excretion rate of Doxycycline which could result in a higher serum level.	0.998855	0	FALSE	FALSE
DB00152	Thiamine	DB00277	Theophylline	DDI type 6	The metabolism of Theophylline can be decreased when combined with Thiamine.	0.995059	0	FALSE	FALSE
DB00152	Thiamine	DB00279	Liothyronine	DDI type 15	Thiamine may decrease the excretion rate of Liothyronine which could result in a higher serum level.	0.996124	0	FALSE	FALSE
DB00152	Thiamine	DB00281	Lidocaine	DDI type 10	The serum concentration of Lidocaine can be increased when it is combined with Thiamine.	0.999571	0	FALSE	FALSE
DB00152	Thiamine	DB00287	Travoprost	DDI type 13	The therapeutic efficacy of Travoprost can be decreased when used in combination with Thiamine.	0.967649	0	FALSE	FALSE
DB00152	Thiamine	DB00321	Amitriptyline	DDI type 10	The serum concentration of Amitriptyline can be increased when it is combined with Thiamine.	0.993926	1	FALSE	FALSE
DB00152	Thiamine	DB00331	Metformin	DDI type 10	The serum concentration of Metformin can be increased when it is combined with Thiamine.	0.999192	2	TRUE	FALSE
DB00152	Thiamine	DB00341	Cetirizine	DDI type 15	Thiamine may decrease the excretion rate of Cetirizine which could result in a higher serum level.	0.99963	0	FALSE	FALSE
DB00152	Thiamine	DB00399	Zoledronic acid	DDI type 63	Thiamine may increase the hypocalcemic activities of Zoledronic acid.	0.998454	0	FALSE	FALSE
DB00152	Thiamine	DB00401	Nisoldipine	DDI type 35	Thiamine may decrease the antihypertensive activities of Nisoldipine.	0.969065	0	FALSE	FALSE
DB00152	Thiamine	DB00451	Levothyroxine	DDI type 15	Thiamine may decrease the excretion rate of Levothyroxine which could result in a higher serum level.	0.993384	0	FALSE	FALSE
DB00152	Thiamine	DB00470	Dronabinol	DDI type 10	The serum concentration of Dronabinol can be increased when it is combined with Thiamine.	0.999833	2	FALSE	FALSE
DB00152	Thiamine	DB00564	Carbamazepine	DDI type 26	The risk or severity of adverse effects can be increased when Thiamine is combined with Carbamazepine.	0.978135	0	FALSE	TRUE		Topiramate (DB00273; P35498), Lamotrigine (DB00555; P35498)
DB00152	Thiamine	DB00581	Lactulose	DDI type 13	The therapeutic efficacy of Lactulose can be decreased when used in combination with Thiamine.	0.999461	0	FALSE	FALSE
DB00152	Thiamine	DB00583	Levocarnitine	DDI type 15	Thiamine may decrease the excretion rate of Levocarnitine which could result in a higher serum level.	0.997707	0	FALSE	FALSE
DB00152	Thiamine	DB00584	Enalapril	DDI type 67	Thiamine may increase the hypotensive activities of Enalapril.	0.986742	0	FALSE	FALSE
DB00152	Thiamine	DB00584	Enalapril	DDI type 15	Thiamine may decrease the excretion rate of Enalapril which could result in a higher serum level.	0.977207	0	FALSE	FALSE
DB00152	Thiamine	DB00586	Diclofenac	DDI type 30	The risk or severity of hypertension can be increased when Diclofenac is combined with Thiamine.	0.974748	0	FALSE	TRUE		Mesalazine (DB00244; P35354|P23219), Acetaminophen (DB00316; P35354|P23219), Sulfasalazine (DB00795; P35354|P23219), Phenylbutazone (DB00812; P35354|P23219)
DB00152	Thiamine	DB00586	Diclofenac	DDI type 6	The metabolism of Diclofenac can be decreased when combined with Thiamine.	0.987736	0	FALSE	FALSE
DB00152	Thiamine	DB00630	Alendronic acid	DDI type 63	Thiamine may increase the hypocalcemic activities of Alendronic acid.	0.967966	0	FALSE	FALSE
DB00152	Thiamine	DB00635	Prednisone	DDI type 15	Thiamine may decrease the excretion rate of Prednisone which could result in a higher serum level.	0.999411	0	FALSE	FALSE
DB00152	Thiamine	DB00641	Simvastatin	DDI type 6	The metabolism of Simvastatin can be decreased when combined with Thiamine.	0.956327	1	FALSE	FALSE
DB00152	Thiamine	DB00654	Latanoprost	DDI type 67	Thiamine may increase the hypotensive activities of Latanoprost.	0.987703	0	FALSE	FALSE
DB00152	Thiamine	DB00675	Tamoxifen	DDI type 10	The serum concentration of Tamoxifen can be increased when it is combined with Thiamine.	0.956315	0	FALSE	FALSE
DB00152	Thiamine	DB00687	Fludrocortisone	DDI type 26	The risk or severity of adverse effects can be increased when Thiamine is combined with Fludrocortisone.	0.993643	0	FALSE	TRUE
DB00152	Thiamine	DB00698	Nitrofurantoin	DDI type 15	Thiamine may decrease the excretion rate of Nitrofurantoin which could result in a higher serum level.	0.99964	0	FALSE	FALSE
DB00152	Thiamine	DB00715	Paroxetine	DDI type 10	The serum concentration of Paroxetine can be increased when it is combined with Thiamine.	0.973002	0	FALSE	FALSE
DB00152	Thiamine	DB00722	Lisinopril	DDI type 15	Thiamine may decrease the excretion rate of Lisinopril which could result in a higher serum level.	0.997437	0	FALSE	FALSE
DB00152	Thiamine	DB00726	Trimipramine	DDI type 10	The serum concentration of Trimipramine can be increased when it is combined with Thiamine.	0.990964	0	FALSE	FALSE
DB00152	Thiamine	DB00727	Nitroglycerin	DDI type 35	Thiamine may decrease the antihypertensive activities of Nitroglycerin.	0.976617	0	FALSE	FALSE
DB00152	Thiamine	DB00758	Clopidogrel	DDI type 15	Thiamine may decrease the excretion rate of Clopidogrel which could result in a higher serum level.	0.996983	0	FALSE	FALSE
DB00152	Thiamine	DB00763	Methimazole	DDI type 15	Thiamine may decrease the excretion rate of Methimazole which could result in a higher serum level.	0.980109	0	FALSE	FALSE
DB00152	Thiamine	DB00764	Mometasone	DDI type 26	The risk or severity of adverse effects can be increased when Thiamine is combined with Mometasone.	0.990887	0	FALSE	TRUE
DB00152	Thiamine	DB00788	Naproxen	DDI type 30	The risk or severity of hypertension can be increased when Naproxen is combined with Thiamine.	0.999074	0	FALSE	TRUE		Mesalazine (DB00244; P23219|P35354), Acetaminophen (DB00316; P23219|P35354), Sulfasalazine (DB00795; P23219|P35354), Phenylbutazone (DB00812; P23219|P35354)
DB00152	Thiamine	DB00790	Perindopril	DDI type 15	Thiamine may decrease the excretion rate of Perindopril which could result in a higher serum level.	0.999008	0	FALSE	FALSE
DB00152	Thiamine	DB00794	Primidone	DDI type 26	The risk or severity of adverse effects can be increased when Thiamine is combined with Primidone.	0.991387	0	FALSE	TRUE		Butalbital (DB00241; P47869|P34903|P48169|P31644|Q16445|P14867|P14867), Talbutal (DB00306; P47869|P34903|P48169|P31644|Q16445|P14867|P14867), Pentobarbital (DB00312; P47869|P34903|P48169|P31644|Q16445|P14867|P14867)
DB00152	Thiamine	DB00813	Fentanyl	DDI type 15	Thiamine may decrease the excretion rate of Fentanyl which could result in a higher serum level.	0.973205	0	FALSE	FALSE
DB00152	Thiamine	DB00814	Meloxicam	DDI type 30	The risk or severity of hypertension can be increased when Meloxicam is combined with Thiamine.	0.999529	0	FALSE	TRUE		Mesalazine (DB00244; P35354), Acetaminophen (DB00316; P35354), Rofecoxib (DB00533; P35354), Mefenamic acid (DB00784; P35354), Sulfasalazine (DB00795; P35354), Phenylbutazone (DB00812; P35354), Bromfenac (DB00963; P35354), Fish oil (DB13961; P35354)
DB00152	Thiamine	DB00814	Meloxicam	DDI type 6	The metabolism of Meloxicam can be decreased when combined with Thiamine.	0.998432	0	FALSE	FALSE
DB00152	Thiamine	DB00829	Diazepam	DDI type 15	Thiamine may decrease the excretion rate of Diazepam which could result in a higher serum level.	0.999526	0	FALSE	FALSE
DB00152	Thiamine	DB00860	Prednisolone	DDI type 26	The risk or severity of adverse effects can be increased when Thiamine is combined with Prednisolone.	0.988247	1	FALSE	TRUE		Flunisolide (DB00180; P04150), Beclomethasone dipropionate (DB00394; P04150), Fluocinolone acetonide (DB00591; P04150), Prednisone (DB00635; P04150), Hydrocortamate (DB00769; P04150), Rimexolone (DB00896; P04150), Clobetasol propionate (DB01013; P04150), Budesonide (DB01222; P04150), Desonide (DB01260; P04150), Clobetasone (DB13158; P04150), Dexamethasone acetate (DB14649; P04150), Prednisolone a…
DB00152	Thiamine	DB00863	Ranitidine	DDI type 10	The serum concentration of Ranitidine can be increased when it is combined with Thiamine.	0.999816	0	TRUE	FALSE
DB00152	Thiamine	DB00884	Risedronic acid	DDI type 63	Thiamine may increase the hypocalcemic activities of Risedronic acid.	0.997999	0	FALSE	FALSE
DB00152	Thiamine	DB00904	Ondansetron	DDI type 32	The risk or severity of QTc prolongation can be increased when Thiamine is combined with Ondansetron.	0.993857	1	FALSE	TRUE		Palonosetron (DB00377; P46098), Dolasetron (DB00757; P46098), Alosetron (DB00969; P46098), Metoclopramide (DB01233; P46098), Vortioxetine (DB09068; P46098)
DB00152	Thiamine	DB00904	Ondansetron	DDI type 10	The serum concentration of Ondansetron can be increased when it is combined with Thiamine.	0.997982	1	FALSE	FALSE
DB00152	Thiamine	DB00915	Amantadine	DDI type 10	The serum concentration of Amantadine can be increased when it is combined with Thiamine.	0.99472	0	TRUE	FALSE
DB00152	Thiamine	DB00925	Phenoxybenzamine	DDI type 26	The risk or severity of adverse effects can be increased when Thiamine is combined with Phenoxybenzamine.	0.980644	0	FALSE	TRUE		Dronedarone (DB04855; P35348|P08913)
DB00152	Thiamine	DB00951	Isoniazid	DDI type 10	The serum concentration of Isoniazid can be increased when it is combined with Thiamine.	0.958523	0	FALSE	FALSE
DB00152	Thiamine	DB00966	Telmisartan	DDI type 15	Thiamine may decrease the excretion rate of Telmisartan which could result in a higher serum level.	0.983528	0	FALSE	FALSE
DB00152	Thiamine	DB00973	Ezetimibe	DDI type 15	Thiamine may decrease the excretion rate of Ezetimibe which could result in a higher serum level.	0.999468	0	FALSE	FALSE
DB00152	Thiamine	DB00979	Cyclopentolate	DDI type 13	The therapeutic efficacy of Cyclopentolate can be decreased when used in combination with Thiamine.	0.985079	0	FALSE	FALSE
DB00152	Thiamine	DB00985	Dimenhydrinate	DDI type 32	The risk or severity of QTc prolongation can be increased when Thiamine is combined with Dimenhydrinate.	0.994269	0	FALSE	TRUE		Cetirizine (DB00341; P35367), Cyproheptadine (DB00434; P35367), Loratadine (DB00455; P35367), Chlorpromazine (DB00477; P35367), Astemizole (DB00637; P35367), Meclizine (DB00737; P35367), Methdilazine (DB00902; P35367), Ketotifen (DB00920; P35367), Fexofenadine (DB00950; P35367), Azelastine (DB00972; P35367), Promethazine (DB01069; P35367), Doxepin (DB01142; P35367), Diphenylpyraline (DB01146; P35…
DB00152	Thiamine	DB00989	Rivastigmine	DDI type 52	Thiamine may increase the bradycardic activities of Rivastigmine.	0.998603	0	FALSE	FALSE
DB00152	Thiamine	DB00989	Rivastigmine	DDI type 10	The serum concentration of Rivastigmine can be increased when it is combined with Thiamine.	0.972392	0	FALSE	FALSE
DB00152	Thiamine	DB00996	Gabapentin	DDI type 26	The risk or severity of adverse effects can be increased when Thiamine is combined with Gabapentin.	0.943538	2	FALSE	TRUE		Isradipine (DB00270; P54289), Nisoldipine (DB00401; P54289), Felodipine (DB01023; P54289)
DB00152	Thiamine	DB01001	Salbutamol	DDI type 15	Thiamine may decrease the excretion rate of Salbutamol which could result in a higher serum level.	0.999344	0	FALSE	FALSE
DB00152	Thiamine	DB01015	Sulfamethoxazole	DDI type 15	Thiamine may decrease the excretion rate of Sulfamethoxazole which could result in a higher serum level.	0.996795	0	FALSE	FALSE
DB00152	Thiamine	DB01019	Bethanechol	DDI type 26	The risk or severity of adverse effects can be increased when Thiamine is combined with Bethanechol.	0.999957	0	FALSE	TRUE		Cevimeline (DB00185; P20309), Methacholine (DB06709; P20309)
DB00152	Thiamine	DB01029	Irbesartan	DDI type 6	The metabolism of Irbesartan can be decreased when combined with Thiamine.	0.976456	1	FALSE	FALSE
DB00152	Thiamine	DB01039	Fenofibrate	DDI type 15	Thiamine may decrease the excretion rate of Fenofibrate which could result in a higher serum level.	0.99988	0	FALSE	FALSE
DB00152	Thiamine	DB01043	Memantine	DDI type 10	The serum concentration of Memantine can be increased when it is combined with Thiamine.	0.997542	0	TRUE	FALSE
DB00152	Thiamine	DB01065	Melatonin	DDI type 6	The metabolism of Melatonin can be decreased when combined with Thiamine.	0.99216	0	FALSE	FALSE
DB00152	Thiamine	DB01068	Clonazepam	DDI type 15	Thiamine may decrease the excretion rate of Clonazepam which could result in a higher serum level.	0.999573	0	FALSE	FALSE
DB00152	Thiamine	DB01075	Diphenhydramine	DDI type 15	Thiamine may decrease the excretion rate of Diphenhydramine which could result in a higher serum level.	0.991048	0	FALSE	FALSE
DB00152	Thiamine	DB01086	Benzocaine	DDI type 6	The metabolism of Benzocaine can be decreased when combined with Thiamine.	0.973358	0	FALSE	FALSE
DB00152	Thiamine	DB01097	Leflunomide	DDI type 26	The risk or severity of adverse effects can be increased when Thiamine is combined with Leflunomide.	0.999861	0	FALSE	TRUE
DB00152	Thiamine	DB01097	Leflunomide	DDI type 15	Thiamine may decrease the excretion rate of Leflunomide which could result in a higher serum level.	0.999749	0	FALSE	FALSE
DB00152	Thiamine	DB01098	Rosuvastatin	DDI type 15	Thiamine may decrease the excretion rate of Rosuvastatin which could result in a higher serum level.	0.999108	1	FALSE	FALSE
DB00152	Thiamine	DB01104	Sertraline	DDI type 10	The serum concentration of Sertraline can be increased when it is combined with Thiamine.	0.990358	0	FALSE	FALSE
DB00152	Thiamine	DB01112	Cefuroxime	DDI type 15	Thiamine may decrease the excretion rate of Cefuroxime which could result in a higher serum level.	0.986602	0	FALSE	FALSE
DB00152	Thiamine	DB01137	Levofloxacin	DDI type 15	Thiamine may decrease the excretion rate of Levofloxacin which could result in a higher serum level.	0.999741	0	FALSE	FALSE
DB00152	Thiamine	DB01142	Doxepin	DDI type 15	Thiamine may decrease the excretion rate of Doxepin which could result in a higher serum level.	0.989636	0	FALSE	FALSE
DB00152	Thiamine	DB01175	Escitalopram	DDI type 10	The serum concentration of Escitalopram can be increased when it is combined with Thiamine.	0.997315	2	FALSE	FALSE
DB00152	Thiamine	DB01183	Naloxone	DDI type 15	Thiamine may decrease the excretion rate of Naloxone which could result in a higher serum level.	0.999972	0	FALSE	FALSE
DB00152	Thiamine	DB01195	Flecainide	DDI type 10	The serum concentration of Flecainide can be increased when it is combined with Thiamine.	0.996876	0	FALSE	FALSE
DB00152	Thiamine	DB01198	Zopiclone	DDI type 6	The metabolism of Zopiclone can be decreased when combined with Thiamine.	0.996485	3	FALSE	FALSE
DB00152	Thiamine	DB01222	Budesonide	DDI type 15	Thiamine may decrease the excretion rate of Budesonide which could result in a higher serum level.	0.999518	1	FALSE	FALSE
DB00152	Thiamine	DB01261	Sitagliptin	DDI type 15	Thiamine may decrease the excretion rate of Sitagliptin which could result in a higher serum level.	0.997481	0	FALSE	FALSE
DB00152	Thiamine	DB01288	Fenoterol	DDI type 26	The risk or severity of adverse effects can be increased when Thiamine is combined with Fenoterol.	0.944759	0	FALSE	TRUE		Norepinephrine (DB00368; P07550), Epinephrine (DB00668; P07550), Orciprenaline (DB00816; P07550), Pirbuterol (DB01291; P07550), Ephedrine (DB01364; P07550), Indacaterol (DB05039; P07550), Droxidopa (DB06262; P07550), Protokylol (DB06814; P07550), Racepinephrine (DB11124; P07550), Etafedrine (DB11587; P07550)
DB00152	Thiamine	DB01390	Sodium bicarbonate	DDI type 15	Thiamine may decrease the excretion rate of Sodium bicarbonate which could result in a higher serum level.	0.982043	1	FALSE	FALSE
DB00152	Thiamine	DB01409	Tiotropium	DDI type 15	Thiamine may decrease the excretion rate of Tiotropium which could result in a higher serum level.	0.999024	0	FALSE	FALSE
DB00152	Thiamine	DB01416	Cefpodoxime	DDI type 15	Thiamine may decrease the excretion rate of Cefpodoxime which could result in a higher serum level.	0.976051	0	FALSE	FALSE
DB00152	Thiamine	DB01422	Nitroxoline	DDI type 15	Thiamine may decrease the excretion rate of Nitroxoline which could result in a higher serum level.	0.999803	0	FALSE	FALSE
DB00152	Thiamine	DB01586	Ursodeoxycholic acid	DDI type 15	Thiamine may decrease the excretion rate of Ursodeoxycholic acid which could result in a higher serum level.	0.998905	0	FALSE	FALSE
DB00152	Thiamine	DB01592	Iron	DDI type 15	Thiamine may decrease the excretion rate of Iron which could result in a higher serum level.	0.94295	2	FALSE	FALSE
DB00152	Thiamine	DB01593	Zinc	DDI type 15	Thiamine may decrease the excretion rate of Zinc which could result in a higher serum level.	0.94295	4	FALSE	FALSE
DB00152	Thiamine	DB01611	Hydroxychloroquine	DDI type 26	The risk or severity of adverse effects can be increased when Thiamine is combined with Hydroxychloroquine.	0.999606	0	FALSE	TRUE
DB00152	Thiamine	DB01783	Pantothenic acid	DDI type 15	Thiamine may decrease the excretion rate of Pantothenic acid which could result in a higher serum level.	0.999961	3	FALSE	FALSE
DB00152	Thiamine	DB02714	3'-Uridinemonophosphate	DDI type 26	The risk or severity of adverse effects can be increased when Thiamine is combined with 3'-Uridinemonophosphate.	0.999829	0	FALSE	TRUE
DB00152	Thiamine	DB03766	Propanoic acid	DDI type 15	Thiamine may decrease the excretion rate of Propanoic acid which could result in a higher serum level.	0.953621	0	FALSE	FALSE
DB00152	Thiamine	DB04398	Lactic acid	DDI type 26	The risk or severity of adverse effects can be increased when Thiamine is combined with Lactic acid.	0.997558	0	FALSE	TRUE
DB00152	Thiamine	DB04398	Lactic acid	DDI type 15	Thiamine may decrease the excretion rate of Lactic acid which could result in a higher serum level.	0.984512	0	FALSE	FALSE
DB00152	Thiamine	DB04703	Hesperidin	DDI type 26	The risk or severity of adverse effects can be increased when Thiamine is combined with Hesperidin.	0.994957	0	FALSE	TRUE
DB00152	Thiamine	DB05382	Iodine	DDI type 15	Thiamine may decrease the excretion rate of Iodine which could result in a higher serum level.	0.955912	0	FALSE	FALSE
DB00152	Thiamine	DB05541	Brivaracetam	DDI type 15	Thiamine may decrease the excretion rate of Brivaracetam which could result in a higher serum level.	0.999588	0	FALSE	FALSE
DB00152	Thiamine	DB06151	Acetylcysteine	DDI type 15	Thiamine may decrease the excretion rate of Acetylcysteine which could result in a higher serum level.	0.99995	0	FALSE	FALSE
DB00152	Thiamine	DB06204	Tapentadol	DDI type 10	The serum concentration of Tapentadol can be increased when it is combined with Thiamine.	0.994348	0	FALSE	FALSE
DB00152	Thiamine	DB06228	Rivaroxaban	DDI type 15	Thiamine may decrease the excretion rate of Rivaroxaban which could result in a higher serum level.	0.973979	0	FALSE	FALSE
DB00152	Thiamine	DB06264	Tolperisone	DDI type 15	Thiamine may decrease the excretion rate of Tolperisone which could result in a higher serum level.	0.993869	0	FALSE	FALSE
DB00152	Thiamine	DB06335	Saxagliptin	DDI type 15	Thiamine may decrease the excretion rate of Saxagliptin which could result in a higher serum level.	0.998451	0	FALSE	FALSE
DB00152	Thiamine	DB06594	Agomelatine	DDI type 10	The serum concentration of Agomelatine can be increased when it is combined with Thiamine.	0.953774	0	FALSE	FALSE
DB00152	Thiamine	DB06605	Apixaban	DDI type 10	The serum concentration of Apixaban can be increased when it is combined with Thiamine.	0.9984	0	FALSE	FALSE
DB00152	Thiamine	DB06623	Flupirtine	DDI type 15	Thiamine may decrease the excretion rate of Flupirtine which could result in a higher serum level.	0.999812	0	FALSE	FALSE
DB00152	Thiamine	DB06637	Dalfampridine	DDI type 10	The serum concentration of Dalfampridine can be increased when it is combined with Thiamine.	0.997917	2	TRUE	FALSE
DB00152	Thiamine	DB06698	Betahistine	DDI type 26	The risk or severity of adverse effects can be increased when Thiamine is combined with Betahistine.	0.994307	0	FALSE	TRUE
DB00152	Thiamine	DB06698	Betahistine	DDI type 10	The serum concentration of Betahistine can be increased when it is combined with Thiamine.	0.974356	0	FALSE	FALSE
DB00152	Thiamine	DB06755	Beta carotene	DDI type 26	The risk or severity of adverse effects can be increased when Thiamine is combined with Beta carotene.	0.999462	0	FALSE	TRUE		Tocopherol (DB11251; Free radicals), alpha-Tocopherol acetate (DB14003; Free radicals)
DB00152	Thiamine	DB06825	Triptorelin	DDI type 32	The risk or severity of QTc prolongation can be increased when Thiamine is combined with Triptorelin.	0.999556	0	FALSE	TRUE
DB00152	Thiamine	DB08801	Dimetindene	DDI type 15	Thiamine may decrease the excretion rate of Dimetindene which could result in a higher serum level.	0.967018	1	FALSE	FALSE
DB00152	Thiamine	DB08818	Hyaluronic acid	DDI type 15	Thiamine may decrease the excretion rate of Hyaluronic acid which could result in a higher serum level.	0.999208	0	FALSE	FALSE
DB00152	Thiamine	DB08868	Fingolimod	DDI type 69	Thiamine may increase the immunosuppressive activities of Fingolimod.	0.998695	1	FALSE	FALSE
DB00152	Thiamine	DB08880	Teriflunomide	DDI type 26	The risk or severity of adverse effects can be increased when Thiamine is combined with Teriflunomide.	0.9958	1	FALSE	TRUE
DB00152	Thiamine	DB08893	Mirabegron	DDI type 15	Thiamine may decrease the excretion rate of Mirabegron which could result in a higher serum level.	0.998368	0	FALSE	FALSE
DB00152	Thiamine	DB08906	Fluticasone furoate	DDI type 26	The risk or severity of adverse effects can be increased when Thiamine is combined with Fluticasone furoate.	0.998961	0	FALSE	TRUE		Flunisolide (DB00180; P04150), Beclomethasone dipropionate (DB00394; P04150), Fluocinolone acetonide (DB00591; P04150), Prednisone (DB00635; P04150), Hydrocortamate (DB00769; P04150), Rimexolone (DB00896; P04150), Clobetasol propionate (DB01013; P04150), Budesonide (DB01222; P04150), Desonide (DB01260; P04150), Clobetasone (DB13158; P04150), Dexamethasone acetate (DB14649; P04150), Prednisolone a…
DB00152	Thiamine	DB08908	Dimethyl fumarate	DDI type 26	The risk or severity of adverse effects can be increased when Thiamine is combined with Dimethyl fumarate.	0.999979	1	FALSE	TRUE
DB00152	Thiamine	DB09020	Bisacodyl	DDI type 13	The therapeutic efficacy of Bisacodyl can be decreased when used in combination with Thiamine.	0.999565	0	FALSE	FALSE
DB00152	Thiamine	DB09082	Vilanterol	DDI type 26	The risk or severity of adverse effects can be increased when Thiamine is combined with Vilanterol.	0.999651	0	FALSE	TRUE		Norepinephrine (DB00368; P07550), Epinephrine (DB00668; P07550), Orciprenaline (DB00816; P07550), Pirbuterol (DB01291; P07550), Ephedrine (DB01364; P07550), Indacaterol (DB05039; P07550), Droxidopa (DB06262; P07550), Protokylol (DB06814; P07550), Racepinephrine (DB11124; P07550), Etafedrine (DB11587; P07550)
DB00152	Thiamine	DB09083	Ivabradine	DDI type 10	The serum concentration of Ivabradine can be increased when it is combined with Thiamine.	0.999524	0	FALSE	FALSE
DB00152	Thiamine	DB09123	Dienogest	DDI type 15	Thiamine may decrease the excretion rate of Dienogest which could result in a higher serum level.	0.998658	1	FALSE	FALSE
DB00152	Thiamine	DB09153	Sodium chloride	DDI type 15	Thiamine may decrease the excretion rate of Sodium chloride which could result in a higher serum level.	0.999872	1	FALSE	FALSE
DB00152	Thiamine	DB09268	Picosulfuric acid	DDI type 15	Thiamine may decrease the excretion rate of Picosulfuric acid which could result in a higher serum level.	0.999835	0	FALSE	FALSE
DB00152	Thiamine	DB09270	Ubidecarenone	DDI type 10	The serum concentration of Ubidecarenone can be increased when it is combined with Thiamine.	0.991606	0	FALSE	FALSE
DB00152	Thiamine	DB09286	Pipamperone	DDI type 26	The risk or severity of adverse effects can be increased when Thiamine is combined with Pipamperone.	0.999839	1	FALSE	TRUE
DB00152	Thiamine	DB09289	Tianeptine	DDI type 30	The risk or severity of hypertension can be increased when Tianeptine is combined with Thiamine.	0.999873	0	FALSE	TRUE
DB00152	Thiamine	DB09289	Tianeptine	DDI type 6	The metabolism of Tianeptine can be decreased when combined with Thiamine.	0.999266	0	FALSE	FALSE
DB00152	Thiamine	DB09292	Sacubitril	DDI type 26	The risk or severity of adverse effects can be increased when Thiamine is combined with Sacubitril.	0.99883	0	FALSE	TRUE
DB00152	Thiamine	DB09292	Sacubitril	DDI type 15	Thiamine may decrease the excretion rate of Sacubitril which could result in a higher serum level.	0.999954	0	FALSE	FALSE
DB00152	Thiamine	DB09512	Simethicone	DDI type 32	The risk or severity of QTc prolongation can be increased when Thiamine is combined with Simethicone.	0.995895	0	FALSE	TRUE
DB00152	Thiamine	DB11073	Cetylpyridinium	DDI type 15	Thiamine may decrease the excretion rate of Cetylpyridinium which could result in a higher serum level.	0.994798	0	FALSE	FALSE
DB00152	Thiamine	DB11135	Selenium	DDI type 15	Thiamine may decrease the excretion rate of Selenium which could result in a higher serum level.	0.94295	3	FALSE	FALSE
DB00152	Thiamine	DB11136	Chromium	DDI type 15	Thiamine may decrease the excretion rate of Chromium which could result in a higher serum level.	0.94295	1	FALSE	FALSE
DB00152	Thiamine	DB12016	Ponesimod	DDI type 26	The risk or severity of adverse effects can be increased when Thiamine is combined with Ponesimod.	0.999714	0	FALSE	TRUE
DB00152	Thiamine	DB12278	Propiverine	DDI type 15	Thiamine may decrease the excretion rate of Propiverine which could result in a higher serum level.	0.990714	0	FALSE	FALSE
DB00152	Thiamine	DB12310	Trehalose	DDI type 13	The therapeutic efficacy of Trehalose can be decreased when used in combination with Thiamine.	0.990837	0	FALSE	FALSE
DB00152	Thiamine	DB12371	Siponimod	DDI type 26	The risk or severity of adverse effects can be increased when Thiamine is combined with Siponimod.	0.991268	0	FALSE	TRUE
DB00152	Thiamine	DB12783	Benserazide	DDI type 15	Thiamine may decrease the excretion rate of Benserazide which could result in a higher serum level.	0.999936	0	FALSE	FALSE
DB00152	Thiamine	DB13178	Inositol	DDI type 15	Thiamine may decrease the excretion rate of Inositol which could result in a higher serum level.	0.999966	0	FALSE	FALSE
DB00152	Thiamine	DB13322	Hydrotalcite	DDI type 1	Thiamine can cause a decrease in the absorption of Hydrotalcite resulting in a reduced serum concentration and potentially a decrease in efficacy.	0.986786	0	FALSE	FALSE
DB00152	Thiamine	DB13324	Tetrazepam	DDI type 15	Thiamine may decrease the excretion rate of Tetrazepam which could result in a higher serum level.	0.988883	0	FALSE	FALSE
DB00152	Thiamine	DB13619	Bornaprine	DDI type 15	Thiamine may decrease the excretion rate of Bornaprine which could result in a higher serum level.	0.999436	1	FALSE	FALSE
DB00152	Thiamine	DB14219	Monomethyl fumarate	DDI type 26	The risk or severity of adverse effects can be increased when Thiamine is combined with Monomethyl fumarate.	0.99988	0	FALSE	TRUE
DB00152	Thiamine	DB14509	Lithium carbonate	DDI type 15	Thiamine may decrease the excretion rate of Lithium carbonate which could result in a higher serum level.	0.998991	0	FALSE	FALSE
DB00152	Thiamine	DB14513	Magnesium	DDI type 9	The serum concentration of Magnesium can be decreased when it is combined with Thiamine.	0.998496	5	FALSE	FALSE
DB00152	Thiamine	DB14513	Magnesium	DDI type 15	Thiamine may decrease the excretion rate of Magnesium which could result in a higher serum level.	0.971609	5	FALSE	FALSE
DB00152	Thiamine	DB14634	Fluprednidene acetate	DDI type 26	The risk or severity of adverse effects can be increased when Thiamine is combined with Fluprednidene acetate.	0.995584	0	FALSE	TRUE
DB00152	Thiamine	DB14681	Cortisone	DDI type 15	Thiamine may decrease the excretion rate of Cortisone which could result in a higher serum level.	0.99962	0	FALSE	FALSE
DB00152	Thiamine	DB14783	Diroximel fumarate	DDI type 26	The risk or severity of adverse effects can be increased when Thiamine is combined with Diroximel fumarate.	0.999744	0	FALSE	TRUE
DB00152	Thiamine	DB15578	Desfesoterodine	DDI type 15	Thiamine may decrease the excretion rate of Desfesoterodine which could result in a higher serum level.	0.988343	0	FALSE	FALSE
DB00152	Thiamine	DB16272	Orelabrutinib	DDI type 6	The metabolism of Orelabrutinib can be decreased when combined with Thiamine.	0.965233	0	FALSE	FALSE
DB00152	Thiamine	DB16852	Remibrutinib	DDI type 10	The serum concentration of Remibrutinib can be increased when it is combined with Thiamine.	0.999686	0	FALSE	FALSE
DB00152	Thiamine	-	Tolebrutinib	DDI type 10	The serum concentration of Tolebrutinib can be increased when it is combined with Thiamine.	0.99029	0	FALSE	FALSE
DB00158	Folic acid	DB00014	Goserelin	DDI type 15	Folic acid may decrease the excretion rate of Goserelin which could result in a higher serum level.	0.999969	0	FALSE	FALSE
DB00158	Folic acid	DB00115	Cyanocobalamin	DDI type 15	Folic acid may decrease the excretion rate of Cyanocobalamin which could result in a higher serum level.	0.999547	15	FALSE	FALSE
DB00158	Folic acid	DB00115	Cyanocobalamin	DDI type 13	The therapeutic efficacy of Cyanocobalamin can be decreased when used in combination with Folic acid.	0.992785	15	FALSE	FALSE
DB00158	Folic acid	DB00121	Biotin	DDI type 15	Folic acid may decrease the excretion rate of Biotin which could result in a higher serum level.	0.999957	4	FALSE	FALSE
DB00158	Folic acid	DB00122	Choline	DDI type 15	Folic acid may decrease the excretion rate of Choline which could result in a higher serum level.	0.998516	0	FALSE	FALSE
DB00158	Folic acid	DB00125	Arginine	DDI type 15	Folic acid may decrease the excretion rate of Arginine which could result in a higher serum level.	0.997637	0	FALSE	FALSE
DB00158	Folic acid	DB00125	Arginine	DDI type 26	The risk or severity of adverse effects can be increased when Folic acid is combined with Arginine.	0.984477	0	FALSE	TRUE
DB00158	Folic acid	DB00126	Ascorbic acid	DDI type 15	Folic acid may decrease the excretion rate of Ascorbic acid which could result in a higher serum level.	0.999528	3	FALSE	FALSE
DB00158	Folic acid	DB00137	Lutein	DDI type 26	The risk or severity of adverse effects can be increased when Folic acid is combined with Lutein.	0.999566	0	FALSE	TRUE
DB00158	Folic acid	DB00138	Cystine	DDI type 15	Folic acid may decrease the excretion rate of Cystine which could result in a higher serum level.	0.999472	0	FALSE	FALSE
DB00158	Folic acid	DB00140	Riboflavin	DDI type 15	Folic acid may decrease the excretion rate of Riboflavin which could result in a higher serum level.	0.981136	3	FALSE	FALSE
DB00158	Folic acid	DB00152	Thiamine	DDI type 15	Folic acid may decrease the excretion rate of Thiamine which could result in a higher serum level.	0.999915	4	FALSE	FALSE
DB00158	Folic acid	DB00162	Vitamin A	DDI type 15	Folic acid may decrease the excretion rate of Vitamin A which could result in a higher serum level.	0.999427	2	FALSE	FALSE
DB00158	Folic acid	DB00163	Vitamin E	DDI type 26	The risk or severity of adverse effects can be increased when Folic acid is combined with Vitamin E.	0.976646	1	FALSE	TRUE
DB00158	Folic acid	DB00165	Pyridoxine	DDI type 15	Folic acid may decrease the excretion rate of Pyridoxine which could result in a higher serum level.	0.999943	4	FALSE	FALSE
DB00158	Folic acid	DB00166	Lipoic acid	DDI type 15	Folic acid may decrease the excretion rate of Lipoic acid which could result in a higher serum level.	0.998895	0	FALSE	FALSE
DB00158	Folic acid	DB00175	Pravastatin	DDI type 15	Folic acid may decrease the excretion rate of Pravastatin which could result in a higher serum level.	0.999872	1	FALSE	FALSE
DB00158	Folic acid	DB00177	Valsartan	DDI type 15	Folic acid may decrease the excretion rate of Valsartan which could result in a higher serum level.	0.999842	2	FALSE	FALSE
DB00158	Folic acid	DB00178	Ramipril	DDI type 15	Folic acid may decrease the excretion rate of Ramipril which could result in a higher serum level.	0.999834	2	FALSE	FALSE
DB00158	Folic acid	DB00181	Baclofen	DDI type 15	Folic acid may decrease the excretion rate of Baclofen which could result in a higher serum level.	0.999641	4	TRUE	FALSE
DB00158	Folic acid	DB00186	Lorazepam	DDI type 15	Folic acid may decrease the excretion rate of Lorazepam which could result in a higher serum level.	0.999915	0	TRUE	FALSE
DB00158	Folic acid	DB00190	Carbidopa	DDI type 15	Folic acid may decrease the excretion rate of Carbidopa which could result in a higher serum level.	0.999903	0	TRUE	FALSE
DB00158	Folic acid	DB00193	Tramadol	DDI type 15	Folic acid may decrease the excretion rate of Tramadol which could result in a higher serum level.	0.999977	1	TRUE	FALSE
DB00158	Folic acid	DB00196	Fluconazole	DDI type 15	Folic acid may decrease the excretion rate of Fluconazole which could result in a higher serum level.	0.997199	0	TRUE	FALSE
DB00158	Folic acid	DB00209	Trospium	DDI type 15	Folic acid may decrease the excretion rate of Trospium which could result in a higher serum level.	0.997648	1	FALSE	FALSE
DB00158	Folic acid	DB00213	Pantoprazole	DDI type 15	Folic acid may decrease the excretion rate of Pantoprazole which could result in a higher serum level.	0.999741	12	FALSE	FALSE
DB00158	Folic acid	DB00214	Torasemide	DDI type 15	Folic acid may decrease the excretion rate of Torasemide which could result in a higher serum level.	0.989231	0	FALSE	FALSE
DB00158	Folic acid	DB00215	Citalopram	DDI type 15	Folic acid may decrease the excretion rate of Citalopram which could result in a higher serum level.	0.994127	2	FALSE	FALSE
DB00158	Folic acid	DB00222	Glimepiride	DDI type 15	Folic acid may decrease the excretion rate of Glimepiride which could result in a higher serum level.	0.999815	0	FALSE	FALSE
DB00158	Folic acid	DB00227	Lovastatin	DDI type 15	Folic acid may decrease the excretion rate of Lovastatin which could result in a higher serum level.	0.988453	0	FALSE	FALSE
DB00158	Folic acid	DB00230	Pregabalin	DDI type 15	Folic acid may decrease the excretion rate of Pregabalin which could result in a higher serum level.	0.995416	3	TRUE	FALSE
DB00158	Folic acid	DB00242	Cladribine	DDI type 26	The risk or severity of adverse effects can be increased when Folic acid is combined with Cladribine.	0.999747	0	FALSE	TRUE
DB00158	Folic acid	DB00242	Cladribine	DDI type 15	Folic acid may decrease the excretion rate of Cladribine which could result in a higher serum level.	0.998879	0	FALSE	FALSE
DB00158	Folic acid	DB00243	Ranolazine	DDI type 15	Folic acid may decrease the excretion rate of Ranolazine which could result in a higher serum level.	0.999963	0	TRUE	FALSE
DB00158	Folic acid	DB00244	Mesalazine	DDI type 15	Folic acid may decrease the excretion rate of Mesalazine which could result in a higher serum level.	0.942056	0	FALSE	FALSE
DB00158	Folic acid	DB00254	Doxycycline	DDI type 15	Folic acid may decrease the excretion rate of Doxycycline which could result in a higher serum level.	0.999292	0	TRUE	FALSE
DB00158	Folic acid	DB00264	Metoprolol	DDI type 15	Folic acid may decrease the excretion rate of Metoprolol which could result in a higher serum level.	0.999978	4	TRUE	FALSE
DB00158	Folic acid	DB00273	Topiramate	DDI type 15	Folic acid may decrease the excretion rate of Topiramate which could result in a higher serum level.	0.988251	0	TRUE	FALSE
DB00158	Folic acid	DB00279	Liothyronine	DDI type 15	Folic acid may decrease the excretion rate of Liothyronine which could result in a higher serum level.	0.988814	0	TRUE	FALSE
DB00158	Folic acid	DB00281	Lidocaine	DDI type 15	Folic acid may decrease the excretion rate of Lidocaine which could result in a higher serum level.	0.99998	0	FALSE	FALSE
DB00158	Folic acid	DB00285	Venlafaxine	DDI type 15	Folic acid may decrease the excretion rate of Venlafaxine which could result in a higher serum level.	0.999972	0	FALSE	FALSE
DB00158	Folic acid	DB00294	Etonogestrel	DDI type 15	Folic acid may decrease the excretion rate of Etonogestrel which could result in a higher serum level.	0.999424	0	TRUE	FALSE
DB00158	Folic acid	DB00295	Morphine	DDI type 15	Folic acid may decrease the excretion rate of Morphine which could result in a higher serum level.	0.997166	0	FALSE	FALSE
DB00158	Folic acid	DB00304	Desogestrel	DDI type 15	Folic acid may decrease the excretion rate of Desogestrel which could result in a higher serum level.	0.998429	0	FALSE	FALSE
DB00158	Folic acid	DB00315	Zolmitriptan	DDI type 15	Folic acid may decrease the excretion rate of Zolmitriptan which could result in a higher serum level.	0.999794	1	FALSE	FALSE
DB00158	Folic acid	DB00316	Acetaminophen	DDI type 15	Folic acid may decrease the excretion rate of Acetaminophen which could result in a higher serum level.	0.999704	1	TRUE	FALSE
DB00158	Folic acid	DB00318	Codeine	DDI type 15	Folic acid may decrease the excretion rate of Codeine which could result in a higher serum level.	0.997935	0	FALSE	FALSE
DB00158	Folic acid	DB00321	Amitriptyline	DDI type 15	Folic acid may decrease the excretion rate of Amitriptyline which could result in a higher serum level.	0.999953	0	TRUE	FALSE
DB00158	Folic acid	DB00327	Hydromorphone	DDI type 15	Folic acid may decrease the excretion rate of Hydromorphone which could result in a higher serum level.	0.999871	0	TRUE	FALSE
DB00158	Folic acid	DB00331	Metformin	DDI type 15	Folic acid may decrease the excretion rate of Metformin which could result in a higher serum level.	0.999945	0	TRUE	FALSE
DB00158	Folic acid	DB00332	Ipratropium	DDI type 15	Folic acid may decrease the excretion rate of Ipratropium which could result in a higher serum level.	0.999796	0	FALSE	FALSE
DB00158	Folic acid	DB00341	Cetirizine	DDI type 15	Folic acid may decrease the excretion rate of Cetirizine which could result in a higher serum level.	0.999922	0	TRUE	FALSE
DB00158	Folic acid	DB00363	Clozapine	DDI type 15	Folic acid may decrease the excretion rate of Clozapine which could result in a higher serum level.	0.999193	0	TRUE	FALSE
DB00158	Folic acid	DB00367	Levonorgestrel	DDI type 15	Folic acid may decrease the excretion rate of Levonorgestrel which could result in a higher serum level.	0.999915	2	FALSE	FALSE
DB00158	Folic acid	DB00373	Timolol	DDI type 15	Folic acid may decrease the excretion rate of Timolol which could result in a higher serum level.	0.99991	0	TRUE	FALSE
DB00158	Folic acid	DB00378	Dydrogesterone	DDI type 15	Folic acid may decrease the excretion rate of Dydrogesterone which could result in a higher serum level.	0.999901	0	FALSE	FALSE
DB00158	Folic acid	DB00381	Amlodipine	DDI type 15	Folic acid may decrease the excretion rate of Amlodipine which could result in a higher serum level.	0.999438	2	FALSE	FALSE
DB00158	Folic acid	DB00391	Sulpiride	DDI type 15	Folic acid may decrease the excretion rate of Sulpiride which could result in a higher serum level.	0.950747	0	FALSE	FALSE
DB00158	Folic acid	DB00396	Progesterone	DDI type 15	Folic acid may decrease the excretion rate of Progesterone which could result in a higher serum level.	0.999532	0	FALSE	FALSE
DB00158	Folic acid	DB00399	Zoledronic acid	DDI type 63	Folic acid may increase the hypocalcemic activities of Zoledronic acid.	0.997172	0	FALSE	FALSE
DB00158	Folic acid	DB00401	Nisoldipine	DDI type 15	Folic acid may decrease the excretion rate of Nisoldipine which could result in a higher serum level.	0.999886	0	TRUE	FALSE
DB00158	Folic acid	DB00413	Pramipexole	DDI type 15	Folic acid may decrease the excretion rate of Pramipexole which could result in a higher serum level.	0.999837	1	TRUE	FALSE
DB00158	Folic acid	DB00421	Spironolactone	DDI type 15	Folic acid may decrease the excretion rate of Spironolactone which could result in a higher serum level.	0.999536	0	FALSE	FALSE
DB00158	Folic acid	DB00425	Zolpidem	DDI type 7	The metabolism of Zolpidem can be increased when combined with Folic acid.	0.982845	0	FALSE	FALSE
DB00158	Folic acid	DB00425	Zolpidem	DDI type 6	The metabolism of Zolpidem can be decreased when combined with Folic acid.	0.958151	0	FALSE	FALSE
DB00158	Folic acid	DB00437	Allopurinol	DDI type 15	Folic acid may decrease the excretion rate of Allopurinol which could result in a higher serum level.	0.999924	1	TRUE	FALSE
DB00158	Folic acid	DB00440	Trimethoprim	DDI type 13	The therapeutic efficacy of Trimethoprim can be decreased when used in combination with Folic acid.	0.999747	0	FALSE	FALSE
DB00158	Folic acid	DB00440	Trimethoprim	DDI type 15	Folic acid may decrease the excretion rate of Trimethoprim which could result in a higher serum level.	0.99701	0	TRUE	FALSE
DB00158	Folic acid	DB00451	Levothyroxine	DDI type 15	Folic acid may decrease the excretion rate of Levothyroxine which could result in a higher serum level.	0.957654	8	FALSE	FALSE
DB00158	Folic acid	DB00455	Loratadine	DDI type 15	Folic acid may decrease the excretion rate of Loratadine which could result in a higher serum level.	0.999963	1	FALSE	FALSE
DB00158	Folic acid	DB00468	Quinine	DDI type 15	Folic acid may decrease the excretion rate of Quinine which could result in a higher serum level.	0.999927	0	FALSE	FALSE
DB00158	Folic acid	DB00472	Fluoxetine	DDI type 15	Folic acid may decrease the excretion rate of Fluoxetine which could result in a higher serum level.	0.97366	0	FALSE	FALSE
DB00158	Folic acid	DB00476	Duloxetine	DDI type 15	Folic acid may decrease the excretion rate of Duloxetine which could result in a higher serum level.	0.999967	0	TRUE	FALSE
DB00158	Folic acid	DB00496	Darifenacin	DDI type 15	Folic acid may decrease the excretion rate of Darifenacin which could result in a higher serum level.	0.954959	0	FALSE	FALSE
DB00158	Folic acid	DB00497	Oxycodone	DDI type 15	Folic acid may decrease the excretion rate of Oxycodone which could result in a higher serum level.	0.994647	0	FALSE	FALSE
DB00158	Folic acid	DB00528	Lercanidipine	DDI type 15	Folic acid may decrease the excretion rate of Lercanidipine which could result in a higher serum level.	0.999858	0	FALSE	FALSE
DB00158	Folic acid	DB00529	Foscarnet	DDI type 15	Folic acid may decrease the excretion rate of Foscarnet which could result in a higher serum level.	0.99815	0	FALSE	FALSE
DB00158	Folic acid	DB00537	Ciprofloxacin	DDI type 15	Folic acid may decrease the excretion rate of Ciprofloxacin which could result in a higher serum level.	0.999952	0	TRUE	FALSE
DB00158	Folic acid	DB00555	Lamotrigine	DDI type 15	Folic acid may decrease the excretion rate of Lamotrigine which could result in a higher serum level.	0.99937	0	TRUE	FALSE
DB00158	Folic acid	DB00563	Methotrexate	DDI type 13	The therapeutic efficacy of Methotrexate can be decreased when used in combination with Folic acid.	0.999857	1	TRUE	FALSE
DB00158	Folic acid	DB00564	Carbamazepine	DDI type 9	The serum concentration of Carbamazepine can be decreased when it is combined with Folic acid.	0.994699	0	FALSE	FALSE
DB00158	Folic acid	DB00571	Propranolol	DDI type 15	Folic acid may decrease the excretion rate of Propranolol which could result in a higher serum level.	0.999896	1	TRUE	FALSE
DB00158	Folic acid	DB00581	Lactulose	DDI type 13	The therapeutic efficacy of Lactulose can be decreased when used in combination with Folic acid.	0.99627	0	FALSE	FALSE
DB00158	Folic acid	DB00583	Levocarnitine	DDI type 15	Folic acid may decrease the excretion rate of Levocarnitine which could result in a higher serum level.	0.997678	0	FALSE	FALSE
DB00158	Folic acid	DB00584	Enalapril	DDI type 15	Folic acid may decrease the excretion rate of Enalapril which could result in a higher serum level.	0.999742	0	FALSE	FALSE
DB00158	Folic acid	DB00590	Doxazosin	DDI type 15	Folic acid may decrease the excretion rate of Doxazosin which could result in a higher serum level.	0.999683	0	FALSE	FALSE
DB00158	Folic acid	DB00594	Amiloride	DDI type 15	Folic acid may decrease the excretion rate of Amiloride which could result in a higher serum level.	0.997988	0	FALSE	FALSE
DB00158	Folic acid	DB00603	Medroxyprogesterone acetate	DDI type 15	Folic acid may decrease the excretion rate of Medroxyprogesterone acetate which could result in a higher serum level.	0.999615	0	TRUE	FALSE
DB00158	Folic acid	DB00612	Bisoprolol	DDI type 15	Folic acid may decrease the excretion rate of Bisoprolol which could result in a higher serum level.	0.999921	3	TRUE	FALSE
DB00158	Folic acid	DB00630	Alendronic acid	DDI type 63	Folic acid may increase the hypocalcemic activities of Alendronic acid.	0.983089	0	FALSE	FALSE
DB00158	Folic acid	DB00635	Prednisone	DDI type 26	The risk or severity of adverse effects can be increased when Folic acid is combined with Prednisone.	0.980603	0	FALSE	TRUE		Beclomethasone dipropionate (DB00394; P04150), Betamethasone (DB00443; P04150), Fluticasone propionate (DB00588; P04150), Hydrocortamate (DB00769; P04150), Prednicarbate (DB01130; P04150), Dexamethasone (DB01234; P04150), Difluprednate (DB06781; P04150), Dexamethasone acetate (DB14649; P04150)
DB00158	Folic acid	DB00635	Prednisone	DDI type 15	Folic acid may decrease the excretion rate of Prednisone which could result in a higher serum level.	0.987512	0	TRUE	FALSE
DB00158	Folic acid	DB00641	Simvastatin	DDI type 15	Folic acid may decrease the excretion rate of Simvastatin which could result in a higher serum level.	0.984742	3	FALSE	FALSE
DB00158	Folic acid	DB00654	Latanoprost	DDI type 15	Folic acid may decrease the excretion rate of Latanoprost which could result in a higher serum level.	0.997235	0	FALSE	FALSE
DB00158	Folic acid	DB00656	Trazodone	DDI type 15	Folic acid may decrease the excretion rate of Trazodone which could result in a higher serum level.	0.999594	0	FALSE	FALSE
DB00158	Folic acid	DB00669	Sumatriptan	DDI type 15	Folic acid may decrease the excretion rate of Sumatriptan which could result in a higher serum level.	0.999945	0	TRUE	FALSE
DB00158	Folic acid	DB00678	Losartan	DDI type 15	Folic acid may decrease the excretion rate of Losartan which could result in a higher serum level.	0.999896	0	FALSE	FALSE
DB00158	Folic acid	DB00687	Fludrocortisone	DDI type 26	The risk or severity of adverse effects can be increased when Folic acid is combined with Fludrocortisone.	0.999612	0	FALSE	TRUE
DB00158	Folic acid	DB00687	Fludrocortisone	DDI type 15	Folic acid may decrease the excretion rate of Fludrocortisone which could result in a higher serum level.	0.958749	0	FALSE	FALSE
DB00158	Folic acid	DB00697	Tizanidine	DDI type 15	Folic acid may decrease the excretion rate of Tizanidine which could result in a higher serum level.	0.993683	0	FALSE	FALSE
DB00158	Folic acid	DB00698	Nitrofurantoin	DDI type 15	Folic acid may decrease the excretion rate of Nitrofurantoin which could result in a higher serum level.	0.999916	0	TRUE	FALSE
DB00158	Folic acid	DB00706	Tamsulosin	DDI type 15	Folic acid may decrease the excretion rate of Tamsulosin which could result in a higher serum level.	0.997506	0	TRUE	FALSE
DB00158	Folic acid	DB00710	Ibandronate	DDI type 63	Folic acid may increase the hypocalcemic activities of Ibandronate.	0.998131	0	FALSE	FALSE
DB00158	Folic acid	DB00717	Norethisterone	DDI type 15	Folic acid may decrease the excretion rate of Norethisterone which could result in a higher serum level.	0.999747	0	FALSE	FALSE
DB00158	Folic acid	DB00722	Lisinopril	DDI type 15	Folic acid may decrease the excretion rate of Lisinopril which could result in a higher serum level.	0.999941	0	TRUE	FALSE
DB00158	Folic acid	DB00726	Trimipramine	DDI type 15	Folic acid may decrease the excretion rate of Trimipramine which could result in a higher serum level.	0.999702	0	FALSE	FALSE
DB00158	Folic acid	DB00727	Nitroglycerin	DDI type 15	Folic acid may decrease the excretion rate of Nitroglycerin which could result in a higher serum level.	0.997663	0	FALSE	FALSE
DB00158	Folic acid	DB00741	Hydrocortisone	DDI type 26	The risk or severity of adverse effects can be increased when Folic acid is combined with Hydrocortisone.	0.999071	0	FALSE	TRUE
DB00158	Folic acid	DB00763	Methimazole	DDI type 15	Folic acid may decrease the excretion rate of Methimazole which could result in a higher serum level.	0.999545	0	TRUE	FALSE
DB00158	Folic acid	DB00764	Mometasone	DDI type 26	The risk or severity of adverse effects can be increased when Folic acid is combined with Mometasone.	0.999847	0	FALSE	TRUE
DB00158	Folic acid	DB00776	Oxcarbazepine	DDI type 9	The serum concentration of Oxcarbazepine can be decreased when it is combined with Folic acid.	0.99981	0	FALSE	FALSE
DB00158	Folic acid	DB00783	Estradiol	DDI type 15	Folic acid may decrease the excretion rate of Estradiol which could result in a higher serum level.	0.999692	0	FALSE	FALSE
DB00158	Folic acid	DB00790	Perindopril	DDI type 15	Folic acid may decrease the excretion rate of Perindopril which could result in a higher serum level.	0.999982	0	TRUE	FALSE
DB00158	Folic acid	DB00794	Primidone	DDI type 9	The serum concentration of Primidone can be decreased when it is combined with Folic acid.	0.998133	0	TRUE	FALSE
DB00158	Folic acid	DB00808	Indapamide	DDI type 15	Folic acid may decrease the excretion rate of Indapamide which could result in a higher serum level.	0.999812	0	FALSE	FALSE
DB00158	Folic acid	DB00813	Fentanyl	DDI type 15	Folic acid may decrease the excretion rate of Fentanyl which could result in a higher serum level.	0.998105	0	TRUE	FALSE
DB00158	Folic acid	DB00820	Tadalafil	DDI type 15	Folic acid may decrease the excretion rate of Tadalafil which could result in a higher serum level.	0.999966	0	TRUE	FALSE
DB00158	Folic acid	DB00829	Diazepam	DDI type 15	Folic acid may decrease the excretion rate of Diazepam which could result in a higher serum level.	0.999918	0	TRUE	FALSE
DB00158	Folic acid	DB00860	Prednisolone	DDI type 26	The risk or severity of adverse effects can be increased when Folic acid is combined with Prednisolone.	0.997309	0	FALSE	TRUE		Beclomethasone dipropionate (DB00394; P04150), Betamethasone (DB00443; P04150), Fluticasone propionate (DB00588; P04150), Hydrocortamate (DB00769; P04150), Prednicarbate (DB01130; P04150), Dexamethasone (DB01234; P04150), Difluprednate (DB06781; P04150), Dexamethasone acetate (DB14649; P04150)
DB00158	Folic acid	DB00863	Ranitidine	DDI type 15	Folic acid may decrease the excretion rate of Ranitidine which could result in a higher serum level.	0.99999	0	TRUE	FALSE
DB00158	Folic acid	DB00869	Dorzolamide	DDI type 15	Folic acid may decrease the excretion rate of Dorzolamide which could result in a higher serum level.	0.979504	0	FALSE	FALSE
DB00158	Folic acid	DB00876	Eprosartan	DDI type 13	The therapeutic efficacy of Eprosartan can be decreased when used in combination with Folic acid.	0.995039	0	FALSE	FALSE
DB00158	Folic acid	DB00876	Eprosartan	DDI type 15	Folic acid may decrease the excretion rate of Eprosartan which could result in a higher serum level.	0.999092	0	FALSE	FALSE
DB00158	Folic acid	DB00884	Risedronic acid	DDI type 63	Folic acid may increase the hypocalcemic activities of Risedronic acid.	0.980229	0	FALSE	FALSE
DB00158	Folic acid	DB00904	Ondansetron	DDI type 15	Folic acid may decrease the excretion rate of Ondansetron which could result in a higher serum level.	0.979121	0	FALSE	FALSE
DB00158	Folic acid	DB00905	Bimatoprost	DDI type 15	Folic acid may decrease the excretion rate of Bimatoprost which could result in a higher serum level.	0.999637	0	FALSE	FALSE
DB00158	Folic acid	DB00915	Amantadine	DDI type 15	Folic acid may decrease the excretion rate of Amantadine which could result in a higher serum level.	0.999962	0	TRUE	FALSE
DB00158	Folic acid	DB00925	Phenoxybenzamine	DDI type 15	Folic acid may decrease the excretion rate of Phenoxybenzamine which could result in a higher serum level.	0.999869	0	FALSE	FALSE
DB00158	Folic acid	DB00938	Salmeterol	DDI type 15	Folic acid may decrease the excretion rate of Salmeterol which could result in a higher serum level.	0.999813	0	FALSE	FALSE
DB00158	Folic acid	DB00950	Fexofenadine	DDI type 15	Folic acid may decrease the excretion rate of Fexofenadine which could result in a higher serum level.	0.988921	0	FALSE	FALSE
DB00158	Folic acid	DB00951	Isoniazid	DDI type 15	Folic acid may decrease the excretion rate of Isoniazid which could result in a higher serum level.	0.999946	0	TRUE	FALSE
DB00158	Folic acid	DB00952	Naratriptan	DDI type 15	Folic acid may decrease the excretion rate of Naratriptan which could result in a higher serum level.	0.999895	0	FALSE	FALSE
DB00158	Folic acid	DB00953	Rizatriptan	DDI type 15	Folic acid may decrease the excretion rate of Rizatriptan which could result in a higher serum level.	0.999945	0	TRUE	FALSE
DB00158	Folic acid	DB00957	Norgestimate	DDI type 15	Folic acid may decrease the excretion rate of Norgestimate which could result in a higher serum level.	0.995063	0	FALSE	FALSE
DB00158	Folic acid	DB00959	Methylprednisolone	DDI type 26	The risk or severity of adverse effects can be increased when Folic acid is combined with Methylprednisolone.	0.973352	5	FALSE	TRUE		Beclomethasone dipropionate (DB00394; P04150), Betamethasone (DB00443; P04150), Fluticasone propionate (DB00588; P04150), Hydrocortamate (DB00769; P04150), Prednicarbate (DB01130; P04150), Dexamethasone (DB01234; P04150), Difluprednate (DB06781; P04150), Dexamethasone acetate (DB14649; P04150)
DB00158	Folic acid	DB00959	Methylprednisolone	DDI type 15	Folic acid may decrease the excretion rate of Methylprednisolone which could result in a higher serum level.	0.973115	5	FALSE	FALSE
DB00158	Folic acid	DB00966	Telmisartan	DDI type 15	Folic acid may decrease the excretion rate of Telmisartan which could result in a higher serum level.	0.99939	0	FALSE	FALSE
DB00158	Folic acid	DB00967	Desloratadine	DDI type 15	Folic acid may decrease the excretion rate of Desloratadine which could result in a higher serum level.	0.99969	0	FALSE	FALSE
DB00158	Folic acid	DB00973	Ezetimibe	DDI type 15	Folic acid may decrease the excretion rate of Ezetimibe which could result in a higher serum level.	0.999938	0	FALSE	FALSE
DB00158	Folic acid	DB00977	Ethinylestradiol	DDI type 15	Folic acid may decrease the excretion rate of Ethinylestradiol which could result in a higher serum level.	0.999819	1	FALSE	FALSE
DB00158	Folic acid	DB00979	Cyclopentolate	DDI type 15	Folic acid may decrease the excretion rate of Cyclopentolate which could result in a higher serum level.	0.99998	0	FALSE	FALSE
DB00158	Folic acid	DB00983	Formoterol	DDI type 15	Folic acid may decrease the excretion rate of Formoterol which could result in a higher serum level.	0.999736	1	FALSE	FALSE
DB00158	Folic acid	DB00989	Rivastigmine	DDI type 15	Folic acid may decrease the excretion rate of Rivastigmine which could result in a higher serum level.	0.999994	0	FALSE	FALSE
DB00158	Folic acid	DB00993	Azathioprine	DDI type 15	Folic acid may decrease the excretion rate of Azathioprine which could result in a higher serum level.	0.984602	0	TRUE	FALSE
DB00158	Folic acid	DB00996	Gabapentin	DDI type 13	The therapeutic efficacy of Gabapentin can be decreased when used in combination with Folic acid.	0.94502	0	FALSE	FALSE
DB00158	Folic acid	DB00996	Gabapentin	DDI type 15	Folic acid may decrease the excretion rate of Gabapentin which could result in a higher serum level.	0.999683	0	FALSE	FALSE
DB00158	Folic acid	DB01001	Salbutamol	DDI type 15	Folic acid may decrease the excretion rate of Salbutamol which could result in a higher serum level.	0.999685	0	TRUE	FALSE
DB00158	Folic acid	DB01015	Sulfamethoxazole	DDI type 13	The therapeutic efficacy of Sulfamethoxazole can be decreased when used in combination with Folic acid.	0.996013	0	FALSE	FALSE
DB00158	Folic acid	DB01015	Sulfamethoxazole	DDI type 15	Folic acid may decrease the excretion rate of Sulfamethoxazole which could result in a higher serum level.	0.996487	0	TRUE	FALSE
DB00158	Folic acid	DB01019	Bethanechol	DDI type 15	Folic acid may decrease the excretion rate of Bethanechol which could result in a higher serum level.	0.998475	0	FALSE	FALSE
DB00158	Folic acid	DB01029	Irbesartan	DDI type 15	Folic acid may decrease the excretion rate of Irbesartan which could result in a higher serum level.	0.999607	1	FALSE	FALSE
DB00158	Folic acid	DB01036	Tolterodine	DDI type 15	Folic acid may decrease the excretion rate of Tolterodine which could result in a higher serum level.	0.999778	1	TRUE	FALSE
DB00158	Folic acid	DB01039	Fenofibrate	DDI type 15	Folic acid may decrease the excretion rate of Fenofibrate which could result in a higher serum level.	0.999209	0	TRUE	FALSE
DB00158	Folic acid	DB01043	Memantine	DDI type 15	Folic acid may decrease the excretion rate of Memantine which could result in a higher serum level.	0.999988	0	TRUE	FALSE
DB00158	Folic acid	DB01050	Ibuprofen	DDI type 15	Folic acid may decrease the excretion rate of Ibuprofen which could result in a higher serum level.	0.996051	4	FALSE	FALSE
DB00158	Folic acid	DB01062	Oxybutynin	DDI type 15	Folic acid may decrease the excretion rate of Oxybutynin which could result in a higher serum level.	0.999909	0	FALSE	FALSE
DB00158	Folic acid	DB01068	Clonazepam	DDI type 15	Folic acid may decrease the excretion rate of Clonazepam which could result in a higher serum level.	0.999919	0	TRUE	FALSE
DB00158	Folic acid	DB01070	Dihydrotachysterol	DDI type 6	The metabolism of Dihydrotachysterol can be decreased when combined with Folic acid.	0.986555	0	FALSE	FALSE
DB00158	Folic acid	DB01075	Diphenhydramine	DDI type 15	Folic acid may decrease the excretion rate of Diphenhydramine which could result in a higher serum level.	0.999956	0	FALSE	FALSE
DB00158	Folic acid	DB01076	Atorvastatin	DDI type 15	Folic acid may decrease the excretion rate of Atorvastatin which could result in a higher serum level.	0.998844	1	FALSE	FALSE
DB00158	Folic acid	DB01086	Benzocaine	DDI type 13	The therapeutic efficacy of Benzocaine can be decreased when used in combination with Folic acid.	0.997165	0	FALSE	FALSE
DB00158	Folic acid	DB01086	Benzocaine	DDI type 6	The metabolism of Benzocaine can be decreased when combined with Folic acid.	0.999626	0	FALSE	FALSE
DB00158	Folic acid	DB01097	Leflunomide	DDI type 26	The risk or severity of adverse effects can be increased when Folic acid is combined with Leflunomide.	0.999508	0	FALSE	TRUE
DB00158	Folic acid	DB01097	Leflunomide	DDI type 15	Folic acid may decrease the excretion rate of Leflunomide which could result in a higher serum level.	0.997471	0	FALSE	FALSE
DB00158	Folic acid	DB01098	Rosuvastatin	DDI type 15	Folic acid may decrease the excretion rate of Rosuvastatin which could result in a higher serum level.	0.995479	0	FALSE	FALSE
DB00158	Folic acid	DB01110	Miconazole	DDI type 1	Folic acid can cause a decrease in the absorption of Miconazole resulting in a reduced serum concentration and potentially a decrease in efficacy.	0.970879	0	FALSE	FALSE
DB00158	Folic acid	DB01112	Cefuroxime	DDI type 15	Folic acid may decrease the excretion rate of Cefuroxime which could result in a higher serum level.	0.965407	0	FALSE	FALSE
DB00158	Folic acid	DB01114	Chlorpheniramine	DDI type 15	Folic acid may decrease the excretion rate of Chlorpheniramine which could result in a higher serum level.	0.999878	0	FALSE	FALSE
DB00158	Folic acid	DB01137	Levofloxacin	DDI type 15	Folic acid may decrease the excretion rate of Levofloxacin which could result in a higher serum level.	0.999969	0	TRUE	FALSE
DB00158	Folic acid	DB01142	Doxepin	DDI type 15	Folic acid may decrease the excretion rate of Doxepin which could result in a higher serum level.	0.999975	0	TRUE	FALSE
DB00158	Folic acid	DB01156	Bupropion	DDI type 15	Folic acid may decrease the excretion rate of Bupropion which could result in a higher serum level.	0.999928	0	TRUE	FALSE
DB00158	Folic acid	DB01162	Terazosin	DDI type 13	The therapeutic efficacy of Terazosin can be decreased when used in combination with Folic acid.	0.999211	0	FALSE	FALSE
DB00158	Folic acid	DB01162	Terazosin	DDI type 15	Folic acid may decrease the excretion rate of Terazosin which could result in a higher serum level.	0.999678	0	FALSE	FALSE
DB00158	Folic acid	DB01175	Escitalopram	DDI type 15	Folic acid may decrease the excretion rate of Escitalopram which could result in a higher serum level.	0.994127	2	FALSE	FALSE
DB00158	Folic acid	DB01183	Naloxone	DDI type 15	Folic acid may decrease the excretion rate of Naloxone which could result in a higher serum level.	0.999959	0	TRUE	FALSE
DB00158	Folic acid	DB01194	Brinzolamide	DDI type 15	Folic acid may decrease the excretion rate of Brinzolamide which could result in a higher serum level.	0.998599	0	FALSE	FALSE
DB00158	Folic acid	DB01195	Flecainide	DDI type 15	Folic acid may decrease the excretion rate of Flecainide which could result in a higher serum level.	0.99979	0	FALSE	FALSE
DB00158	Folic acid	DB01197	Captopril	DDI type 15	Folic acid may decrease the excretion rate of Captopril which could result in a higher serum level.	0.999881	0	FALSE	FALSE
DB00158	Folic acid	DB01198	Zopiclone	DDI type 15	Folic acid may decrease the excretion rate of Zopiclone which could result in a higher serum level.	0.999666	3	FALSE	FALSE
DB00158	Folic acid	DB01202	Levetiracetam	DDI type 15	Folic acid may decrease the excretion rate of Levetiracetam which could result in a higher serum level.	0.979975	0	FALSE	FALSE
DB00158	Folic acid	DB01204	Mitoxantrone	DDI type 26	The risk or severity of adverse effects can be increased when Folic acid is combined with Mitoxantrone.	0.99369	1	FALSE	TRUE		Valrubicin (DB00385; DNA|P11388)
DB00158	Folic acid	DB01204	Mitoxantrone	DDI type 15	Folic acid may decrease the excretion rate of Mitoxantrone which could result in a higher serum level.	0.999481	1	FALSE	FALSE
DB00158	Folic acid	DB01216	Finasteride	DDI type 15	Folic acid may decrease the excretion rate of Finasteride which could result in a higher serum level.	0.998742	0	FALSE	FALSE
DB00158	Folic acid	DB01224	Quetiapine	DDI type 15	Folic acid may decrease the excretion rate of Quetiapine which could result in a higher serum level.	0.999924	0	TRUE	FALSE
DB00158	Folic acid	DB01233	Metoclopramide	DDI type 15	Folic acid may decrease the excretion rate of Metoclopramide which could result in a higher serum level.	0.999984	0	TRUE	FALSE
DB00158	Folic acid	DB01235	Levodopa	DDI type 15	Folic acid may decrease the excretion rate of Levodopa which could result in a higher serum level.	0.982117	0	FALSE	FALSE
DB00158	Folic acid	DB01261	Sitagliptin	DDI type 15	Folic acid may decrease the excretion rate of Sitagliptin which could result in a higher serum level.	0.999789	0	TRUE	FALSE
DB00158	Folic acid	DB01288	Fenoterol	DDI type 15	Folic acid may decrease the excretion rate of Fenoterol which could result in a higher serum level.	0.999635	0	FALSE	FALSE
DB00158	Folic acid	DB01373	Calcium	DDI type 15	Folic acid may decrease the excretion rate of Calcium which could result in a higher serum level.	0.99607	0	FALSE	FALSE
DB00158	Folic acid	DB01390	Sodium bicarbonate	DDI type 15	Folic acid may decrease the excretion rate of Sodium bicarbonate which could result in a higher serum level.	0.999938	1	FALSE	FALSE
DB00158	Folic acid	DB01395	Drospirenone	DDI type 15	Folic acid may decrease the excretion rate of Drospirenone which could result in a higher serum level.	0.98703	0	FALSE	FALSE
DB00158	Folic acid	DB01409	Tiotropium	DDI type 15	Folic acid may decrease the excretion rate of Tiotropium which could result in a higher serum level.	0.999983	0	TRUE	FALSE
DB00158	Folic acid	DB01422	Nitroxoline	DDI type 15	Folic acid may decrease the excretion rate of Nitroxoline which could result in a higher serum level.	0.999858	0	FALSE	FALSE
DB00158	Folic acid	DB01586	Ursodeoxycholic acid	DDI type 15	Folic acid may decrease the excretion rate of Ursodeoxycholic acid which could result in a higher serum level.	0.999681	0	FALSE	FALSE
DB00158	Folic acid	DB01591	Solifenacin	DDI type 15	Folic acid may decrease the excretion rate of Solifenacin which could result in a higher serum level.	0.994103	2	FALSE	FALSE
DB00158	Folic acid	DB01592	Iron	DDI type 15	Folic acid may decrease the excretion rate of Iron which could result in a higher serum level.	0.995764	1	FALSE	FALSE
DB00158	Folic acid	DB01593	Zinc	DDI type 15	Folic acid may decrease the excretion rate of Zinc which could result in a higher serum level.	0.995764	2	FALSE	FALSE
[truncated: 66,209 more rows]

## Sheet: Legend
DDIs determined with DeepDDI between drug compounds taken by the patients with MS as well as DMDs and BTKis.
BTKi = Bruton's tyrosine kinase inhibitor currently under investigation in MS
DDI = drug-drug interaction
DMD = disease-modifying drug approved for the treatment of MS
DNN = deep neural network
MS = multiple sclerosis
1 output neuron activation level
2 number of subjects in the patient cohort (N=627) who were using medications that contained the two drug compounds as active ingredients
3 for drug pairs with DDI types indicating negative health effects, alternative drugs are listed that also elicit the intended pharmacological action but were not predicted to have such negative health effects (i.e., output neurons' activation level in the DNN <0.47); format: generic drug name (DrugBank accession; UniProtKB accessions for common targets or a member of a protein family targeted by…
