# Supplementary material for: Update and Application of a Deep Learning Model for the Prediction of Interactions between Drugs Used by Patients with Multiple Sclerosis
Source: Pharmaceutics. 2023 Dec 19;16(1):3. doi: 10.3390/pharmaceutics16010003 (PMC10819178; doi:10.3390/pharmaceutics16010003)
Supplement: Supplementary file 1 [file pharmaceutics-16-00003-s001.zip › Supplemental_Table_S4.xlsx]

## Sheet: Supplemental Table 4
Drug DrugBank accession	Drug generic name	Food compound FoodDB accession	Food compound name	DFI type 1	Sentence	Score 2	Food compound is subject 3	Negative health effect	Food sources 4
DB00014	Goserelin	FDB000435	N-Methyltyramine	DDI type 15	Goserelin may decrease the excretion rate of N-Methyltyramine which could result in a higher serum level.	0.998394	FALSE	FALSE	Barley (FOOD00088)
DB00014	Goserelin	FDB000453	Theophylline	DDI type 6	The metabolism of Theophylline can be decreased when combined with Goserelin.	0.989346	FALSE	FALSE	Cocoa bean (FOOD00182), Black tea (FOOD00907), Green tea (FOOD00908), Herbal tea (FOOD00989), Red tea (FOOD00925), Tea (FOOD00038)
DB00014	Goserelin	FDB000455	Theobromine	DDI type 6	The metabolism of Theobromine can be decreased when combined with Goserelin.	0.979994	FALSE	FALSE	Cocoa powder (FOOD00685), Chocolate (FOOD00687), Cocoa bean (FOOD00182), Coffee mocha (FOOD00743), Icing (FOOD00700), Syrup (FOOD00673), Waffle (FOOD00735), Breakfast cereal (FOOD00270), Nutritional drink (FOOD00754), Black tea (FOOD00907)
DB00014	Goserelin	FDB000474	L-Lysine	DDI type 26	The risk or severity of adverse effects can be increased when Goserelin is combined with L-Lysine.	0.997836	TRUE	TRUE	Milk (Cow) (FOOD00618), Beluga whale (FOOD00300), Red bell pepper (FOOD00880), Casein (FOOD00659), Bearded seal (FOOD00466), Gelatin (FOOD00663), Smelt (FOOD00519), Gelatin dessert (FOOD00725), Other soy product (FOOD00271), Whitefish (FOOD00503)
DB00014	Goserelin	FDB000558	Alliin	DDI type 26	The risk or severity of adverse effects can be increased when Goserelin is combined with Alliin.	0.996552	TRUE	TRUE	Soft-necked garlic (FOOD00850)
DB00014	Goserelin	FDB000842	2,4-Dihydroxybenzoic acid	DDI type 15	2,4-Dihydroxybenzoic acid may decrease the excretion rate of Goserelin which could result in a higher serum level.	0.986925	TRUE	FALSE	American cranberry (FOOD00192), Olive (FOOD00121)
DB00014	Goserelin	FDB000844	Gentisic acid	DDI type 15	Gentisic acid may decrease the excretion rate of Goserelin which could result in a higher serum level.	0.992797	TRUE	FALSE	Tarragon (FOOD00019), Common thyme (FOOD00183), Common sage (FOOD00165), Lemon balm (FOOD00108), Parsley (FOOD00131), Rosemary (FOOD00159), Horseradish (FOOD00018), Sweet basil (FOOD00119), Peanut (FOOD00016), Hyssop (FOOD00089)
DB00014	Goserelin	FDB000845	2,6-Dihydroxybenzoic acid	DDI type 15	2,6-Dihydroxybenzoic acid may decrease the excretion rate of Goserelin which could result in a higher serum level.	0.999371	TRUE	FALSE	Beer (FOOD00268), Olive (FOOD00121)
DB00014	Goserelin	FDB000846	Vanillic acid	DDI type 15	Vanillic acid may decrease the excretion rate of Goserelin which could result in a higher serum level.	0.997099	TRUE	FALSE	Coriander (FOOD00061), Garden onion (FOOD00006), Sweet basil (FOOD00119), Olive (FOOD00121), Common oregano (FOOD00124), Horseradish (FOOD00018), Peanut (FOOD00016), Cocoa powder (FOOD00685), Swiss chard (FOOD00237), Yellow wax bean (FOOD00882)
DB00014	Goserelin	FDB000848	3,5-Dihydroxybenzoic acid	DDI type 15	3,5-Dihydroxybenzoic acid may decrease the excretion rate of Goserelin which could result in a higher serum level.	0.958577	TRUE	FALSE	Beer (FOOD00268)
DB00014	Goserelin	FDB001022	Ethyl hexadecanoate	DDI type 13	The therapeutic efficacy of Ethyl hexadecanoate can be decreased when used in combination with Goserelin.	0.998049	FALSE	FALSE	Coriander (FOOD00061)
DB00014	Goserelin	FDB001176	Isodulcitol	DDI type 13	The therapeutic efficacy of Isodulcitol can be decreased when used in combination with Goserelin.	0.999775	FALSE	FALSE	Flaxseed (FOOD00101)
DB00014	Goserelin	FDB001202	D-Mannose	DDI type 13	The therapeutic efficacy of D-Mannose can be decreased when used in combination with Goserelin.	0.997709	FALSE	FALSE	Corn (FOOD00205)
DB00014	Goserelin	FDB001512	1,2-Benzenediol	DDI type 15	1,2-Benzenediol may decrease the excretion rate of Goserelin which could result in a higher serum level.	0.998335	TRUE	FALSE	Arabica coffee (FOOD00059), Coffee (FOOD00058), Robusta coffee (FOOD00060), Cocoa powder (FOOD00685), Beer (FOOD00268)
DB00014	Goserelin	FDB001532	Betulinic acid	DDI type 13	The therapeutic efficacy of Betulinic acid can be decreased when used in combination with Goserelin.	0.958331	FALSE	FALSE	Winged bean (FOOD00507), Pomegranate (FOOD00151), Java plum (FOOD00386), Common walnut (FOOD00094), Nance (FOOD00788)
DB00014	Goserelin	FDB002119	6-Propyltridecane	DDI type 13	The therapeutic efficacy of 6-Propyltridecane can be decreased when used in combination with Goserelin.	0.994438	FALSE	FALSE	Black walnut (FOOD00093)
DB00014	Goserelin	FDB002412	Tangeritin	DDI type 26	The risk or severity of adverse effects can be increased when Goserelin is combined with Tangeritin.	0.955626	TRUE	TRUE	Sweet orange (FOOD00057)
DB00014	Goserelin	FDB002943	Gamolenic acid	DDI type 6	The metabolism of Gamolenic acid can be decreased when combined with Goserelin.	0.977777	FALSE	FALSE	Borage (FOOD00026), Blackcurrant (FOOD00155), Evening primrose (FOOD00120), Carrot (FOOD00245), Wild carrot (FOOD00072), Margarine (FOOD00843), Pine nut (FOOD00138), Cake (FOOD00636), Atlantic salmon (FOOD00455), Channel catfish (FOOD00324)
DB00014	Goserelin	FDB002998	Adipostatin A	DDI type 69	Goserelin may increase the immunosuppressive activities of Adipostatin A.	0.947829	FALSE	FALSE	Rye (FOOD00169), Hard wheat (FOOD00242), Common wheat (FOOD00187), Barley (FOOD00088)
DB00014	Goserelin	FDB003337	Methyl caprylate	DDI type 10	The serum concentration of Goserelin can be increased when it is combined with Methyl caprylate.	0.943401	TRUE	FALSE	Pineapple (FOOD00012)
DB00014	Goserelin	FDB003654	Ornithine	DDI type 26	The risk or severity of adverse effects can be increased when Goserelin is combined with Ornithine.	0.996885	TRUE	TRUE	Green zucchini (FOOD00875), Potato (FOOD00175), Garden onion (FOOD00006), Broccoli (FOOD00034), Sunburst squash (pattypan squash) (FOOD00874), Spinach (FOOD00178), Cucumber (FOOD00065), Yellow bell pepper (FOOD00878), Green bell pepper (FOOD00877), Orange bell pepper (FOOD00879)
DB00014	Goserelin	FDB003685	S-Allylmercaptocysteine	DDI type 26	The risk or severity of adverse effects can be increased when Goserelin is combined with S-Allylmercaptocysteine.	0.9554	TRUE	TRUE	Soft-necked garlic (FOOD00850)
DB00014	Goserelin	FDB003693	Salicylates	DDI type 15	Salicylates may decrease the excretion rate of Goserelin which could result in a higher serum level.	0.999855	TRUE	FALSE	Common thyme (FOOD00183), Turmeric (FOOD00068), Peppermint (FOOD00113), Rosemary (FOOD00159), Mandarin orange (Clementine, Tangerine) (FOOD00056), Colorado pinyon (FOOD00433), Common walnut (FOOD00094), Pomegranate (FOOD00151)
DB00014	Goserelin	FDB003965	N-Pentyl benzene	DDI type 15	Goserelin may decrease the excretion rate of N-Pentyl benzene which could result in a higher serum level.	0.96013	FALSE	FALSE	Wild celery (FOOD00015)
DB00014	Goserelin	FDB004090	Atropine	DDI type 32	The risk or severity of QTc prolongation can be increased when Goserelin is combined with Atropine.	0.987413	TRUE	TRUE	Burdock (FOOD00017)
DB00014	Goserelin	FDB004727	N-Eicosane	DDI type 13	The therapeutic efficacy of N-Eicosane can be decreased when used in combination with Goserelin.	0.998521	FALSE	FALSE	Lemon balm (FOOD00108)
DB00014	Goserelin	FDB004728	N-Heneicosane	DDI type 13	The therapeutic efficacy of N-Heneicosane can be decreased when used in combination with Goserelin.	0.998387	FALSE	FALSE	Black elderberry (FOOD00166), Common oregano (FOOD00124), Lemon balm (FOOD00108)
DB00014	Goserelin	FDB004763	Ethyl benzene	DDI type 15	Goserelin may decrease the excretion rate of Ethyl benzene which could result in a higher serum level.	0.999402	FALSE	FALSE	Black walnut (FOOD00093), Safflower (FOOD00042)
DB00014	Goserelin	FDB005197	Ethyl pentadecanoate	DDI type 13	The therapeutic efficacy of Ethyl pentadecanoate can be decreased when used in combination with Goserelin.	0.993234	FALSE	FALSE	Coriander (FOOD00061)
DB00014	Goserelin	FDB006365	alpha,alpha-Dimethylbenzyl alcohol	DDI type 15	Goserelin may decrease the excretion rate of alpha,alpha-Dimethylbenzyl alcohol which could result in a higher serum level.	0.951213	FALSE	FALSE	Pot marjoram (FOOD00123)
DB00014	Goserelin	FDB006916	alpha-Fenchyl acetate	DDI type 26	The risk or severity of adverse effects can be increased when Goserelin is combined with alpha-Fenchyl acetate.	0.998862	TRUE	TRUE	Rosemary (FOOD00159)
DB00014	Goserelin	FDB007498	Diethylstilbesterol	DDI type 13	The therapeutic efficacy of Diethylstilbesterol can be decreased when used in combination with Goserelin.	0.959526	FALSE	FALSE	Gram bean (FOOD00199)
DB00014	Goserelin	FDB007640	6,10,14-Trimethylpentadecan-2-one	DDI type 13	The therapeutic efficacy of 6,10,14-Trimethylpentadecan-2-one can be decreased when used in combination with Goserelin.	0.990972	FALSE	FALSE	Common oregano (FOOD00124)
DB00014	Goserelin	FDB008739	Benzoic acid	DDI type 15	Benzoic acid may decrease the excretion rate of Goserelin which could result in a higher serum level.	0.99743	TRUE	FALSE	American cranberry (FOOD00192), Italian sweet red pepper (FOOD00881), Garden onion (FOOD00006), Dill (FOOD00013), Broccoli (FOOD00034), Parsnip (FOOD00129), Green zucchini (FOOD00875), Cocoa powder (FOOD00685), Milk (Cow) (FOOD00618), Cucumber (FOOD00065)
DB00014	Goserelin	FDB009029	Bornyl acetate	DDI type 26	The risk or severity of adverse effects can be increased when Goserelin is combined with Bornyl acetate.	0.998881	TRUE	TRUE	Rosemary (FOOD00159), Common sage (FOOD00165), Sweet basil (FOOD00119), Common thyme (FOOD00183), Spearmint (FOOD00112), Ginger (FOOD00206), Cumin (FOOD00067), Carrot (FOOD00245), Wild carrot (FOOD00072), Ceylon cinnamon (FOOD00051)
DB00014	Goserelin	FDB010420	Fenchyl acetate	DDI type 26	The risk or severity of adverse effects can be increased when Goserelin is combined with Fenchyl acetate.	0.998862	TRUE	TRUE	Sweet basil (FOOD00119)
DB00014	Goserelin	FDB010504	4-Hydroxybenzaldehyde	DDI type 15	4-Hydroxybenzaldehyde may decrease the excretion rate of Goserelin which could result in a higher serum level.	0.995042	TRUE	FALSE	Vinegar (FOOD00628), Oat (FOOD00022)
DB00014	Goserelin	FDB010507	3-Hydroxybenzoic acid	DDI type 15	3-Hydroxybenzoic acid may decrease the excretion rate of Goserelin which could result in a higher serum level.	0.999648	TRUE	FALSE	American cranberry (FOOD00192), Beer (FOOD00268)
DB00014	Goserelin	FDB010508	4-Hydroxybenzoic acid	DDI type 15	4-Hydroxybenzoic acid may decrease the excretion rate of Goserelin which could result in a higher serum level.	0.99854	TRUE	FALSE	Red huckleberry (FOOD00223), Rabbiteye blueberry (FOOD00898), Coriander (FOOD00061), Garden onion (FOOD00006), Loquat (FOOD00076), Highbush blueberry (FOOD00191), Olive (FOOD00121), Strawberry (FOOD00083), Swiss chard (FOOD00237), Carrot (FOOD00245)
DB00014	Goserelin	FDB010527	Zingerone	DDI type 15	Zingerone may decrease the excretion rate of Goserelin which could result in a higher serum level.	0.98277	TRUE	FALSE	Pot marjoram (FOOD00123), Ginger (FOOD00206)
DB00014	Goserelin	FDB010539	2-Vinylphenol	DDI type 15	2-Vinylphenol may decrease the excretion rate of Goserelin which could result in a higher serum level.	0.999489	TRUE	FALSE	Ceylon cinnamon (FOOD00051)
DB00014	Goserelin	FDB010560	Ethyl phenylacetate	DDI type 15	Goserelin may decrease the excretion rate of Ethyl phenylacetate which could result in a higher serum level.	0.999465	FALSE	FALSE	Corn (FOOD00205)
DB00014	Goserelin	FDB010563	1-Phenylethyl acetate	DDI type 15	Goserelin may decrease the excretion rate of 1-Phenylethyl acetate which could result in a higher serum level.	0.999872	FALSE	FALSE	Cloves (FOOD00179)
DB00014	Goserelin	FDB010580	2-Phenylethylamine	DDI type 15	Goserelin may decrease the excretion rate of 2-Phenylethylamine which could result in a higher serum level.	0.999437	FALSE	FALSE	Red raspberry (FOOD00162), Cabbage (FOOD00851), White cabbage (FOOD00887), Broccoli (FOOD00034), Swiss chard (FOOD00237), Turnip (FOOD00036), Nanking cherry (FOOD00885), Eggplant (FOOD00174), Spinach (FOOD00178), Orange bell pepper (FOOD00879)
DB00014	Goserelin	FDB010581	N-Methylphenethylamine	DDI type 15	Goserelin may decrease the excretion rate of N-Methylphenethylamine which could result in a higher serum level.	0.997368	FALSE	FALSE	Cabbage (FOOD00851), White cabbage (FOOD00887), Carrot (FOOD00245), Wild carrot (FOOD00072), Apple (FOOD00105), Corn (FOOD00205)
DB00014	Goserelin	FDB010778	N-trans-p-Coumaroyloctopamine	DDI type 13	The therapeutic efficacy of N-trans-p-Coumaroyloctopamine can be decreased when used in combination with Goserelin.	0.97574	FALSE	FALSE	Green bell pepper (FOOD00877), Orange bell pepper (FOOD00879), Pepper (FOOD00040), Red bell pepper (FOOD00880), Yellow bell pepper (FOOD00878)
DB00014	Goserelin	FDB010779	N-trans-Feruloyloctopamine	DDI type 13	The therapeutic efficacy of N-trans-Feruloyloctopamine can be decreased when used in combination with Goserelin.	0.994601	FALSE	FALSE	Green bell pepper (FOOD00877), Orange bell pepper (FOOD00879), Pepper (FOOD00040), Red bell pepper (FOOD00880), Yellow bell pepper (FOOD00878)
DB00014	Goserelin	FDB010873	1-(4-Methoxyphenyl)-2-propanone	DDI type 15	1-(4-Methoxyphenyl)-2-propanone may decrease the excretion rate of Goserelin which could result in a higher serum level.	0.99994	TRUE	FALSE	Anise (FOOD00137)
DB00014	Goserelin	FDB011258	o-Coumaric acid	DDI type 15	o-Coumaric acid may decrease the excretion rate of Goserelin which could result in a higher serum level.	0.945292	TRUE	FALSE	Corn (FOOD00205), Hard wheat (FOOD00242), Olive (FOOD00121), American cranberry (FOOD00192), Fennel (FOOD00082), Date (FOOD00135), Peanut (FOOD00016), Common wheat (FOOD00187), Beer (FOOD00268), Grape wine (FOOD00612)
DB00014	Goserelin	FDB011417	3-Phenylpropyl acetate	DDI type 15	Goserelin may decrease the excretion rate of 3-Phenylpropyl acetate which could result in a higher serum level.	0.99998	FALSE	FALSE	Ceylon cinnamon (FOOD00051)
DB00014	Goserelin	FDB011794	(R)-3-Octyl acetate	DDI type 10	The serum concentration of Goserelin can be increased when it is combined with (R)-3-Octyl acetate.	0.940363	TRUE	FALSE	Spearmint (FOOD00112)
DB00014	Goserelin	FDB011835	3-Phenylpropanal	DDI type 15	Goserelin may decrease the excretion rate of 3-Phenylpropanal which could result in a higher serum level.	0.999507	FALSE	FALSE	Ceylon cinnamon (FOOD00051)
DB00014	Goserelin	FDB011872	Arachidonic acid	DDI type 6	The metabolism of Arachidonic acid can be decreased when combined with Goserelin.	0.968269	FALSE	FALSE	Coho salmon (FOOD00452), Eggs (FOOD00619), Catfish (FOOD00605), Atlantic halibut (FOOD00516), Gadus (Common cod) (FOOD00515), Marine mussel (FOOD00587), Atlantic wolffish (FOOD00296), Cottonseed (FOOD00341), Cattle (Beef, Veal) (FOOD00495), Rabbit (FOOD00528)
DB00014	Goserelin	FDB011952	Hexadecane	DDI type 13	The therapeutic efficacy of Hexadecane can be decreased when used in combination with Goserelin.	0.976819	FALSE	FALSE	Black walnut (FOOD00093)
DB00014	Goserelin	FDB012059	Benzylamine	DDI type 15	Goserelin may decrease the excretion rate of Benzylamine which could result in a higher serum level.	0.999582	FALSE	FALSE	Corn (FOOD00205), Cabbage (FOOD00851), White cabbage (FOOD00887), Carrot (FOOD00245), Wild carrot (FOOD00072), Apple (FOOD00105)
DB00014	Goserelin	FDB012060	3,4-Dihydroxybenzaldehyde	DDI type 15	3,4-Dihydroxybenzaldehyde may decrease the excretion rate of Goserelin which could result in a higher serum level.	0.991659	TRUE	FALSE	Vinegar (FOOD00628), Grape wine (FOOD00612)
DB00014	Goserelin	FDB012152	2-Phenylethanol	DDI type 15	Goserelin may decrease the excretion rate of 2-Phenylethanol which could result in a higher serum level.	0.975654	FALSE	FALSE	Black walnut (FOOD00093), Sweet basil (FOOD00119), Ceylon cinnamon (FOOD00051), Peppermint (FOOD00113), Highbush blueberry (FOOD00191), Bilberry (FOOD00193)
DB00014	Goserelin	FDB012153	2-Phenylethyl acetate	DDI type 15	Goserelin may decrease the excretion rate of 2-Phenylethyl acetate which could result in a higher serum level.	0.999905	FALSE	FALSE	Ceylon cinnamon (FOOD00051), Cloves (FOOD00179)
DB00014	Goserelin	FDB012200	2,3-Dihydroxybenzoic acid	DDI type 15	2,3-Dihydroxybenzoic acid may decrease the excretion rate of Goserelin which could result in a higher serum level.	0.998417	TRUE	FALSE	Cucumber (FOOD00065), Broccoli (FOOD00034), Dill (FOOD00013), Romaine lettuce (FOOD00888), Yellow wax bean (FOOD00882), Garden onion (FOOD00006), Carrot (FOOD00245), Yellow bell pepper (FOOD00878), American cranberry (FOOD00192), Italian sweet red pepper (FOOD00881)
DB00014	Goserelin	FDB012268	Isopropylbenzene	DDI type 15	Goserelin may decrease the excretion rate of Isopropylbenzene which could result in a higher serum level.	0.987466	FALSE	FALSE	Ceylon cinnamon (FOOD00051), Ginger (FOOD00206)
DB00014	Goserelin	FDB012435	Ethyl tetradecanoate	DDI type 13	The therapeutic efficacy of Ethyl tetradecanoate can be decreased when used in combination with Goserelin.	0.947875	FALSE	FALSE	Coriander (FOOD00061)
DB00014	Goserelin	FDB012441	Ethyl stearate	DDI type 13	The therapeutic efficacy of Ethyl stearate can be decreased when used in combination with Goserelin.	0.99961	FALSE	FALSE	Coriander (FOOD00061)
DB00014	Goserelin	FDB012445	(±)-Isobornyl acetate	DDI type 26	The risk or severity of adverse effects can be increased when Goserelin is combined with (±)-Isobornyl acetate.	0.998881	TRUE	TRUE	Spearmint (FOOD00112)
DB00014	Goserelin	FDB012456	2-Hydroxybenzaldehyde	DDI type 15	2-Hydroxybenzaldehyde may decrease the excretion rate of Goserelin which could result in a higher serum level.	0.999912	TRUE	FALSE	Peppermint (FOOD00113)
DB00014	Goserelin	FDB012459	Methyl salicylate	DDI type 15	Methyl salicylate may decrease the excretion rate of Goserelin which could result in a higher serum level.	0.99972	TRUE	FALSE	Hyssop (FOOD00089), Bilberry (FOOD00193)
DB00014	Goserelin	FDB012462	alpha-Linolenic acid	DDI type 6	The metabolism of alpha-Linolenic acid can be decreased when combined with Goserelin.	0.980934	FALSE	FALSE	Flaxseed (FOOD00101), Summer savory (FOOD00167), Chia (FOOD00328), Walnut (FOOD00608), Rape (FOOD00029), Butternut (FOOD00316), Cucumber (FOOD00065), Black walnut (FOOD00093), Common sage (FOOD00165), Cooking oil (FOOD00779)
DB00014	Goserelin	FDB012496	Brassicasterol	DDI type 6	The metabolism of Brassicasterol can be decreased when combined with Goserelin.	0.97882	FALSE	FALSE	Common walnut (FOOD00094)
DB00014	Goserelin	FDB012528	D-Fructose	DDI type 13	The therapeutic efficacy of D-Fructose can be decreased when used in combination with Goserelin.	0.998771	FALSE	FALSE	Honey (FOOD00626), Agave (FOOD00563), Common grape (FOOD00204), Date (FOOD00135), Molasses (FOOD00786), Turmeric (FOOD00068), Garden onion (FOOD00006), Ketchup (FOOD00756), Jackfruit (FOOD00384), Sugar (FOOD00651)
DB00014	Goserelin	FDB012530	D-Glucose	DDI type 13	The therapeutic efficacy of D-Glucose can be decreased when used in combination with Goserelin.	0.997709	FALSE	FALSE	Honey (FOOD00626), Common grape (FOOD00204), Date (FOOD00135), Molasses (FOOD00786), Ketchup (FOOD00756), Marshmallow (FOOD00662), Jackfruit (FOOD00384), Mamey sapote (FOOD00459), Liquorice (FOOD00627), Muskmelon (FOOD00064)
DB00014	Goserelin	FDB012535	L-Glutamic acid	DDI type 26	The risk or severity of adverse effects can be increased when Goserelin is combined with L-Glutamic acid.	0.998614	TRUE	TRUE	Casein (FOOD00659), Other soy product (FOOD00271), Beluga whale (FOOD00300), Gelatin (FOOD00663), Soy bean (FOOD00085), Gelatin dessert (FOOD00725), Meat bouillon (FOOD00657), Cottonseed (FOOD00341), Buttermilk (FOOD00692), Bearded seal (FOOD00466)
DB00014	Goserelin	FDB012536	Glutamic acid	DDI type 26	The risk or severity of adverse effects can be increased when Goserelin is combined with Glutamic acid.	0.998614	TRUE	TRUE	Red bell pepper (FOOD00880), Milk (Cow) (FOOD00618), Wheat (FOOD00561), Oat (FOOD00022), Rye (FOOD00169), Barley (FOOD00088), Swiss chard (FOOD00237), Red beetroot (FOOD00264), Dill (FOOD00013), White cabbage (FOOD00887)
DB00014	Goserelin	FDB012647	N-Methylbenzylamine	DDI type 15	Goserelin may decrease the excretion rate of N-Methylbenzylamine which could result in a higher serum level.	0.998879	FALSE	FALSE	Carrot (FOOD00245), Wild carrot (FOOD00072)
DB00014	Goserelin	FDB012660	Secoisolariciresinol	DDI type 13	The therapeutic efficacy of Secoisolariciresinol can be decreased when used in combination with Goserelin.	0.94522	FALSE	FALSE	Flaxseed (FOOD00101), Rye bread (FOOD00809), Asparagus (FOOD00021), Common buckwheat (FOOD00079), Kiwi (FOOD00004), Sesame (FOOD00170), Sunflower (FOOD00086), Soy bean (FOOD00085), Rye (FOOD00169), Black tea (FOOD00907)
DB00014	Goserelin	FDB012675	S-Allylcysteine	DDI type 26	The risk or severity of adverse effects can be increased when Goserelin is combined with S-Allylcysteine.	0.983052	TRUE	TRUE	Soft-necked garlic (FOOD00850)
DB00014	Goserelin	FDB012675	S-Allylcysteine	DDI type 26	The risk or severity of adverse effects can be increased when S-Allylcysteine is combined with Goserelin.	0.98472	TRUE	TRUE	Soft-necked garlic (FOOD00850)
DB00014	Goserelin	FDB012750	Hordenine	DDI type 15	Goserelin may decrease the excretion rate of Hordenine which could result in a higher serum level.	0.999912	FALSE	FALSE	Barley (FOOD00088)
DB00014	Goserelin	FDB012755	1-(4-Methylphenyl)ethanol	DDI type 15	Goserelin may decrease the excretion rate of 1-(4-Methylphenyl)ethanol which could result in a higher serum level.	0.993081	FALSE	FALSE	Turmeric (FOOD00068)
DB00014	Goserelin	FDB012798	Estrone	DDI type 15	Estrone may decrease the excretion rate of Goserelin which could result in a higher serum level.	0.980175	TRUE	FALSE	Pomegranate (FOOD00151), Apple (FOOD00105)
DB00014	Goserelin	FDB012811	Ergocalciferol	DDI type 10	The serum concentration of Goserelin can be increased when it is combined with Ergocalciferol.	0.988965	TRUE	FALSE	Maitake (FOOD00555), Morchella (Morel) (FOOD00731), Shiitake (FOOD00548), Other beverage (FOOD00667), Enokitake (FOOD00551), Milk (Cow) (FOOD00618)
DB00014	Goserelin	FDB012811	Ergocalciferol	DDI type 6	The metabolism of Ergocalciferol can be decreased when combined with Goserelin.	0.971486	FALSE	FALSE	Maitake (FOOD00555), Morchella (Morel) (FOOD00731), Shiitake (FOOD00548), Other beverage (FOOD00667), Enokitake (FOOD00551), Milk (Cow) (FOOD00618)
DB00014	Goserelin	FDB012844	Benzyl benzoate	DDI type 15	Benzyl benzoate may decrease the excretion rate of Goserelin which could result in a higher serum level.	0.999467	TRUE	FALSE	Ceylon cinnamon (FOOD00051)
DB00014	Goserelin	FDB012887	epsilon-Polylysine	DDI type 26	The risk or severity of adverse effects can be increased when Goserelin is combined with epsilon-Polylysine.	0.997836	TRUE	TRUE	Casein (FOOD00659), Gelatin (FOOD00663), Dried milk (FOOD00689), Thunnus (FOOD00607), Rabbit (FOOD00528), Atlantic halibut (FOOD00516), Garfish (FOOD00579), Cheese (FOOD00617), Shrimp (FOOD00533), Anguilliformes (FOOD00577)
DB00014	Goserelin	FDB012991	Pristane	DDI type 13	The therapeutic efficacy of Pristane can be decreased when used in combination with Goserelin.	0.998584	FALSE	FALSE	Common sage (FOOD00165)
DB00014	Goserelin	FDB013245	(±)-Phenylalanine	DDI type 26	The risk or severity of adverse effects can be increased when (±)-Phenylalanine is combined with Goserelin.	0.998159	TRUE	TRUE	Red bell pepper (FOOD00880), Wheat (FOOD00561), Oat (FOOD00022), Barley (FOOD00088), Rye (FOOD00169), Dill (FOOD00013), Broccoli (FOOD00034), Japanese pumpkin (FOOD00886), Spinach (FOOD00178), Swiss chard (FOOD00237)
DB00014	Goserelin	FDB013257	Gingerenone C	DDI type 13	The therapeutic efficacy of Gingerenone C can be decreased when used in combination with Goserelin.	0.989821	FALSE	FALSE	Ginger (FOOD00206)
DB00014	Goserelin	FDB013257	Gingerenone C	DDI type 6	The metabolism of Gingerenone C can be decreased when combined with Goserelin.	0.976329	FALSE	FALSE	Ginger (FOOD00206)
DB00014	Goserelin	FDB013612	3-Methylbutyl phenylacetate	DDI type 15	3-Methylbutyl phenylacetate may decrease the excretion rate of Goserelin which could result in a higher serum level.	0.997855	TRUE	FALSE	Peppermint (FOOD00113)
DB00014	Goserelin	FDB013612	3-Methylbutyl phenylacetate	DDI type 15	Goserelin may decrease the excretion rate of 3-Methylbutyl phenylacetate which could result in a higher serum level.	0.99912	FALSE	FALSE	Peppermint (FOOD00113)
DB00014	Goserelin	FDB013621	2-Phenylethyl pentanoate	DDI type 15	2-Phenylethyl pentanoate may decrease the excretion rate of Goserelin which could result in a higher serum level.	0.9944	TRUE	FALSE	Peppermint (FOOD00113)
DB00014	Goserelin	FDB013621	2-Phenylethyl pentanoate	DDI type 15	Goserelin may decrease the excretion rate of 2-Phenylethyl pentanoate which could result in a higher serum level.	0.999754	FALSE	FALSE	Peppermint (FOOD00113)
DB00014	Goserelin	FDB014823	Acetylursolic acid	DDI type 15	Acetylursolic acid may decrease the excretion rate of Goserelin which could result in a higher serum level.	0.962406	TRUE	FALSE	Rosemary (FOOD00159)
DB00014	Goserelin	FDB015469	beta-Ionone	DDI type 26	The risk or severity of adverse effects can be increased when Goserelin is combined with beta-Ionone.	0.967206	TRUE	TRUE	Corn (FOOD00205), Black tea (FOOD00907), Green tea (FOOD00908), Herbal tea (FOOD00989), Red tea (FOOD00925), Tea (FOOD00038), Carrot (FOOD00245), Wild carrot (FOOD00072), Common oregano (FOOD00124), Hyssop (FOOD00089)
DB00014	Goserelin	FDB015552	Sinensetin	DDI type 26	The risk or severity of adverse effects can be increased when Goserelin is combined with Sinensetin.	0.95368	TRUE	TRUE	Sweet orange (FOOD00057)
DB00014	Goserelin	FDB015831	Phytoene	DDI type 13	The therapeutic efficacy of Phytoene can be decreased when used in combination with Goserelin.	0.970851	FALSE	FALSE	Sweet potato (FOOD00092), Sweet orange (FOOD00057)
DB00014	Goserelin	FDB017346	1,7,7-Trimethyltricyclo[2.2.1.02,6]heptane	DDI type 26	The risk or severity of adverse effects can be increased when Goserelin is combined with 1,7,7-Trimethyltricyclo[2.2.1.02,6]heptane.	0.998878	TRUE	TRUE	Ginger (FOOD00206), Common sage (FOOD00165), Pot marjoram (FOOD00123)
DB00014	Goserelin	FDB019140	Pentosan polysulfate	DDI type 13	The therapeutic efficacy of Pentosan polysulfate can be decreased when used in combination with Goserelin.	0.992015	FALSE	FALSE	Tamarind (FOOD00180), Fig (FOOD00081)
DB00014	Goserelin	FDB019876	(±)-3-Octyl acetate	DDI type 10	The serum concentration of Goserelin can be increased when it is combined with (±)-3-Octyl acetate.	0.940363	TRUE	FALSE	Orange mint (FOOD00110)
DB00014	Goserelin	FDB020783	Capsiamide	DDI type 13	The therapeutic efficacy of Capsiamide can be decreased when used in combination with Goserelin.	0.988947	FALSE	FALSE	Green bell pepper (FOOD00877), Orange bell pepper (FOOD00879), Pepper (FOOD00040), Red bell pepper (FOOD00880), Yellow bell pepper (FOOD00878), Pepper (C. frutescens) (FOOD00428)
DB00014	Goserelin	FDB021812	Aminoadipic acid	DDI type 26	The risk or severity of adverse effects can be increased when Goserelin is combined with Aminoadipic acid.	0.997727	TRUE	TRUE	Rye (FOOD00169), Wheat (FOOD00561), Broccoli (FOOD00034), Dill (FOOD00013), Sunburst squash (pattypan squash) (FOOD00874), Swiss chard (FOOD00237), Yellow wax bean (FOOD00882), Green zucchini (FOOD00875), Potato (FOOD00175), Green bean (FOOD00883)
DB00014	Goserelin	FDB022621	25-Hydroxyvitamin D2	DDI type 6	The metabolism of 25-Hydroxyvitamin D2 can be decreased when combined with Goserelin.	0.990772	FALSE	FALSE	Milk (Cow) (FOOD00618)
DB00115	Cyanocobalamin	FDB000435	N-Methyltyramine	DDI type 15	Cyanocobalamin may decrease the excretion rate of N-Methyltyramine which could result in a higher serum level.	0.969412	FALSE	FALSE	Barley (FOOD00088)
DB00115	Cyanocobalamin	FDB000765	Hexane	DDI type 26	The risk or severity of adverse effects can be increased when Cyanocobalamin is combined with Hexane.	0.997967	TRUE	TRUE	Kohlrabi (FOOD00033)
DB00115	Cyanocobalamin	FDB000768	Pentane	DDI type 26	The risk or severity of adverse effects can be increased when Cyanocobalamin is combined with Pentane.	0.998638	TRUE	TRUE	Kohlrabi (FOOD00033)
DB00115	Cyanocobalamin	FDB000842	2,4-Dihydroxybenzoic acid	DDI type 15	2,4-Dihydroxybenzoic acid may decrease the excretion rate of Cyanocobalamin which could result in a higher serum level.	0.986836	TRUE	FALSE	American cranberry (FOOD00192), Olive (FOOD00121)
DB00115	Cyanocobalamin	FDB000844	Gentisic acid	DDI type 15	Gentisic acid may decrease the excretion rate of Cyanocobalamin which could result in a higher serum level.	0.993209	TRUE	FALSE	Tarragon (FOOD00019), Common thyme (FOOD00183), Common sage (FOOD00165), Lemon balm (FOOD00108), Parsley (FOOD00131), Rosemary (FOOD00159), Horseradish (FOOD00018), Sweet basil (FOOD00119), Peanut (FOOD00016), Hyssop (FOOD00089)
DB00115	Cyanocobalamin	FDB000845	2,6-Dihydroxybenzoic acid	DDI type 15	2,6-Dihydroxybenzoic acid may decrease the excretion rate of Cyanocobalamin which could result in a higher serum level.	0.999629	TRUE	FALSE	Beer (FOOD00268), Olive (FOOD00121)
DB00115	Cyanocobalamin	FDB000846	Vanillic acid	DDI type 15	Vanillic acid may decrease the excretion rate of Cyanocobalamin which could result in a higher serum level.	0.985297	TRUE	FALSE	Coriander (FOOD00061), Garden onion (FOOD00006), Sweet basil (FOOD00119), Olive (FOOD00121), Common oregano (FOOD00124), Horseradish (FOOD00018), Peanut (FOOD00016), Cocoa powder (FOOD00685), Swiss chard (FOOD00237), Yellow wax bean (FOOD00882)
DB00115	Cyanocobalamin	FDB000848	3,5-Dihydroxybenzoic acid	DDI type 15	3,5-Dihydroxybenzoic acid may decrease the excretion rate of Cyanocobalamin which could result in a higher serum level.	0.998948	TRUE	FALSE	Beer (FOOD00268)
DB00115	Cyanocobalamin	FDB000893	Phenol	DDI type 15	Phenol may decrease the excretion rate of Cyanocobalamin which could result in a higher serum level.	0.98441	TRUE	FALSE	Sweet marjoram (FOOD00122), Arabica coffee (FOOD00059), Coffee (FOOD00058), Robusta coffee (FOOD00060), Safflower (FOOD00042), Cocoa powder (FOOD00685), Highbush blueberry (FOOD00191), Bilberry (FOOD00193)
DB00115	Cyanocobalamin	FDB001066	Nonivamide	DDI type 6	The metabolism of Cyanocobalamin can be decreased when combined with Nonivamide.	0.977873	TRUE	FALSE	Green bell pepper (FOOD00877), Orange bell pepper (FOOD00879), Pepper (FOOD00040), Pepper (C. frutescens) (FOOD00428), Red bell pepper (FOOD00880), Yellow bell pepper (FOOD00878)
DB00115	Cyanocobalamin	FDB001176	Isodulcitol	DDI type 13	The therapeutic efficacy of Isodulcitol can be decreased when used in combination with Cyanocobalamin.	0.995412	FALSE	FALSE	Flaxseed (FOOD00101)
DB00115	Cyanocobalamin	FDB001197	Mannan	DDI type 15	Cyanocobalamin may decrease the excretion rate of Mannan which could result in a higher serum level.	0.998694	FALSE	FALSE	Ginkgo nuts (FOOD00367)
DB00115	Cyanocobalamin	FDB001202	D-Mannose	DDI type 13	The therapeutic efficacy of D-Mannose can be decreased when used in combination with Cyanocobalamin.	0.967248	FALSE	FALSE	Corn (FOOD00205)
DB00115	Cyanocobalamin	FDB001267	Hexyl acetate	DDI type 10	The serum concentration of Cyanocobalamin can be increased when it is combined with Hexyl acetate.	0.948992	TRUE	FALSE	Highbush blueberry (FOOD00191)
DB00115	Cyanocobalamin	FDB001512	1,2-Benzenediol	DDI type 15	1,2-Benzenediol may decrease the excretion rate of Cyanocobalamin which could result in a higher serum level.	0.999573	TRUE	FALSE	Arabica coffee (FOOD00059), Coffee (FOOD00058), Robusta coffee (FOOD00060), Cocoa powder (FOOD00685), Beer (FOOD00268)
DB00115	Cyanocobalamin	FDB002119	6-Propyltridecane	DDI type 26	The risk or severity of adverse effects can be increased when Cyanocobalamin is combined with 6-Propyltridecane.	0.998198	TRUE	TRUE	Black walnut (FOOD00093)
DB00115	Cyanocobalamin	FDB002412	Tangeritin	DDI type 26	The risk or severity of adverse effects can be increased when Cyanocobalamin is combined with Tangeritin.	0.999755	TRUE	TRUE	Sweet orange (FOOD00057)
DB00115	Cyanocobalamin	FDB002881	Alliospiroside D	DDI type 17	Alliospiroside D may decrease the cardiotoxic activities of Cyanocobalamin.	0.96139	TRUE	FALSE	Garden onion (FOOD00006)
DB00115	Cyanocobalamin	FDB003051	Cetyl alcohol	DDI type 26	The risk or severity of adverse effects can be increased when Cyanocobalamin is combined with Cetyl alcohol.	0.968212	TRUE	TRUE	Kohlrabi (FOOD00033)
DB00115	Cyanocobalamin	FDB003175	1-Pentanesulfenothioic acid	DDI type 26	The risk or severity of adverse effects can be increased when Cyanocobalamin is combined with 1-Pentanesulfenothioic acid.	0.999704	TRUE	TRUE	Chives (FOOD00009)
DB00115	Cyanocobalamin	FDB003303	Nonanal	DDI type 10	The serum concentration of Cyanocobalamin can be increased when it is combined with Nonanal.	0.958961	TRUE	FALSE	Corn (FOOD00205), Black tea (FOOD00907), Green tea (FOOD00908), Herbal tea (FOOD00989), Red tea (FOOD00925), Tea (FOOD00038), Ginger (FOOD00206), Lime (FOOD00053), Lemon (FOOD00054), Sweet orange (FOOD00057)
DB00115	Cyanocobalamin	FDB003308	2-Nonanone	DDI type 10	The serum concentration of Cyanocobalamin can be increased when it is combined with 2-Nonanone.	0.965991	TRUE	FALSE	Corn (FOOD00205), Ginger (FOOD00206), Cloves (FOOD00179)
DB00115	Cyanocobalamin	FDB003339	Octanal	DDI type 10	The serum concentration of Cyanocobalamin can be increased when it is combined with Octanal.	0.983	TRUE	FALSE	Lime (FOOD00053), Caraway (FOOD00043), Mandarin orange (Clementine, Tangerine) (FOOD00056), Carrot (FOOD00245), Wild carrot (FOOD00072)
DB00115	Cyanocobalamin	FDB003659	Polysaccharides	DDI type 15	Cyanocobalamin may decrease the excretion rate of Polysaccharides which could result in a higher serum level.	0.966067	FALSE	FALSE	Soy bean (FOOD00085)
DB00115	Cyanocobalamin	FDB003693	Salicylates	DDI type 15	Salicylates may decrease the excretion rate of Cyanocobalamin which could result in a higher serum level.	0.998139	TRUE	FALSE	Common thyme (FOOD00183), Turmeric (FOOD00068), Peppermint (FOOD00113), Rosemary (FOOD00159), Mandarin orange (Clementine, Tangerine) (FOOD00056), Colorado pinyon (FOOD00433), Common walnut (FOOD00094), Pomegranate (FOOD00151)
DB00115	Cyanocobalamin	FDB003938	Flavonoids	DDI type 27	The risk or severity of bleeding can be increased when Flavonoids is combined with Cyanocobalamin.	0.99401	TRUE	TRUE	Common grape (FOOD00204), Passion fruit (FOOD00128), Fig (FOOD00081), Blackcurrant (FOOD00155), Rose hip (FOOD00446), Turmeric (FOOD00068)
DB00115	Cyanocobalamin	FDB003965	N-Pentyl benzene	DDI type 15	Cyanocobalamin may decrease the excretion rate of N-Pentyl benzene which could result in a higher serum level.	0.999809	FALSE	FALSE	Wild celery (FOOD00015)
DB00115	Cyanocobalamin	FDB004105	1-Heptadecene	DDI type 26	The risk or severity of adverse effects can be increased when Cyanocobalamin is combined with 1-Heptadecene.	0.999151	TRUE	TRUE	Safflower (FOOD00042)
DB00115	Cyanocobalamin	FDB004731	N-Tetradecane	DDI type 26	The risk or severity of adverse effects can be increased when Cyanocobalamin is combined with N-Tetradecane.	0.998865	TRUE	TRUE	Black walnut (FOOD00093)
DB00115	Cyanocobalamin	FDB004763	Ethyl benzene	DDI type 15	Cyanocobalamin may decrease the excretion rate of Ethyl benzene which could result in a higher serum level.	0.999911	FALSE	FALSE	Black walnut (FOOD00093), Safflower (FOOD00042)
DB00115	Cyanocobalamin	FDB005197	Ethyl pentadecanoate	DDI type 26	The risk or severity of adverse effects can be increased when Cyanocobalamin is combined with Ethyl pentadecanoate.	0.987832	TRUE	TRUE	Coriander (FOOD00061)
DB00115	Cyanocobalamin	FDB005482	Glycosides	DDI type 10	The serum concentration of Glycosides can be increased when it is combined with Cyanocobalamin.	0.960381	FALSE	FALSE	Apricot (FOOD00144), Fig (FOOD00081)
DB00115	Cyanocobalamin	FDB005802	Calamene	DDI type 26	The risk or severity of adverse effects can be increased when Cyanocobalamin is combined with Calamene.	0.998447	TRUE	TRUE	Star anise (FOOD00090), Common sage (FOOD00165)
DB00115	Cyanocobalamin	FDB005802	Calamene	DDI type 13	The therapeutic efficacy of Cyanocobalamin can be decreased when used in combination with Calamene.	0.998554	TRUE	FALSE	Star anise (FOOD00090), Common sage (FOOD00165)
DB00115	Cyanocobalamin	FDB005827	3-Methyltridecane	DDI type 26	The risk or severity of adverse effects can be increased when Cyanocobalamin is combined with 3-Methyltridecane.	0.996439	TRUE	TRUE	Black walnut (FOOD00093)
DB00115	Cyanocobalamin	FDB006365	alpha,alpha-Dimethylbenzyl alcohol	DDI type 15	Cyanocobalamin may decrease the excretion rate of alpha,alpha-Dimethylbenzyl alcohol which could result in a higher serum level.	0.999851	FALSE	FALSE	Pot marjoram (FOOD00123)
DB00115	Cyanocobalamin	FDB006916	alpha-Fenchyl acetate	DDI type 26	The risk or severity of adverse effects can be increased when Cyanocobalamin is combined with alpha-Fenchyl acetate.	0.999785	TRUE	TRUE	Rosemary (FOOD00159)
DB00115	Cyanocobalamin	FDB007855	Alliospiroside B	DDI type 17	Alliospiroside B may decrease the cardiotoxic activities of Cyanocobalamin.	0.946228	TRUE	FALSE	Garden onion (FOOD00006)
DB00115	Cyanocobalamin	FDB008053	1-Heptanol	DDI type 26	The risk or severity of adverse effects can be increased when Cyanocobalamin is combined with 1-Heptanol.	0.995312	TRUE	TRUE	Corn (FOOD00205), Black walnut (FOOD00093), Mandarin orange (Clementine, Tangerine) (FOOD00056)
DB00115	Cyanocobalamin	FDB008072	1-Hexanol	DDI type 26	The risk or severity of adverse effects can be increased when Cyanocobalamin is combined with 1-Hexanol.	0.99353	TRUE	TRUE	Corn (FOOD00205), Black walnut (FOOD00093), Lovage (FOOD00100), Hyssop (FOOD00089), Milk (Cow) (FOOD00618), Safflower (FOOD00042), Soft-necked garlic (FOOD00850), Parsley (FOOD00131), Sweet orange (FOOD00057), Bilberry (FOOD00193)
DB00115	Cyanocobalamin	FDB008230	1-Pentanol	DDI type 26	The risk or severity of adverse effects can be increased when Cyanocobalamin is combined with 1-Pentanol.	0.998626	TRUE	TRUE	Black walnut (FOOD00093), Common thyme (FOOD00183), Black tea (FOOD00907), Green tea (FOOD00908), Herbal tea (FOOD00989), Red tea (FOOD00925), Tea (FOOD00038), Milk (Cow) (FOOD00618), Safflower (FOOD00042), Bilberry (FOOD00193)
DB00115	Cyanocobalamin	FDB008739	Benzoic acid	DDI type 15	Benzoic acid may decrease the excretion rate of Cyanocobalamin which could result in a higher serum level.	0.994707	TRUE	FALSE	American cranberry (FOOD00192), Italian sweet red pepper (FOOD00881), Garden onion (FOOD00006), Dill (FOOD00013), Broccoli (FOOD00034), Parsnip (FOOD00129), Green zucchini (FOOD00875), Cocoa powder (FOOD00685), Milk (Cow) (FOOD00618), Cucumber (FOOD00065)
DB00115	Cyanocobalamin	FDB009029	Bornyl acetate	DDI type 26	The risk or severity of adverse effects can be increased when Cyanocobalamin is combined with Bornyl acetate.	0.999784	TRUE	TRUE	Rosemary (FOOD00159), Common sage (FOOD00165), Sweet basil (FOOD00119), Common thyme (FOOD00183), Spearmint (FOOD00112), Ginger (FOOD00206), Cumin (FOOD00067), Carrot (FOOD00245), Wild carrot (FOOD00072), Ceylon cinnamon (FOOD00051)
DB00115	Cyanocobalamin	FDB009636	Isoborneol	DDI type 26	The risk or severity of adverse effects can be increased when Cyanocobalamin is combined with Isoborneol.	0.977214	TRUE	TRUE	Common sage (FOOD00165), Turmeric (FOOD00068), Rosemary (FOOD00159), Common oregano (FOOD00124)
DB00115	Cyanocobalamin	FDB010039	Pentylamine	DDI type 26	The risk or severity of adverse effects can be increased when Cyanocobalamin is combined with Pentylamine.	0.985434	TRUE	TRUE	Green bell pepper (FOOD00877), Orange bell pepper (FOOD00879), Pepper (FOOD00040), Red bell pepper (FOOD00880), Yellow bell pepper (FOOD00878), Cabbage (FOOD00851), White cabbage (FOOD00887), Apple (FOOD00105)
DB00115	Cyanocobalamin	FDB010420	Fenchyl acetate	DDI type 26	The risk or severity of adverse effects can be increased when Cyanocobalamin is combined with Fenchyl acetate.	0.999785	TRUE	TRUE	Sweet basil (FOOD00119)
DB00115	Cyanocobalamin	FDB010504	4-Hydroxybenzaldehyde	DDI type 15	4-Hydroxybenzaldehyde may decrease the excretion rate of Cyanocobalamin which could result in a higher serum level.	0.975423	TRUE	FALSE	Vinegar (FOOD00628), Oat (FOOD00022)
DB00115	Cyanocobalamin	FDB010507	3-Hydroxybenzoic acid	DDI type 15	3-Hydroxybenzoic acid may decrease the excretion rate of Cyanocobalamin which could result in a higher serum level.	0.999202	TRUE	FALSE	American cranberry (FOOD00192), Beer (FOOD00268)
DB00115	Cyanocobalamin	FDB010508	4-Hydroxybenzoic acid	DDI type 15	4-Hydroxybenzoic acid may decrease the excretion rate of Cyanocobalamin which could result in a higher serum level.	0.997083	TRUE	FALSE	Red huckleberry (FOOD00223), Rabbiteye blueberry (FOOD00898), Coriander (FOOD00061), Garden onion (FOOD00006), Loquat (FOOD00076), Highbush blueberry (FOOD00191), Olive (FOOD00121), Strawberry (FOOD00083), Swiss chard (FOOD00237), Carrot (FOOD00245)
DB00115	Cyanocobalamin	FDB010527	Zingerone	DDI type 15	Zingerone may decrease the excretion rate of Cyanocobalamin which could result in a higher serum level.	0.998767	TRUE	FALSE	Pot marjoram (FOOD00123), Ginger (FOOD00206)
DB00115	Cyanocobalamin	FDB010539	2-Vinylphenol	DDI type 15	2-Vinylphenol may decrease the excretion rate of Cyanocobalamin which could result in a higher serum level.	0.998981	TRUE	FALSE	Ceylon cinnamon (FOOD00051)
DB00115	Cyanocobalamin	FDB010560	Ethyl phenylacetate	DDI type 15	Cyanocobalamin may decrease the excretion rate of Ethyl phenylacetate which could result in a higher serum level.	0.999793	FALSE	FALSE	Corn (FOOD00205)
DB00115	Cyanocobalamin	FDB010563	1-Phenylethyl acetate	DDI type 15	Cyanocobalamin may decrease the excretion rate of 1-Phenylethyl acetate which could result in a higher serum level.	0.999619	FALSE	FALSE	Cloves (FOOD00179)
DB00115	Cyanocobalamin	FDB010580	2-Phenylethylamine	DDI type 15	Cyanocobalamin may decrease the excretion rate of 2-Phenylethylamine which could result in a higher serum level.	0.999909	FALSE	FALSE	Red raspberry (FOOD00162), Cabbage (FOOD00851), White cabbage (FOOD00887), Broccoli (FOOD00034), Swiss chard (FOOD00237), Turnip (FOOD00036), Nanking cherry (FOOD00885), Eggplant (FOOD00174), Spinach (FOOD00178), Orange bell pepper (FOOD00879)
DB00115	Cyanocobalamin	FDB010581	N-Methylphenethylamine	DDI type 15	Cyanocobalamin may decrease the excretion rate of N-Methylphenethylamine which could result in a higher serum level.	0.999909	FALSE	FALSE	Cabbage (FOOD00851), White cabbage (FOOD00887), Carrot (FOOD00245), Wild carrot (FOOD00072), Apple (FOOD00105), Corn (FOOD00205)
DB00115	Cyanocobalamin	FDB010747	Ciceritol	DDI type 15	Cyanocobalamin may decrease the excretion rate of Ciceritol which could result in a higher serum level.	0.996691	FALSE	FALSE	Soy bean (FOOD00085)
DB00115	Cyanocobalamin	FDB010779	N-trans-Feruloyloctopamine	DDI type 13	The therapeutic efficacy of Cyanocobalamin can be decreased when used in combination with N-trans-Feruloyloctopamine.	0.950371	TRUE	FALSE	Green bell pepper (FOOD00877), Orange bell pepper (FOOD00879), Pepper (FOOD00040), Red bell pepper (FOOD00880), Yellow bell pepper (FOOD00878)
DB00115	Cyanocobalamin	FDB010873	1-(4-Methoxyphenyl)-2-propanone	DDI type 15	1-(4-Methoxyphenyl)-2-propanone may decrease the excretion rate of Cyanocobalamin which could result in a higher serum level.	0.998723	TRUE	FALSE	Anise (FOOD00137)
DB00115	Cyanocobalamin	FDB011258	o-Coumaric acid	DDI type 15	o-Coumaric acid may decrease the excretion rate of Cyanocobalamin which could result in a higher serum level.	0.98277	TRUE	FALSE	Corn (FOOD00205), Hard wheat (FOOD00242), Olive (FOOD00121), American cranberry (FOOD00192), Fennel (FOOD00082), Date (FOOD00135), Peanut (FOOD00016), Common wheat (FOOD00187), Beer (FOOD00268), Grape wine (FOOD00612)
DB00115	Cyanocobalamin	FDB011417	3-Phenylpropyl acetate	DDI type 15	Cyanocobalamin may decrease the excretion rate of 3-Phenylpropyl acetate which could result in a higher serum level.	0.999679	FALSE	FALSE	Ceylon cinnamon (FOOD00051)
DB00115	Cyanocobalamin	FDB011546	24-Methylenelophenol	DDI type 26	The risk or severity of adverse effects can be increased when Cyanocobalamin is combined with 24-Methylenelophenol.	0.974306	TRUE	TRUE	Evening primrose (FOOD00120)
DB00115	Cyanocobalamin	FDB011835	3-Phenylpropanal	DDI type 15	Cyanocobalamin may decrease the excretion rate of 3-Phenylpropanal which could result in a higher serum level.	0.997549	FALSE	FALSE	Ceylon cinnamon (FOOD00051)
DB00115	Cyanocobalamin	FDB011952	Hexadecane	DDI type 26	The risk or severity of adverse effects can be increased when Cyanocobalamin is combined with Hexadecane.	0.998761	TRUE	TRUE	Black walnut (FOOD00093)
DB00115	Cyanocobalamin	FDB012059	Benzylamine	DDI type 15	Cyanocobalamin may decrease the excretion rate of Benzylamine which could result in a higher serum level.	0.999915	FALSE	FALSE	Corn (FOOD00205), Cabbage (FOOD00851), White cabbage (FOOD00887), Carrot (FOOD00245), Wild carrot (FOOD00072), Apple (FOOD00105)
DB00115	Cyanocobalamin	FDB012060	3,4-Dihydroxybenzaldehyde	DDI type 15	3,4-Dihydroxybenzaldehyde may decrease the excretion rate of Cyanocobalamin which could result in a higher serum level.	0.953194	TRUE	FALSE	Vinegar (FOOD00628), Grape wine (FOOD00612)
DB00115	Cyanocobalamin	FDB012148	Dextrin	DDI type 15	Cyanocobalamin may decrease the excretion rate of Dextrin which could result in a higher serum level.	0.966067	FALSE	FALSE	Rice (FOOD00125), Arabica coffee (FOOD00059)
DB00115	Cyanocobalamin	FDB012152	2-Phenylethanol	DDI type 15	Cyanocobalamin may decrease the excretion rate of 2-Phenylethanol which could result in a higher serum level.	0.998402	FALSE	FALSE	Black walnut (FOOD00093), Sweet basil (FOOD00119), Ceylon cinnamon (FOOD00051), Peppermint (FOOD00113), Highbush blueberry (FOOD00191), Bilberry (FOOD00193)
DB00115	Cyanocobalamin	FDB012153	2-Phenylethyl acetate	DDI type 15	Cyanocobalamin may decrease the excretion rate of 2-Phenylethyl acetate which could result in a higher serum level.	0.999802	FALSE	FALSE	Ceylon cinnamon (FOOD00051), Cloves (FOOD00179)
DB00115	Cyanocobalamin	FDB012171	Eugenol	DDI type 15	Eugenol may decrease the excretion rate of Cyanocobalamin which could result in a higher serum level.	0.997649	TRUE	FALSE	Cloves (FOOD00179), Allspice (FOOD00287), Carrot (FOOD00245), Wild carrot (FOOD00072), Sweet basil (FOOD00119), Turmeric (FOOD00068), Ceylon cinnamon (FOOD00051), Sweet marjoram (FOOD00122), Sweet bay (FOOD00097), Hyssop (FOOD00089)
DB00115	Cyanocobalamin	FDB012188	3-Phenyl-1-propanol	DDI type 15	Cyanocobalamin may decrease the excretion rate of 3-Phenyl-1-propanol which could result in a higher serum level.	0.999495	FALSE	FALSE	Bilberry (FOOD00193)
DB00115	Cyanocobalamin	FDB012200	2,3-Dihydroxybenzoic acid	DDI type 15	2,3-Dihydroxybenzoic acid may decrease the excretion rate of Cyanocobalamin which could result in a higher serum level.	0.999336	TRUE	FALSE	Cucumber (FOOD00065), Broccoli (FOOD00034), Dill (FOOD00013), Romaine lettuce (FOOD00888), Yellow wax bean (FOOD00882), Garden onion (FOOD00006), Carrot (FOOD00245), Yellow bell pepper (FOOD00878), American cranberry (FOOD00192), Italian sweet red pepper (FOOD00881)
DB00115	Cyanocobalamin	FDB012268	Isopropylbenzene	DDI type 15	Cyanocobalamin may decrease the excretion rate of Isopropylbenzene which could result in a higher serum level.	0.999939	FALSE	FALSE	Ceylon cinnamon (FOOD00051), Ginger (FOOD00206)
DB00115	Cyanocobalamin	FDB012435	Ethyl tetradecanoate	DDI type 26	The risk or severity of adverse effects can be increased when Cyanocobalamin is combined with Ethyl tetradecanoate.	0.951153	TRUE	TRUE	Coriander (FOOD00061)
DB00115	Cyanocobalamin	FDB012441	Ethyl stearate	DDI type 13	The therapeutic efficacy of Ethyl stearate can be decreased when used in combination with Cyanocobalamin.	0.993578	FALSE	FALSE	Coriander (FOOD00061)
DB00115	Cyanocobalamin	FDB012445	(±)-Isobornyl acetate	DDI type 26	The risk or severity of adverse effects can be increased when Cyanocobalamin is combined with (±)-Isobornyl acetate.	0.999784	TRUE	TRUE	Spearmint (FOOD00112)
DB00115	Cyanocobalamin	FDB012456	2-Hydroxybenzaldehyde	DDI type 15	2-Hydroxybenzaldehyde may decrease the excretion rate of Cyanocobalamin which could result in a higher serum level.	0.99967	TRUE	FALSE	Peppermint (FOOD00113)
DB00115	Cyanocobalamin	FDB012459	Methyl salicylate	DDI type 15	Methyl salicylate may decrease the excretion rate of Cyanocobalamin which could result in a higher serum level.	0.999955	TRUE	FALSE	Hyssop (FOOD00089), Bilberry (FOOD00193)
DB00115	Cyanocobalamin	FDB012528	D-Fructose	DDI type 13	The therapeutic efficacy of D-Fructose can be decreased when used in combination with Cyanocobalamin.	0.972903	FALSE	FALSE	Honey (FOOD00626), Agave (FOOD00563), Common grape (FOOD00204), Date (FOOD00135), Molasses (FOOD00786), Turmeric (FOOD00068), Garden onion (FOOD00006), Ketchup (FOOD00756), Jackfruit (FOOD00384), Sugar (FOOD00651)
DB00115	Cyanocobalamin	FDB012530	D-Glucose	DDI type 13	The therapeutic efficacy of D-Glucose can be decreased when used in combination with Cyanocobalamin.	0.967248	FALSE	FALSE	Honey (FOOD00626), Common grape (FOOD00204), Date (FOOD00135), Molasses (FOOD00786), Ketchup (FOOD00756), Marshmallow (FOOD00662), Jackfruit (FOOD00384), Mamey sapote (FOOD00459), Liquorice (FOOD00627), Muskmelon (FOOD00064)
DB00115	Cyanocobalamin	FDB012647	N-Methylbenzylamine	DDI type 15	Cyanocobalamin may decrease the excretion rate of N-Methylbenzylamine which could result in a higher serum level.	0.999927	FALSE	FALSE	Carrot (FOOD00245), Wild carrot (FOOD00072)
DB00115	Cyanocobalamin	FDB012660	Secoisolariciresinol	DDI type 26	The risk or severity of adverse effects can be increased when Cyanocobalamin is combined with Secoisolariciresinol.	0.996513	TRUE	TRUE	Flaxseed (FOOD00101), Rye bread (FOOD00809), Asparagus (FOOD00021), Common buckwheat (FOOD00079), Kiwi (FOOD00004), Sesame (FOOD00170), Sunflower (FOOD00086), Soy bean (FOOD00085), Rye (FOOD00169), Black tea (FOOD00907)
DB00115	Cyanocobalamin	FDB012696	Dolichosterone	DDI type 26	The risk or severity of adverse effects can be increased when Cyanocobalamin is combined with Dolichosterone.	0.978251	TRUE	TRUE	Rice (FOOD00125)
DB00115	Cyanocobalamin	FDB012750	Hordenine	DDI type 15	Cyanocobalamin may decrease the excretion rate of Hordenine which could result in a higher serum level.	0.999648	FALSE	FALSE	Barley (FOOD00088)
DB00115	Cyanocobalamin	FDB012755	1-(4-Methylphenyl)ethanol	DDI type 15	Cyanocobalamin may decrease the excretion rate of 1-(4-Methylphenyl)ethanol which could result in a higher serum level.	0.99992	FALSE	FALSE	Turmeric (FOOD00068)
DB00115	Cyanocobalamin	FDB012844	Benzyl benzoate	DDI type 15	Benzyl benzoate may decrease the excretion rate of Cyanocobalamin which could result in a higher serum level.	0.970446	TRUE	FALSE	Ceylon cinnamon (FOOD00051)
DB00115	Cyanocobalamin	FDB013173	Soyasaponin I	DDI type 17	Soyasaponin I may decrease the cardiotoxic activities of Cyanocobalamin.	0.987774	TRUE	FALSE	Soy bean (FOOD00085)
DB00115	Cyanocobalamin	FDB013245	(±)-Phenylalanine	DDI type 13	The therapeutic efficacy of Cyanocobalamin can be decreased when used in combination with (±)-Phenylalanine.	0.951709	TRUE	FALSE	Red bell pepper (FOOD00880), Wheat (FOOD00561), Oat (FOOD00022), Barley (FOOD00088), Rye (FOOD00169), Dill (FOOD00013), Broccoli (FOOD00034), Japanese pumpkin (FOOD00886), Spinach (FOOD00178), Swiss chard (FOOD00237)
DB00115	Cyanocobalamin	FDB013522	Fenchol	DDI type 26	The risk or severity of adverse effects can be increased when Cyanocobalamin is combined with Fenchol.	0.973699	TRUE	TRUE	Sweet basil (FOOD00119), Lime (FOOD00053)
DB00115	Cyanocobalamin	FDB013574	(±)-Borneol	DDI type 26	The risk or severity of adverse effects can be increased when Cyanocobalamin is combined with (±)-Borneol.	0.977214	TRUE	TRUE	Common sage (FOOD00165), Cardamom (FOOD00074), Rosemary (FOOD00159), Pot marjoram (FOOD00123), Common thyme (FOOD00183), Spearmint (FOOD00112), Common oregano (FOOD00124), Lime (FOOD00053), Coriander (FOOD00061), Ceylon cinnamon (FOOD00051)
DB00115	Cyanocobalamin	FDB013612	3-Methylbutyl phenylacetate	DDI type 15	3-Methylbutyl phenylacetate may decrease the excretion rate of Cyanocobalamin which could result in a higher serum level.	0.998589	TRUE	FALSE	Peppermint (FOOD00113)
DB00115	Cyanocobalamin	FDB013612	3-Methylbutyl phenylacetate	DDI type 15	Cyanocobalamin may decrease the excretion rate of 3-Methylbutyl phenylacetate which could result in a higher serum level.	0.998972	FALSE	FALSE	Peppermint (FOOD00113)
DB00115	Cyanocobalamin	FDB013621	2-Phenylethyl pentanoate	DDI type 15	2-Phenylethyl pentanoate may decrease the excretion rate of Cyanocobalamin which could result in a higher serum level.	0.9816	TRUE	FALSE	Peppermint (FOOD00113)
DB00115	Cyanocobalamin	FDB013621	2-Phenylethyl pentanoate	DDI type 15	Cyanocobalamin may decrease the excretion rate of 2-Phenylethyl pentanoate which could result in a higher serum level.	0.998867	FALSE	FALSE	Peppermint (FOOD00113)
DB00115	Cyanocobalamin	FDB013828	Retinol	DDI type 26	The risk or severity of adverse effects can be increased when Cyanocobalamin is combined with Retinol.	0.986899	TRUE	TRUE	Haddock (FOOD00374), Gadus (Common cod) (FOOD00515), Anatidae (FOOD00576), Anguilliformes (FOOD00577), Spotted seal (FOOD00423), Butterfat (FOOD00760), Margarine (FOOD00843), Margarine-like spread (FOOD00844), Northern bluefin tuna (FOOD00305), Butter (FOOD00648)
DB00115	Cyanocobalamin	FDB013868	4-Isopropyl-2-methoxy-1-methylbenzene	DDI type 6	The metabolism of Cyanocobalamin can be decreased when combined with 4-Isopropyl-2-methoxy-1-methylbenzene.	0.993906	TRUE	FALSE	Pot marjoram (FOOD00123)
DB00115	Cyanocobalamin	FDB014346	Hexanenitrile	DDI type 26	The risk or severity of adverse effects can be increased when Cyanocobalamin is combined with Hexanenitrile.	0.999775	TRUE	TRUE	Kohlrabi (FOOD00033)
DB00115	Cyanocobalamin	FDB014504	Folic acid	DDI type 13	The therapeutic efficacy of Cyanocobalamin can be decreased when used in combination with Folic acid.	0.992785	TRUE	FALSE	Jute (FOOD00389), Spinach (FOOD00178), Leavening agent (FOOD00661), Garland chrysanthemum (FOOD00333), Endive (FOOD00048), Cabbage (FOOD00851), Parsley (FOOD00131), Asparagus (FOOD00021), Sour cherry (FOOD00146), Yardlong bean (FOOD00540)
DB00115	Cyanocobalamin	FDB014580	(+)-Borneol	DDI type 26	The risk or severity of adverse effects can be increased when Cyanocobalamin is combined with (+)-Borneol.	0.977214	TRUE	TRUE	Nutmeg (FOOD00118), Ginger (FOOD00206)
DB00115	Cyanocobalamin	FDB014797	Thymol methyl ether	DDI type 6	The metabolism of Cyanocobalamin can be decreased when combined with Thymol methyl ether.	0.994862	TRUE	FALSE	Common thyme (FOOD00183), Common oregano (FOOD00124), Mandarin orange (Clementine, Tangerine) (FOOD00056), Lime (FOOD00053), Sweet basil (FOOD00119)
DB00115	Cyanocobalamin	FDB014823	Acetylursolic acid	DDI type 13	The therapeutic efficacy of Cyanocobalamin can be decreased when used in combination with Acetylursolic acid.	0.971118	TRUE	FALSE	Rosemary (FOOD00159)
DB00115	Cyanocobalamin	FDB015199	Nordihydrocapsaicin	DDI type 6	The metabolism of Cyanocobalamin can be decreased when combined with Nordihydrocapsaicin.	0.995968	TRUE	FALSE	Green bell pepper (FOOD00877), Orange bell pepper (FOOD00879), Pepper (FOOD00040), Red bell pepper (FOOD00880), Yellow bell pepper (FOOD00878), Pepper (C. frutescens) (FOOD00428)
DB00115	Cyanocobalamin	FDB015200	Homocapsaicin	DDI type 6	The metabolism of Cyanocobalamin can be decreased when combined with Homocapsaicin.	0.960898	TRUE	FALSE	Green bell pepper (FOOD00877), Orange bell pepper (FOOD00879), Pepper (FOOD00040), Red bell pepper (FOOD00880), Yellow bell pepper (FOOD00878), Pepper (C. frutescens) (FOOD00428)
DB00115	Cyanocobalamin	FDB015352	Geosmin	DDI type 15	Cyanocobalamin may decrease the excretion rate of Geosmin which could result in a higher serum level.	0.998715	FALSE	FALSE	Corn (FOOD00205)
DB00115	Cyanocobalamin	FDB015469	beta-Ionone	DDI type 26	The risk or severity of adverse effects can be increased when Cyanocobalamin is combined with beta-Ionone.	0.999522	TRUE	TRUE	Corn (FOOD00205), Black tea (FOOD00907), Green tea (FOOD00908), Herbal tea (FOOD00989), Red tea (FOOD00925), Tea (FOOD00038), Carrot (FOOD00245), Wild carrot (FOOD00072), Common oregano (FOOD00124), Hyssop (FOOD00089)
DB00115	Cyanocobalamin	FDB015552	Sinensetin	DDI type 26	The risk or severity of adverse effects can be increased when Cyanocobalamin is combined with Sinensetin.	0.999705	TRUE	TRUE	Sweet orange (FOOD00057)
DB00115	Cyanocobalamin	FDB015831	Phytoene	DDI type 13	The therapeutic efficacy of Cyanocobalamin can be decreased when used in combination with Phytoene.	0.97366	TRUE	FALSE	Sweet potato (FOOD00092), Sweet orange (FOOD00057)
DB00115	Cyanocobalamin	FDB016033	1-Isopropyl-3-methylbenzene	DDI type 15	Cyanocobalamin may decrease the excretion rate of 1-Isopropyl-3-methylbenzene which could result in a higher serum level.	0.999867	FALSE	FALSE	Sweet basil (FOOD00119), Blackcurrant (FOOD00155)
DB00115	Cyanocobalamin	FDB017346	1,7,7-Trimethyltricyclo[2.2.1.02,6]heptane	DDI type 26	The risk or severity of adverse effects can be increased when Cyanocobalamin is combined with 1,7,7-Trimethyltricyclo[2.2.1.02,6]heptane.	0.999052	TRUE	TRUE	Ginger (FOOD00206), Common sage (FOOD00165), Pot marjoram (FOOD00123)
DB00115	Cyanocobalamin	FDB017816	Dihydrocapsaicin	DDI type 6	The metabolism of Cyanocobalamin can be decreased when combined with Dihydrocapsaicin.	0.986724	TRUE	FALSE	Green bell pepper (FOOD00877), Orange bell pepper (FOOD00879), Pepper (FOOD00040), Red bell pepper (FOOD00880), Yellow bell pepper (FOOD00878), Pepper (C. frutescens) (FOOD00428)
DB00115	Cyanocobalamin	FDB018227	Heliantriol C	DDI type 13	The therapeutic efficacy of Cyanocobalamin can be decreased when used in combination with Heliantriol C.	0.991997	TRUE	FALSE	Sunflower (FOOD00086)
DB00115	Cyanocobalamin	FDB019140	Pentosan polysulfate	DDI type 13	The therapeutic efficacy of Pentosan polysulfate can be decreased when used in combination with Cyanocobalamin.	0.955712	FALSE	FALSE	Tamarind (FOOD00180), Fig (FOOD00081)
DB00115	Cyanocobalamin	FDB019921	Ethyl hexanoate	DDI type 10	The serum concentration of Cyanocobalamin can be increased when it is combined with Ethyl hexanoate.	0.944575	TRUE	FALSE	Passion fruit (FOOD00128), Pineapple (FOOD00012)
DB00115	Cyanocobalamin	FDB020807	Capsicoside A1	DDI type 17	Capsicoside A1 may decrease the cardiotoxic activities of Cyanocobalamin.	0.952074	TRUE	FALSE	Green bell pepper (FOOD00877), Orange bell pepper (FOOD00879), Pepper (FOOD00040), Red bell pepper (FOOD00880), Yellow bell pepper (FOOD00878)
DB00115	Cyanocobalamin	FDB020924	Alliofuroside A	DDI type 17	Alliofuroside A may decrease the cardiotoxic activities of Cyanocobalamin.	0.990819	TRUE	FALSE	Garden onion (FOOD00006)
DB00115	Cyanocobalamin	FDB021782	25-Hydroxycholecalciferol	DDI type 26	The risk or severity of adverse effects can be increased when Cyanocobalamin is combined with 25-Hydroxycholecalciferol.	0.991957	TRUE	TRUE	Sausage (FOOD00652), Other animal fat (FOOD00682), Domestic pig (FOOD00536), Milk (Cow) (FOOD00618)
DB00115	Cyanocobalamin	FDB021793	24,25-Dihydroxyvitamin D3	DDI type 26	The risk or severity of adverse effects can be increased when Cyanocobalamin is combined with 24,25-Dihydroxyvitamin D3.	0.997973	TRUE	TRUE	Haddock (FOOD00374), Gadus (Common cod) (FOOD00515), Salmonidae (Salmon, Trout) (FOOD00493), Lake trout (FOOD00582), Anguilliformes (FOOD00577), Atlantic halibut (FOOD00516), Charr (FOOD00571), Greenland halibut/turbot (FOOD00370), Rainbow trout (FOOD00444), Clupeinae (Herring, Sardine, Sprat) (FOOD00520)
DB00115	Cyanocobalamin	FDB021793	24,25-Dihydroxyvitamin D3	DDI type 13	The therapeutic efficacy of Cyanocobalamin can be decreased when used in combination with 24,25-Dihydroxyvitamin D3.	0.969184	TRUE	FALSE	Haddock (FOOD00374), Gadus (Common cod) (FOOD00515), Salmonidae (Salmon, Trout) (FOOD00493), Lake trout (FOOD00582), Anguilliformes (FOOD00577), Atlantic halibut (FOOD00516), Charr (FOOD00571), Greenland halibut/turbot (FOOD00370), Rainbow trout (FOOD00444), Clupeinae (Herring, Sardine, Sprat) (FOOD00520)
DB00121	Biotin	FDB000332	7-Hydroxysecoisolariciresinol	DDI type 15	7-Hydroxysecoisolariciresinol may decrease the excretion rate of Biotin which could result in a higher serum level.	0.999822	TRUE	FALSE	Sesame (FOOD00170)
DB00121	Biotin	FDB000332	7-Hydroxysecoisolariciresinol	DDI type 13	The therapeutic efficacy of Biotin can be decreased when used in combination with 7-Hydroxysecoisolariciresinol.	0.958565	TRUE	FALSE	Sesame (FOOD00170)
DB00121	Biotin	FDB000344	Hydroxytyrosol acetate	DDI type 26	The risk or severity of adverse effects can be increased when Hydroxytyrosol acetate is combined with Biotin.	0.989838	TRUE	TRUE	Olive (FOOD00121)
DB00121	Biotin	FDB000345	p-HPEA-AC	DDI type 26	The risk or severity of adverse effects can be increased when p-HPEA-AC is combined with Biotin.	0.989837	TRUE	TRUE	Olive (FOOD00121)
DB00121	Biotin	FDB000446	L-Tyrosine	DDI type 26	The risk or severity of adverse effects can be increased when L-Tyrosine is combined with Biotin.	0.99988	TRUE	TRUE	Milk (Cow) (FOOD00618), Casein (FOOD00659), Other soy product (FOOD00271), Beluga whale (FOOD00300), Red bell pepper (FOOD00880), Buttermilk (FOOD00692), Smelt (FOOD00519), Soy bean (FOOD00085), Spirulina (FOOD00480), Dried milk (FOOD00689)
DB00121	Biotin	FDB000474	L-Lysine	DDI type 26	The risk or severity of adverse effects can be increased when Biotin is combined with L-Lysine.	0.995821	TRUE	TRUE	Milk (Cow) (FOOD00618), Beluga whale (FOOD00300), Red bell pepper (FOOD00880), Casein (FOOD00659), Bearded seal (FOOD00466), Gelatin (FOOD00663), Smelt (FOOD00519), Gelatin dessert (FOOD00725), Other soy product (FOOD00271), Whitefish (FOOD00503)
DB00121	Biotin	FDB000558	Alliin	DDI type 26	The risk or severity of adverse effects can be increased when Biotin is combined with Alliin.	0.968578	TRUE	TRUE	Soft-necked garlic (FOOD00850)
DB00121	Biotin	FDB000558	Alliin	DDI type 26	The risk or severity of adverse effects can be increased when Alliin is combined with Biotin.	0.996834	TRUE	TRUE	Soft-necked garlic (FOOD00850)
DB00121	Biotin	FDB000567	L-DOPA	DDI type 26	The risk or severity of adverse effects can be increased when L-DOPA is combined with Biotin.	0.999586	TRUE	TRUE	Broad bean (FOOD00197), Swiss chard (FOOD00237), Yellow wax bean (FOOD00882), Spinach (FOOD00178), Green bean (FOOD00883), Red beetroot (FOOD00264), Broccoli (FOOD00034), Dill (FOOD00013), Orange bell pepper (FOOD00879), Yellow zucchini (FOOD00876)
DB00121	Biotin	FDB000753	Ethanol	DDI type 26	The risk or severity of adverse effects can be increased when Biotin is combined with Ethanol.	0.999045	TRUE	TRUE	Gin (FOOD00625), Other alcoholic beverage (FOOD00278), Rum (FOOD00629), Vodka (FOOD00622), Spirit (FOOD00276), Whisky (FOOD00623), Liquor (FOOD00616), Madeira wine (FOOD00633), Vanilla (FOOD00195), Sake (FOOD00738)
DB00121	Biotin	FDB000757	Nonane	DDI type 26	The risk or severity of adverse effects can be increased when Biotin is combined with Nonane.	0.94943	TRUE	TRUE	Lime (FOOD00053), Common oregano (FOOD00124)
DB00121	Biotin	FDB000757	Nonane	DDI type 26	The risk or severity of adverse effects can be increased when Nonane is combined with Biotin.	0.974121	TRUE	TRUE	Lime (FOOD00053), Common oregano (FOOD00124)
DB00121	Biotin	FDB000765	Hexane	DDI type 26	The risk or severity of adverse effects can be increased when Biotin is combined with Hexane.	0.999077	TRUE	TRUE	Kohlrabi (FOOD00033)
DB00121	Biotin	FDB000768	Pentane	DDI type 26	The risk or severity of adverse effects can be increased when Biotin is combined with Pentane.	0.999212	TRUE	TRUE	Kohlrabi (FOOD00033)
DB00121	Biotin	FDB000768	Pentane	DDI type 26	The risk or severity of adverse effects can be increased when Pentane is combined with Biotin.	0.970055	TRUE	TRUE	Kohlrabi (FOOD00033)
DB00121	Biotin	FDB000893	Phenol	DDI type 15	Phenol may decrease the excretion rate of Biotin which could result in a higher serum level.	0.999667	TRUE	FALSE	Sweet marjoram (FOOD00122), Arabica coffee (FOOD00059), Coffee (FOOD00058), Robusta coffee (FOOD00060), Safflower (FOOD00042), Cocoa powder (FOOD00685), Highbush blueberry (FOOD00191), Bilberry (FOOD00193)
DB00121	Biotin	FDB001022	Ethyl hexadecanoate	DDI type 13	The therapeutic efficacy of Ethyl hexadecanoate can be decreased when used in combination with Biotin.	0.964811	FALSE	FALSE	Coriander (FOOD00061)
DB00121	Biotin	FDB001022	Ethyl hexadecanoate	DDI type 26	The risk or severity of adverse effects can be increased when Ethyl hexadecanoate is combined with Biotin.	0.995052	TRUE	TRUE	Coriander (FOOD00061)
DB00121	Biotin	FDB001304	alpha1-Sitosterol	DDI type 26	The risk or severity of adverse effects can be increased when Biotin is combined with alpha1-Sitosterol.	0.983025	TRUE	TRUE	Evening primrose (FOOD00120)
DB00121	Biotin	FDB001512	1,2-Benzenediol	DDI type 15	1,2-Benzenediol may decrease the excretion rate of Biotin which could result in a higher serum level.	0.998696	TRUE	FALSE	Arabica coffee (FOOD00059), Coffee (FOOD00058), Robusta coffee (FOOD00060), Cocoa powder (FOOD00685), Beer (FOOD00268)
DB00121	Biotin	FDB002119	6-Propyltridecane	DDI type 13	The therapeutic efficacy of 6-Propyltridecane can be decreased when used in combination with Biotin.	0.956936	FALSE	FALSE	Black walnut (FOOD00093)
DB00121	Biotin	FDB002412	Tangeritin	DDI type 26	The risk or severity of adverse effects can be increased when Tangeritin is combined with Biotin.	0.977658	TRUE	TRUE	Sweet orange (FOOD00057)
DB00121	Biotin	FDB002590	m-Coumaric acid	DDI type 13	The therapeutic efficacy of Biotin can be decreased when used in combination with m-Coumaric acid.	0.985752	TRUE	FALSE	Olive (FOOD00121), Corn (FOOD00205), Beer (FOOD00268)
DB00121	Biotin	FDB003051	Cetyl alcohol	DDI type 26	The risk or severity of adverse effects can be increased when Biotin is combined with Cetyl alcohol.	0.999774	TRUE	TRUE	Kohlrabi (FOOD00033)
DB00121	Biotin	FDB003051	Cetyl alcohol	DDI type 26	The risk or severity of adverse effects can be increased when Cetyl alcohol is combined with Biotin.	0.996021	TRUE	TRUE	Kohlrabi (FOOD00033)
DB00121	Biotin	FDB003107	Coronaric acid	DDI type 26	The risk or severity of adverse effects can be increased when Coronaric acid is combined with Biotin.	0.976603	TRUE	TRUE	Rice (FOOD00125)
DB00121	Biotin	FDB003175	1-Pentanesulfenothioic acid	DDI type 26	The risk or severity of adverse effects can be increased when Biotin is combined with 1-Pentanesulfenothioic acid.	0.998364	TRUE	TRUE	Chives (FOOD00009)
DB00121	Biotin	FDB003175	1-Pentanesulfenothioic acid	DDI type 26	The risk or severity of adverse effects can be increased when 1-Pentanesulfenothioic acid is combined with Biotin.	0.973231	TRUE	TRUE	Chives (FOOD00009)
DB00121	Biotin	FDB003598	17alpha-ethynylestradiol	DDI type 13	The therapeutic efficacy of Biotin can be decreased when used in combination with 17alpha-ethynylestradiol.	0.982549	TRUE	FALSE	Cloves (FOOD00179), Cardamom (FOOD00074), Ginkgo nuts (FOOD00367), Nutmeg (FOOD00118), Star anise (FOOD00090), Ginger (FOOD00206), Ceylon cinnamon (FOOD00051), Cumin (FOOD00067), Pot marjoram (FOOD00123), Anise (FOOD00137)
DB00121	Biotin	FDB003654	Ornithine	DDI type 26	The risk or severity of adverse effects can be increased when Biotin is combined with Ornithine.	0.9998	TRUE	TRUE	Green zucchini (FOOD00875), Potato (FOOD00175), Garden onion (FOOD00006), Broccoli (FOOD00034), Sunburst squash (pattypan squash) (FOOD00874), Spinach (FOOD00178), Cucumber (FOOD00065), Yellow bell pepper (FOOD00878), Green bell pepper (FOOD00877), Orange bell pepper (FOOD00879)
DB00121	Biotin	FDB003685	S-Allylmercaptocysteine	DDI type 26	The risk or severity of adverse effects can be increased when S-Allylmercaptocysteine is combined with Biotin.	0.99207	TRUE	TRUE	Soft-necked garlic (FOOD00850)
DB00121	Biotin	FDB003771	Gadoleic acid	DDI type 26	The risk or severity of adverse effects can be increased when Biotin is combined with Gadoleic acid.	0.997822	TRUE	TRUE	Fish oil (FOOD00990), Other fish product (FOOD00665), Lumpsucker (FOOD00585), White mustard (FOOD00413), Greenland halibut/turbot (FOOD00370), Scombridae (Bonito, Mackerel, Tuna) (FOOD00586), Gadus (Common cod) (FOOD00515), Anguilliformes (FOOD00577), Rape (FOOD00029), Colorado pinyon (FOOD00433)
DB00121	Biotin	FDB003771	Gadoleic acid	DDI type 26	The risk or severity of adverse effects can be increased when Gadoleic acid is combined with Biotin.	0.992082	TRUE	TRUE	Fish oil (FOOD00990), Other fish product (FOOD00665), Lumpsucker (FOOD00585), White mustard (FOOD00413), Greenland halibut/turbot (FOOD00370), Scombridae (Bonito, Mackerel, Tuna) (FOOD00586), Gadus (Common cod) (FOOD00515), Anguilliformes (FOOD00577), Rape (FOOD00029), Colorado pinyon (FOOD00433)
DB00121	Biotin	FDB004105	1-Heptadecene	DDI type 26	The risk or severity of adverse effects can be increased when Biotin is combined with 1-Heptadecene.	0.996727	TRUE	TRUE	Safflower (FOOD00042)
DB00121	Biotin	FDB004234	Melatonin	DDI type 26	The risk or severity of adverse effects can be increased when Biotin is combined with Melatonin.	0.999537	TRUE	TRUE	Corn (FOOD00205)
DB00121	Biotin	FDB004676	Heptadecanoic acid	DDI type 26	The risk or severity of adverse effects can be increased when Biotin is combined with Heptadecanoic acid.	0.999016	TRUE	TRUE	Cinnamon (FOOD00572), Cattle (Beef, Veal) (FOOD00495), Sturgeon (FOOD00570), Crab (FOOD00573), Sausage (FOOD00652), Rabbit (FOOD00528), Cashew nut (FOOD00011), Oyster mushroom (FOOD00553), Clawed lobster (FOOD00584), Atlantic halibut (FOOD00516)
DB00121	Biotin	FDB004676	Heptadecanoic acid	DDI type 26	The risk or severity of adverse effects can be increased when Heptadecanoic acid is combined with Biotin.	0.999257	TRUE	TRUE	Cinnamon (FOOD00572), Cattle (Beef, Veal) (FOOD00495), Sturgeon (FOOD00570), Crab (FOOD00573), Sausage (FOOD00652), Rabbit (FOOD00528), Cashew nut (FOOD00011), Oyster mushroom (FOOD00553), Clawed lobster (FOOD00584), Atlantic halibut (FOOD00516)
DB00121	Biotin	FDB004683	Obtusifoliol	DDI type 26	The risk or severity of adverse effects can be increased when Biotin is combined with Obtusifoliol.	0.971182	TRUE	TRUE	Evening primrose (FOOD00120)
DB00121	Biotin	FDB004731	N-Tetradecane	DDI type 26	The risk or severity of adverse effects can be increased when Biotin is combined with N-Tetradecane.	0.997673	TRUE	TRUE	Black walnut (FOOD00093)
DB00121	Biotin	FDB004731	N-Tetradecane	DDI type 26	The risk or severity of adverse effects can be increased when N-Tetradecane is combined with Biotin.	0.989799	TRUE	TRUE	Black walnut (FOOD00093)
DB00121	Biotin	FDB004763	Ethyl benzene	DDI type 26	The risk or severity of adverse effects can be increased when Ethyl benzene is combined with Biotin.	0.980201	TRUE	TRUE	Black walnut (FOOD00093), Safflower (FOOD00042)
DB00121	Biotin	FDB005197	Ethyl pentadecanoate	DDI type 26	The risk or severity of adverse effects can be increased when Ethyl pentadecanoate is combined with Biotin.	0.998834	TRUE	TRUE	Coriander (FOOD00061)
DB00121	Biotin	FDB005482	Glycosides	DDI type 10	The serum concentration of Glycosides can be increased when it is combined with Biotin.	0.991333	FALSE	FALSE	Apricot (FOOD00144), Fig (FOOD00081)
DB00121	Biotin	FDB005802	Calamene	DDI type 26	The risk or severity of adverse effects can be increased when Calamene is combined with Biotin.	0.998796	TRUE	TRUE	Star anise (FOOD00090), Common sage (FOOD00165)
DB00121	Biotin	FDB005827	3-Methyltridecane	DDI type 26	The risk or severity of adverse effects can be increased when 3-Methyltridecane is combined with Biotin.	0.962784	TRUE	TRUE	Black walnut (FOOD00093)
DB00121	Biotin	FDB006916	alpha-Fenchyl acetate	DDI type 26	The risk or severity of adverse effects can be increased when Biotin is combined with alpha-Fenchyl acetate.	0.994952	TRUE	TRUE	Rosemary (FOOD00159)
DB00121	Biotin	FDB006916	alpha-Fenchyl acetate	DDI type 26	The risk or severity of adverse effects can be increased when alpha-Fenchyl acetate is combined with Biotin.	0.997397	TRUE	TRUE	Rosemary (FOOD00159)
DB00121	Biotin	FDB006925	cis-Myrtenol	DDI type 26	The risk or severity of adverse effects can be increased when cis-Myrtenol is combined with Biotin.	0.986815	TRUE	TRUE	Rosemary (FOOD00159)
DB00121	Biotin	FDB007498	Diethylstilbesterol	DDI type 7	The metabolism of Diethylstilbesterol can be increased when combined with Biotin.	0.994704	FALSE	FALSE	Gram bean (FOOD00199)
DB00121	Biotin	FDB007498	Diethylstilbesterol	DDI type 26	The risk or severity of adverse effects can be increased when Diethylstilbesterol is combined with Biotin.	0.995696	TRUE	TRUE	Gram bean (FOOD00199)
DB00121	Biotin	FDB007640	6,10,14-Trimethylpentadecan-2-one	DDI type 13	The therapeutic efficacy of 6,10,14-Trimethylpentadecan-2-one can be decreased when used in combination with Biotin.	0.988324	FALSE	FALSE	Common oregano (FOOD00124)
DB00121	Biotin	FDB008048	Heptanal	DDI type 26	The risk or severity of adverse effects can be increased when Heptanal is combined with Biotin.	0.963359	TRUE	TRUE	Corn (FOOD00205), Black tea (FOOD00907), Green tea (FOOD00908), Herbal tea (FOOD00989), Red tea (FOOD00925), Tea (FOOD00038), Milk (Cow) (FOOD00618), Lemon (FOOD00054), Sweet orange (FOOD00057), Carrot (FOOD00245)
DB00121	Biotin	FDB008051	Heptanoic acid	DDI type 26	The risk or severity of adverse effects can be increased when Heptanoic acid is combined with Biotin.	0.980377	TRUE	TRUE	Butter (FOOD00648), Tofu (FOOD00696), Cinnamon (FOOD00572), Smelt (FOOD00519), Chinese cinnamon (FOOD00050), Bearded seal (FOOD00466), Cattle (Beef, Veal) (FOOD00495), Macadamia nut (FOOD00525), Margarine-like spread (FOOD00844), Shortening (FOOD00783)
DB00121	Biotin	FDB008068	Hexanal	DDI type 26	The risk or severity of adverse effects can be increased when Hexanal is combined with Biotin.	0.964762	TRUE	TRUE	Corn (FOOD00205), Black walnut (FOOD00093), Black tea (FOOD00907), Green tea (FOOD00908), Herbal tea (FOOD00989), Red tea (FOOD00925), Tea (FOOD00038), Milk (Cow) (FOOD00618), Orange mint (FOOD00110), Common oregano (FOOD00124)
DB00121	Biotin	FDB008230	1-Pentanol	DDI type 26	The risk or severity of adverse effects can be increased when Biotin is combined with 1-Pentanol.	0.99618	TRUE	TRUE	Black walnut (FOOD00093), Common thyme (FOOD00183), Black tea (FOOD00907), Green tea (FOOD00908), Herbal tea (FOOD00989), Red tea (FOOD00925), Tea (FOOD00038), Milk (Cow) (FOOD00618), Safflower (FOOD00042), Bilberry (FOOD00193)
DB00121	Biotin	FDB008230	1-Pentanol	DDI type 26	The risk or severity of adverse effects can be increased when 1-Pentanol is combined with Biotin.	0.98625	TRUE	TRUE	Black walnut (FOOD00093), Common thyme (FOOD00183), Black tea (FOOD00907), Green tea (FOOD00908), Herbal tea (FOOD00989), Red tea (FOOD00925), Tea (FOOD00038), Milk (Cow) (FOOD00618), Safflower (FOOD00042), Bilberry (FOOD00193)
DB00121	Biotin	FDB008789	4-Methylphenol	DDI type 26	The risk or severity of adverse effects can be increased when 4-Methylphenol is combined with Biotin.	0.978085	TRUE	TRUE	Peppermint (FOOD00113), Bilberry (FOOD00193)
DB00121	Biotin	FDB009029	Bornyl acetate	DDI type 26	The risk or severity of adverse effects can be increased when Biotin is combined with Bornyl acetate.	0.995857	TRUE	TRUE	Rosemary (FOOD00159), Common sage (FOOD00165), Sweet basil (FOOD00119), Common thyme (FOOD00183), Spearmint (FOOD00112), Ginger (FOOD00206), Cumin (FOOD00067), Carrot (FOOD00245), Wild carrot (FOOD00072), Ceylon cinnamon (FOOD00051)
DB00121	Biotin	FDB009029	Bornyl acetate	DDI type 26	The risk or severity of adverse effects can be increased when Bornyl acetate is combined with Biotin.	0.99727	TRUE	TRUE	Rosemary (FOOD00159), Common sage (FOOD00165), Sweet basil (FOOD00119), Common thyme (FOOD00183), Spearmint (FOOD00112), Ginger (FOOD00206), Cumin (FOOD00067), Carrot (FOOD00245), Wild carrot (FOOD00072), Ceylon cinnamon (FOOD00051)
DB00121	Biotin	FDB010039	Pentylamine	DDI type 26	The risk or severity of adverse effects can be increased when Biotin is combined with Pentylamine.	0.999788	TRUE	TRUE	Green bell pepper (FOOD00877), Orange bell pepper (FOOD00879), Pepper (FOOD00040), Red bell pepper (FOOD00880), Yellow bell pepper (FOOD00878), Cabbage (FOOD00851), White cabbage (FOOD00887), Apple (FOOD00105)
DB00121	Biotin	FDB010039	Pentylamine	DDI type 26	The risk or severity of adverse effects can be increased when Pentylamine is combined with Biotin.	0.987266	TRUE	TRUE	Green bell pepper (FOOD00877), Orange bell pepper (FOOD00879), Pepper (FOOD00040), Red bell pepper (FOOD00880), Yellow bell pepper (FOOD00878), Cabbage (FOOD00851), White cabbage (FOOD00887), Apple (FOOD00105)
DB00121	Biotin	FDB010420	Fenchyl acetate	DDI type 26	The risk or severity of adverse effects can be increased when Biotin is combined with Fenchyl acetate.	0.994952	TRUE	TRUE	Sweet basil (FOOD00119)
DB00121	Biotin	FDB010420	Fenchyl acetate	DDI type 26	The risk or severity of adverse effects can be increased when Fenchyl acetate is combined with Biotin.	0.997397	TRUE	TRUE	Sweet basil (FOOD00119)
DB00121	Biotin	FDB010507	3-Hydroxybenzoic acid	DDI type 15	3-Hydroxybenzoic acid may decrease the excretion rate of Biotin which could result in a higher serum level.	0.990132	TRUE	FALSE	American cranberry (FOOD00192), Beer (FOOD00268)
DB00121	Biotin	FDB010527	Zingerone	DDI type 15	Zingerone may decrease the excretion rate of Biotin which could result in a higher serum level.	0.999822	TRUE	FALSE	Pot marjoram (FOOD00123), Ginger (FOOD00206)
DB00121	Biotin	FDB010539	2-Vinylphenol	DDI type 15	2-Vinylphenol may decrease the excretion rate of Biotin which could result in a higher serum level.	0.995808	TRUE	FALSE	Ceylon cinnamon (FOOD00051)
DB00121	Biotin	FDB010563	1-Phenylethyl acetate	DDI type 26	The risk or severity of adverse effects can be increased when 1-Phenylethyl acetate is combined with Biotin.	0.976899	TRUE	TRUE	Cloves (FOOD00179)
DB00121	Biotin	FDB010580	2-Phenylethylamine	DDI type 26	The risk or severity of adverse effects can be increased when Biotin is combined with 2-Phenylethylamine.	0.981917	TRUE	TRUE	Red raspberry (FOOD00162), Cabbage (FOOD00851), White cabbage (FOOD00887), Broccoli (FOOD00034), Swiss chard (FOOD00237), Turnip (FOOD00036), Nanking cherry (FOOD00885), Eggplant (FOOD00174), Spinach (FOOD00178), Orange bell pepper (FOOD00879)
DB00121	Biotin	FDB010580	2-Phenylethylamine	DDI type 26	The risk or severity of adverse effects can be increased when 2-Phenylethylamine is combined with Biotin.	0.999512	TRUE	TRUE	Red raspberry (FOOD00162), Cabbage (FOOD00851), White cabbage (FOOD00887), Broccoli (FOOD00034), Swiss chard (FOOD00237), Turnip (FOOD00036), Nanking cherry (FOOD00885), Eggplant (FOOD00174), Spinach (FOOD00178), Orange bell pepper (FOOD00879)
DB00121	Biotin	FDB010873	1-(4-Methoxyphenyl)-2-propanone	DDI type 15	1-(4-Methoxyphenyl)-2-propanone may decrease the excretion rate of Biotin which could result in a higher serum level.	0.999757	TRUE	FALSE	Anise (FOOD00137)
DB00121	Biotin	FDB011417	3-Phenylpropyl acetate	DDI type 13	The therapeutic efficacy of 3-Phenylpropyl acetate can be decreased when used in combination with Biotin.	0.970885	FALSE	FALSE	Ceylon cinnamon (FOOD00051)
DB00121	Biotin	FDB011546	24-Methylenelophenol	DDI type 26	The risk or severity of adverse effects can be increased when Biotin is combined with 24-Methylenelophenol.	0.993401	TRUE	TRUE	Evening primrose (FOOD00120)
DB00121	Biotin	FDB011835	3-Phenylpropanal	DDI type 26	The risk or severity of adverse effects can be increased when 3-Phenylpropanal is combined with Biotin.	0.999015	TRUE	TRUE	Ceylon cinnamon (FOOD00051)
DB00121	Biotin	FDB012027	Decanoic acid	DDI type 13	The therapeutic efficacy of Biotin can be decreased when used in combination with Decanoic acid.	0.965004	TRUE	FALSE	Babassu palm (FOOD00773), Coconut (FOOD00336), Butterfat (FOOD00760), Butter (FOOD00648), Oil palm (FOOD00591), Coffee mocha (FOOD00743), Common sage (FOOD00165), Margarine-like spread (FOOD00844), Cream (FOOD00650), Ucuhuba (FOOD00777)
DB00121	Biotin	FDB012059	Benzylamine	DDI type 26	The risk or severity of adverse effects can be increased when Biotin is combined with Benzylamine.	0.953054	TRUE	TRUE	Corn (FOOD00205), Cabbage (FOOD00851), White cabbage (FOOD00887), Carrot (FOOD00245), Wild carrot (FOOD00072), Apple (FOOD00105)
DB00121	Biotin	FDB012059	Benzylamine	DDI type 26	The risk or severity of adverse effects can be increased when Benzylamine is combined with Biotin.	0.978461	TRUE	TRUE	Corn (FOOD00205), Cabbage (FOOD00851), White cabbage (FOOD00887), Carrot (FOOD00245), Wild carrot (FOOD00072), Apple (FOOD00105)
DB00121	Biotin	FDB012060	3,4-Dihydroxybenzaldehyde	DDI type 7	The metabolism of 3,4-Dihydroxybenzaldehyde can be increased when combined with Biotin.	0.985656	FALSE	FALSE	Vinegar (FOOD00628), Grape wine (FOOD00612)
DB00121	Biotin	FDB012152	2-Phenylethanol	DDI type 15	Biotin may decrease the excretion rate of 2-Phenylethanol which could result in a higher serum level.	0.976766	FALSE	FALSE	Black walnut (FOOD00093), Sweet basil (FOOD00119), Ceylon cinnamon (FOOD00051), Peppermint (FOOD00113), Highbush blueberry (FOOD00191), Bilberry (FOOD00193)
DB00121	Biotin	FDB012153	2-Phenylethyl acetate	DDI type 13	The therapeutic efficacy of 2-Phenylethyl acetate can be decreased when used in combination with Biotin.	0.990172	FALSE	FALSE	Ceylon cinnamon (FOOD00051), Cloves (FOOD00179)
DB00121	Biotin	FDB012153	2-Phenylethyl acetate	DDI type 26	The risk or severity of adverse effects can be increased when 2-Phenylethyl acetate is combined with Biotin.	0.963943	TRUE	TRUE	Ceylon cinnamon (FOOD00051), Cloves (FOOD00179)
DB00121	Biotin	FDB012158	Serotonin	DDI type 26	The risk or severity of adverse effects can be increased when Serotonin is combined with Biotin.	0.999954	TRUE	TRUE	Sea-buckthornberry (FOOD00087), Common walnut (FOOD00094), Oat (FOOD00022), Swiss chard (FOOD00237), Pineapple (FOOD00012), Nanking cherry (FOOD00885), Barley (FOOD00088), Rye (FOOD00169), Pomegranate (FOOD00151), Date (FOOD00135)
DB00121	Biotin	FDB012171	Eugenol	DDI type 15	Eugenol may decrease the excretion rate of Biotin which could result in a higher serum level.	0.999835	TRUE	FALSE	Cloves (FOOD00179), Allspice (FOOD00287), Carrot (FOOD00245), Wild carrot (FOOD00072), Sweet basil (FOOD00119), Turmeric (FOOD00068), Ceylon cinnamon (FOOD00051), Sweet marjoram (FOOD00122), Sweet bay (FOOD00097), Hyssop (FOOD00089)
DB00121	Biotin	FDB012268	Isopropylbenzene	DDI type 26	The risk or severity of adverse effects can be increased when Isopropylbenzene is combined with Biotin.	0.972865	TRUE	TRUE	Ceylon cinnamon (FOOD00051), Ginger (FOOD00206)
DB00121	Biotin	FDB012435	Ethyl tetradecanoate	DDI type 26	The risk or severity of adverse effects can be increased when Ethyl tetradecanoate is combined with Biotin.	0.999083	TRUE	TRUE	Coriander (FOOD00061)
DB00121	Biotin	FDB012441	Ethyl stearate	DDI type 13	The therapeutic efficacy of Ethyl stearate can be decreased when used in combination with Biotin.	0.995104	FALSE	FALSE	Coriander (FOOD00061)
DB00121	Biotin	FDB012445	(±)-Isobornyl acetate	DDI type 26	The risk or severity of adverse effects can be increased when Biotin is combined with (±)-Isobornyl acetate.	0.995857	TRUE	TRUE	Spearmint (FOOD00112)
DB00121	Biotin	FDB012445	(±)-Isobornyl acetate	DDI type 26	The risk or severity of adverse effects can be increased when (±)-Isobornyl acetate is combined with Biotin.	0.99727	TRUE	TRUE	Spearmint (FOOD00112)
DB00121	Biotin	FDB012456	2-Hydroxybenzaldehyde	DDI type 15	2-Hydroxybenzaldehyde may decrease the excretion rate of Biotin which could result in a higher serum level.	0.999433	TRUE	FALSE	Peppermint (FOOD00113)
DB00121	Biotin	FDB012459	Methyl salicylate	DDI type 15	Methyl salicylate may decrease the excretion rate of Biotin which could result in a higher serum level.	0.999466	TRUE	FALSE	Hyssop (FOOD00089), Bilberry (FOOD00193)
DB00121	Biotin	FDB012494	Clerosterol	DDI type 26	The risk or severity of adverse effects can be increased when Biotin is combined with Clerosterol.	0.989232	TRUE	TRUE	Common walnut (FOOD00094)
DB00121	Biotin	FDB012535	L-Glutamic acid	DDI type 26	The risk or severity of adverse effects can be increased when Biotin is combined with L-Glutamic acid.	0.998062	TRUE	TRUE	Casein (FOOD00659), Other soy product (FOOD00271), Beluga whale (FOOD00300), Gelatin (FOOD00663), Soy bean (FOOD00085), Gelatin dessert (FOOD00725), Meat bouillon (FOOD00657), Cottonseed (FOOD00341), Buttermilk (FOOD00692), Bearded seal (FOOD00466)
DB00121	Biotin	FDB012535	L-Glutamic acid	DDI type 26	The risk or severity of adverse effects can be increased when L-Glutamic acid is combined with Biotin.	0.955167	TRUE	TRUE	Casein (FOOD00659), Other soy product (FOOD00271), Beluga whale (FOOD00300), Gelatin (FOOD00663), Soy bean (FOOD00085), Gelatin dessert (FOOD00725), Meat bouillon (FOOD00657), Cottonseed (FOOD00341), Buttermilk (FOOD00692), Bearded seal (FOOD00466)
DB00121	Biotin	FDB012536	Glutamic acid	DDI type 26	The risk or severity of adverse effects can be increased when Biotin is combined with Glutamic acid.	0.998062	TRUE	TRUE	Red bell pepper (FOOD00880), Milk (Cow) (FOOD00618), Wheat (FOOD00561), Oat (FOOD00022), Rye (FOOD00169), Barley (FOOD00088), Swiss chard (FOOD00237), Red beetroot (FOOD00264), Dill (FOOD00013), White cabbage (FOOD00887)
DB00121	Biotin	FDB012536	Glutamic acid	DDI type 26	The risk or severity of adverse effects can be increased when Glutamic acid is combined with Biotin.	0.955167	TRUE	TRUE	Red bell pepper (FOOD00880), Milk (Cow) (FOOD00618), Wheat (FOOD00561), Oat (FOOD00022), Rye (FOOD00169), Barley (FOOD00088), Swiss chard (FOOD00237), Red beetroot (FOOD00264), Dill (FOOD00013), White cabbage (FOOD00887)
DB00121	Biotin	FDB012569	Gondoic acid	DDI type 26	The risk or severity of adverse effects can be increased when Biotin is combined with Gondoic acid.	0.997822	TRUE	TRUE	Macadamia nut (FOOD00525)
DB00121	Biotin	FDB012569	Gondoic acid	DDI type 26	The risk or severity of adverse effects can be increased when Gondoic acid is combined with Biotin.	0.992082	TRUE	TRUE	Macadamia nut (FOOD00525)
DB00121	Biotin	FDB012647	N-Methylbenzylamine	DDI type 26	The risk or severity of adverse effects can be increased when N-Methylbenzylamine is combined with Biotin.	0.988122	TRUE	TRUE	Carrot (FOOD00245), Wild carrot (FOOD00072)
DB00121	Biotin	FDB012660	Secoisolariciresinol	DDI type 15	Secoisolariciresinol may decrease the excretion rate of Biotin which could result in a higher serum level.	0.999485	TRUE	FALSE	Flaxseed (FOOD00101), Rye bread (FOOD00809), Asparagus (FOOD00021), Common buckwheat (FOOD00079), Kiwi (FOOD00004), Sesame (FOOD00170), Sunflower (FOOD00086), Soy bean (FOOD00085), Rye (FOOD00169), Black tea (FOOD00907)
DB00121	Biotin	FDB012660	Secoisolariciresinol	DDI type 26	The risk or severity of adverse effects can be increased when Secoisolariciresinol is combined with Biotin.	0.978121	TRUE	TRUE	Flaxseed (FOOD00101), Rye bread (FOOD00809), Asparagus (FOOD00021), Common buckwheat (FOOD00079), Kiwi (FOOD00004), Sesame (FOOD00170), Sunflower (FOOD00086), Soy bean (FOOD00085), Rye (FOOD00169), Black tea (FOOD00907)
DB00121	Biotin	FDB012675	S-Allylcysteine	DDI type 26	The risk or severity of adverse effects can be increased when S-Allylcysteine is combined with Biotin.	0.997132	TRUE	TRUE	Soft-necked garlic (FOOD00850)
DB00121	Biotin	FDB012696	Dolichosterone	DDI type 26	The risk or severity of adverse effects can be increased when Biotin is combined with Dolichosterone.	0.999692	TRUE	TRUE	Rice (FOOD00125)
DB00121	Biotin	FDB012733	delta7-Avenasterol	DDI type 26	The risk or severity of adverse effects can be increased when Biotin is combined with delta7-Avenasterol.	0.991199	TRUE	TRUE	Common walnut (FOOD00094)
DB00121	Biotin	FDB012750	Hordenine	DDI type 26	The risk or severity of adverse effects can be increased when Hordenine is combined with Biotin.	0.969597	TRUE	TRUE	Barley (FOOD00088)
DB00121	Biotin	FDB012798	Estrone	DDI type 7	The metabolism of Estrone can be increased when combined with Biotin.	0.982419	FALSE	FALSE	Pomegranate (FOOD00151), Apple (FOOD00105)
DB00121	Biotin	FDB012844	Benzyl benzoate	DDI type 15	Benzyl benzoate may decrease the excretion rate of Biotin which could result in a higher serum level.	0.999741	TRUE	FALSE	Ceylon cinnamon (FOOD00051)
DB00121	Biotin	FDB012887	epsilon-Polylysine	DDI type 26	The risk or severity of adverse effects can be increased when Biotin is combined with epsilon-Polylysine.	0.995821	TRUE	TRUE	Casein (FOOD00659), Gelatin (FOOD00663), Dried milk (FOOD00689), Thunnus (FOOD00607), Rabbit (FOOD00528), Atlantic halibut (FOOD00516), Garfish (FOOD00579), Cheese (FOOD00617), Shrimp (FOOD00533), Anguilliformes (FOOD00577)
DB00121	Biotin	FDB012991	Pristane	DDI type 13	The therapeutic efficacy of Biotin can be decreased when used in combination with Pristane.	0.998404	TRUE	FALSE	Common sage (FOOD00165)
DB00121	Biotin	FDB013245	(±)-Phenylalanine	DDI type 26	The risk or severity of adverse effects can be increased when (±)-Phenylalanine is combined with Biotin.	0.999947	TRUE	TRUE	Red bell pepper (FOOD00880), Wheat (FOOD00561), Oat (FOOD00022), Barley (FOOD00088), Rye (FOOD00169), Dill (FOOD00013), Broccoli (FOOD00034), Japanese pumpkin (FOOD00886), Spinach (FOOD00178), Swiss chard (FOOD00237)
DB00121	Biotin	FDB013257	Gingerenone C	DDI type 13	The therapeutic efficacy of Biotin can be decreased when used in combination with Gingerenone C.	0.979569	TRUE	FALSE	Ginger (FOOD00206)
DB00121	Biotin	FDB013522	Fenchol	DDI type 26	The risk or severity of adverse effects can be increased when Fenchol is combined with Biotin.	0.954744	TRUE	TRUE	Sweet basil (FOOD00119), Lime (FOOD00053)
DB00121	Biotin	FDB013612	3-Methylbutyl phenylacetate	DDI type 15	3-Methylbutyl phenylacetate may decrease the excretion rate of Biotin which could result in a higher serum level.	0.988564	TRUE	FALSE	Peppermint (FOOD00113)
DB00121	Biotin	FDB013621	2-Phenylethyl pentanoate	DDI type 15	2-Phenylethyl pentanoate may decrease the excretion rate of Biotin which could result in a higher serum level.	0.99917	TRUE	FALSE	Peppermint (FOOD00113)
DB00121	Biotin	FDB013875	Dimethylmatairesinol	DDI type 26	The risk or severity of adverse effects can be increased when Dimethylmatairesinol is combined with Biotin.	0.999904	TRUE	TRUE	Sesame (FOOD00170)
DB00121	Biotin	FDB013897	Hexanoic acid	DDI type 13	The therapeutic efficacy of Hexanoic acid can be decreased when used in combination with Biotin.	0.979095	FALSE	FALSE	Butterfat (FOOD00760), Butter (FOOD00648), Cream (FOOD00650), Margarine-like spread (FOOD00844), Coconut (FOOD00336), Cheese (FOOD00617), Dried milk (FOOD00689), Processed cheese (FOOD00711), Babassu palm (FOOD00773), Dulce de leche (FOOD00714)
DB00121	Biotin	FDB013897	Hexanoic acid	DDI type 26	The risk or severity of adverse effects can be increased when Hexanoic acid is combined with Biotin.	0.97919	TRUE	TRUE	Butterfat (FOOD00760), Butter (FOOD00648), Cream (FOOD00650), Margarine-like spread (FOOD00844), Coconut (FOOD00336), Cheese (FOOD00617), Dried milk (FOOD00689), Processed cheese (FOOD00711), Babassu palm (FOOD00773), Dulce de leche (FOOD00714)
DB00121	Biotin	FDB014346	Hexanenitrile	DDI type 26	The risk or severity of adverse effects can be increased when Biotin is combined with Hexanenitrile.	0.998101	TRUE	TRUE	Kohlrabi (FOOD00033)
DB00121	Biotin	FDB014346	Hexanenitrile	DDI type 26	The risk or severity of adverse effects can be increased when Hexanenitrile is combined with Biotin.	0.983105	TRUE	TRUE	Kohlrabi (FOOD00033)
DB00121	Biotin	FDB014512	5-Isopropyl-2-methylphenol	DDI type 26	The risk or severity of adverse effects can be increased when 5-Isopropyl-2-methylphenol is combined with Biotin.	0.942743	TRUE	TRUE	Pot marjoram (FOOD00123), Common thyme (FOOD00183), Black walnut (FOOD00093), Sweet marjoram (FOOD00122), Summer savory (FOOD00167), Common oregano (FOOD00124), Corn (FOOD00205), Rosemary (FOOD00159), Hyssop (FOOD00089)
DB00121	Biotin	FDB014582	(R)-Citronellal	DDI type 26	The risk or severity of adverse effects can be increased when (R)-Citronellal is combined with Biotin.	0.967717	TRUE	TRUE	Lemon balm (FOOD00108)
DB00121	Biotin	FDB014617	Citronellal	DDI type 26	The risk or severity of adverse effects can be increased when Citronellal is combined with Biotin.	0.967717	TRUE	TRUE	Lemon balm (FOOD00108), Lime (FOOD00053), Ginger (FOOD00206), Sweet orange (FOOD00057), Mandarin orange (Clementine, Tangerine) (FOOD00056)
DB00121	Biotin	FDB014795	2-Isopropyl-5-methylphenol	DDI type 26	The risk or severity of adverse effects can be increased when 2-Isopropyl-5-methylphenol is combined with Biotin.	0.947819	TRUE	TRUE	Black walnut (FOOD00093), Common thyme (FOOD00183), Common oregano (FOOD00124), Sweet basil (FOOD00119), Pot marjoram (FOOD00123), Mandarin orange (Clementine, Tangerine) (FOOD00056), Spearmint (FOOD00112), Hyssop (FOOD00089)
DB00121	Biotin	FDB014823	Acetylursolic acid	DDI type 15	Acetylursolic acid may decrease the excretion rate of Biotin which could result in a higher serum level.	0.997489	TRUE	FALSE	Rosemary (FOOD00159)
DB00121	Biotin	FDB014940	Linalool	DDI type 26	The risk or severity of adverse effects can be increased when Linalool is combined with Biotin.	0.976165	TRUE	TRUE	Spearmint (FOOD00112), Coriander (FOOD00061), Common thyme (FOOD00183), Cardamom (FOOD00074), Sweet basil (FOOD00119), Orange mint (FOOD00110), Sweet bay (FOOD00097), Common sage (FOOD00165), Turmeric (FOOD00068), Star anise (FOOD00090)
DB00121	Biotin	FDB014942	D-Linalool	DDI type 26	The risk or severity of adverse effects can be increased when D-Linalool is combined with Biotin.	0.976165	TRUE	TRUE	Sweet marjoram (FOOD00122)
DB00121	Biotin	FDB015469	beta-Ionone	DDI type 26	The risk or severity of adverse effects can be increased when Biotin is combined with beta-Ionone.	0.961111	TRUE	TRUE	Corn (FOOD00205), Black tea (FOOD00907), Green tea (FOOD00908), Herbal tea (FOOD00989), Red tea (FOOD00925), Tea (FOOD00038), Carrot (FOOD00245), Wild carrot (FOOD00072), Common oregano (FOOD00124), Hyssop (FOOD00089)
DB00121	Biotin	FDB015552	Sinensetin	DDI type 26	The risk or severity of adverse effects can be increased when Sinensetin is combined with Biotin.	0.982608	TRUE	TRUE	Sweet orange (FOOD00057)
DB00121	Biotin	FDB017346	1,7,7-Trimethyltricyclo[2.2.1.02,6]heptane	DDI type 26	The risk or severity of adverse effects can be increased when 1,7,7-Trimethyltricyclo[2.2.1.02,6]heptane is combined with Biotin.	0.980949	TRUE	TRUE	Ginger (FOOD00206), Common sage (FOOD00165), Pot marjoram (FOOD00123)
DB00121	Biotin	FDB019133	Linalyl acetate	DDI type 26	The risk or severity of adverse effects can be increased when Linalyl acetate is combined with Biotin.	0.940235	TRUE	TRUE	Cardamom (FOOD00074), Common sage (FOOD00165), Common thyme (FOOD00183), Cornmint (FOOD00111), Sweet basil (FOOD00119), Common oregano (FOOD00124), Rosemary (FOOD00159), Sweet marjoram (FOOD00122)
DB00121	Biotin	FDB019140	Pentosan polysulfate	DDI type 26	The risk or severity of adverse effects can be increased when Pentosan polysulfate is combined with Biotin.	0.989622	TRUE	TRUE	Tamarind (FOOD00180), Fig (FOOD00081)
DB00121	Biotin	FDB019886	4-Ethyl-1,2-benzenediol	DDI type 26	The risk or severity of adverse effects can be increased when 4-Ethyl-1,2-benzenediol is combined with Biotin.	0.998836	TRUE	TRUE	Arabica coffee (FOOD00059), Coffee (FOOD00058), Robusta coffee (FOOD00060), Cocoa powder (FOOD00685), Beer (FOOD00268)
DB00121	Biotin	FDB020050	Pentyl formate	DDI type 26	The risk or severity of adverse effects can be increased when Biotin is combined with Pentyl formate.	0.969753	TRUE	TRUE	Milk (Cow) (FOOD00618)
DB00121	Biotin	FDB020053	1,2,3-Trimethoxy-5-methylbenzene	DDI type 15	1,2,3-Trimethoxy-5-methylbenzene may decrease the excretion rate of Biotin which could result in a higher serum level.	0.99944	TRUE	FALSE	Safflower (FOOD00042)
DB00121	Biotin	FDB020161	2-Phenylethyl formate	DDI type 26	The risk or severity of adverse effects can be increased when Biotin is combined with 2-Phenylethyl formate.	0.973026	TRUE	TRUE	Bilberry (FOOD00193)
DB00121	Biotin	FDB020161	2-Phenylethyl formate	DDI type 26	The risk or severity of adverse effects can be increased when 2-Phenylethyl formate is combined with Biotin.	0.990002	TRUE	TRUE	Bilberry (FOOD00193)
DB00121	Biotin	FDB020783	Capsiamide	DDI type 13	The therapeutic efficacy of Capsiamide can be decreased when used in combination with Biotin.	0.978232	FALSE	FALSE	Green bell pepper (FOOD00877), Orange bell pepper (FOOD00879), Pepper (FOOD00040), Red bell pepper (FOOD00880), Yellow bell pepper (FOOD00878), Pepper (C. frutescens) (FOOD00428)
DB00121	Biotin	FDB021782	25-Hydroxycholecalciferol	DDI type 26	The risk or severity of adverse effects can be increased when Biotin is combined with 25-Hydroxycholecalciferol.	0.981967	TRUE	TRUE	Sausage (FOOD00652), Other animal fat (FOOD00682), Domestic pig (FOOD00536), Milk (Cow) (FOOD00618)
DB00121	Biotin	FDB021793	24,25-Dihydroxyvitamin D3	DDI type 26	The risk or severity of adverse effects can be increased when Biotin is combined with 24,25-Dihydroxyvitamin D3.	0.999301	TRUE	TRUE	Haddock (FOOD00374), Gadus (Common cod) (FOOD00515), Salmonidae (Salmon, Trout) (FOOD00493), Lake trout (FOOD00582), Anguilliformes (FOOD00577), Atlantic halibut (FOOD00516), Charr (FOOD00571), Greenland halibut/turbot (FOOD00370), Rainbow trout (FOOD00444), Clupeinae (Herring, Sardine, Sprat) (FOOD00520)
DB00121	Biotin	FDB021812	Aminoadipic acid	DDI type 26	The risk or severity of adverse effects can be increased when Biotin is combined with Aminoadipic acid.	0.997667	TRUE	TRUE	Rye (FOOD00169), Wheat (FOOD00561), Broccoli (FOOD00034), Dill (FOOD00013), Sunburst squash (pattypan squash) (FOOD00874), Swiss chard (FOOD00237), Yellow wax bean (FOOD00882), Green zucchini (FOOD00875), Potato (FOOD00175), Green bean (FOOD00883)
DB00121	Biotin	FDB021812	Aminoadipic acid	DDI type 26	The risk or severity of adverse effects can be increased when Aminoadipic acid is combined with Biotin.	0.985769	TRUE	TRUE	Rye (FOOD00169), Wheat (FOOD00561), Broccoli (FOOD00034), Dill (FOOD00013), Sunburst squash (pattypan squash) (FOOD00874), Swiss chard (FOOD00237), Yellow wax bean (FOOD00882), Green zucchini (FOOD00875), Potato (FOOD00175), Green bean (FOOD00883)
DB00121	Biotin	FDB022621	25-Hydroxyvitamin D2	DDI type 26	The risk or severity of adverse effects can be increased when Biotin is combined with 25-Hydroxyvitamin D2.	0.991021	TRUE	TRUE	Milk (Cow) (FOOD00618)
DB00121	Biotin	FDB023414	Vernolic acid	DDI type 26	The risk or severity of adverse effects can be increased when Vernolic acid is combined with Biotin.	0.976603	TRUE	TRUE	Rice (FOOD00125)
DB00122	Choline	FDB000332	7-Hydroxysecoisolariciresinol	DDI type 15	7-Hydroxysecoisolariciresinol may decrease the excretion rate of Choline which could result in a higher serum level.	0.979841	TRUE	FALSE	Sesame (FOOD00170)
DB00122	Choline	FDB000332	7-Hydroxysecoisolariciresinol	DDI type 26	The risk or severity of adverse effects can be increased when 7-Hydroxysecoisolariciresinol is combined with Choline.	0.94236	TRUE	TRUE	Sesame (FOOD00170)
DB00122	Choline	FDB000446	L-Tyrosine	DDI type 26	The risk or severity of adverse effects can be increased when L-Tyrosine is combined with Choline.	0.996105	TRUE	TRUE	Milk (Cow) (FOOD00618), Casein (FOOD00659), Other soy product (FOOD00271), Beluga whale (FOOD00300), Red bell pepper (FOOD00880), Buttermilk (FOOD00692), Smelt (FOOD00519), Soy bean (FOOD00085), Spirulina (FOOD00480), Dried milk (FOOD00689)
DB00122	Choline	FDB000845	2,6-Dihydroxybenzoic acid	DDI type 15	2,6-Dihydroxybenzoic acid may decrease the excretion rate of Choline which could result in a higher serum level.	0.979681	TRUE	FALSE	Beer (FOOD00268), Olive (FOOD00121)
DB00122	Choline	FDB000846	Vanillic acid	DDI type 15	Vanillic acid may decrease the excretion rate of Choline which could result in a higher serum level.	0.996917	TRUE	FALSE	Coriander (FOOD00061), Garden onion (FOOD00006), Sweet basil (FOOD00119), Olive (FOOD00121), Common oregano (FOOD00124), Horseradish (FOOD00018), Peanut (FOOD00016), Cocoa powder (FOOD00685), Swiss chard (FOOD00237), Yellow wax bean (FOOD00882)
DB00122	Choline	FDB000893	Phenol	DDI type 15	Phenol may decrease the excretion rate of Choline which could result in a higher serum level.	0.999435	TRUE	FALSE	Sweet marjoram (FOOD00122), Arabica coffee (FOOD00059), Coffee (FOOD00058), Robusta coffee (FOOD00060), Safflower (FOOD00042), Cocoa powder (FOOD00685), Highbush blueberry (FOOD00191), Bilberry (FOOD00193)
DB00122	Choline	FDB001022	Ethyl hexadecanoate	DDI type 26	The risk or severity of adverse effects can be increased when Ethyl hexadecanoate is combined with Choline.	0.972629	TRUE	TRUE	Coriander (FOOD00061)
DB00122	Choline	FDB001037	4-Aminobenzoic acid	DDI type 26	The risk or severity of adverse effects can be increased when 4-Aminobenzoic acid is combined with Choline.	0.986831	TRUE	TRUE	Pineapple (FOOD00012)
DB00122	Choline	FDB001066	Nonivamide	DDI type 26	The risk or severity of adverse effects can be increased when Nonivamide is combined with Choline.	0.943821	TRUE	TRUE	Green bell pepper (FOOD00877), Orange bell pepper (FOOD00879), Pepper (FOOD00040), Pepper (C. frutescens) (FOOD00428), Red bell pepper (FOOD00880), Yellow bell pepper (FOOD00878)
DB00122	Choline	FDB001176	Isodulcitol	DDI type 14	The therapeutic efficacy of Isodulcitol can be increased when used in combination with Choline.	0.987693	FALSE	FALSE	Flaxseed (FOOD00101)
DB00122	Choline	FDB001197	Mannan	DDI type 15	Choline may decrease the excretion rate of Mannan which could result in a higher serum level.	0.977481	FALSE	FALSE	Ginkgo nuts (FOOD00367)
DB00122	Choline	FDB001304	alpha1-Sitosterol	DDI type 15	alpha1-Sitosterol may decrease the excretion rate of Choline which could result in a higher serum level.	0.966919	TRUE	FALSE	Evening primrose (FOOD00120)
DB00122	Choline	FDB001304	alpha1-Sitosterol	DDI type 26	The risk or severity of adverse effects can be increased when alpha1-Sitosterol is combined with Choline.	0.987457	TRUE	TRUE	Evening primrose (FOOD00120)
DB00122	Choline	FDB001361	Ostreasterol	DDI type 15	Ostreasterol may decrease the excretion rate of Choline which could result in a higher serum level.	0.995418	TRUE	FALSE	Common walnut (FOOD00094)
DB00122	Choline	FDB001361	Ostreasterol	DDI type 26	The risk or severity of adverse effects can be increased when Ostreasterol is combined with Choline.	0.983646	TRUE	TRUE	Common walnut (FOOD00094)
DB00122	Choline	FDB001512	1,2-Benzenediol	DDI type 15	1,2-Benzenediol may decrease the excretion rate of Choline which could result in a higher serum level.	0.990642	TRUE	FALSE	Arabica coffee (FOOD00059), Coffee (FOOD00058), Robusta coffee (FOOD00060), Cocoa powder (FOOD00685), Beer (FOOD00268)
DB00122	Choline	FDB001532	Betulinic acid	DDI type 15	Betulinic acid may decrease the excretion rate of Choline which could result in a higher serum level.	0.970989	TRUE	FALSE	Winged bean (FOOD00507), Pomegranate (FOOD00151), Java plum (FOOD00386), Common walnut (FOOD00094), Nance (FOOD00788)
DB00122	Choline	FDB001850	Stigmast-7-en-3-ol	DDI type 26	The risk or severity of adverse effects can be increased when Stigmast-7-en-3-ol is combined with Choline.	0.955926	TRUE	TRUE	Common walnut (FOOD00094)
DB00122	Choline	FDB001936	Stigmasterol	DDI type 26	The risk or severity of adverse effects can be increased when Stigmasterol is combined with Choline.	0.987089	TRUE	TRUE	Cherimoya (FOOD00326), Soy bean (FOOD00085), Shortening (FOOD00783), Margarine (FOOD00843), Chocolate (FOOD00687), Flaxseed (FOOD00101), Mung bean (FOOD00200), Sesame (FOOD00170), Turmeric (FOOD00068), Sunflower (FOOD00086)
DB00122	Choline	FDB002100	Caffeine	DDI type 26	The risk or severity of adverse effects can be increased when Caffeine is combined with Choline.	0.994371	TRUE	TRUE	Arabica coffee (FOOD00059), Coffee mocha (FOOD00743), Cocoa bean (FOOD00182), Cocoa powder (FOOD00685), Chocolate (FOOD00687), Coffee (FOOD00058), Robusta coffee (FOOD00060), Liquor (FOOD00616), Black tea (FOOD00907), Green tea (FOOD00908)
DB00122	Choline	FDB002119	6-Propyltridecane	DDI type 26	The risk or severity of adverse effects can be increased when 6-Propyltridecane is combined with Choline.	0.966979	TRUE	TRUE	Black walnut (FOOD00093)
DB00122	Choline	FDB002412	Tangeritin	DDI type 26	The risk or severity of adverse effects can be increased when Tangeritin is combined with Choline.	0.995486	TRUE	TRUE	Sweet orange (FOOD00057)
DB00122	Choline	FDB002590	m-Coumaric acid	DDI type 15	m-Coumaric acid may decrease the excretion rate of Choline which could result in a higher serum level.	0.996206	TRUE	FALSE	Olive (FOOD00121), Corn (FOOD00205), Beer (FOOD00268)
DB00122	Choline	FDB002880	Alliospiroside C	DDI type 9	The serum concentration of Alliospiroside C can be decreased when it is combined with Choline.	0.952996	FALSE	FALSE	Garden onion (FOOD00006)
DB00122	Choline	FDB002934	Nervonic acid	DDI type 1	Nervonic acid can cause a decrease in the absorption of Choline resulting in a reduced serum concentration and potentially a decrease in efficacy.	0.971762	TRUE	FALSE	Scombridae (Bonito, Mackerel, Tuna) (FOOD00586), Anguilliformes (FOOD00577), Remoulade (FOOD00675), Gadus (Common cod) (FOOD00515), Clupeinae (Herring, Sardine, Sprat) (FOOD00520), Salmonidae (Salmon, Trout) (FOOD00493), Rainbow trout (FOOD00444), Flaxseed (FOOD00101)
DB00122	Choline	FDB002951	Elaidic acid	DDI type 26	The risk or severity of adverse effects can be increased when Elaidic acid is combined with Choline.	0.954263	TRUE	TRUE	Pomegranate (FOOD00151), Milk (Cow) (FOOD00618)
DB00122	Choline	FDB002952	Vaccenic acid	DDI type 26	The risk or severity of adverse effects can be increased when Vaccenic acid is combined with Choline.	0.954263	TRUE	TRUE	Other animal fat (FOOD00682), Margarine (FOOD00843), Scombridae (Bonito, Mackerel, Tuna) (FOOD00586), Cattle (Beef, Veal) (FOOD00495), Domestic pig (FOOD00536), Other dish (FOOD00836), Sturgeon (FOOD00570), Clupeinae (Herring, Sardine, Sprat) (FOOD00520), Rainbow trout (FOOD00444), Milk (Cow) (FOOD00618)
DB00122	Choline	FDB003051	Cetyl alcohol	DDI type 26	The risk or severity of adverse effects can be increased when Cetyl alcohol is combined with Choline.	0.9557	TRUE	TRUE	Kohlrabi (FOOD00033)
DB00122	Choline	FDB003654	Ornithine	DDI type 26	The risk or severity of adverse effects can be increased when Choline is combined with Ornithine.	0.986239	TRUE	TRUE	Green zucchini (FOOD00875), Potato (FOOD00175), Garden onion (FOOD00006), Broccoli (FOOD00034), Sunburst squash (pattypan squash) (FOOD00874), Spinach (FOOD00178), Cucumber (FOOD00065), Yellow bell pepper (FOOD00878), Green bell pepper (FOOD00877), Orange bell pepper (FOOD00879)
DB00122	Choline	FDB003693	Salicylates	DDI type 15	Salicylates may decrease the excretion rate of Choline which could result in a higher serum level.	0.994336	TRUE	FALSE	Common thyme (FOOD00183), Turmeric (FOOD00068), Peppermint (FOOD00113), Rosemary (FOOD00159), Mandarin orange (Clementine, Tangerine) (FOOD00056), Colorado pinyon (FOOD00433), Common walnut (FOOD00094), Pomegranate (FOOD00151)
DB00122	Choline	FDB003771	Gadoleic acid	DDI type 26	The risk or severity of adverse effects can be increased when Gadoleic acid is combined with Choline.	0.945543	TRUE	TRUE	Fish oil (FOOD00990), Other fish product (FOOD00665), Lumpsucker (FOOD00585), White mustard (FOOD00413), Greenland halibut/turbot (FOOD00370), Scombridae (Bonito, Mackerel, Tuna) (FOOD00586), Gadus (Common cod) (FOOD00515), Anguilliformes (FOOD00577), Rape (FOOD00029), Colorado pinyon (FOOD00433)
DB00122	Choline	FDB004105	1-Heptadecene	DDI type 26	The risk or severity of adverse effects can be increased when 1-Heptadecene is combined with Choline.	0.956856	TRUE	TRUE	Safflower (FOOD00042)
DB00122	Choline	FDB004212	delta-5-Avenasterol	DDI type 15	delta-5-Avenasterol may decrease the excretion rate of Choline which could result in a higher serum level.	0.996322	TRUE	FALSE	Common walnut (FOOD00094)
DB00122	Choline	FDB004212	delta-5-Avenasterol	DDI type 26	The risk or severity of adverse effects can be increased when delta-5-Avenasterol is combined with Choline.	0.974537	TRUE	TRUE	Common walnut (FOOD00094)
DB00122	Choline	FDB004234	Melatonin	DDI type 26	The risk or severity of adverse effects can be increased when Melatonin is combined with Choline.	0.999766	TRUE	TRUE	Corn (FOOD00205)
DB00122	Choline	FDB004676	Heptadecanoic acid	DDI type 26	The risk or severity of adverse effects can be increased when Heptadecanoic acid is combined with Choline.	0.987379	TRUE	TRUE	Cinnamon (FOOD00572), Cattle (Beef, Veal) (FOOD00495), Sturgeon (FOOD00570), Crab (FOOD00573), Sausage (FOOD00652), Rabbit (FOOD00528), Cashew nut (FOOD00011), Oyster mushroom (FOOD00553), Clawed lobster (FOOD00584), Atlantic halibut (FOOD00516)
DB00122	Choline	FDB004683	Obtusifoliol	DDI type 26	The risk or severity of adverse effects can be increased when Obtusifoliol is combined with Choline.	0.990939	TRUE	TRUE	Evening primrose (FOOD00120)
DB00122	Choline	FDB004727	N-Eicosane	DDI type 26	The risk or severity of adverse effects can be increased when N-Eicosane is combined with Choline.	0.94104	TRUE	TRUE	Lemon balm (FOOD00108)
DB00122	Choline	FDB004728	N-Heneicosane	DDI type 26	The risk or severity of adverse effects can be increased when N-Heneicosane is combined with Choline.	0.943438	TRUE	TRUE	Black elderberry (FOOD00166), Common oregano (FOOD00124), Lemon balm (FOOD00108)
DB00122	Choline	FDB004731	N-Tetradecane	DDI type 26	The risk or severity of adverse effects can be increased when N-Tetradecane is combined with Choline.	0.985249	TRUE	TRUE	Black walnut (FOOD00093)
DB00122	Choline	FDB004763	Ethyl benzene	DDI type 15	Choline may decrease the excretion rate of Ethyl benzene which could result in a higher serum level.	0.996139	FALSE	FALSE	Black walnut (FOOD00093), Safflower (FOOD00042)
DB00122	Choline	FDB005197	Ethyl pentadecanoate	DDI type 26	The risk or severity of adverse effects can be increased when Ethyl pentadecanoate is combined with Choline.	0.980492	TRUE	TRUE	Coriander (FOOD00061)
DB00122	Choline	FDB005482	Glycosides	DDI type 9	The serum concentration of Glycosides can be decreased when it is combined with Choline.	0.944168	FALSE	FALSE	Apricot (FOOD00144), Fig (FOOD00081)
DB00122	Choline	FDB005827	3-Methyltridecane	DDI type 26	The risk or severity of adverse effects can be increased when 3-Methyltridecane is combined with Choline.	0.980148	TRUE	TRUE	Black walnut (FOOD00093)
DB00122	Choline	FDB006365	alpha,alpha-Dimethylbenzyl alcohol	DDI type 15	Choline may decrease the excretion rate of alpha,alpha-Dimethylbenzyl alcohol which could result in a higher serum level.	0.998129	FALSE	FALSE	Pot marjoram (FOOD00123)
DB00122	Choline	FDB007854	Alliospiroside A	DDI type 9	The serum concentration of Alliospiroside A can be decreased when it is combined with Choline.	0.958884	FALSE	FALSE	Garden onion (FOOD00006)
DB00122	Choline	FDB008739	Benzoic acid	DDI type 15	Benzoic acid may decrease the excretion rate of Choline which could result in a higher serum level.	0.999554	TRUE	FALSE	American cranberry (FOOD00192), Italian sweet red pepper (FOOD00881), Garden onion (FOOD00006), Dill (FOOD00013), Broccoli (FOOD00034), Parsnip (FOOD00129), Green zucchini (FOOD00875), Cocoa powder (FOOD00685), Milk (Cow) (FOOD00618), Cucumber (FOOD00065)
DB00122	Choline	FDB008754	Hydroxytyrosol	DDI type 10	The serum concentration of Hydroxytyrosol can be increased when it is combined with Choline.	0.953741	FALSE	FALSE	Olive (FOOD00121), Grape wine (FOOD00612)
DB00122	Choline	FDB009636	Isoborneol	DDI type 10	The serum concentration of Isoborneol can be increased when it is combined with Choline.	0.954513	FALSE	FALSE	Common sage (FOOD00165), Turmeric (FOOD00068), Rosemary (FOOD00159), Common oregano (FOOD00124)
DB00122	Choline	FDB010039	Pentylamine	DDI type 26	The risk or severity of adverse effects can be increased when Choline is combined with Pentylamine.	0.996102	TRUE	TRUE	Green bell pepper (FOOD00877), Orange bell pepper (FOOD00879), Pepper (FOOD00040), Red bell pepper (FOOD00880), Yellow bell pepper (FOOD00878), Cabbage (FOOD00851), White cabbage (FOOD00887), Apple (FOOD00105)
DB00122	Choline	FDB010039	Pentylamine	DDI type 26	The risk or severity of adverse effects can be increased when Pentylamine is combined with Choline.	0.983622	TRUE	TRUE	Green bell pepper (FOOD00877), Orange bell pepper (FOOD00879), Pepper (FOOD00040), Red bell pepper (FOOD00880), Yellow bell pepper (FOOD00878), Cabbage (FOOD00851), White cabbage (FOOD00887), Apple (FOOD00105)
DB00122	Choline	FDB010504	4-Hydroxybenzaldehyde	DDI type 15	4-Hydroxybenzaldehyde may decrease the excretion rate of Choline which could result in a higher serum level.	0.997965	TRUE	FALSE	Vinegar (FOOD00628), Oat (FOOD00022)
DB00122	Choline	FDB010507	3-Hydroxybenzoic acid	DDI type 15	3-Hydroxybenzoic acid may decrease the excretion rate of Choline which could result in a higher serum level.	0.99282	TRUE	FALSE	American cranberry (FOOD00192), Beer (FOOD00268)
DB00122	Choline	FDB010508	4-Hydroxybenzoic acid	DDI type 15	4-Hydroxybenzoic acid may decrease the excretion rate of Choline which could result in a higher serum level.	0.985478	TRUE	FALSE	Red huckleberry (FOOD00223), Rabbiteye blueberry (FOOD00898), Coriander (FOOD00061), Garden onion (FOOD00006), Loquat (FOOD00076), Highbush blueberry (FOOD00191), Olive (FOOD00121), Strawberry (FOOD00083), Swiss chard (FOOD00237), Carrot (FOOD00245)
DB00122	Choline	FDB010527	Zingerone	DDI type 15	Zingerone may decrease the excretion rate of Choline which could result in a higher serum level.	0.999844	TRUE	FALSE	Pot marjoram (FOOD00123), Ginger (FOOD00206)
DB00122	Choline	FDB010539	2-Vinylphenol	DDI type 15	2-Vinylphenol may decrease the excretion rate of Choline which could result in a higher serum level.	0.999784	TRUE	FALSE	Ceylon cinnamon (FOOD00051)
DB00122	Choline	FDB010560	Ethyl phenylacetate	DDI type 15	Choline may decrease the excretion rate of Ethyl phenylacetate which could result in a higher serum level.	0.998047	FALSE	FALSE	Corn (FOOD00205)
DB00122	Choline	FDB010563	1-Phenylethyl acetate	DDI type 15	Choline may decrease the excretion rate of 1-Phenylethyl acetate which could result in a higher serum level.	0.998149	FALSE	FALSE	Cloves (FOOD00179)
DB00122	Choline	FDB010581	N-Methylphenethylamine	DDI type 15	Choline may decrease the excretion rate of N-Methylphenethylamine which could result in a higher serum level.	0.947191	FALSE	FALSE	Cabbage (FOOD00851), White cabbage (FOOD00887), Carrot (FOOD00245), Wild carrot (FOOD00072), Apple (FOOD00105), Corn (FOOD00205)
DB00122	Choline	FDB010583	Octopamine	DDI type 10	The serum concentration of Octopamine can be increased when it is combined with Choline.	0.978531	FALSE	FALSE	Mandarin orange (Clementine, Tangerine) (FOOD00056), Sweet orange (FOOD00057)
DB00122	Choline	FDB010873	1-(4-Methoxyphenyl)-2-propanone	DDI type 15	1-(4-Methoxyphenyl)-2-propanone may decrease the excretion rate of Choline which could result in a higher serum level.	0.99992	TRUE	FALSE	Anise (FOOD00137)
DB00122	Choline	FDB011258	o-Coumaric acid	DDI type 15	o-Coumaric acid may decrease the excretion rate of Choline which could result in a higher serum level.	0.998554	TRUE	FALSE	Corn (FOOD00205), Hard wheat (FOOD00242), Olive (FOOD00121), American cranberry (FOOD00192), Fennel (FOOD00082), Date (FOOD00135), Peanut (FOOD00016), Common wheat (FOOD00187), Beer (FOOD00268), Grape wine (FOOD00612)
DB00122	Choline	FDB011417	3-Phenylpropyl acetate	DDI type 15	Choline may decrease the excretion rate of 3-Phenylpropyl acetate which could result in a higher serum level.	0.982777	FALSE	FALSE	Ceylon cinnamon (FOOD00051)
DB00122	Choline	FDB011546	24-Methylenelophenol	DDI type 15	24-Methylenelophenol may decrease the excretion rate of Choline which could result in a higher serum level.	0.946363	TRUE	FALSE	Evening primrose (FOOD00120)
DB00122	Choline	FDB011546	24-Methylenelophenol	DDI type 26	The risk or severity of adverse effects can be increased when 24-Methylenelophenol is combined with Choline.	0.993457	TRUE	TRUE	Evening primrose (FOOD00120)
DB00122	Choline	FDB011835	3-Phenylpropanal	DDI type 15	Choline may decrease the excretion rate of 3-Phenylpropanal which could result in a higher serum level.	0.986585	FALSE	FALSE	Ceylon cinnamon (FOOD00051)
DB00122	Choline	FDB011952	Hexadecane	DDI type 26	The risk or severity of adverse effects can be increased when Hexadecane is combined with Choline.	0.981089	TRUE	TRUE	Black walnut (FOOD00093)
DB00122	Choline	FDB012060	3,4-Dihydroxybenzaldehyde	DDI type 15	3,4-Dihydroxybenzaldehyde may decrease the excretion rate of Choline which could result in a higher serum level.	0.993472	TRUE	FALSE	Vinegar (FOOD00628), Grape wine (FOOD00612)
DB00122	Choline	FDB012122	Cholestanol	DDI type 15	Cholestanol may decrease the excretion rate of Choline which could result in a higher serum level.	0.966905	TRUE	FALSE	Common walnut (FOOD00094)
DB00122	Choline	FDB012152	2-Phenylethanol	DDI type 15	Choline may decrease the excretion rate of 2-Phenylethanol which could result in a higher serum level.	0.998988	FALSE	FALSE	Black walnut (FOOD00093), Sweet basil (FOOD00119), Ceylon cinnamon (FOOD00051), Peppermint (FOOD00113), Highbush blueberry (FOOD00191), Bilberry (FOOD00193)
DB00122	Choline	FDB012153	2-Phenylethyl acetate	DDI type 15	Choline may decrease the excretion rate of 2-Phenylethyl acetate which could result in a higher serum level.	0.998038	FALSE	FALSE	Ceylon cinnamon (FOOD00051), Cloves (FOOD00179)
DB00122	Choline	FDB012158	Serotonin	DDI type 26	The risk or severity of adverse effects can be increased when Serotonin is combined with Choline.	0.999822	TRUE	TRUE	Sea-buckthornberry (FOOD00087), Common walnut (FOOD00094), Oat (FOOD00022), Swiss chard (FOOD00237), Pineapple (FOOD00012), Nanking cherry (FOOD00885), Barley (FOOD00088), Rye (FOOD00169), Pomegranate (FOOD00151), Date (FOOD00135)
DB00122	Choline	FDB012163	Dopamine	DDI type 10	The serum concentration of Dopamine can be increased when it is combined with Choline.	0.998506	FALSE	FALSE	Swiss chard (FOOD00237), Oat (FOOD00022), Red beetroot (FOOD00264), Rye (FOOD00169), Wheat (FOOD00561), Barley (FOOD00088), Red raspberry (FOOD00162), Dill (FOOD00013), Yellow wax bean (FOOD00882), Green zucchini (FOOD00875)
DB00122	Choline	FDB012171	Eugenol	DDI type 15	Eugenol may decrease the excretion rate of Choline which could result in a higher serum level.	0.999784	TRUE	FALSE	Cloves (FOOD00179), Allspice (FOOD00287), Carrot (FOOD00245), Wild carrot (FOOD00072), Sweet basil (FOOD00119), Turmeric (FOOD00068), Ceylon cinnamon (FOOD00051), Sweet marjoram (FOOD00122), Sweet bay (FOOD00097), Hyssop (FOOD00089)
DB00122	Choline	FDB012188	3-Phenyl-1-propanol	DDI type 15	Choline may decrease the excretion rate of 3-Phenyl-1-propanol which could result in a higher serum level.	0.991726	FALSE	FALSE	Bilberry (FOOD00193)
DB00122	Choline	FDB012200	2,3-Dihydroxybenzoic acid	DDI type 15	2,3-Dihydroxybenzoic acid may decrease the excretion rate of Choline which could result in a higher serum level.	0.966854	TRUE	FALSE	Cucumber (FOOD00065), Broccoli (FOOD00034), Dill (FOOD00013), Romaine lettuce (FOOD00888), Yellow wax bean (FOOD00882), Garden onion (FOOD00006), Carrot (FOOD00245), Yellow bell pepper (FOOD00878), American cranberry (FOOD00192), Italian sweet red pepper (FOOD00881)
DB00122	Choline	FDB012268	Isopropylbenzene	DDI type 15	Choline may decrease the excretion rate of Isopropylbenzene which could result in a higher serum level.	0.985424	FALSE	FALSE	Ceylon cinnamon (FOOD00051), Ginger (FOOD00206)
DB00122	Choline	FDB012435	Ethyl tetradecanoate	DDI type 26	The risk or severity of adverse effects can be increased when Ethyl tetradecanoate is combined with Choline.	0.981966	TRUE	TRUE	Coriander (FOOD00061)
DB00122	Choline	FDB012441	Ethyl stearate	DDI type 26	The risk or severity of adverse effects can be increased when Ethyl stearate is combined with Choline.	0.965588	TRUE	TRUE	Coriander (FOOD00061)
DB00122	Choline	FDB012456	2-Hydroxybenzaldehyde	DDI type 15	2-Hydroxybenzaldehyde may decrease the excretion rate of Choline which could result in a higher serum level.	0.999398	TRUE	FALSE	Peppermint (FOOD00113)
DB00122	Choline	FDB012459	Methyl salicylate	DDI type 15	Methyl salicylate may decrease the excretion rate of Choline which could result in a higher serum level.	0.999332	TRUE	FALSE	Hyssop (FOOD00089), Bilberry (FOOD00193)
DB00122	Choline	FDB012496	Brassicasterol	DDI type 26	The risk or severity of adverse effects can be increased when Brassicasterol is combined with Choline.	0.996024	TRUE	TRUE	Common walnut (FOOD00094)
DB00122	Choline	FDB012521	Campesterol	DDI type 26	The risk or severity of adverse effects can be increased when Campesterol is combined with Choline.	0.946425	TRUE	TRUE	Canola (FOOD00772), Cherimoya (FOOD00326), Flaxseed (FOOD00101), Margarine (FOOD00843), Soy bean (FOOD00085), Sesame (FOOD00170), Shortening (FOOD00783), Opium poppy (FOOD00438), Common buckwheat (FOOD00079), Sunflower (FOOD00086)
DB00122	Choline	FDB012569	Gondoic acid	DDI type 26	The risk or severity of adverse effects can be increased when Gondoic acid is combined with Choline.	0.945543	TRUE	TRUE	Macadamia nut (FOOD00525)
DB00122	Choline	FDB012612	Ergosterol	DDI type 26	The risk or severity of adverse effects can be increased when Ergosterol is combined with Choline.	0.998215	TRUE	TRUE	Common wheat (FOOD00187)
DB00122	Choline	FDB012647	N-Methylbenzylamine	DDI type 15	Choline may decrease the excretion rate of N-Methylbenzylamine which could result in a higher serum level.	0.973565	FALSE	FALSE	Carrot (FOOD00245), Wild carrot (FOOD00072)
DB00122	Choline	FDB012660	Secoisolariciresinol	DDI type 15	Secoisolariciresinol may decrease the excretion rate of Choline which could result in a higher serum level.	0.98299	TRUE	FALSE	Flaxseed (FOOD00101), Rye bread (FOOD00809), Asparagus (FOOD00021), Common buckwheat (FOOD00079), Kiwi (FOOD00004), Sesame (FOOD00170), Sunflower (FOOD00086), Soy bean (FOOD00085), Rye (FOOD00169), Black tea (FOOD00907)
DB00122	Choline	FDB012660	Secoisolariciresinol	DDI type 26	The risk or severity of adverse effects can be increased when Secoisolariciresinol is combined with Choline.	0.99808	TRUE	TRUE	Flaxseed (FOOD00101), Rye bread (FOOD00809), Asparagus (FOOD00021), Common buckwheat (FOOD00079), Kiwi (FOOD00004), Sesame (FOOD00170), Sunflower (FOOD00086), Soy bean (FOOD00085), Rye (FOOD00169), Black tea (FOOD00907)
DB00122	Choline	FDB012732	Vitamin D3	DDI type 26	The risk or severity of adverse effects can be increased when Vitamin D3 is combined with Choline.	0.992282	TRUE	TRUE	Common carp (FOOD00322), Lake trout (FOOD00582), Chinook salmon (FOOD00454), Atlantic mackerel (FOOD00293), Swordfish (FOOD00487), Cisco (FOOD00334), Greater sturgeon (FOOD00483), Sockeye salmon (FOOD00453), Rainbow trout (FOOD00444), Pink salmon (FOOD00450)
DB00122	Choline	FDB012733	delta7-Avenasterol	DDI type 15	delta7-Avenasterol may decrease the excretion rate of Choline which could result in a higher serum level.	0.977153	TRUE	FALSE	Common walnut (FOOD00094)
DB00122	Choline	FDB012733	delta7-Avenasterol	DDI type 26	The risk or severity of adverse effects can be increased when delta7-Avenasterol is combined with Choline.	0.986197	TRUE	TRUE	Common walnut (FOOD00094)
DB00122	Choline	FDB012765	Petroselinic acid	DDI type 26	The risk or severity of adverse effects can be increased when Petroselinic acid is combined with Choline.	0.954263	TRUE	TRUE	Parsley (FOOD00131), Carrot (FOOD00245), Wild carrot (FOOD00072), Anise (FOOD00137), Parsnip (FOOD00129), Coriander (FOOD00061), Chervil (FOOD00327), Caraway (FOOD00043)
DB00122	Choline	FDB012798	Estrone	DDI type 15	Estrone may decrease the excretion rate of Choline which could result in a higher serum level.	0.943659	TRUE	FALSE	Pomegranate (FOOD00151), Apple (FOOD00105)
DB00122	Choline	FDB012811	Ergocalciferol	DDI type 26	The risk or severity of adverse effects can be increased when Ergocalciferol is combined with Choline.	0.997635	TRUE	TRUE	Maitake (FOOD00555), Morchella (Morel) (FOOD00731), Shiitake (FOOD00548), Other beverage (FOOD00667), Enokitake (FOOD00551), Milk (Cow) (FOOD00618)
DB00122	Choline	FDB012844	Benzyl benzoate	DDI type 15	Benzyl benzoate may decrease the excretion rate of Choline which could result in a higher serum level.	0.99975	TRUE	FALSE	Ceylon cinnamon (FOOD00051)
DB00122	Choline	FDB012858	Oleic acid	DDI type 26	The risk or severity of adverse effects can be increased when Oleic acid is combined with Choline.	0.954263	TRUE	TRUE	Rape (FOOD00029), Common hazelnut (FOOD00062), Macadamia nut (FOOD00525), Pecan nut (FOOD00044), Other animal fat (FOOD00682), Lard (FOOD00681), Hazelnut (FOOD00376), Tallow (FOOD00674), Safflower (FOOD00042), Cocoa butter (FOOD00684)
DB00122	Choline	FDB012991	Pristane	DDI type 26	The risk or severity of adverse effects can be increased when Pristane is combined with Choline.	0.980435	TRUE	TRUE	Common sage (FOOD00165)
DB00122	Choline	FDB013245	(±)-Phenylalanine	DDI type 26	The risk or severity of adverse effects can be increased when (±)-Phenylalanine is combined with Choline.	0.997745	TRUE	TRUE	Red bell pepper (FOOD00880), Wheat (FOOD00561), Oat (FOOD00022), Barley (FOOD00088), Rye (FOOD00169), Dill (FOOD00013), Broccoli (FOOD00034), Japanese pumpkin (FOOD00886), Spinach (FOOD00178), Swiss chard (FOOD00237)
DB00122	Choline	FDB013257	Gingerenone C	DDI type 15	Gingerenone C may decrease the excretion rate of Choline which could result in a higher serum level.	0.997478	TRUE	FALSE	Ginger (FOOD00206)
DB00122	Choline	FDB013269	Cholesterol	DDI type 15	Cholesterol may decrease the excretion rate of Choline which could result in a higher serum level.	0.983347	TRUE	FALSE	Eggs (FOOD00619), Fish oil (FOOD00990), Sturgeon (FOOD00570), Haddock (FOOD00374), Butter (FOOD00648), Anatidae (FOOD00576), Crayfish (FOOD00534), Clawed lobster (FOOD00584), Other fish product (FOOD00665), Tallow (FOOD00674)
DB00122	Choline	FDB013522	Fenchol	DDI type 10	The serum concentration of Fenchol can be increased when it is combined with Choline.	0.952911	FALSE	FALSE	Sweet basil (FOOD00119), Lime (FOOD00053)
DB00122	Choline	FDB013574	(±)-Borneol	DDI type 10	The serum concentration of (±)-Borneol can be increased when it is combined with Choline.	0.954513	FALSE	FALSE	Common sage (FOOD00165), Cardamom (FOOD00074), Rosemary (FOOD00159), Pot marjoram (FOOD00123), Common thyme (FOOD00183), Spearmint (FOOD00112), Common oregano (FOOD00124), Lime (FOOD00053), Coriander (FOOD00061), Ceylon cinnamon (FOOD00051)
DB00122	Choline	FDB013612	3-Methylbutyl phenylacetate	DDI type 15	3-Methylbutyl phenylacetate may decrease the excretion rate of Choline which could result in a higher serum level.	0.999781	TRUE	FALSE	Peppermint (FOOD00113)
DB00122	Choline	FDB013612	3-Methylbutyl phenylacetate	DDI type 15	Choline may decrease the excretion rate of 3-Methylbutyl phenylacetate which could result in a higher serum level.	0.988127	FALSE	FALSE	Peppermint (FOOD00113)
DB00122	Choline	FDB013621	2-Phenylethyl pentanoate	DDI type 15	2-Phenylethyl pentanoate may decrease the excretion rate of Choline which could result in a higher serum level.	0.999881	TRUE	FALSE	Peppermint (FOOD00113)
DB00122	Choline	FDB013621	2-Phenylethyl pentanoate	DDI type 15	Choline may decrease the excretion rate of 2-Phenylethyl pentanoate which could result in a higher serum level.	0.990296	FALSE	FALSE	Peppermint (FOOD00113)
DB00122	Choline	FDB013868	4-Isopropyl-2-methoxy-1-methylbenzene	DDI type 26	The risk or severity of adverse effects can be increased when 4-Isopropyl-2-methoxy-1-methylbenzene is combined with Choline.	0.992254	TRUE	TRUE	Pot marjoram (FOOD00123)
DB00122	Choline	FDB013875	Dimethylmatairesinol	DDI type 26	The risk or severity of adverse effects can be increased when Dimethylmatairesinol is combined with Choline.	0.999943	TRUE	TRUE	Sesame (FOOD00170)
DB00122	Choline	FDB014580	(+)-Borneol	DDI type 10	The serum concentration of (+)-Borneol can be increased when it is combined with Choline.	0.954513	FALSE	FALSE	Nutmeg (FOOD00118), Ginger (FOOD00206)
DB00122	Choline	FDB014796	2-Isopropyl-5-methylphenol acetate	DDI type 26	The risk or severity of adverse effects can be increased when 2-Isopropyl-5-methylphenol acetate is combined with Choline.	0.985299	TRUE	TRUE	Pot marjoram (FOOD00123)
DB00122	Choline	FDB014797	Thymol methyl ether	DDI type 26	The risk or severity of adverse effects can be increased when Thymol methyl ether is combined with Choline.	0.991333	TRUE	TRUE	Common thyme (FOOD00183), Common oregano (FOOD00124), Mandarin orange (Clementine, Tangerine) (FOOD00056), Lime (FOOD00053), Sweet basil (FOOD00119)
DB00122	Choline	FDB014823	Acetylursolic acid	DDI type 15	Acetylursolic acid may decrease the excretion rate of Choline which could result in a higher serum level.	0.981753	TRUE	FALSE	Rosemary (FOOD00159)
DB00122	Choline	FDB014823	Acetylursolic acid	DDI type 26	The risk or severity of adverse effects can be increased when Acetylursolic acid is combined with Choline.	0.978085	TRUE	TRUE	Rosemary (FOOD00159)
DB00122	Choline	FDB015201	Homodihydrocapsaicin	DDI type 26	The risk or severity of adverse effects can be increased when Homodihydrocapsaicin is combined with Choline.	0.969292	TRUE	TRUE	Green bell pepper (FOOD00877), Orange bell pepper (FOOD00879), Pepper (FOOD00040), Pepper (C. frutescens) (FOOD00428), Red bell pepper (FOOD00880), Yellow bell pepper (FOOD00878)
DB00122	Choline	FDB015503	Cycloartenol	DDI type 15	Cycloartenol may decrease the excretion rate of Choline which could result in a higher serum level.	0.995227	TRUE	FALSE	Evening primrose (FOOD00120)
DB00122	Choline	FDB015503	Cycloartenol	DDI type 26	The risk or severity of adverse effects can be increased when Cycloartenol is combined with Choline.	0.992128	TRUE	TRUE	Evening primrose (FOOD00120)
DB00122	Choline	FDB015552	Sinensetin	DDI type 26	The risk or severity of adverse effects can be increased when Sinensetin is combined with Choline.	0.997674	TRUE	TRUE	Sweet orange (FOOD00057)
DB00122	Choline	FDB016033	1-Isopropyl-3-methylbenzene	DDI type 26	The risk or severity of adverse effects can be increased when 1-Isopropyl-3-methylbenzene is combined with Choline.	0.968777	TRUE	TRUE	Sweet basil (FOOD00119), Blackcurrant (FOOD00155)
DB00122	Choline	FDB017358	1-Isopropyl-4-methylbenzene	DDI type 26	The risk or severity of adverse effects can be increased when 1-Isopropyl-4-methylbenzene is combined with Choline.	0.978789	TRUE	TRUE	Cardamom (FOOD00074), Common thyme (FOOD00183), Cumin (FOOD00067), Summer savory (FOOD00167), Dill (FOOD00013), Common oregano (FOOD00124), Turmeric (FOOD00068), Cornmint (FOOD00111), Pot marjoram (FOOD00123), Ginger (FOOD00206)
DB00122	Choline	FDB019887	4-Ethyl-2-methoxyphenol	DDI type 26	The risk or severity of adverse effects can be increased when 4-Ethyl-2-methoxyphenol is combined with Choline.	0.984146	TRUE	TRUE	Arabica coffee (FOOD00059), Coffee (FOOD00058), Robusta coffee (FOOD00060)
DB00122	Choline	FDB020053	1,2,3-Trimethoxy-5-methylbenzene	DDI type 15	1,2,3-Trimethoxy-5-methylbenzene may decrease the excretion rate of Choline which could result in a higher serum level.	0.999955	TRUE	FALSE	Safflower (FOOD00042)
DB00122	Choline	FDB020053	1,2,3-Trimethoxy-5-methylbenzene	DDI type 26	The risk or severity of adverse effects can be increased when 1,2,3-Trimethoxy-5-methylbenzene is combined with Choline.	0.961103	TRUE	TRUE	Safflower (FOOD00042)
DB00122	Choline	FDB021586	Vitamin D	DDI type 26	The risk or severity of adverse effects can be increased when Vitamin D is combined with Choline.	0.992282	TRUE	TRUE	Haddock (FOOD00374), Gadus (Common cod) (FOOD00515), Maitake (FOOD00555), Common carp (FOOD00322), Lake trout (FOOD00582), Anguilliformes (FOOD00577), Rainbow trout (FOOD00444), Atlantic mackerel (FOOD00293), Salmonidae (Salmon, Trout) (FOOD00493), Swordfish (FOOD00487)
DB00122	Choline	FDB021621	C18:1, n-9	DDI type 26	The risk or severity of adverse effects can be increased when C18:1, n-9 is combined with Choline.	0.954263	TRUE	TRUE	Rape (FOOD00029), Olive (FOOD00121), Safflower (FOOD00042), Pecan nut (FOOD00044), Other animal fat (FOOD00682), Lard (FOOD00681), Hazelnut (FOOD00376), Tallow (FOOD00674), Cocoa butter (FOOD00684), Peanut (FOOD00016)
DB00122	Choline	FDB021782	25-Hydroxycholecalciferol	DDI type 26	The risk or severity of adverse effects can be increased when 25-Hydroxycholecalciferol is combined with Choline.	0.995728	TRUE	TRUE	Sausage (FOOD00652), Other animal fat (FOOD00682), Domestic pig (FOOD00536), Milk (Cow) (FOOD00618)
DB00122	Choline	FDB021793	24,25-Dihydroxyvitamin D3	DDI type 26	The risk or severity of adverse effects can be increased when 24,25-Dihydroxyvitamin D3 is combined with Choline.	0.992654	TRUE	TRUE	Haddock (FOOD00374), Gadus (Common cod) (FOOD00515), Salmonidae (Salmon, Trout) (FOOD00493), Lake trout (FOOD00582), Anguilliformes (FOOD00577), Atlantic halibut (FOOD00516), Charr (FOOD00571), Greenland halibut/turbot (FOOD00370), Rainbow trout (FOOD00444), Clupeinae (Herring, Sardine, Sprat) (FOOD00520)
DB00122	Choline	FDB022621	25-Hydroxyvitamin D2	DDI type 26	The risk or severity of adverse effects can be increased when 25-Hydroxyvitamin D2 is combined with Choline.	0.997378	TRUE	TRUE	Milk (Cow) (FOOD00618)
DB00125	Arginine	FDB000332	7-Hydroxysecoisolariciresinol	DDI type 26	The risk or severity of adverse effects can be increased when Arginine is combined with 7-Hydroxysecoisolariciresinol.	0.97403	TRUE	TRUE	Sesame (FOOD00170)
DB00125	Arginine	FDB000344	Hydroxytyrosol acetate	DDI type 26	The risk or severity of adverse effects can be increased when Arginine is combined with Hydroxytyrosol acetate.	0.994858	TRUE	TRUE	Olive (FOOD00121)
DB00125	Arginine	FDB000357	3-Methylcatechol	DDI type 26	The risk or severity of adverse effects can be increased when Arginine is combined with 3-Methylcatechol.	0.996638	TRUE	TRUE	Arabica coffee (FOOD00059), Coffee (FOOD00058), Robusta coffee (FOOD00060), Cocoa powder (FOOD00685), Beer (FOOD00268)
DB00125	Arginine	FDB000435	N-Methyltyramine	DDI type 26	The risk or severity of adverse effects can be increased when Arginine is combined with N-Methyltyramine.	0.972858	TRUE	TRUE	Barley (FOOD00088)
DB00125	Arginine	FDB000435	N-Methyltyramine	DDI type 13	The therapeutic efficacy of Arginine can be decreased when used in combination with N-Methyltyramine.	0.964035	TRUE	FALSE	Barley (FOOD00088)
DB00125	Arginine	FDB000446	L-Tyrosine	DDI type 78	Arginine may increase the sedative activities of L-Tyrosine.	0.995557	FALSE	FALSE	Milk (Cow) (FOOD00618), Casein (FOOD00659), Other soy product (FOOD00271), Beluga whale (FOOD00300), Red bell pepper (FOOD00880), Buttermilk (FOOD00692), Smelt (FOOD00519), Soy bean (FOOD00085), Spirulina (FOOD00480), Dried milk (FOOD00689)
DB00125	Arginine	FDB000446	L-Tyrosine	DDI type 26	The risk or severity of adverse effects can be increased when L-Tyrosine is combined with Arginine.	0.999958	TRUE	TRUE	Milk (Cow) (FOOD00618), Casein (FOOD00659), Other soy product (FOOD00271), Beluga whale (FOOD00300), Red bell pepper (FOOD00880), Buttermilk (FOOD00692), Smelt (FOOD00519), Soy bean (FOOD00085), Spirulina (FOOD00480), Dried milk (FOOD00689)
DB00125	Arginine	FDB000474	L-Lysine	DDI type 26	The risk or severity of adverse effects can be increased when Arginine is combined with L-Lysine.	0.994503	TRUE	TRUE	Milk (Cow) (FOOD00618), Beluga whale (FOOD00300), Red bell pepper (FOOD00880), Casein (FOOD00659), Bearded seal (FOOD00466), Gelatin (FOOD00663), Smelt (FOOD00519), Gelatin dessert (FOOD00725), Other soy product (FOOD00271), Whitefish (FOOD00503)
DB00125	Arginine	FDB000558	Alliin	DDI type 26	The risk or severity of adverse effects can be increased when Arginine is combined with Alliin.	0.986362	TRUE	TRUE	Soft-necked garlic (FOOD00850)
DB00125	Arginine	FDB000558	Alliin	DDI type 26	The risk or severity of adverse effects can be increased when Alliin is combined with Arginine.	0.998374	TRUE	TRUE	Soft-necked garlic (FOOD00850)
DB00125	Arginine	FDB000567	L-DOPA	DDI type 26	The risk or severity of adverse effects can be increased when Arginine is combined with L-DOPA.	0.999297	TRUE	TRUE	Broad bean (FOOD00197), Swiss chard (FOOD00237), Yellow wax bean (FOOD00882), Spinach (FOOD00178), Green bean (FOOD00883), Red beetroot (FOOD00264), Broccoli (FOOD00034), Dill (FOOD00013), Orange bell pepper (FOOD00879), Yellow zucchini (FOOD00876)
DB00125	Arginine	FDB000567	L-DOPA	DDI type 26	The risk or severity of adverse effects can be increased when L-DOPA is combined with Arginine.	0.9998	TRUE	TRUE	Broad bean (FOOD00197), Swiss chard (FOOD00237), Yellow wax bean (FOOD00882), Spinach (FOOD00178), Green bean (FOOD00883), Red beetroot (FOOD00264), Broccoli (FOOD00034), Dill (FOOD00013), Orange bell pepper (FOOD00879), Yellow zucchini (FOOD00876)
DB00125	Arginine	FDB000700	Undecanoic acid	DDI type 26	The risk or severity of adverse effects can be increased when Arginine is combined with Undecanoic acid.	0.981515	TRUE	TRUE	Mandarin orange (Clementine, Tangerine) (FOOD00056)
DB00125	Arginine	FDB000753	Ethanol	DDI type 26	The risk or severity of adverse effects can be increased when Arginine is combined with Ethanol.	0.999675	TRUE	TRUE	Gin (FOOD00625), Other alcoholic beverage (FOOD00278), Rum (FOOD00629), Vodka (FOOD00622), Spirit (FOOD00276), Whisky (FOOD00623), Liquor (FOOD00616), Madeira wine (FOOD00633), Vanilla (FOOD00195), Sake (FOOD00738)
DB00125	Arginine	FDB000753	Ethanol	DDI type 54	Arginine may increase the central nervous system depressant (CNS depressant) activities of Ethanol.	0.998605	FALSE	FALSE	Gin (FOOD00625), Other alcoholic beverage (FOOD00278), Rum (FOOD00629), Vodka (FOOD00622), Spirit (FOOD00276), Whisky (FOOD00623), Liquor (FOOD00616), Madeira wine (FOOD00633), Vanilla (FOOD00195), Sake (FOOD00738)
DB00125	Arginine	FDB000757	Nonane	DDI type 26	The risk or severity of adverse effects can be increased when Arginine is combined with Nonane.	0.999921	TRUE	TRUE	Lime (FOOD00053), Common oregano (FOOD00124)
DB00125	Arginine	FDB000765	Hexane	DDI type 26	The risk or severity of adverse effects can be increased when Arginine is combined with Hexane.	0.999926	TRUE	TRUE	Kohlrabi (FOOD00033)
DB00125	Arginine	FDB000765	Hexane	DDI type 26	The risk or severity of adverse effects can be increased when Hexane is combined with Arginine.	0.999108	TRUE	TRUE	Kohlrabi (FOOD00033)
DB00125	Arginine	FDB000768	Pentane	DDI type 26	The risk or severity of adverse effects can be increased when Arginine is combined with Pentane.	0.999376	TRUE	TRUE	Kohlrabi (FOOD00033)
DB00125	Arginine	FDB000768	Pentane	DDI type 26	The risk or severity of adverse effects can be increased when Pentane is combined with Arginine.	0.999835	TRUE	TRUE	Kohlrabi (FOOD00033)
DB00125	Arginine	FDB000842	2,4-Dihydroxybenzoic acid	DDI type 6	The metabolism of Arginine can be decreased when combined with 2,4-Dihydroxybenzoic acid.	0.997294	TRUE	FALSE	American cranberry (FOOD00192), Olive (FOOD00121)
DB00125	Arginine	FDB000844	Gentisic acid	DDI type 6	The metabolism of Arginine can be decreased when combined with Gentisic acid.	0.998447	TRUE	FALSE	Tarragon (FOOD00019), Common thyme (FOOD00183), Common sage (FOOD00165), Lemon balm (FOOD00108), Parsley (FOOD00131), Rosemary (FOOD00159), Horseradish (FOOD00018), Sweet basil (FOOD00119), Peanut (FOOD00016), Hyssop (FOOD00089)
DB00125	Arginine	FDB000845	2,6-Dihydroxybenzoic acid	DDI type 6	The metabolism of Arginine can be decreased when combined with 2,6-Dihydroxybenzoic acid.	0.994376	TRUE	FALSE	Beer (FOOD00268), Olive (FOOD00121)
DB00125	Arginine	FDB000848	3,5-Dihydroxybenzoic acid	DDI type 6	The metabolism of Arginine can be decreased when combined with 3,5-Dihydroxybenzoic acid.	0.987281	TRUE	FALSE	Beer (FOOD00268)
DB00125	Arginine	FDB000849	Phloretic acid	DDI type 13	The therapeutic efficacy of Arginine can be decreased when used in combination with Phloretic acid.	0.983994	TRUE	FALSE	Olive (FOOD00121)
DB00125	Arginine	FDB000968	Pentyl pentanoate	DDI type 26	The risk or severity of adverse effects can be increased when Arginine is combined with Pentyl pentanoate.	0.987678	TRUE	TRUE	Peppermint (FOOD00113)
DB00125	Arginine	FDB001014	Nicotinic acid	DDI type 13	The therapeutic efficacy of Arginine can be decreased when used in combination with Nicotinic acid.	0.993628	TRUE	FALSE	Leavening agent (FOOD00661), Yellowfin tuna (FOOD00511), Skipjack tuna (FOOD00476), Meat bouillon (FOOD00657), Hedge mustard (FOOD00475), European anchovy (FOOD00362), Mexican groundcherry (FOOD00491), Peanut (FOOD00016), Mugwort (FOOD00020), Sockeye salmon (FOOD00453)
DB00125	Arginine	FDB001022	Ethyl hexadecanoate	DDI type 13	The therapeutic efficacy of Ethyl hexadecanoate can be decreased when used in combination with Arginine.	0.97523	FALSE	FALSE	Coriander (FOOD00061)
DB00125	Arginine	FDB001022	Ethyl hexadecanoate	DDI type 26	The risk or severity of adverse effects can be increased when Ethyl hexadecanoate is combined with Arginine.	0.982009	TRUE	TRUE	Coriander (FOOD00061)
DB00125	Arginine	FDB001037	4-Aminobenzoic acid	DDI type 26	The risk or severity of adverse effects can be increased when 4-Aminobenzoic acid is combined with Arginine.	0.999769	TRUE	TRUE	Pineapple (FOOD00012)
DB00125	Arginine	FDB001176	Isodulcitol	DDI type 13	The therapeutic efficacy of Isodulcitol can be decreased when used in combination with Arginine.	0.997716	FALSE	FALSE	Flaxseed (FOOD00101)
DB00125	Arginine	FDB001202	D-Mannose	DDI type 13	The therapeutic efficacy of D-Mannose can be decreased when used in combination with Arginine.	0.989146	FALSE	FALSE	Corn (FOOD00205)
DB00125	Arginine	FDB001267	Hexyl acetate	DDI type 26	The risk or severity of adverse effects can be increased when Arginine is combined with Hexyl acetate.	0.99871	TRUE	TRUE	Highbush blueberry (FOOD00191)
DB00125	Arginine	FDB001353	Uttronin A	DDI type 10	The serum concentration of Uttronin A can be increased when it is combined with Arginine.	0.951442	FALSE	FALSE	Soft-necked garlic (FOOD00850)
DB00125	Arginine	FDB001783	3-Methoxy-4-hydroxyphenylacetic acid	DDI type 26	The risk or severity of adverse effects can be increased when Arginine is combined with 3-Methoxy-4-hydroxyphenylacetic acid.	0.986415	TRUE	TRUE	Olive (FOOD00121), Beer (FOOD00268)
DB00125	Arginine	FDB002119	6-Propyltridecane	DDI type 26	The risk or severity of adverse effects can be increased when 6-Propyltridecane is combined with Arginine.	0.990238	TRUE	TRUE	Black walnut (FOOD00093)
DB00125	Arginine	FDB002412	Tangeritin	DDI type 26	The risk or severity of adverse effects can be increased when Arginine is combined with Tangeritin.	0.99986	TRUE	TRUE	Sweet orange (FOOD00057)
DB00125	Arginine	FDB002412	Tangeritin	DDI type 26	The risk or severity of adverse effects can be increased when Tangeritin is combined with Arginine.	0.99839	TRUE	TRUE	Sweet orange (FOOD00057)
DB00125	Arginine	FDB002465	Tetramethylscutellarein	DDI type 26	The risk or severity of adverse effects can be increased when Arginine is combined with Tetramethylscutellarein.	0.990869	TRUE	TRUE	Sweet orange (FOOD00057)
DB00125	Arginine	FDB002465	Tetramethylscutellarein	DDI type 26	The risk or severity of adverse effects can be increased when Tetramethylscutellarein is combined with Arginine.	0.998496	TRUE	TRUE	Sweet orange (FOOD00057)
DB00125	Arginine	FDB002590	m-Coumaric acid	DDI type 7	The metabolism of m-Coumaric acid can be increased when combined with Arginine.	0.997646	FALSE	FALSE	Olive (FOOD00121), Corn (FOOD00205), Beer (FOOD00268)
DB00125	Arginine	FDB002590	m-Coumaric acid	DDI type 13	The therapeutic efficacy of Arginine can be decreased when used in combination with m-Coumaric acid.	0.996916	TRUE	FALSE	Olive (FOOD00121), Corn (FOOD00205), Beer (FOOD00268)
DB00125	Arginine	FDB002881	Alliospiroside D	DDI type 10	The serum concentration of Alliospiroside D can be increased when it is combined with Arginine.	0.997749	FALSE	FALSE	Garden onion (FOOD00006)
DB00125	Arginine	FDB002951	Elaidic acid	DDI type 26	The risk or severity of adverse effects can be increased when Arginine is combined with Elaidic acid.	0.996794	TRUE	TRUE	Pomegranate (FOOD00151), Milk (Cow) (FOOD00618)
DB00125	Arginine	FDB002952	Vaccenic acid	DDI type 26	The risk or severity of adverse effects can be increased when Arginine is combined with Vaccenic acid.	0.996794	TRUE	TRUE	Other animal fat (FOOD00682), Margarine (FOOD00843), Scombridae (Bonito, Mackerel, Tuna) (FOOD00586), Cattle (Beef, Veal) (FOOD00495), Domestic pig (FOOD00536), Other dish (FOOD00836), Sturgeon (FOOD00570), Clupeinae (Herring, Sardine, Sprat) (FOOD00520), Rainbow trout (FOOD00444), Milk (Cow) (FOOD00618)
DB00125	Arginine	FDB003051	Cetyl alcohol	DDI type 26	The risk or severity of adverse effects can be increased when Arginine is combined with Cetyl alcohol.	0.983299	TRUE	TRUE	Kohlrabi (FOOD00033)
DB00125	Arginine	FDB003051	Cetyl alcohol	DDI type 26	The risk or severity of adverse effects can be increased when Cetyl alcohol is combined with Arginine.	0.998285	TRUE	TRUE	Kohlrabi (FOOD00033)
DB00125	Arginine	FDB003107	Coronaric acid	DDI type 26	The risk or severity of adverse effects can be increased when Arginine is combined with Coronaric acid.	0.988722	TRUE	TRUE	Rice (FOOD00125)
DB00125	Arginine	FDB003107	Coronaric acid	DDI type 26	The risk or severity of adverse effects can be increased when Coronaric acid is combined with Arginine.	0.989929	TRUE	TRUE	Rice (FOOD00125)
DB00125	Arginine	FDB003175	1-Pentanesulfenothioic acid	DDI type 26	The risk or severity of adverse effects can be increased when Arginine is combined with 1-Pentanesulfenothioic acid.	0.999124	TRUE	TRUE	Chives (FOOD00009)
DB00125	Arginine	FDB003175	1-Pentanesulfenothioic acid	DDI type 26	The risk or severity of adverse effects can be increased when 1-Pentanesulfenothioic acid is combined with Arginine.	0.999695	TRUE	TRUE	Chives (FOOD00009)
DB00125	Arginine	FDB003255	2-Ethyl-1-hexanol	DDI type 26	The risk or severity of adverse effects can be increased when Arginine is combined with 2-Ethyl-1-hexanol.	0.999854	TRUE	TRUE	Corn (FOOD00205), Peppermint (FOOD00113)
DB00125	Arginine	FDB003255	2-Ethyl-1-hexanol	DDI type 26	The risk or severity of adverse effects can be increased when 2-Ethyl-1-hexanol is combined with Arginine.	0.99794	TRUE	TRUE	Corn (FOOD00205), Peppermint (FOOD00113)
DB00125	Arginine	FDB003303	Nonanal	DDI type 26	The risk or severity of adverse effects can be increased when Arginine is combined with Nonanal.	0.997529	TRUE	TRUE	Corn (FOOD00205), Black tea (FOOD00907), Green tea (FOOD00908), Herbal tea (FOOD00989), Red tea (FOOD00925), Tea (FOOD00038), Ginger (FOOD00206), Lime (FOOD00053), Lemon (FOOD00054), Sweet orange (FOOD00057)
DB00125	Arginine	FDB003308	2-Nonanone	DDI type 26	The risk or severity of adverse effects can be increased when Arginine is combined with 2-Nonanone.	0.999271	TRUE	TRUE	Corn (FOOD00205), Ginger (FOOD00206), Cloves (FOOD00179)
DB00125	Arginine	FDB003336	Octanoic acid	DDI type 26	The risk or severity of adverse effects can be increased when Octanoic acid is combined with Arginine.	0.998534	TRUE	TRUE	Babassu palm (FOOD00773), Coconut (FOOD00336), Oil palm (FOOD00591), Butter (FOOD00648), Butterfat (FOOD00760), Coffee mocha (FOOD00743), Common sage (FOOD00165), Cream substitute (FOOD00713), Cheese (FOOD00617), Cream (FOOD00650)
DB00125	Arginine	FDB003337	Methyl caprylate	DDI type 26	The risk or severity of adverse effects can be increased when Arginine is combined with Methyl caprylate.	0.996411	TRUE	TRUE	Pineapple (FOOD00012)
DB00125	Arginine	FDB003337	Methyl caprylate	DDI type 13	The therapeutic efficacy of Arginine can be decreased when used in combination with Methyl caprylate.	0.979099	TRUE	FALSE	Pineapple (FOOD00012)
DB00125	Arginine	FDB003339	Octanal	DDI type 26	The risk or severity of adverse effects can be increased when Arginine is combined with Octanal.	0.990803	TRUE	TRUE	Lime (FOOD00053), Caraway (FOOD00043), Mandarin orange (Clementine, Tangerine) (FOOD00056), Carrot (FOOD00245), Wild carrot (FOOD00072)
DB00125	Arginine	FDB003342	2-Octanol	DDI type 26	The risk or severity of adverse effects can be increased when Arginine is combined with 2-Octanol.	0.999854	TRUE	TRUE	Corn (FOOD00205)
DB00125	Arginine	FDB003342	2-Octanol	DDI type 26	The risk or severity of adverse effects can be increased when 2-Octanol is combined with Arginine.	0.998693	TRUE	TRUE	Corn (FOOD00205)
DB00125	Arginine	FDB003343	3-Octanol	DDI type 26	The risk or severity of adverse effects can be increased when Arginine is combined with 3-Octanol.	0.99984	TRUE	TRUE	Cornmint (FOOD00111), Spearmint (FOOD00112), Orange mint (FOOD00110), Common oregano (FOOD00124), Peppermint (FOOD00113), Rosemary (FOOD00159), Lemon balm (FOOD00108), Hyssop (FOOD00089)
DB00125	Arginine	FDB003343	3-Octanol	DDI type 26	The risk or severity of adverse effects can be increased when 3-Octanol is combined with Arginine.	0.998281	TRUE	TRUE	Cornmint (FOOD00111), Spearmint (FOOD00112), Orange mint (FOOD00110), Common oregano (FOOD00124), Peppermint (FOOD00113), Rosemary (FOOD00159), Lemon balm (FOOD00108), Hyssop (FOOD00089)
DB00125	Arginine	FDB003598	17alpha-ethynylestradiol	DDI type 7	The metabolism of 17alpha-ethynylestradiol can be increased when combined with Arginine.	0.994487	FALSE	FALSE	Cloves (FOOD00179), Cardamom (FOOD00074), Ginkgo nuts (FOOD00367), Nutmeg (FOOD00118), Star anise (FOOD00090), Ginger (FOOD00206), Ceylon cinnamon (FOOD00051), Cumin (FOOD00067), Pot marjoram (FOOD00123), Anise (FOOD00137)
DB00125	Arginine	FDB003598	17alpha-ethynylestradiol	DDI type 13	The therapeutic efficacy of Arginine can be decreased when used in combination with 17alpha-ethynylestradiol.	0.982286	TRUE	FALSE	Cloves (FOOD00179), Cardamom (FOOD00074), Ginkgo nuts (FOOD00367), Nutmeg (FOOD00118), Star anise (FOOD00090), Ginger (FOOD00206), Ceylon cinnamon (FOOD00051), Cumin (FOOD00067), Pot marjoram (FOOD00123), Anise (FOOD00137)
DB00125	Arginine	FDB003654	Ornithine	DDI type 26	The risk or severity of adverse effects can be increased when Arginine is combined with Ornithine.	0.988448	TRUE	TRUE	Green zucchini (FOOD00875), Potato (FOOD00175), Garden onion (FOOD00006), Broccoli (FOOD00034), Sunburst squash (pattypan squash) (FOOD00874), Spinach (FOOD00178), Cucumber (FOOD00065), Yellow bell pepper (FOOD00878), Green bell pepper (FOOD00877), Orange bell pepper (FOOD00879)
DB00125	Arginine	FDB003668	Prostaglandin A-1	DDI type 26	The risk or severity of adverse effects can be increased when Arginine is combined with Prostaglandin A-1.	0.972408	TRUE	TRUE	Garden onion (FOOD00006)
DB00125	Arginine	FDB003668	Prostaglandin A-1	DDI type 26	The risk or severity of adverse effects can be increased when Prostaglandin A-1 is combined with Arginine.	0.997261	TRUE	TRUE	Garden onion (FOOD00006)
DB00125	Arginine	FDB003685	S-Allylmercaptocysteine	DDI type 26	The risk or severity of adverse effects can be increased when S-Allylmercaptocysteine is combined with Arginine.	0.998535	TRUE	TRUE	Soft-necked garlic (FOOD00850)
DB00125	Arginine	FDB003771	Gadoleic acid	DDI type 26	The risk or severity of adverse effects can be increased when Arginine is combined with Gadoleic acid.	0.997376	TRUE	TRUE	Fish oil (FOOD00990), Other fish product (FOOD00665), Lumpsucker (FOOD00585), White mustard (FOOD00413), Greenland halibut/turbot (FOOD00370), Scombridae (Bonito, Mackerel, Tuna) (FOOD00586), Gadus (Common cod) (FOOD00515), Anguilliformes (FOOD00577), Rape (FOOD00029), Colorado pinyon (FOOD00433)
DB00125	Arginine	FDB003965	N-Pentyl benzene	DDI type 26	The risk or severity of adverse effects can be increased when Arginine is combined with N-Pentyl benzene.	0.987826	TRUE	TRUE	Wild celery (FOOD00015)
DB00125	Arginine	FDB003965	N-Pentyl benzene	DDI type 26	The risk or severity of adverse effects can be increased when N-Pentyl benzene is combined with Arginine.	0.9924	TRUE	TRUE	Wild celery (FOOD00015)
DB00125	Arginine	FDB004036	Hexadecenoic acid	DDI type 26	The risk or severity of adverse effects can be increased when Arginine is combined with Hexadecenoic acid.	0.960711	TRUE	TRUE	Muskmelon (FOOD00064), Sesame (FOOD00170), Parsley (FOOD00131)
DB00125	Arginine	FDB004105	1-Heptadecene	DDI type 26	The risk or severity of adverse effects can be increased when Arginine is combined with 1-Heptadecene.	0.9587	TRUE	TRUE	Safflower (FOOD00042)
DB00125	Arginine	FDB004234	Melatonin	DDI type 26	The risk or severity of adverse effects can be increased when Arginine is combined with Melatonin.	0.999981	TRUE	TRUE	Corn (FOOD00205)
DB00125	Arginine	FDB004234	Melatonin	DDI type 26	The risk or severity of adverse effects can be increased when Melatonin is combined with Arginine.	0.999769	TRUE	TRUE	Corn (FOOD00205)
DB00125	Arginine	FDB004307	2-Phenethyl isothiocyanate	DDI type 26	The risk or severity of adverse effects can be increased when Arginine is combined with 2-Phenethyl isothiocyanate.	0.99981	TRUE	TRUE	Kohlrabi (FOOD00033)
DB00125	Arginine	FDB004307	2-Phenethyl isothiocyanate	DDI type 26	The risk or severity of adverse effects can be increased when 2-Phenethyl isothiocyanate is combined with Arginine.	0.996437	TRUE	TRUE	Kohlrabi (FOOD00033)
DB00125	Arginine	FDB004514	2-Hexanol	DDI type 26	The risk or severity of adverse effects can be increased when Arginine is combined with 2-Hexanol.	0.999725	TRUE	TRUE	Safflower (FOOD00042)
DB00125	Arginine	FDB004514	2-Hexanol	DDI type 26	The risk or severity of adverse effects can be increased when 2-Hexanol is combined with Arginine.	0.999723	TRUE	TRUE	Safflower (FOOD00042)
DB00125	Arginine	FDB004676	Heptadecanoic acid	DDI type 26	The risk or severity of adverse effects can be increased when Arginine is combined with Heptadecanoic acid.	0.996629	TRUE	TRUE	Cinnamon (FOOD00572), Cattle (Beef, Veal) (FOOD00495), Sturgeon (FOOD00570), Crab (FOOD00573), Sausage (FOOD00652), Rabbit (FOOD00528), Cashew nut (FOOD00011), Oyster mushroom (FOOD00553), Clawed lobster (FOOD00584), Atlantic halibut (FOOD00516)
DB00125	Arginine	FDB004676	Heptadecanoic acid	DDI type 26	The risk or severity of adverse effects can be increased when Heptadecanoic acid is combined with Arginine.	0.997081	TRUE	TRUE	Cinnamon (FOOD00572), Cattle (Beef, Veal) (FOOD00495), Sturgeon (FOOD00570), Crab (FOOD00573), Sausage (FOOD00652), Rabbit (FOOD00528), Cashew nut (FOOD00011), Oyster mushroom (FOOD00553), Clawed lobster (FOOD00584), Atlantic halibut (FOOD00516)
DB00125	Arginine	FDB004731	N-Tetradecane	DDI type 26	The risk or severity of adverse effects can be increased when Arginine is combined with N-Tetradecane.	0.998016	TRUE	TRUE	Black walnut (FOOD00093)
DB00125	Arginine	FDB004731	N-Tetradecane	DDI type 26	The risk or severity of adverse effects can be increased when N-Tetradecane is combined with Arginine.	0.999623	TRUE	TRUE	Black walnut (FOOD00093)
DB00125	Arginine	FDB004741	(Z)-3-Hexenylbenzoate	DDI type 26	The risk or severity of adverse effects can be increased when (Z)-3-Hexenylbenzoate is combined with Arginine.	0.995	TRUE	TRUE	Safflower (FOOD00042)
DB00125	Arginine	FDB004763	Ethyl benzene	DDI type 26	The risk or severity of adverse effects can be increased when Arginine is combined with Ethyl benzene.	0.999237	TRUE	TRUE	Black walnut (FOOD00093), Safflower (FOOD00042)
DB00125	Arginine	FDB004763	Ethyl benzene	DDI type 26	The risk or severity of adverse effects can be increased when Ethyl benzene is combined with Arginine.	0.998545	TRUE	TRUE	Black walnut (FOOD00093), Safflower (FOOD00042)
DB00125	Arginine	FDB005197	Ethyl pentadecanoate	DDI type 26	The risk or severity of adverse effects can be increased when Ethyl pentadecanoate is combined with Arginine.	0.995537	TRUE	TRUE	Coriander (FOOD00061)
DB00125	Arginine	FDB005482	Glycosides	DDI type 10	The serum concentration of Glycosides can be increased when it is combined with Arginine.	0.997115	FALSE	FALSE	Apricot (FOOD00144), Fig (FOOD00081)
DB00125	Arginine	FDB005802	Calamene	DDI type 26	The risk or severity of adverse effects can be increased when Arginine is combined with Calamene.	0.992676	TRUE	TRUE	Star anise (FOOD00090), Common sage (FOOD00165)
DB00125	Arginine	FDB005802	Calamene	DDI type 26	The risk or severity of adverse effects can be increased when Calamene is combined with Arginine.	0.999936	TRUE	TRUE	Star anise (FOOD00090), Common sage (FOOD00165)
DB00125	Arginine	FDB005814	1,2,3-Trimethylbenzene	DDI type 26	The risk or severity of adverse effects can be increased when Arginine is combined with 1,2,3-Trimethylbenzene.	0.999664	TRUE	TRUE	Black walnut (FOOD00093)
DB00125	Arginine	FDB005814	1,2,3-Trimethylbenzene	DDI type 26	The risk or severity of adverse effects can be increased when 1,2,3-Trimethylbenzene is combined with Arginine.	0.987742	TRUE	TRUE	Black walnut (FOOD00093)
DB00125	Arginine	FDB005827	3-Methyltridecane	DDI type 26	The risk or severity of adverse effects can be increased when Arginine is combined with 3-Methyltridecane.	0.995795	TRUE	TRUE	Black walnut (FOOD00093)
DB00125	Arginine	FDB005827	3-Methyltridecane	DDI type 26	The risk or severity of adverse effects can be increased when 3-Methyltridecane is combined with Arginine.	0.998846	TRUE	TRUE	Black walnut (FOOD00093)
DB00125	Arginine	FDB006154	5-Methylheptan-3-one	DDI type 26	The risk or severity of adverse effects can be increased when Arginine is combined with 5-Methylheptan-3-one.	0.999924	TRUE	TRUE	Peppermint (FOOD00113)
DB00125	Arginine	FDB006365	alpha,alpha-Dimethylbenzyl alcohol	DDI type 26	The risk or severity of adverse effects can be increased when Arginine is combined with alpha,alpha-Dimethylbenzyl alcohol.	0.997131	TRUE	TRUE	Pot marjoram (FOOD00123)
DB00125	Arginine	FDB006381	(11R,12S,13S)-Epoxy-hydroxyoctadeca-cis-9-cis-15-dien-1-oic acid	DDI type 26	The risk or severity of adverse effects can be increased when (11R,12S,13S)-Epoxy-hydroxyoctadeca-cis-9-cis-15-dien-1-oic acid is combined with Arginine.	0.995789	TRUE	TRUE	Rice (FOOD00125)
DB00125	Arginine	FDB006382	(11S,12S,13S)-Epoxy-hydroxyoctadeca-cis-9-cis-15-dien-1-oic acid	DDI type 26	The risk or severity of adverse effects can be increased when (11S,12S,13S)-Epoxy-hydroxyoctadeca-cis-9-cis-15-dien-1-oic acid is combined with Arginine.	0.995789	TRUE	TRUE	Rice (FOOD00125)
DB00125	Arginine	FDB006916	alpha-Fenchyl acetate	DDI type 26	The risk or severity of adverse effects can be increased when Arginine is combined with alpha-Fenchyl acetate.	0.999834	TRUE	TRUE	Rosemary (FOOD00159)
DB00125	Arginine	FDB006916	alpha-Fenchyl acetate	DDI type 26	The risk or severity of adverse effects can be increased when alpha-Fenchyl acetate is combined with Arginine.	0.999404	TRUE	TRUE	Rosemary (FOOD00159)
DB00125	Arginine	FDB006925	cis-Myrtenol	DDI type 26	The risk or severity of adverse effects can be increased when Arginine is combined with cis-Myrtenol.	0.98852	TRUE	TRUE	Rosemary (FOOD00159)
DB00125	Arginine	FDB006925	cis-Myrtenol	DDI type 26	The risk or severity of adverse effects can be increased when cis-Myrtenol is combined with Arginine.	0.999829	TRUE	TRUE	Rosemary (FOOD00159)
DB00125	Arginine	FDB007498	Diethylstilbesterol	DDI type 7	The metabolism of Diethylstilbesterol can be increased when combined with Arginine.	0.99925	FALSE	FALSE	Gram bean (FOOD00199)
DB00125	Arginine	FDB007640	6,10,14-Trimethylpentadecan-2-one	DDI type 13	The therapeutic efficacy of Arginine can be decreased when used in combination with 6,10,14-Trimethylpentadecan-2-one.	0.95217	TRUE	FALSE	Common oregano (FOOD00124)
DB00125	Arginine	FDB007855	Alliospiroside B	DDI type 10	The serum concentration of Alliospiroside B can be increased when it is combined with Arginine.	0.996994	FALSE	FALSE	Garden onion (FOOD00006)
DB00125	Arginine	FDB008048	Heptanal	DDI type 26	The risk or severity of adverse effects can be increased when Arginine is combined with Heptanal.	0.999073	TRUE	TRUE	Corn (FOOD00205), Black tea (FOOD00907), Green tea (FOOD00908), Herbal tea (FOOD00989), Red tea (FOOD00925), Tea (FOOD00038), Milk (Cow) (FOOD00618), Lemon (FOOD00054), Sweet orange (FOOD00057), Carrot (FOOD00245)
DB00125	Arginine	FDB008048	Heptanal	DDI type 26	The risk or severity of adverse effects can be increased when Heptanal is combined with Arginine.	0.993192	TRUE	TRUE	Corn (FOOD00205), Black tea (FOOD00907), Green tea (FOOD00908), Herbal tea (FOOD00989), Red tea (FOOD00925), Tea (FOOD00038), Milk (Cow) (FOOD00618), Lemon (FOOD00054), Sweet orange (FOOD00057), Carrot (FOOD00245)
DB00125	Arginine	FDB008051	Heptanoic acid	DDI type 26	The risk or severity of adverse effects can be increased when Heptanoic acid is combined with Arginine.	0.999446	TRUE	TRUE	Butter (FOOD00648), Tofu (FOOD00696), Cinnamon (FOOD00572), Smelt (FOOD00519), Chinese cinnamon (FOOD00050), Bearded seal (FOOD00466), Cattle (Beef, Veal) (FOOD00495), Macadamia nut (FOOD00525), Margarine-like spread (FOOD00844), Shortening (FOOD00783)
DB00125	Arginine	FDB008053	1-Heptanol	DDI type 26	The risk or severity of adverse effects can be increased when Arginine is combined with 1-Heptanol.	0.999286	TRUE	TRUE	Corn (FOOD00205), Black walnut (FOOD00093), Mandarin orange (Clementine, Tangerine) (FOOD00056)
DB00125	Arginine	FDB008053	1-Heptanol	DDI type 26	The risk or severity of adverse effects can be increased when 1-Heptanol is combined with Arginine.	0.999775	TRUE	TRUE	Corn (FOOD00205), Black walnut (FOOD00093), Mandarin orange (Clementine, Tangerine) (FOOD00056)
DB00125	Arginine	FDB008055	2-Heptanone	DDI type 26	The risk or severity of adverse effects can be increased when Arginine is combined with 2-Heptanone.	0.999545	TRUE	TRUE	Corn (FOOD00205), Milk (Cow) (FOOD00618), Peppermint (FOOD00113)
DB00125	Arginine	FDB008056	3-Heptanol	DDI type 26	The risk or severity of adverse effects can be increased when Arginine is combined with 3-Heptanol.	0.999869	TRUE	TRUE	Peppermint (FOOD00113)
DB00125	Arginine	FDB008056	3-Heptanol	DDI type 26	The risk or severity of adverse effects can be increased when 3-Heptanol is combined with Arginine.	0.997324	TRUE	TRUE	Peppermint (FOOD00113)
DB00125	Arginine	FDB008068	Hexanal	DDI type 26	The risk or severity of adverse effects can be increased when Arginine is combined with Hexanal.	0.99922	TRUE	TRUE	Corn (FOOD00205), Black walnut (FOOD00093), Black tea (FOOD00907), Green tea (FOOD00908), Herbal tea (FOOD00989), Red tea (FOOD00925), Tea (FOOD00038), Milk (Cow) (FOOD00618), Orange mint (FOOD00110), Common oregano (FOOD00124)
DB00125	Arginine	FDB008068	Hexanal	DDI type 26	The risk or severity of adverse effects can be increased when Hexanal is combined with Arginine.	0.999103	TRUE	TRUE	Corn (FOOD00205), Black walnut (FOOD00093), Black tea (FOOD00907), Green tea (FOOD00908), Herbal tea (FOOD00989), Red tea (FOOD00925), Tea (FOOD00038), Milk (Cow) (FOOD00618), Orange mint (FOOD00110), Common oregano (FOOD00124)
DB00125	Arginine	FDB008072	1-Hexanol	DDI type 26	The risk or severity of adverse effects can be increased when Arginine is combined with 1-Hexanol.	0.997334	TRUE	TRUE	Corn (FOOD00205), Black walnut (FOOD00093), Lovage (FOOD00100), Hyssop (FOOD00089), Milk (Cow) (FOOD00618), Safflower (FOOD00042), Soft-necked garlic (FOOD00850), Parsley (FOOD00131), Sweet orange (FOOD00057), Bilberry (FOOD00193)
DB00125	Arginine	FDB008072	1-Hexanol	DDI type 26	The risk or severity of adverse effects can be increased when 1-Hexanol is combined with Arginine.	0.999864	TRUE	TRUE	Corn (FOOD00205), Black walnut (FOOD00093), Lovage (FOOD00100), Hyssop (FOOD00089), Milk (Cow) (FOOD00618), Safflower (FOOD00042), Soft-necked garlic (FOOD00850), Parsley (FOOD00131), Sweet orange (FOOD00057), Bilberry (FOOD00193)
DB00125	Arginine	FDB008073	3-Hexanol	DDI type 26	The risk or severity of adverse effects can be increased when Arginine is combined with 3-Hexanol.	0.99974	TRUE	TRUE	Safflower (FOOD00042)
DB00125	Arginine	FDB008073	3-Hexanol	DDI type 26	The risk or severity of adverse effects can be increased when 3-Hexanol is combined with Arginine.	0.999685	TRUE	TRUE	Safflower (FOOD00042)
DB00125	Arginine	FDB008230	1-Pentanol	DDI type 26	The risk or severity of adverse effects can be increased when Arginine is combined with 1-Pentanol.	0.99874	TRUE	TRUE	Black walnut (FOOD00093), Common thyme (FOOD00183), Black tea (FOOD00907), Green tea (FOOD00908), Herbal tea (FOOD00989), Red tea (FOOD00925), Tea (FOOD00038), Milk (Cow) (FOOD00618), Safflower (FOOD00042), Bilberry (FOOD00193)
DB00125	Arginine	FDB008230	1-Pentanol	DDI type 26	The risk or severity of adverse effects can be increased when 1-Pentanol is combined with Arginine.	0.999938	TRUE	TRUE	Black walnut (FOOD00093), Common thyme (FOOD00183), Black tea (FOOD00907), Green tea (FOOD00908), Herbal tea (FOOD00989), Red tea (FOOD00925), Tea (FOOD00038), Milk (Cow) (FOOD00618), Safflower (FOOD00042), Bilberry (FOOD00193)
DB00125	Arginine	FDB008492	Cuminyl alcohol	DDI type 26	The risk or severity of adverse effects can be increased when Arginine is combined with Cuminyl alcohol.	0.997427	TRUE	TRUE	Cumin (FOOD00067), Peppermint (FOOD00113)
DB00125	Arginine	FDB008754	Hydroxytyrosol	DDI type 26	The risk or severity of adverse effects can be increased when Arginine is combined with Hydroxytyrosol.	0.99338	TRUE	TRUE	Olive (FOOD00121), Grape wine (FOOD00612)
DB00125	Arginine	FDB008861	4-Methyl-1,2-benzenediol	DDI type 26	The risk or severity of adverse effects can be increased when Arginine is combined with 4-Methyl-1,2-benzenediol.	0.990887	TRUE	TRUE	Arabica coffee (FOOD00059), Coffee (FOOD00058), Robusta coffee (FOOD00060), Cocoa powder (FOOD00685), Beer (FOOD00268)
DB00125	Arginine	FDB009029	Bornyl acetate	DDI type 26	The risk or severity of adverse effects can be increased when Arginine is combined with Bornyl acetate.	0.99985	TRUE	TRUE	Rosemary (FOOD00159), Common sage (FOOD00165), Sweet basil (FOOD00119), Common thyme (FOOD00183), Spearmint (FOOD00112), Ginger (FOOD00206), Cumin (FOOD00067), Carrot (FOOD00245), Wild carrot (FOOD00072), Ceylon cinnamon (FOOD00051)
DB00125	Arginine	FDB009029	Bornyl acetate	DDI type 26	The risk or severity of adverse effects can be increased when Bornyl acetate is combined with Arginine.	0.999407	TRUE	TRUE	Rosemary (FOOD00159), Common sage (FOOD00165), Sweet basil (FOOD00119), Common thyme (FOOD00183), Spearmint (FOOD00112), Ginger (FOOD00206), Cumin (FOOD00067), Carrot (FOOD00245), Wild carrot (FOOD00072), Ceylon cinnamon (FOOD00051)
DB00125	Arginine	FDB009636	Isoborneol	DDI type 26	The risk or severity of adverse effects can be increased when Arginine is combined with Isoborneol.	0.99048	TRUE	TRUE	Common sage (FOOD00165), Turmeric (FOOD00068), Rosemary (FOOD00159), Common oregano (FOOD00124)
DB00125	Arginine	FDB009636	Isoborneol	DDI type 26	The risk or severity of adverse effects can be increased when Isoborneol is combined with Arginine.	0.999863	TRUE	TRUE	Common sage (FOOD00165), Turmeric (FOOD00068), Rosemary (FOOD00159), Common oregano (FOOD00124)
DB00125	Arginine	FDB010039	Pentylamine	DDI type 26	The risk or severity of adverse effects can be increased when Arginine is combined with Pentylamine.	0.998904	TRUE	TRUE	Green bell pepper (FOOD00877), Orange bell pepper (FOOD00879), Pepper (FOOD00040), Red bell pepper (FOOD00880), Yellow bell pepper (FOOD00878), Cabbage (FOOD00851), White cabbage (FOOD00887), Apple (FOOD00105)
DB00125	Arginine	FDB010420	Fenchyl acetate	DDI type 26	The risk or severity of adverse effects can be increased when Arginine is combined with Fenchyl acetate.	0.999834	TRUE	TRUE	Sweet basil (FOOD00119)
DB00125	Arginine	FDB010420	Fenchyl acetate	DDI type 26	The risk or severity of adverse effects can be increased when Fenchyl acetate is combined with Arginine.	0.999404	TRUE	TRUE	Sweet basil (FOOD00119)
DB00125	Arginine	FDB010504	4-Hydroxybenzaldehyde	DDI type 7	The metabolism of 4-Hydroxybenzaldehyde can be increased when combined with Arginine.	0.99828	FALSE	FALSE	Vinegar (FOOD00628), Oat (FOOD00022)
DB00125	Arginine	FDB010504	4-Hydroxybenzaldehyde	DDI type 13	The therapeutic efficacy of Arginine can be decreased when used in combination with 4-Hydroxybenzaldehyde.	0.965135	TRUE	FALSE	Vinegar (FOOD00628), Oat (FOOD00022)
DB00125	Arginine	FDB010527	Zingerone	DDI type 26	The risk or severity of adverse effects can be increased when Arginine is combined with Zingerone.	0.999355	TRUE	TRUE	Pot marjoram (FOOD00123), Ginger (FOOD00206)
DB00125	Arginine	FDB010539	2-Vinylphenol	DDI type 7	The metabolism of 2-Vinylphenol can be increased when combined with Arginine.	0.986716	FALSE	FALSE	Ceylon cinnamon (FOOD00051)
DB00125	Arginine	FDB010539	2-Vinylphenol	DDI type 13	The therapeutic efficacy of Arginine can be decreased when used in combination with 2-Vinylphenol.	0.996003	TRUE	FALSE	Ceylon cinnamon (FOOD00051)
DB00125	Arginine	FDB010560	Ethyl phenylacetate	DDI type 26	The risk or severity of adverse effects can be increased when Arginine is combined with Ethyl phenylacetate.	0.999657	TRUE	TRUE	Corn (FOOD00205)
DB00125	Arginine	FDB010560	Ethyl phenylacetate	DDI type 26	The risk or severity of adverse effects can be increased when Ethyl phenylacetate is combined with Arginine.	0.997034	TRUE	TRUE	Corn (FOOD00205)
DB00125	Arginine	FDB010563	1-Phenylethyl acetate	DDI type 26	The risk or severity of adverse effects can be increased when Arginine is combined with 1-Phenylethyl acetate.	0.999912	TRUE	TRUE	Cloves (FOOD00179)
DB00125	Arginine	FDB010580	2-Phenylethylamine	DDI type 26	The risk or severity of adverse effects can be increased when Arginine is combined with 2-Phenylethylamine.	0.999956	TRUE	TRUE	Red raspberry (FOOD00162), Cabbage (FOOD00851), White cabbage (FOOD00887), Broccoli (FOOD00034), Swiss chard (FOOD00237), Turnip (FOOD00036), Nanking cherry (FOOD00885), Eggplant (FOOD00174), Spinach (FOOD00178), Orange bell pepper (FOOD00879)
DB00125	Arginine	FDB010580	2-Phenylethylamine	DDI type 26	The risk or severity of adverse effects can be increased when 2-Phenylethylamine is combined with Arginine.	0.999851	TRUE	TRUE	Red raspberry (FOOD00162), Cabbage (FOOD00851), White cabbage (FOOD00887), Broccoli (FOOD00034), Swiss chard (FOOD00237), Turnip (FOOD00036), Nanking cherry (FOOD00885), Eggplant (FOOD00174), Spinach (FOOD00178), Orange bell pepper (FOOD00879)
DB00125	Arginine	FDB010581	N-Methylphenethylamine	DDI type 26	The risk or severity of adverse effects can be increased when Arginine is combined with N-Methylphenethylamine.	0.999946	TRUE	TRUE	Cabbage (FOOD00851), White cabbage (FOOD00887), Carrot (FOOD00245), Wild carrot (FOOD00072), Apple (FOOD00105), Corn (FOOD00205)
DB00125	Arginine	FDB010583	Octopamine	DDI type 26	The risk or severity of adverse effects can be increased when Arginine is combined with Octopamine.	0.989885	TRUE	TRUE	Mandarin orange (Clementine, Tangerine) (FOOD00056), Sweet orange (FOOD00057)
DB00125	Arginine	FDB010588	Methyl 4-methoxybenzoate	DDI type 26	The risk or severity of adverse effects can be increased when Arginine is combined with Methyl 4-methoxybenzoate.	0.975629	TRUE	TRUE	Star anise (FOOD00090)
DB00125	Arginine	FDB010873	1-(4-Methoxyphenyl)-2-propanone	DDI type 26	The risk or severity of adverse effects can be increased when Arginine is combined with 1-(4-Methoxyphenyl)-2-propanone.	0.999888	TRUE	TRUE	Anise (FOOD00137)
DB00125	Arginine	FDB010873	1-(4-Methoxyphenyl)-2-propanone	DDI type 26	The risk or severity of adverse effects can be increased when 1-(4-Methoxyphenyl)-2-propanone is combined with Arginine.	0.941743	TRUE	TRUE	Anise (FOOD00137)
DB00125	Arginine	FDB011258	o-Coumaric acid	DDI type 7	The metabolism of o-Coumaric acid can be increased when combined with Arginine.	0.994916	FALSE	FALSE	Corn (FOOD00205), Hard wheat (FOOD00242), Olive (FOOD00121), American cranberry (FOOD00192), Fennel (FOOD00082), Date (FOOD00135), Peanut (FOOD00016), Common wheat (FOOD00187), Beer (FOOD00268), Grape wine (FOOD00612)
DB00125	Arginine	FDB011258	o-Coumaric acid	DDI type 13	The therapeutic efficacy of Arginine can be decreased when used in combination with o-Coumaric acid.	0.997928	TRUE	FALSE	Corn (FOOD00205), Hard wheat (FOOD00242), Olive (FOOD00121), American cranberry (FOOD00192), Fennel (FOOD00082), Date (FOOD00135), Peanut (FOOD00016), Common wheat (FOOD00187), Beer (FOOD00268), Grape wine (FOOD00612)
DB00125	Arginine	FDB011261	Dibutyl phthalate	DDI type 26	The risk or severity of adverse effects can be increased when Dibutyl phthalate is combined with Arginine.	0.991568	TRUE	TRUE	Kohlrabi (FOOD00033)
DB00125	Arginine	FDB011417	3-Phenylpropyl acetate	DDI type 26	The risk or severity of adverse effects can be increased when Arginine is combined with 3-Phenylpropyl acetate.	0.997596	TRUE	TRUE	Ceylon cinnamon (FOOD00051)
DB00125	Arginine	FDB011417	3-Phenylpropyl acetate	DDI type 26	The risk or severity of adverse effects can be increased when 3-Phenylpropyl acetate is combined with Arginine.	0.993885	TRUE	TRUE	Ceylon cinnamon (FOOD00051)
DB00125	Arginine	FDB011703	(S)-[8]-Gingerol	DDI type 6	The metabolism of Arginine can be decreased when combined with (S)-[8]-Gingerol.	0.993892	TRUE	FALSE	Ginger (FOOD00206)
DB00125	Arginine	FDB011708	Hexyl butyrate	DDI type 26	The risk or severity of adverse effects can be increased when Arginine is combined with Hexyl butyrate.	0.989184	TRUE	TRUE	Passion fruit (FOOD00128)
DB00125	Arginine	FDB011794	(R)-3-Octyl acetate	DDI type 26	The risk or severity of adverse effects can be increased when Arginine is combined with (R)-3-Octyl acetate.	0.986564	TRUE	TRUE	Spearmint (FOOD00112)
DB00125	Arginine	FDB011835	3-Phenylpropanal	DDI type 26	The risk or severity of adverse effects can be increased when Arginine is combined with 3-Phenylpropanal.	0.999952	TRUE	TRUE	Ceylon cinnamon (FOOD00051)
DB00125	Arginine	FDB011952	Hexadecane	DDI type 26	The risk or severity of adverse effects can be increased when Hexadecane is combined with Arginine.	0.99765	TRUE	TRUE	Black walnut (FOOD00093)
DB00125	Arginine	FDB012027	Decanoic acid	DDI type 13	The therapeutic efficacy of Arginine can be decreased when used in combination with Decanoic acid.	0.997736	TRUE	FALSE	Babassu palm (FOOD00773), Coconut (FOOD00336), Butterfat (FOOD00760), Butter (FOOD00648), Oil palm (FOOD00591), Coffee mocha (FOOD00743), Common sage (FOOD00165), Margarine-like spread (FOOD00844), Cream (FOOD00650), Ucuhuba (FOOD00777)
DB00125	Arginine	FDB012059	Benzylamine	DDI type 26	The risk or severity of adverse effects can be increased when Arginine is combined with Benzylamine.	0.999922	TRUE	TRUE	Corn (FOOD00205), Cabbage (FOOD00851), White cabbage (FOOD00887), Carrot (FOOD00245), Wild carrot (FOOD00072), Apple (FOOD00105)
DB00125	Arginine	FDB012059	Benzylamine	DDI type 26	The risk or severity of adverse effects can be increased when Benzylamine is combined with Arginine.	0.999537	TRUE	TRUE	Corn (FOOD00205), Cabbage (FOOD00851), White cabbage (FOOD00887), Carrot (FOOD00245), Wild carrot (FOOD00072), Apple (FOOD00105)
DB00125	Arginine	FDB012152	2-Phenylethanol	DDI type 26	The risk or severity of adverse effects can be increased when Arginine is combined with 2-Phenylethanol.	0.999845	TRUE	TRUE	Black walnut (FOOD00093), Sweet basil (FOOD00119), Ceylon cinnamon (FOOD00051), Peppermint (FOOD00113), Highbush blueberry (FOOD00191), Bilberry (FOOD00193)
DB00125	Arginine	FDB012152	2-Phenylethanol	DDI type 26	The risk or severity of adverse effects can be increased when 2-Phenylethanol is combined with Arginine.	0.999558	TRUE	TRUE	Black walnut (FOOD00093), Sweet basil (FOOD00119), Ceylon cinnamon (FOOD00051), Peppermint (FOOD00113), Highbush blueberry (FOOD00191), Bilberry (FOOD00193)
DB00125	Arginine	FDB012153	2-Phenylethyl acetate	DDI type 26	The risk or severity of adverse effects can be increased when Arginine is combined with 2-Phenylethyl acetate.	0.999871	TRUE	TRUE	Ceylon cinnamon (FOOD00051), Cloves (FOOD00179)
DB00125	Arginine	FDB012153	2-Phenylethyl acetate	DDI type 26	The risk or severity of adverse effects can be increased when 2-Phenylethyl acetate is combined with Arginine.	0.997656	TRUE	TRUE	Ceylon cinnamon (FOOD00051), Cloves (FOOD00179)
DB00125	Arginine	FDB012158	Serotonin	DDI type 26	The risk or severity of adverse effects can be increased when Arginine is combined with Serotonin.	0.99998	TRUE	TRUE	Sea-buckthornberry (FOOD00087), Common walnut (FOOD00094), Oat (FOOD00022), Swiss chard (FOOD00237), Pineapple (FOOD00012), Nanking cherry (FOOD00885), Barley (FOOD00088), Rye (FOOD00169), Pomegranate (FOOD00151), Date (FOOD00135)
DB00125	Arginine	FDB012158	Serotonin	DDI type 26	The risk or severity of adverse effects can be increased when Serotonin is combined with Arginine.	0.999897	TRUE	TRUE	Sea-buckthornberry (FOOD00087), Common walnut (FOOD00094), Oat (FOOD00022), Swiss chard (FOOD00237), Pineapple (FOOD00012), Nanking cherry (FOOD00885), Barley (FOOD00088), Rye (FOOD00169), Pomegranate (FOOD00151), Date (FOOD00135)
DB00125	Arginine	FDB012163	Dopamine	DDI type 26	The risk or severity of adverse effects can be increased when Arginine is combined with Dopamine.	0.997597	TRUE	TRUE	Swiss chard (FOOD00237), Oat (FOOD00022), Red beetroot (FOOD00264), Rye (FOOD00169), Wheat (FOOD00561), Barley (FOOD00088), Red raspberry (FOOD00162), Dill (FOOD00013), Yellow wax bean (FOOD00882), Green zucchini (FOOD00875)
DB00125	Arginine	FDB012171	Eugenol	DDI type 26	The risk or severity of adverse effects can be increased when Arginine is combined with Eugenol.	0.997274	TRUE	TRUE	Cloves (FOOD00179), Allspice (FOOD00287), Carrot (FOOD00245), Wild carrot (FOOD00072), Sweet basil (FOOD00119), Turmeric (FOOD00068), Ceylon cinnamon (FOOD00051), Sweet marjoram (FOOD00122), Sweet bay (FOOD00097), Hyssop (FOOD00089)
DB00125	Arginine	FDB012188	3-Phenyl-1-propanol	DDI type 26	The risk or severity of adverse effects can be increased when Arginine is combined with 3-Phenyl-1-propanol.	0.999812	TRUE	TRUE	Bilberry (FOOD00193)
DB00125	Arginine	FDB012188	3-Phenyl-1-propanol	DDI type 26	The risk or severity of adverse effects can be increased when 3-Phenyl-1-propanol is combined with Arginine.	0.998649	TRUE	TRUE	Bilberry (FOOD00193)
DB00125	Arginine	FDB012200	2,3-Dihydroxybenzoic acid	DDI type 6	The metabolism of Arginine can be decreased when combined with 2,3-Dihydroxybenzoic acid.	0.993276	TRUE	FALSE	Cucumber (FOOD00065), Broccoli (FOOD00034), Dill (FOOD00013), Romaine lettuce (FOOD00888), Yellow wax bean (FOOD00882), Garden onion (FOOD00006), Carrot (FOOD00245), Yellow bell pepper (FOOD00878), American cranberry (FOOD00192), Italian sweet red pepper (FOOD00881)
DB00125	Arginine	FDB012268	Isopropylbenzene	DDI type 26	The risk or severity of adverse effects can be increased when Arginine is combined with Isopropylbenzene.	0.998269	TRUE	TRUE	Ceylon cinnamon (FOOD00051), Ginger (FOOD00206)
DB00125	Arginine	FDB012268	Isopropylbenzene	DDI type 26	The risk or severity of adverse effects can be increased when Isopropylbenzene is combined with Arginine.	0.998249	TRUE	TRUE	Ceylon cinnamon (FOOD00051), Ginger (FOOD00206)
DB00125	Arginine	FDB012435	Ethyl tetradecanoate	DDI type 26	The risk or severity of adverse effects can be increased when Arginine is combined with Ethyl tetradecanoate.	0.988869	TRUE	TRUE	Coriander (FOOD00061)
DB00125	Arginine	FDB012435	Ethyl tetradecanoate	DDI type 26	The risk or severity of adverse effects can be increased when Ethyl tetradecanoate is combined with Arginine.	0.997195	TRUE	TRUE	Coriander (FOOD00061)
DB00125	Arginine	FDB012441	Ethyl stearate	DDI type 13	The therapeutic efficacy of Ethyl stearate can be decreased when used in combination with Arginine.	0.982335	FALSE	FALSE	Coriander (FOOD00061)
DB00125	Arginine	FDB012441	Ethyl stearate	DDI type 26	The risk or severity of adverse effects can be increased when Ethyl stearate is combined with Arginine.	0.97558	TRUE	TRUE	Coriander (FOOD00061)
DB00125	Arginine	FDB012445	(±)-Isobornyl acetate	DDI type 26	The risk or severity of adverse effects can be increased when Arginine is combined with (±)-Isobornyl acetate.	0.99985	TRUE	TRUE	Spearmint (FOOD00112)
DB00125	Arginine	FDB012445	(±)-Isobornyl acetate	DDI type 26	The risk or severity of adverse effects can be increased when (±)-Isobornyl acetate is combined with Arginine.	0.999407	TRUE	TRUE	Spearmint (FOOD00112)
DB00125	Arginine	FDB012446	(±)-Citronellyl acetate	DDI type 26	The risk or severity of adverse effects can be increased when Arginine is combined with (±)-Citronellyl acetate.	0.999108	TRUE	TRUE	Carrot (FOOD00245), Wild carrot (FOOD00072), Lemon (FOOD00054), Mandarin orange (Clementine, Tangerine) (FOOD00056)
DB00125	Arginine	FDB012456	2-Hydroxybenzaldehyde	DDI type 15	2-Hydroxybenzaldehyde may decrease the excretion rate of Arginine which could result in a higher serum level.	0.982395	TRUE	FALSE	Peppermint (FOOD00113)
DB00125	Arginine	FDB012459	Methyl salicylate	DDI type 15	Methyl salicylate may decrease the excretion rate of Arginine which could result in a higher serum level.	0.999598	TRUE	FALSE	Hyssop (FOOD00089), Bilberry (FOOD00193)
DB00125	Arginine	FDB012485	Nicotinamide	DDI type 13	The therapeutic efficacy of Arginine can be decreased when used in combination with Nicotinamide.	0.99924	TRUE	FALSE	Common sage (FOOD00165), Cocoa bean (FOOD00182), Common pea (FOOD00141)
DB00125	Arginine	FDB012528	D-Fructose	DDI type 13	The therapeutic efficacy of D-Fructose can be decreased when used in combination with Arginine.	0.995121	FALSE	FALSE	Honey (FOOD00626), Agave (FOOD00563), Common grape (FOOD00204), Date (FOOD00135), Molasses (FOOD00786), Turmeric (FOOD00068), Garden onion (FOOD00006), Ketchup (FOOD00756), Jackfruit (FOOD00384), Sugar (FOOD00651)
DB00125	Arginine	FDB012530	D-Glucose	DDI type 13	The therapeutic efficacy of D-Glucose can be decreased when used in combination with Arginine.	0.989146	FALSE	FALSE	Honey (FOOD00626), Common grape (FOOD00204), Date (FOOD00135), Molasses (FOOD00786), Ketchup (FOOD00756), Marshmallow (FOOD00662), Jackfruit (FOOD00384), Mamey sapote (FOOD00459), Liquorice (FOOD00627), Muskmelon (FOOD00064)
DB00125	Arginine	FDB012535	L-Glutamic acid	DDI type 26	The risk or severity of adverse effects can be increased when L-Glutamic acid is combined with Arginine.	0.996679	TRUE	TRUE	Casein (FOOD00659), Other soy product (FOOD00271), Beluga whale (FOOD00300), Gelatin (FOOD00663), Soy bean (FOOD00085), Gelatin dessert (FOOD00725), Meat bouillon (FOOD00657), Cottonseed (FOOD00341), Buttermilk (FOOD00692), Bearded seal (FOOD00466)
DB00125	Arginine	FDB012536	Glutamic acid	DDI type 26	The risk or severity of adverse effects can be increased when Glutamic acid is combined with Arginine.	0.996679	TRUE	TRUE	Red bell pepper (FOOD00880), Milk (Cow) (FOOD00618), Wheat (FOOD00561), Oat (FOOD00022), Rye (FOOD00169), Barley (FOOD00088), Swiss chard (FOOD00237), Red beetroot (FOOD00264), Dill (FOOD00013), White cabbage (FOOD00887)
DB00125	Arginine	FDB012569	Gondoic acid	DDI type 26	The risk or severity of adverse effects can be increased when Arginine is combined with Gondoic acid.	0.997376	TRUE	TRUE	Macadamia nut (FOOD00525)
DB00125	Arginine	FDB012583	1-Octanol	DDI type 26	The risk or severity of adverse effects can be increased when Arginine is combined with 1-Octanol.	0.999808	TRUE	TRUE	Corn (FOOD00205), Coriander (FOOD00061), Spearmint (FOOD00112), Lemon (FOOD00054), Mandarin orange (Clementine, Tangerine) (FOOD00056), Lime (FOOD00053), Kohlrabi (FOOD00033)
DB00125	Arginine	FDB012583	1-Octanol	DDI type 26	The risk or severity of adverse effects can be increased when 1-Octanol is combined with Arginine.	0.999735	TRUE	TRUE	Corn (FOOD00205), Coriander (FOOD00061), Spearmint (FOOD00112), Lemon (FOOD00054), Mandarin orange (Clementine, Tangerine) (FOOD00056), Lime (FOOD00053), Kohlrabi (FOOD00033)
DB00125	Arginine	FDB012647	N-Methylbenzylamine	DDI type 26	The risk or severity of adverse effects can be increased when Arginine is combined with N-Methylbenzylamine.	0.999955	TRUE	TRUE	Carrot (FOOD00245), Wild carrot (FOOD00072)
DB00125	Arginine	FDB012647	N-Methylbenzylamine	DDI type 26	The risk or severity of adverse effects can be increased when N-Methylbenzylamine is combined with Arginine.	0.999563	TRUE	TRUE	Carrot (FOOD00245), Wild carrot (FOOD00072)
DB00125	Arginine	FDB012660	Secoisolariciresinol	DDI type 26	The risk or severity of adverse effects can be increased when Arginine is combined with Secoisolariciresinol.	0.999875	TRUE	TRUE	Flaxseed (FOOD00101), Rye bread (FOOD00809), Asparagus (FOOD00021), Common buckwheat (FOOD00079), Kiwi (FOOD00004), Sesame (FOOD00170), Sunflower (FOOD00086), Soy bean (FOOD00085), Rye (FOOD00169), Black tea (FOOD00907)
DB00125	Arginine	FDB012660	Secoisolariciresinol	DDI type 26	The risk or severity of adverse effects can be increased when Secoisolariciresinol is combined with Arginine.	0.999637	TRUE	TRUE	Flaxseed (FOOD00101), Rye bread (FOOD00809), Asparagus (FOOD00021), Common buckwheat (FOOD00079), Kiwi (FOOD00004), Sesame (FOOD00170), Sunflower (FOOD00086), Soy bean (FOOD00085), Rye (FOOD00169), Black tea (FOOD00907)
DB00125	Arginine	FDB012675	S-Allylcysteine	DDI type 26	The risk or severity of adverse effects can be increased when Arginine is combined with S-Allylcysteine.	0.974293	TRUE	TRUE	Soft-necked garlic (FOOD00850)
DB00125	Arginine	FDB012675	S-Allylcysteine	DDI type 26	The risk or severity of adverse effects can be increased when S-Allylcysteine is combined with Arginine.	0.998547	TRUE	TRUE	Soft-necked garlic (FOOD00850)
DB00125	Arginine	FDB012750	Hordenine	DDI type 26	The risk or severity of adverse effects can be increased when Arginine is combined with Hordenine.	0.999876	TRUE	TRUE	Barley (FOOD00088)
DB00125	Arginine	FDB012755	1-(4-Methylphenyl)ethanol	DDI type 26	The risk or severity of adverse effects can be increased when Arginine is combined with 1-(4-Methylphenyl)ethanol.	0.996474	TRUE	TRUE	Turmeric (FOOD00068)
DB00125	Arginine	FDB012765	Petroselinic acid	DDI type 26	The risk or severity of adverse effects can be increased when Arginine is combined with Petroselinic acid.	0.996794	TRUE	TRUE	Parsley (FOOD00131), Carrot (FOOD00245), Wild carrot (FOOD00072), Anise (FOOD00137), Parsnip (FOOD00129), Coriander (FOOD00061), Chervil (FOOD00327), Caraway (FOOD00043)
DB00125	Arginine	FDB012798	Estrone	DDI type 7	The metabolism of Estrone can be increased when combined with Arginine.	0.950041	FALSE	FALSE	Pomegranate (FOOD00151), Apple (FOOD00105)
DB00125	Arginine	FDB012838	Biphenyl	DDI type 26	The risk or severity of adverse effects can be increased when Arginine is combined with Biphenyl.	0.986313	TRUE	TRUE	Carrot (FOOD00245), Wild carrot (FOOD00072)
DB00125	Arginine	FDB012844	Benzyl benzoate	DDI type 26	The risk or severity of adverse effects can be increased when Arginine is combined with Benzyl benzoate.	0.942751	TRUE	TRUE	Ceylon cinnamon (FOOD00051)
DB00125	Arginine	FDB012844	Benzyl benzoate	DDI type 26	The risk or severity of adverse effects can be increased when Benzyl benzoate is combined with Arginine.	0.998942	TRUE	TRUE	Ceylon cinnamon (FOOD00051)
DB00125	Arginine	FDB012858	Oleic acid	DDI type 26	The risk or severity of adverse effects can be increased when Arginine is combined with Oleic acid.	0.996794	TRUE	TRUE	Rape (FOOD00029), Common hazelnut (FOOD00062), Macadamia nut (FOOD00525), Pecan nut (FOOD00044), Other animal fat (FOOD00682), Lard (FOOD00681), Hazelnut (FOOD00376), Tallow (FOOD00674), Safflower (FOOD00042), Cocoa butter (FOOD00684)
DB00125	Arginine	FDB012887	epsilon-Polylysine	DDI type 26	The risk or severity of adverse effects can be increased when Arginine is combined with epsilon-Polylysine.	0.994503	TRUE	TRUE	Casein (FOOD00659), Gelatin (FOOD00663), Dried milk (FOOD00689), Thunnus (FOOD00607), Rabbit (FOOD00528), Atlantic halibut (FOOD00516), Garfish (FOOD00579), Cheese (FOOD00617), Shrimp (FOOD00533), Anguilliformes (FOOD00577)
DB00125	Arginine	FDB013245	(±)-Phenylalanine	DDI type 26	The risk or severity of adverse effects can be increased when Arginine is combined with (±)-Phenylalanine.	0.997748	TRUE	TRUE	Red bell pepper (FOOD00880), Wheat (FOOD00561), Oat (FOOD00022), Barley (FOOD00088), Rye (FOOD00169), Dill (FOOD00013), Broccoli (FOOD00034), Japanese pumpkin (FOOD00886), Spinach (FOOD00178), Swiss chard (FOOD00237)
DB00125	Arginine	FDB013245	(±)-Phenylalanine	DDI type 26	The risk or severity of adverse effects can be increased when (±)-Phenylalanine is combined with Arginine.	0.999976	TRUE	TRUE	Red bell pepper (FOOD00880), Wheat (FOOD00561), Oat (FOOD00022), Barley (FOOD00088), Rye (FOOD00169), Dill (FOOD00013), Broccoli (FOOD00034), Japanese pumpkin (FOOD00886), Spinach (FOOD00178), Swiss chard (FOOD00237)
DB00125	Arginine	FDB013257	Gingerenone C	DDI type 26	The risk or severity of adverse effects can be increased when Arginine is combined with Gingerenone C.	0.99561	TRUE	TRUE	Ginger (FOOD00206)
DB00125	Arginine	FDB013257	Gingerenone C	DDI type 13	The therapeutic efficacy of Arginine can be decreased when used in combination with Gingerenone C.	0.967145	TRUE	FALSE	Ginger (FOOD00206)
DB00125	Arginine	FDB013522	Fenchol	DDI type 26	The risk or severity of adverse effects can be increased when Arginine is combined with Fenchol.	0.98843	TRUE	TRUE	Sweet basil (FOOD00119), Lime (FOOD00053)
DB00125	Arginine	FDB013522	Fenchol	DDI type 26	The risk or severity of adverse effects can be increased when Fenchol is combined with Arginine.	0.999847	TRUE	TRUE	Sweet basil (FOOD00119), Lime (FOOD00053)
DB00125	Arginine	FDB013574	(±)-Borneol	DDI type 26	The risk or severity of adverse effects can be increased when Arginine is combined with (±)-Borneol.	0.99048	TRUE	TRUE	Common sage (FOOD00165), Cardamom (FOOD00074), Rosemary (FOOD00159), Pot marjoram (FOOD00123), Common thyme (FOOD00183), Spearmint (FOOD00112), Common oregano (FOOD00124), Lime (FOOD00053), Coriander (FOOD00061), Ceylon cinnamon (FOOD00051)
DB00125	Arginine	FDB013574	(±)-Borneol	DDI type 26	The risk or severity of adverse effects can be increased when (±)-Borneol is combined with Arginine.	0.999863	TRUE	TRUE	Common sage (FOOD00165), Cardamom (FOOD00074), Rosemary (FOOD00159), Pot marjoram (FOOD00123), Common thyme (FOOD00183), Spearmint (FOOD00112), Common oregano (FOOD00124), Lime (FOOD00053), Coriander (FOOD00061), Ceylon cinnamon (FOOD00051)
DB00125	Arginine	FDB013828	Retinol	DDI type 26	The risk or severity of adverse effects can be increased when Arginine is combined with Retinol.	0.998805	TRUE	TRUE	Haddock (FOOD00374), Gadus (Common cod) (FOOD00515), Anatidae (FOOD00576), Anguilliformes (FOOD00577), Spotted seal (FOOD00423), Butterfat (FOOD00760), Margarine (FOOD00843), Margarine-like spread (FOOD00844), Northern bluefin tuna (FOOD00305), Butter (FOOD00648)
DB00125	Arginine	FDB013828	Retinol	DDI type 26	The risk or severity of adverse effects can be increased when Retinol is combined with Arginine.	0.99898	TRUE	TRUE	Haddock (FOOD00374), Gadus (Common cod) (FOOD00515), Anatidae (FOOD00576), Anguilliformes (FOOD00577), Spotted seal (FOOD00423), Butterfat (FOOD00760), Margarine (FOOD00843), Margarine-like spread (FOOD00844), Northern bluefin tuna (FOOD00305), Butter (FOOD00648)
DB00125	Arginine	FDB013868	4-Isopropyl-2-methoxy-1-methylbenzene	DDI type 26	The risk or severity of adverse effects can be increased when Arginine is combined with 4-Isopropyl-2-methoxy-1-methylbenzene.	0.999841	TRUE	TRUE	Pot marjoram (FOOD00123)
DB00125	Arginine	FDB013868	4-Isopropyl-2-methoxy-1-methylbenzene	DDI type 26	The risk or severity of adverse effects can be increased when 4-Isopropyl-2-methoxy-1-methylbenzene is combined with Arginine.	0.997001	TRUE	TRUE	Pot marjoram (FOOD00123)
DB00125	Arginine	FDB013875	Dimethylmatairesinol	DDI type 26	The risk or severity of adverse effects can be increased when Arginine is combined with Dimethylmatairesinol.	0.999779	TRUE	TRUE	Sesame (FOOD00170)
DB00125	Arginine	FDB013875	Dimethylmatairesinol	DDI type 26	The risk or severity of adverse effects can be increased when Dimethylmatairesinol is combined with Arginine.	0.99988	TRUE	TRUE	Sesame (FOOD00170)
DB00125	Arginine	FDB013897	Hexanoic acid	DDI type 26	The risk or severity of adverse effects can be increased when Hexanoic acid is combined with Arginine.	0.999495	TRUE	TRUE	Butterfat (FOOD00760), Butter (FOOD00648), Cream (FOOD00650), Margarine-like spread (FOOD00844), Coconut (FOOD00336), Cheese (FOOD00617), Dried milk (FOOD00689), Processed cheese (FOOD00711), Babassu palm (FOOD00773), Dulce de leche (FOOD00714)
DB00125	Arginine	FDB014346	Hexanenitrile	DDI type 26	The risk or severity of adverse effects can be increased when Arginine is combined with Hexanenitrile.	0.997557	TRUE	TRUE	Kohlrabi (FOOD00033)
DB00125	Arginine	FDB014346	Hexanenitrile	DDI type 26	The risk or severity of adverse effects can be increased when Hexanenitrile is combined with Arginine.	0.99938	TRUE	TRUE	Kohlrabi (FOOD00033)
DB00125	Arginine	FDB014490	Citronellol	DDI type 26	The risk or severity of adverse effects can be increased when Arginine is combined with Citronellol.	0.999944	TRUE	TRUE	Ginger (FOOD00206), Sweet basil (FOOD00119), Lemon balm (FOOD00108), Cardamom (FOOD00074), Mandarin orange (Clementine, Tangerine) (FOOD00056), Coriander (FOOD00061), Highbush blueberry (FOOD00191), Bilberry (FOOD00193)
DB00125	Arginine	FDB014490	Citronellol	DDI type 26	The risk or severity of adverse effects can be increased when Citronellol is combined with Arginine.	0.983466	TRUE	TRUE	Ginger (FOOD00206), Sweet basil (FOOD00119), Lemon balm (FOOD00108), Cardamom (FOOD00074), Mandarin orange (Clementine, Tangerine) (FOOD00056), Coriander (FOOD00061), Highbush blueberry (FOOD00191), Bilberry (FOOD00193)
DB00125	Arginine	FDB014504	Folic acid	DDI type 26	The risk or severity of adverse effects can be increased when Folic acid is combined with Arginine.	0.984477	TRUE	TRUE	Jute (FOOD00389), Spinach (FOOD00178), Leavening agent (FOOD00661), Garland chrysanthemum (FOOD00333), Endive (FOOD00048), Cabbage (FOOD00851), Parsley (FOOD00131), Asparagus (FOOD00021), Sour cherry (FOOD00146), Yardlong bean (FOOD00540)
DB00125	Arginine	FDB014512	5-Isopropyl-2-methylphenol	DDI type 26	The risk or severity of adverse effects can be increased when Arginine is combined with 5-Isopropyl-2-methylphenol.	0.979759	TRUE	TRUE	Pot marjoram (FOOD00123), Common thyme (FOOD00183), Black walnut (FOOD00093), Sweet marjoram (FOOD00122), Summer savory (FOOD00167), Common oregano (FOOD00124), Corn (FOOD00205), Rosemary (FOOD00159), Hyssop (FOOD00089)
DB00125	Arginine	FDB014512	5-Isopropyl-2-methylphenol	DDI type 26	The risk or severity of adverse effects can be increased when 5-Isopropyl-2-methylphenol is combined with Arginine.	0.992496	TRUE	TRUE	Pot marjoram (FOOD00123), Common thyme (FOOD00183), Black walnut (FOOD00093), Sweet marjoram (FOOD00122), Summer savory (FOOD00167), Common oregano (FOOD00124), Corn (FOOD00205), Rosemary (FOOD00159), Hyssop (FOOD00089)
DB00125	Arginine	FDB014580	(+)-Borneol	DDI type 26	The risk or severity of adverse effects can be increased when Arginine is combined with (+)-Borneol.	0.99048	TRUE	TRUE	Nutmeg (FOOD00118), Ginger (FOOD00206)
DB00125	Arginine	FDB014580	(+)-Borneol	DDI type 26	The risk or severity of adverse effects can be increased when (+)-Borneol is combined with Arginine.	0.999863	TRUE	TRUE	Nutmeg (FOOD00118), Ginger (FOOD00206)
DB00125	Arginine	FDB014582	(R)-Citronellal	DDI type 26	The risk or severity of adverse effects can be increased when Arginine is combined with (R)-Citronellal.	0.999798	TRUE	TRUE	Lemon balm (FOOD00108)
DB00125	Arginine	FDB014607	Citronellic acid	DDI type 26	The risk or severity of adverse effects can be increased when Citronellic acid is combined with Arginine.	0.998641	TRUE	TRUE	Lemon balm (FOOD00108), Peppermint (FOOD00113)
DB00125	Arginine	FDB014617	Citronellal	DDI type 26	The risk or severity of adverse effects can be increased when Arginine is combined with Citronellal.	0.999798	TRUE	TRUE	Lemon balm (FOOD00108), Lime (FOOD00053), Ginger (FOOD00206), Sweet orange (FOOD00057), Mandarin orange (Clementine, Tangerine) (FOOD00056)
DB00125	Arginine	FDB014795	2-Isopropyl-5-methylphenol	DDI type 26	The risk or severity of adverse effects can be increased when Arginine is combined with 2-Isopropyl-5-methylphenol.	0.972492	TRUE	TRUE	Black walnut (FOOD00093), Common thyme (FOOD00183), Common oregano (FOOD00124), Sweet basil (FOOD00119), Pot marjoram (FOOD00123), Mandarin orange (Clementine, Tangerine) (FOOD00056), Spearmint (FOOD00112), Hyssop (FOOD00089)
DB00125	Arginine	FDB014795	2-Isopropyl-5-methylphenol	DDI type 26	The risk or severity of adverse effects can be increased when 2-Isopropyl-5-methylphenol is combined with Arginine.	0.994035	TRUE	TRUE	Black walnut (FOOD00093), Common thyme (FOOD00183), Common oregano (FOOD00124), Sweet basil (FOOD00119), Pot marjoram (FOOD00123), Mandarin orange (Clementine, Tangerine) (FOOD00056), Spearmint (FOOD00112), Hyssop (FOOD00089)
DB00125	Arginine	FDB014797	Thymol methyl ether	DDI type 26	The risk or severity of adverse effects can be increased when Arginine is combined with Thymol methyl ether.	0.999832	TRUE	TRUE	Common thyme (FOOD00183), Common oregano (FOOD00124), Mandarin orange (Clementine, Tangerine) (FOOD00056), Lime (FOOD00053), Sweet basil (FOOD00119)
DB00125	Arginine	FDB014797	Thymol methyl ether	DDI type 26	The risk or severity of adverse effects can be increased when Thymol methyl ether is combined with Arginine.	0.997819	TRUE	TRUE	Common thyme (FOOD00183), Common oregano (FOOD00124), Mandarin orange (Clementine, Tangerine) (FOOD00056), Lime (FOOD00053), Sweet basil (FOOD00119)
DB00125	Arginine	FDB014823	Acetylursolic acid	DDI type 26	The risk or severity of adverse effects can be increased when Acetylursolic acid is combined with Arginine.	0.986235	TRUE	TRUE	Rosemary (FOOD00159)
DB00125	Arginine	FDB014940	Linalool	DDI type 26	The risk or severity of adverse effects can be increased when Arginine is combined with Linalool.	0.99984	TRUE	TRUE	Spearmint (FOOD00112), Coriander (FOOD00061), Common thyme (FOOD00183), Cardamom (FOOD00074), Sweet basil (FOOD00119), Orange mint (FOOD00110), Sweet bay (FOOD00097), Common sage (FOOD00165), Turmeric (FOOD00068), Star anise (FOOD00090)
DB00125	Arginine	FDB014940	Linalool	DDI type 26	The risk or severity of adverse effects can be increased when Linalool is combined with Arginine.	0.999936	TRUE	TRUE	Spearmint (FOOD00112), Coriander (FOOD00061), Common thyme (FOOD00183), Cardamom (FOOD00074), Sweet basil (FOOD00119), Orange mint (FOOD00110), Sweet bay (FOOD00097), Common sage (FOOD00165), Turmeric (FOOD00068), Star anise (FOOD00090)
DB00125	Arginine	FDB014942	D-Linalool	DDI type 26	The risk or severity of adverse effects can be increased when Arginine is combined with D-Linalool.	0.99984	TRUE	TRUE	Sweet marjoram (FOOD00122)
DB00125	Arginine	FDB014942	D-Linalool	DDI type 26	The risk or severity of adverse effects can be increased when D-Linalool is combined with Arginine.	0.999936	TRUE	TRUE	Sweet marjoram (FOOD00122)
DB00125	Arginine	FDB015199	Nordihydrocapsaicin	DDI type 26	The risk or severity of adverse effects can be increased when Arginine is combined with Nordihydrocapsaicin.	0.955311	TRUE	TRUE	Green bell pepper (FOOD00877), Orange bell pepper (FOOD00879), Pepper (FOOD00040), Red bell pepper (FOOD00880), Yellow bell pepper (FOOD00878), Pepper (C. frutescens) (FOOD00428)
DB00125	Arginine	FDB015201	Homodihydrocapsaicin	DDI type 6	The metabolism of Arginine can be decreased when combined with Homodihydrocapsaicin.	0.967891	TRUE	FALSE	Green bell pepper (FOOD00877), Orange bell pepper (FOOD00879), Pepper (FOOD00040), Pepper (C. frutescens) (FOOD00428), Red bell pepper (FOOD00880), Yellow bell pepper (FOOD00878)
DB00125	Arginine	FDB015352	Geosmin	DDI type 26	The risk or severity of adverse effects can be increased when Arginine is combined with Geosmin.	0.951089	TRUE	TRUE	Corn (FOOD00205)
DB00125	Arginine	FDB015352	Geosmin	DDI type 26	The risk or severity of adverse effects can be increased when Geosmin is combined with Arginine.	0.999711	TRUE	TRUE	Corn (FOOD00205)
DB00125	Arginine	FDB015469	beta-Ionone	DDI type 26	The risk or severity of adverse effects can be increased when Arginine is combined with beta-Ionone.	0.999118	TRUE	TRUE	Corn (FOOD00205), Black tea (FOOD00907), Green tea (FOOD00908), Herbal tea (FOOD00989), Red tea (FOOD00925), Tea (FOOD00038), Carrot (FOOD00245), Wild carrot (FOOD00072), Common oregano (FOOD00124), Hyssop (FOOD00089)
DB00125	Arginine	FDB015469	beta-Ionone	DDI type 26	The risk or severity of adverse effects can be increased when beta-Ionone is combined with Arginine.	0.999774	TRUE	TRUE	Corn (FOOD00205), Black tea (FOOD00907), Green tea (FOOD00908), Herbal tea (FOOD00989), Red tea (FOOD00925), Tea (FOOD00038), Carrot (FOOD00245), Wild carrot (FOOD00072), Common oregano (FOOD00124), Hyssop (FOOD00089)
DB00125	Arginine	FDB015503	Cycloartenol	DDI type 26	The risk or severity of adverse effects can be increased when Cycloartenol is combined with Arginine.	0.985774	TRUE	TRUE	Evening primrose (FOOD00120)
DB00125	Arginine	FDB015552	Sinensetin	DDI type 26	The risk or severity of adverse effects can be increased when Arginine is combined with Sinensetin.	0.999864	TRUE	TRUE	Sweet orange (FOOD00057)
DB00125	Arginine	FDB015552	Sinensetin	DDI type 26	The risk or severity of adverse effects can be increased when Sinensetin is combined with Arginine.	0.997884	TRUE	TRUE	Sweet orange (FOOD00057)
DB00125	Arginine	FDB015831	Phytoene	DDI type 13	The therapeutic efficacy of Arginine can be decreased when used in combination with Phytoene.	0.941309	TRUE	FALSE	Sweet potato (FOOD00092), Sweet orange (FOOD00057)
DB00125	Arginine	FDB016033	1-Isopropyl-3-methylbenzene	DDI type 26	The risk or severity of adverse effects can be increased when Arginine is combined with 1-Isopropyl-3-methylbenzene.	0.999296	TRUE	TRUE	Sweet basil (FOOD00119), Blackcurrant (FOOD00155)
DB00125	Arginine	FDB016033	1-Isopropyl-3-methylbenzene	DDI type 26	The risk or severity of adverse effects can be increased when 1-Isopropyl-3-methylbenzene is combined with Arginine.	0.999231	TRUE	TRUE	Sweet basil (FOOD00119), Blackcurrant (FOOD00155)
DB00125	Arginine	FDB016232	Methyl citronellate	DDI type 26	The risk or severity of adverse effects can be increased when Arginine is combined with Methyl citronellate.	0.999699	TRUE	TRUE	Lemon balm (FOOD00108)
DB00125	Arginine	FDB017346	1,7,7-Trimethyltricyclo[2.2.1.02,6]heptane	DDI type 26	The risk or severity of adverse effects can be increased when Arginine is combined with 1,7,7-Trimethyltricyclo[2.2.1.02,6]heptane.	0.999579	TRUE	TRUE	Ginger (FOOD00206), Common sage (FOOD00165), Pot marjoram (FOOD00123)
DB00125	Arginine	FDB017346	1,7,7-Trimethyltricyclo[2.2.1.02,6]heptane	DDI type 26	The risk or severity of adverse effects can be increased when 1,7,7-Trimethyltricyclo[2.2.1.02,6]heptane is combined with Arginine.	0.999741	TRUE	TRUE	Ginger (FOOD00206), Common sage (FOOD00165), Pot marjoram (FOOD00123)
DB00125	Arginine	FDB017358	1-Isopropyl-4-methylbenzene	DDI type 26	The risk or severity of adverse effects can be increased when Arginine is combined with 1-Isopropyl-4-methylbenzene.	0.999654	TRUE	TRUE	Cardamom (FOOD00074), Common thyme (FOOD00183), Cumin (FOOD00067), Summer savory (FOOD00167), Dill (FOOD00013), Common oregano (FOOD00124), Turmeric (FOOD00068), Cornmint (FOOD00111), Pot marjoram (FOOD00123), Ginger (FOOD00206)
DB00125	Arginine	FDB017358	1-Isopropyl-4-methylbenzene	DDI type 26	The risk or severity of adverse effects can be increased when 1-Isopropyl-4-methylbenzene is combined with Arginine.	0.998993	TRUE	TRUE	Cardamom (FOOD00074), Common thyme (FOOD00183), Cumin (FOOD00067), Summer savory (FOOD00167), Dill (FOOD00013), Common oregano (FOOD00124), Turmeric (FOOD00068), Cornmint (FOOD00111), Pot marjoram (FOOD00123), Ginger (FOOD00206)
DB00125	Arginine	FDB017434	Xanthorrhizol	DDI type 26	The risk or severity of adverse effects can be increased when Arginine is combined with Xanthorrhizol.	0.998366	TRUE	TRUE	Ginger (FOOD00206)
DB00125	Arginine	FDB018227	Heliantriol C	DDI type 26	The risk or severity of adverse effects can be increased when Heliantriol C is combined with Arginine.	0.99946	TRUE	TRUE	Sunflower (FOOD00086)
DB00125	Arginine	FDB019133	Linalyl acetate	DDI type 26	The risk or severity of adverse effects can be increased when Arginine is combined with Linalyl acetate.	0.999601	TRUE	TRUE	Cardamom (FOOD00074), Common sage (FOOD00165), Common thyme (FOOD00183), Cornmint (FOOD00111), Sweet basil (FOOD00119), Common oregano (FOOD00124), Rosemary (FOOD00159), Sweet marjoram (FOOD00122)
DB00125	Arginine	FDB019140	Pentosan polysulfate	DDI type 13	The therapeutic efficacy of Pentosan polysulfate can be decreased when used in combination with Arginine.	0.995772	FALSE	FALSE	Tamarind (FOOD00180), Fig (FOOD00081)
DB00125	Arginine	FDB019140	Pentosan polysulfate	DDI type 26	The risk or severity of adverse effects can be increased when Pentosan polysulfate is combined with Arginine.	0.972056	TRUE	TRUE	Tamarind (FOOD00180), Fig (FOOD00081)
DB00125	Arginine	FDB019876	(±)-3-Octyl acetate	DDI type 26	The risk or severity of adverse effects can be increased when Arginine is combined with (±)-3-Octyl acetate.	0.986564	TRUE	TRUE	Orange mint (FOOD00110)
DB00125	Arginine	FDB019886	4-Ethyl-1,2-benzenediol	DDI type 26	The risk or severity of adverse effects can be increased when Arginine is combined with 4-Ethyl-1,2-benzenediol.	0.960405	TRUE	TRUE	Arabica coffee (FOOD00059), Coffee (FOOD00058), Robusta coffee (FOOD00060), Cocoa powder (FOOD00685), Beer (FOOD00268)
DB00125	Arginine	FDB019887	4-Ethyl-2-methoxyphenol	DDI type 26	The risk or severity of adverse effects can be increased when Arginine is combined with 4-Ethyl-2-methoxyphenol.	0.999858	TRUE	TRUE	Arabica coffee (FOOD00059), Coffee (FOOD00058), Robusta coffee (FOOD00060)
DB00125	Arginine	FDB019921	Ethyl hexanoate	DDI type 26	The risk or severity of adverse effects can be increased when Arginine is combined with Ethyl hexanoate.	0.996458	TRUE	TRUE	Passion fruit (FOOD00128), Pineapple (FOOD00012)
DB00125	Arginine	FDB019921	Ethyl hexanoate	DDI type 26	The risk or severity of adverse effects can be increased when Ethyl hexanoate is combined with Arginine.	0.997067	TRUE	TRUE	Passion fruit (FOOD00128), Pineapple (FOOD00012)
DB00125	Arginine	FDB020050	Pentyl formate	DDI type 26	The risk or severity of adverse effects can be increased when Arginine is combined with Pentyl formate.	0.999454	TRUE	TRUE	Milk (Cow) (FOOD00618)
DB00125	Arginine	FDB020050	Pentyl formate	DDI type 26	The risk or severity of adverse effects can be increased when Pentyl formate is combined with Arginine.	0.998819	TRUE	TRUE	Milk (Cow) (FOOD00618)
DB00125	Arginine	FDB020053	1,2,3-Trimethoxy-5-methylbenzene	DDI type 26	The risk or severity of adverse effects can be increased when 1,2,3-Trimethoxy-5-methylbenzene is combined with Arginine.	0.947732	TRUE	TRUE	Safflower (FOOD00042)
DB00125	Arginine	FDB020161	2-Phenylethyl formate	DDI type 26	The risk or severity of adverse effects can be increased when Arginine is combined with 2-Phenylethyl formate.	0.999965	TRUE	TRUE	Bilberry (FOOD00193)
DB00125	Arginine	FDB020924	Alliofuroside A	DDI type 10	The serum concentration of Alliofuroside A can be increased when it is combined with Arginine.	0.972704	FALSE	FALSE	Garden onion (FOOD00006)
DB00125	Arginine	FDB021621	C18:1, n-9	DDI type 26	The risk or severity of adverse effects can be increased when Arginine is combined with C18:1, n-9.	0.996794	TRUE	TRUE	Rape (FOOD00029), Olive (FOOD00121), Safflower (FOOD00042), Pecan nut (FOOD00044), Other animal fat (FOOD00682), Lard (FOOD00681), Hazelnut (FOOD00376), Tallow (FOOD00674), Cocoa butter (FOOD00684), Peanut (FOOD00016)
DB00125	Arginine	FDB021812	Aminoadipic acid	DDI type 26	The risk or severity of adverse effects can be increased when Aminoadipic acid is combined with Arginine.	0.997665	TRUE	TRUE	Rye (FOOD00169), Wheat (FOOD00561), Broccoli (FOOD00034), Dill (FOOD00013), Sunburst squash (pattypan squash) (FOOD00874), Swiss chard (FOOD00237), Yellow wax bean (FOOD00882), Green zucchini (FOOD00875), Potato (FOOD00175), Green bean (FOOD00883)
DB00125	Arginine	FDB023414	Vernolic acid	DDI type 26	The risk or severity of adverse effects can be increased when Arginine is combined with Vernolic acid.	0.988722	TRUE	TRUE	Rice (FOOD00125)
DB00125	Arginine	FDB023414	Vernolic acid	DDI type 26	The risk or severity of adverse effects can be increased when Vernolic acid is combined with Arginine.	0.989929	TRUE	TRUE	Rice (FOOD00125)
DB00126	Ascorbic acid	FDB000332	7-Hydroxysecoisolariciresinol	DDI type 13	The therapeutic efficacy of Ascorbic acid can be decreased when used in combination with 7-Hydroxysecoisolariciresinol.	0.964945	TRUE	FALSE	Sesame (FOOD00170)
DB00126	Ascorbic acid	FDB000435	N-Methyltyramine	DDI type 9	The serum concentration of N-Methyltyramine can be decreased when it is combined with Ascorbic acid.	0.999266	FALSE	FALSE	Barley (FOOD00088)
DB00126	Ascorbic acid	FDB000435	N-Methyltyramine	DDI type 15	Ascorbic acid may decrease the excretion rate of N-Methyltyramine which could result in a higher serum level.	0.999526	FALSE	FALSE	Barley (FOOD00088)
DB00126	Ascorbic acid	FDB000446	L-Tyrosine	DDI type 26	The risk or severity of adverse effects can be increased when L-Tyrosine is combined with Ascorbic acid.	0.998139	TRUE	TRUE	Milk (Cow) (FOOD00618), Casein (FOOD00659), Other soy product (FOOD00271), Beluga whale (FOOD00300), Red bell pepper (FOOD00880), Buttermilk (FOOD00692), Smelt (FOOD00519), Soy bean (FOOD00085), Spirulina (FOOD00480), Dried milk (FOOD00689)
DB00126	Ascorbic acid	FDB000453	Theophylline	DDI type 26	The risk or severity of adverse effects can be increased when Theophylline is combined with Ascorbic acid.	0.999536	TRUE	TRUE	Cocoa bean (FOOD00182), Black tea (FOOD00907), Green tea (FOOD00908), Herbal tea (FOOD00989), Red tea (FOOD00925), Tea (FOOD00038)
DB00126	Ascorbic acid	FDB000455	Theobromine	DDI type 26	The risk or severity of adverse effects can be increased when Theobromine is combined with Ascorbic acid.	0.999597	TRUE	TRUE	Cocoa powder (FOOD00685), Chocolate (FOOD00687), Cocoa bean (FOOD00182), Coffee mocha (FOOD00743), Icing (FOOD00700), Syrup (FOOD00673), Waffle (FOOD00735), Breakfast cereal (FOOD00270), Nutritional drink (FOOD00754), Black tea (FOOD00907)
DB00126	Ascorbic acid	FDB000558	Alliin	DDI type 26	The risk or severity of adverse effects can be increased when Alliin is combined with Ascorbic acid.	0.999754	TRUE	TRUE	Soft-necked garlic (FOOD00850)
DB00126	Ascorbic acid	FDB000765	Hexane	DDI type 9	The serum concentration of Hexane can be decreased when it is combined with Ascorbic acid.	0.951053	FALSE	FALSE	Kohlrabi (FOOD00033)
DB00126	Ascorbic acid	FDB000768	Pentane	DDI type 13	The therapeutic efficacy of Ascorbic acid can be decreased when used in combination with Pentane.	0.991322	TRUE	FALSE	Kohlrabi (FOOD00033)
DB00126	Ascorbic acid	FDB000842	2,4-Dihydroxybenzoic acid	DDI type 15	2,4-Dihydroxybenzoic acid may decrease the excretion rate of Ascorbic acid which could result in a higher serum level.	0.999271	TRUE	FALSE	American cranberry (FOOD00192), Olive (FOOD00121)
DB00126	Ascorbic acid	FDB000844	Gentisic acid	DDI type 15	Gentisic acid may decrease the excretion rate of Ascorbic acid which could result in a higher serum level.	0.999251	TRUE	FALSE	Tarragon (FOOD00019), Common thyme (FOOD00183), Common sage (FOOD00165), Lemon balm (FOOD00108), Parsley (FOOD00131), Rosemary (FOOD00159), Horseradish (FOOD00018), Sweet basil (FOOD00119), Peanut (FOOD00016), Hyssop (FOOD00089)
DB00126	Ascorbic acid	FDB000845	2,6-Dihydroxybenzoic acid	DDI type 15	2,6-Dihydroxybenzoic acid may decrease the excretion rate of Ascorbic acid which could result in a higher serum level.	0.99961	TRUE	FALSE	Beer (FOOD00268), Olive (FOOD00121)
DB00126	Ascorbic acid	FDB000846	Vanillic acid	DDI type 15	Vanillic acid may decrease the excretion rate of Ascorbic acid which could result in a higher serum level.	0.979779	TRUE	FALSE	Coriander (FOOD00061), Garden onion (FOOD00006), Sweet basil (FOOD00119), Olive (FOOD00121), Common oregano (FOOD00124), Horseradish (FOOD00018), Peanut (FOOD00016), Cocoa powder (FOOD00685), Swiss chard (FOOD00237), Yellow wax bean (FOOD00882)
DB00126	Ascorbic acid	FDB000848	3,5-Dihydroxybenzoic acid	DDI type 15	3,5-Dihydroxybenzoic acid may decrease the excretion rate of Ascorbic acid which could result in a higher serum level.	0.998533	TRUE	FALSE	Beer (FOOD00268)
DB00126	Ascorbic acid	FDB001037	4-Aminobenzoic acid	DDI type 26	The risk or severity of adverse effects can be increased when 4-Aminobenzoic acid is combined with Ascorbic acid.	0.952903	TRUE	TRUE	Pineapple (FOOD00012)
DB00126	Ascorbic acid	FDB001176	Isodulcitol	DDI type 13	The therapeutic efficacy of Isodulcitol can be decreased when used in combination with Ascorbic acid.	0.999398	FALSE	FALSE	Flaxseed (FOOD00101)
DB00126	Ascorbic acid	FDB001202	D-Mannose	DDI type 13	The therapeutic efficacy of D-Mannose can be decreased when used in combination with Ascorbic acid.	0.995008	FALSE	FALSE	Corn (FOOD00205)
DB00126	Ascorbic acid	FDB001304	alpha1-Sitosterol	DDI type 15	alpha1-Sitosterol may decrease the excretion rate of Ascorbic acid which could result in a higher serum level.	0.996354	TRUE	FALSE	Evening primrose (FOOD00120)
DB00126	Ascorbic acid	FDB001304	alpha1-Sitosterol	DDI type 13	The therapeutic efficacy of Ascorbic acid can be decreased when used in combination with alpha1-Sitosterol.	0.97657	TRUE	FALSE	Evening primrose (FOOD00120)
DB00126	Ascorbic acid	FDB001361	Ostreasterol	DDI type 15	Ostreasterol may decrease the excretion rate of Ascorbic acid which could result in a higher serum level.	0.997013	TRUE	FALSE	Common walnut (FOOD00094)
DB00126	Ascorbic acid	FDB001512	1,2-Benzenediol	DDI type 15	1,2-Benzenediol may decrease the excretion rate of Ascorbic acid which could result in a higher serum level.	0.996992	TRUE	FALSE	Arabica coffee (FOOD00059), Coffee (FOOD00058), Robusta coffee (FOOD00060), Cocoa powder (FOOD00685), Beer (FOOD00268)
DB00126	Ascorbic acid	FDB001850	Stigmast-7-en-3-ol	DDI type 13	The therapeutic efficacy of Ascorbic acid can be decreased when used in combination with Stigmast-7-en-3-ol.	0.980485	TRUE	FALSE	Common walnut (FOOD00094)
DB00126	Ascorbic acid	FDB002119	6-Propyltridecane	DDI type 13	The therapeutic efficacy of Ascorbic acid can be decreased when used in combination with 6-Propyltridecane.	0.999386	TRUE	FALSE	Black walnut (FOOD00093)
DB00126	Ascorbic acid	FDB002412	Tangeritin	DDI type 26	The risk or severity of adverse effects can be increased when Ascorbic acid is combined with Tangeritin.	0.99963	TRUE	TRUE	Sweet orange (FOOD00057)
DB00126	Ascorbic acid	FDB003051	Cetyl alcohol	DDI type 26	The risk or severity of adverse effects can be increased when Cetyl alcohol is combined with Ascorbic acid.	0.999576	TRUE	TRUE	Kohlrabi (FOOD00033)
DB00126	Ascorbic acid	FDB003107	Coronaric acid	DDI type 26	The risk or severity of adverse effects can be increased when Coronaric acid is combined with Ascorbic acid.	0.99909	TRUE	TRUE	Rice (FOOD00125)
DB00126	Ascorbic acid	FDB003598	17alpha-ethynylestradiol	DDI type 15	17alpha-ethynylestradiol may decrease the excretion rate of Ascorbic acid which could result in a higher serum level.	0.966035	TRUE	FALSE	Cloves (FOOD00179), Cardamom (FOOD00074), Ginkgo nuts (FOOD00367), Nutmeg (FOOD00118), Star anise (FOOD00090), Ginger (FOOD00206), Ceylon cinnamon (FOOD00051), Cumin (FOOD00067), Pot marjoram (FOOD00123), Anise (FOOD00137)
DB00126	Ascorbic acid	FDB003598	17alpha-ethynylestradiol	DDI type 9	The serum concentration of Ascorbic acid can be decreased when it is combined with 17alpha-ethynylestradiol.	0.999277	TRUE	FALSE	Cloves (FOOD00179), Cardamom (FOOD00074), Ginkgo nuts (FOOD00367), Nutmeg (FOOD00118), Star anise (FOOD00090), Ginger (FOOD00206), Ceylon cinnamon (FOOD00051), Cumin (FOOD00067), Pot marjoram (FOOD00123), Anise (FOOD00137)
DB00126	Ascorbic acid	FDB003668	Prostaglandin A-1	DDI type 26	The risk or severity of adverse effects can be increased when Prostaglandin A-1 is combined with Ascorbic acid.	0.990247	TRUE	TRUE	Garden onion (FOOD00006)
DB00126	Ascorbic acid	FDB003685	S-Allylmercaptocysteine	DDI type 26	The risk or severity of adverse effects can be increased when S-Allylmercaptocysteine is combined with Ascorbic acid.	0.999602	TRUE	TRUE	Soft-necked garlic (FOOD00850)
DB00126	Ascorbic acid	FDB003693	Salicylates	DDI type 15	Salicylates may decrease the excretion rate of Ascorbic acid which could result in a higher serum level.	0.997374	TRUE	FALSE	Common thyme (FOOD00183), Turmeric (FOOD00068), Peppermint (FOOD00113), Rosemary (FOOD00159), Mandarin orange (Clementine, Tangerine) (FOOD00056), Colorado pinyon (FOOD00433), Common walnut (FOOD00094), Pomegranate (FOOD00151)
DB00126	Ascorbic acid	FDB003771	Gadoleic acid	DDI type 26	The risk or severity of adverse effects can be increased when Gadoleic acid is combined with Ascorbic acid.	0.998897	TRUE	TRUE	Fish oil (FOOD00990), Other fish product (FOOD00665), Lumpsucker (FOOD00585), White mustard (FOOD00413), Greenland halibut/turbot (FOOD00370), Scombridae (Bonito, Mackerel, Tuna) (FOOD00586), Gadus (Common cod) (FOOD00515), Anguilliformes (FOOD00577), Rape (FOOD00029), Colorado pinyon (FOOD00433)
DB00126	Ascorbic acid	FDB003797	Esters	DDI type 13	The therapeutic efficacy of Ascorbic acid can be decreased when used in combination with Esters.	0.964639	TRUE	FALSE	Pineapple (FOOD00012)
DB00126	Ascorbic acid	FDB004090	Atropine	DDI type 13	The therapeutic efficacy of Ascorbic acid can be decreased when used in combination with Atropine.	0.995214	TRUE	FALSE	Burdock (FOOD00017)
DB00126	Ascorbic acid	FDB004105	1-Heptadecene	DDI type 13	The therapeutic efficacy of Ascorbic acid can be decreased when used in combination with 1-Heptadecene.	0.9972	TRUE	FALSE	Safflower (FOOD00042)
DB00126	Ascorbic acid	FDB004212	delta-5-Avenasterol	DDI type 15	delta-5-Avenasterol may decrease the excretion rate of Ascorbic acid which could result in a higher serum level.	0.998934	TRUE	FALSE	Common walnut (FOOD00094)
DB00126	Ascorbic acid	FDB004234	Melatonin	DDI type 9	The serum concentration of Melatonin can be decreased when it is combined with Ascorbic acid.	0.964148	FALSE	FALSE	Corn (FOOD00205)
DB00126	Ascorbic acid	FDB004234	Melatonin	DDI type 26	The risk or severity of adverse effects can be increased when Melatonin is combined with Ascorbic acid.	0.989495	TRUE	TRUE	Corn (FOOD00205)
DB00126	Ascorbic acid	FDB004676	Heptadecanoic acid	DDI type 26	The risk or severity of adverse effects can be increased when Heptadecanoic acid is combined with Ascorbic acid.	0.999308	TRUE	TRUE	Cinnamon (FOOD00572), Cattle (Beef, Veal) (FOOD00495), Sturgeon (FOOD00570), Crab (FOOD00573), Sausage (FOOD00652), Rabbit (FOOD00528), Cashew nut (FOOD00011), Oyster mushroom (FOOD00553), Clawed lobster (FOOD00584), Atlantic halibut (FOOD00516)
DB00126	Ascorbic acid	FDB004731	N-Tetradecane	DDI type 13	The therapeutic efficacy of Ascorbic acid can be decreased when used in combination with N-Tetradecane.	0.99986	TRUE	FALSE	Black walnut (FOOD00093)
DB00126	Ascorbic acid	FDB005482	Glycosides	DDI type 10	The serum concentration of Glycosides can be increased when it is combined with Ascorbic acid.	0.996159	FALSE	FALSE	Apricot (FOOD00144), Fig (FOOD00081)
DB00126	Ascorbic acid	FDB005802	Calamene	DDI type 26	The risk or severity of adverse effects can be increased when Ascorbic acid is combined with Calamene.	0.969336	TRUE	TRUE	Star anise (FOOD00090), Common sage (FOOD00165)
DB00126	Ascorbic acid	FDB005802	Calamene	DDI type 26	The risk or severity of adverse effects can be increased when Calamene is combined with Ascorbic acid.	0.989463	TRUE	TRUE	Star anise (FOOD00090), Common sage (FOOD00165)
DB00126	Ascorbic acid	FDB005827	3-Methyltridecane	DDI type 13	The therapeutic efficacy of Ascorbic acid can be decreased when used in combination with 3-Methyltridecane.	0.999894	TRUE	FALSE	Black walnut (FOOD00093)
DB00126	Ascorbic acid	FDB006154	5-Methylheptan-3-one	DDI type 9	The serum concentration of 5-Methylheptan-3-one can be decreased when it is combined with Ascorbic acid.	0.999922	FALSE	FALSE	Peppermint (FOOD00113)
DB00126	Ascorbic acid	FDB006154	5-Methylheptan-3-one	DDI type 13	The therapeutic efficacy of Ascorbic acid can be decreased when used in combination with 5-Methylheptan-3-one.	0.99037	TRUE	FALSE	Peppermint (FOOD00113)
DB00126	Ascorbic acid	FDB006381	(11R,12S,13S)-Epoxy-hydroxyoctadeca-cis-9-cis-15-dien-1-oic acid	DDI type 26	The risk or severity of adverse effects can be increased when (11R,12S,13S)-Epoxy-hydroxyoctadeca-cis-9-cis-15-dien-1-oic acid is combined with Ascorbic acid.	0.987318	TRUE	TRUE	Rice (FOOD00125)
DB00126	Ascorbic acid	FDB006382	(11S,12S,13S)-Epoxy-hydroxyoctadeca-cis-9-cis-15-dien-1-oic acid	DDI type 26	The risk or severity of adverse effects can be increased when (11S,12S,13S)-Epoxy-hydroxyoctadeca-cis-9-cis-15-dien-1-oic acid is combined with Ascorbic acid.	0.987318	TRUE	TRUE	Rice (FOOD00125)
DB00126	Ascorbic acid	FDB007498	Diethylstilbesterol	DDI type 9	The serum concentration of Ascorbic acid can be decreased when it is combined with Diethylstilbesterol.	0.998513	TRUE	FALSE	Gram bean (FOOD00199)
DB00126	Ascorbic acid	FDB007640	6,10,14-Trimethylpentadecan-2-one	DDI type 13	The therapeutic efficacy of Ascorbic acid can be decreased when used in combination with 6,10,14-Trimethylpentadecan-2-one.	0.972631	TRUE	FALSE	Common oregano (FOOD00124)
DB00126	Ascorbic acid	FDB008073	3-Hexanol	DDI type 9	The serum concentration of 3-Hexanol can be decreased when it is combined with Ascorbic acid.	0.975093	FALSE	FALSE	Safflower (FOOD00042)
DB00126	Ascorbic acid	FDB008230	1-Pentanol	DDI type 26	The risk or severity of adverse effects can be increased when 1-Pentanol is combined with Ascorbic acid.	0.999747	TRUE	TRUE	Black walnut (FOOD00093), Common thyme (FOOD00183), Black tea (FOOD00907), Green tea (FOOD00908), Herbal tea (FOOD00989), Red tea (FOOD00925), Tea (FOOD00038), Milk (Cow) (FOOD00618), Safflower (FOOD00042), Bilberry (FOOD00193)
DB00126	Ascorbic acid	FDB008739	Benzoic acid	DDI type 15	Benzoic acid may decrease the excretion rate of Ascorbic acid which could result in a higher serum level.	0.961956	TRUE	FALSE	American cranberry (FOOD00192), Italian sweet red pepper (FOOD00881), Garden onion (FOOD00006), Dill (FOOD00013), Broccoli (FOOD00034), Parsnip (FOOD00129), Green zucchini (FOOD00875), Cocoa powder (FOOD00685), Milk (Cow) (FOOD00618), Cucumber (FOOD00065)
DB00126	Ascorbic acid	FDB010504	4-Hydroxybenzaldehyde	DDI type 15	4-Hydroxybenzaldehyde may decrease the excretion rate of Ascorbic acid which could result in a higher serum level.	0.999928	TRUE	FALSE	Vinegar (FOOD00628), Oat (FOOD00022)
DB00126	Ascorbic acid	FDB010507	3-Hydroxybenzoic acid	DDI type 15	3-Hydroxybenzoic acid may decrease the excretion rate of Ascorbic acid which could result in a higher serum level.	0.999952	TRUE	FALSE	American cranberry (FOOD00192), Beer (FOOD00268)
DB00126	Ascorbic acid	FDB010508	4-Hydroxybenzoic acid	DDI type 15	4-Hydroxybenzoic acid may decrease the excretion rate of Ascorbic acid which could result in a higher serum level.	0.999951	TRUE	FALSE	Red huckleberry (FOOD00223), Rabbiteye blueberry (FOOD00898), Coriander (FOOD00061), Garden onion (FOOD00006), Loquat (FOOD00076), Highbush blueberry (FOOD00191), Olive (FOOD00121), Strawberry (FOOD00083), Swiss chard (FOOD00237), Carrot (FOOD00245)
DB00126	Ascorbic acid	FDB010539	2-Vinylphenol	DDI type 15	2-Vinylphenol may decrease the excretion rate of Ascorbic acid which could result in a higher serum level.	0.999722	TRUE	FALSE	Ceylon cinnamon (FOOD00051)
DB00126	Ascorbic acid	FDB010581	N-Methylphenethylamine	DDI type 9	The serum concentration of N-Methylphenethylamine can be decreased when it is combined with Ascorbic acid.	0.997713	FALSE	FALSE	Cabbage (FOOD00851), White cabbage (FOOD00887), Carrot (FOOD00245), Wild carrot (FOOD00072), Apple (FOOD00105), Corn (FOOD00205)
DB00126	Ascorbic acid	FDB010581	N-Methylphenethylamine	DDI type 15	Ascorbic acid may decrease the excretion rate of N-Methylphenethylamine which could result in a higher serum level.	0.998592	FALSE	FALSE	Cabbage (FOOD00851), White cabbage (FOOD00887), Carrot (FOOD00245), Wild carrot (FOOD00072), Apple (FOOD00105), Corn (FOOD00205)
DB00126	Ascorbic acid	FDB010873	1-(4-Methoxyphenyl)-2-propanone	DDI type 15	1-(4-Methoxyphenyl)-2-propanone may decrease the excretion rate of Ascorbic acid which could result in a higher serum level.	0.99944	TRUE	FALSE	Anise (FOOD00137)
DB00126	Ascorbic acid	FDB010873	1-(4-Methoxyphenyl)-2-propanone	DDI type 13	The therapeutic efficacy of Ascorbic acid can be decreased when used in combination with 1-(4-Methoxyphenyl)-2-propanone.	0.982561	TRUE	FALSE	Anise (FOOD00137)
DB00126	Ascorbic acid	FDB011258	o-Coumaric acid	DDI type 15	o-Coumaric acid may decrease the excretion rate of Ascorbic acid which could result in a higher serum level.	0.984241	TRUE	FALSE	Corn (FOOD00205), Hard wheat (FOOD00242), Olive (FOOD00121), American cranberry (FOOD00192), Fennel (FOOD00082), Date (FOOD00135), Peanut (FOOD00016), Common wheat (FOOD00187), Beer (FOOD00268), Grape wine (FOOD00612)
DB00126	Ascorbic acid	FDB011546	24-Methylenelophenol	DDI type 15	24-Methylenelophenol may decrease the excretion rate of Ascorbic acid which could result in a higher serum level.	0.965961	TRUE	FALSE	Evening primrose (FOOD00120)
DB00126	Ascorbic acid	FDB011952	Hexadecane	DDI type 13	The therapeutic efficacy of Ascorbic acid can be decreased when used in combination with Hexadecane.	0.998518	TRUE	FALSE	Black walnut (FOOD00093)
DB00126	Ascorbic acid	FDB012059	Benzylamine	DDI type 15	Ascorbic acid may decrease the excretion rate of Benzylamine which could result in a higher serum level.	0.984519	FALSE	FALSE	Corn (FOOD00205), Cabbage (FOOD00851), White cabbage (FOOD00887), Carrot (FOOD00245), Wild carrot (FOOD00072), Apple (FOOD00105)
DB00126	Ascorbic acid	FDB012060	3,4-Dihydroxybenzaldehyde	DDI type 15	3,4-Dihydroxybenzaldehyde may decrease the excretion rate of Ascorbic acid which could result in a higher serum level.	0.992988	TRUE	FALSE	Vinegar (FOOD00628), Grape wine (FOOD00612)
DB00126	Ascorbic acid	FDB012122	Cholestanol	DDI type 15	Cholestanol may decrease the excretion rate of Ascorbic acid which could result in a higher serum level.	0.99513	TRUE	FALSE	Common walnut (FOOD00094)
DB00126	Ascorbic acid	FDB012122	Cholestanol	DDI type 13	The therapeutic efficacy of Ascorbic acid can be decreased when used in combination with Cholestanol.	0.995184	TRUE	FALSE	Common walnut (FOOD00094)
DB00126	Ascorbic acid	FDB012171	Eugenol	DDI type 15	Eugenol may decrease the excretion rate of Ascorbic acid which could result in a higher serum level.	0.996479	TRUE	FALSE	Cloves (FOOD00179), Allspice (FOOD00287), Carrot (FOOD00245), Wild carrot (FOOD00072), Sweet basil (FOOD00119), Turmeric (FOOD00068), Ceylon cinnamon (FOOD00051), Sweet marjoram (FOOD00122), Sweet bay (FOOD00097), Hyssop (FOOD00089)
DB00126	Ascorbic acid	FDB012200	2,3-Dihydroxybenzoic acid	DDI type 15	2,3-Dihydroxybenzoic acid may decrease the excretion rate of Ascorbic acid which could result in a higher serum level.	0.999546	TRUE	FALSE	Cucumber (FOOD00065), Broccoli (FOOD00034), Dill (FOOD00013), Romaine lettuce (FOOD00888), Yellow wax bean (FOOD00882), Garden onion (FOOD00006), Carrot (FOOD00245), Yellow bell pepper (FOOD00878), American cranberry (FOOD00192), Italian sweet red pepper (FOOD00881)
DB00126	Ascorbic acid	FDB012268	Isopropylbenzene	DDI type 9	The serum concentration of Isopropylbenzene can be decreased when it is combined with Ascorbic acid.	0.995077	FALSE	FALSE	Ceylon cinnamon (FOOD00051), Ginger (FOOD00206)
DB00126	Ascorbic acid	FDB012362	beta-Sitosterol	DDI type 13	The therapeutic efficacy of Ascorbic acid can be decreased when used in combination with beta-Sitosterol.	0.97307	TRUE	FALSE	Cherimoya (FOOD00326), Canola (FOOD00772), Margarine (FOOD00843), Sesame (FOOD00170), Flaxseed (FOOD00101), Pistachio (FOOD00140), Common buckwheat (FOOD00079), Evening primrose (FOOD00120), Sunflower (FOOD00086), Shortening (FOOD00783)
DB00126	Ascorbic acid	FDB012441	Ethyl stearate	DDI type 26	The risk or severity of adverse effects can be increased when Ethyl stearate is combined with Ascorbic acid.	0.993096	TRUE	TRUE	Coriander (FOOD00061)
DB00126	Ascorbic acid	FDB012456	2-Hydroxybenzaldehyde	DDI type 15	2-Hydroxybenzaldehyde may decrease the excretion rate of Ascorbic acid which could result in a higher serum level.	0.999928	TRUE	FALSE	Peppermint (FOOD00113)
DB00126	Ascorbic acid	FDB012459	Methyl salicylate	DDI type 15	Methyl salicylate may decrease the excretion rate of Ascorbic acid which could result in a higher serum level.	0.999734	TRUE	FALSE	Hyssop (FOOD00089), Bilberry (FOOD00193)
DB00126	Ascorbic acid	FDB012521	Campesterol	DDI type 13	The therapeutic efficacy of Ascorbic acid can be decreased when used in combination with Campesterol.	0.979693	TRUE	FALSE	Canola (FOOD00772), Cherimoya (FOOD00326), Flaxseed (FOOD00101), Margarine (FOOD00843), Soy bean (FOOD00085), Sesame (FOOD00170), Shortening (FOOD00783), Opium poppy (FOOD00438), Common buckwheat (FOOD00079), Sunflower (FOOD00086)
DB00126	Ascorbic acid	FDB012528	D-Fructose	DDI type 13	The therapeutic efficacy of D-Fructose can be decreased when used in combination with Ascorbic acid.	0.979275	FALSE	FALSE	Honey (FOOD00626), Agave (FOOD00563), Common grape (FOOD00204), Date (FOOD00135), Molasses (FOOD00786), Turmeric (FOOD00068), Garden onion (FOOD00006), Ketchup (FOOD00756), Jackfruit (FOOD00384), Sugar (FOOD00651)
DB00126	Ascorbic acid	FDB012530	D-Glucose	DDI type 13	The therapeutic efficacy of D-Glucose can be decreased when used in combination with Ascorbic acid.	0.995008	FALSE	FALSE	Honey (FOOD00626), Common grape (FOOD00204), Date (FOOD00135), Molasses (FOOD00786), Ketchup (FOOD00756), Marshmallow (FOOD00662), Jackfruit (FOOD00384), Mamey sapote (FOOD00459), Liquorice (FOOD00627), Muskmelon (FOOD00064)
DB00126	Ascorbic acid	FDB012535	L-Glutamic acid	DDI type 26	The risk or severity of adverse effects can be increased when Ascorbic acid is combined with L-Glutamic acid.	0.986145	TRUE	TRUE	Casein (FOOD00659), Other soy product (FOOD00271), Beluga whale (FOOD00300), Gelatin (FOOD00663), Soy bean (FOOD00085), Gelatin dessert (FOOD00725), Meat bouillon (FOOD00657), Cottonseed (FOOD00341), Buttermilk (FOOD00692), Bearded seal (FOOD00466)
DB00126	Ascorbic acid	FDB012536	Glutamic acid	DDI type 26	The risk or severity of adverse effects can be increased when Ascorbic acid is combined with Glutamic acid.	0.986145	TRUE	TRUE	Red bell pepper (FOOD00880), Milk (Cow) (FOOD00618), Wheat (FOOD00561), Oat (FOOD00022), Rye (FOOD00169), Barley (FOOD00088), Swiss chard (FOOD00237), Red beetroot (FOOD00264), Dill (FOOD00013), White cabbage (FOOD00887)
DB00126	Ascorbic acid	FDB012569	Gondoic acid	DDI type 26	The risk or severity of adverse effects can be increased when Gondoic acid is combined with Ascorbic acid.	0.998897	TRUE	TRUE	Macadamia nut (FOOD00525)
DB00126	Ascorbic acid	FDB012647	N-Methylbenzylamine	DDI type 15	Ascorbic acid may decrease the excretion rate of N-Methylbenzylamine which could result in a higher serum level.	0.970832	FALSE	FALSE	Carrot (FOOD00245), Wild carrot (FOOD00072)
DB00126	Ascorbic acid	FDB012675	S-Allylcysteine	DDI type 26	The risk or severity of adverse effects can be increased when S-Allylcysteine is combined with Ascorbic acid.	0.999628	TRUE	TRUE	Soft-necked garlic (FOOD00850)
DB00126	Ascorbic acid	FDB012732	Vitamin D3	DDI type 26	The risk or severity of adverse effects can be increased when Vitamin D3 is combined with Ascorbic acid.	0.989937	TRUE	TRUE	Common carp (FOOD00322), Lake trout (FOOD00582), Chinook salmon (FOOD00454), Atlantic mackerel (FOOD00293), Swordfish (FOOD00487), Cisco (FOOD00334), Greater sturgeon (FOOD00483), Sockeye salmon (FOOD00453), Rainbow trout (FOOD00444), Pink salmon (FOOD00450)
DB00126	Ascorbic acid	FDB012733	delta7-Avenasterol	DDI type 15	delta7-Avenasterol may decrease the excretion rate of Ascorbic acid which could result in a higher serum level.	0.994624	TRUE	FALSE	Common walnut (FOOD00094)
DB00126	Ascorbic acid	FDB012750	Hordenine	DDI type 15	Ascorbic acid may decrease the excretion rate of Hordenine which could result in a higher serum level.	0.950217	FALSE	FALSE	Barley (FOOD00088)
DB00126	Ascorbic acid	FDB012755	1-(4-Methylphenyl)ethanol	DDI type 15	Ascorbic acid may decrease the excretion rate of 1-(4-Methylphenyl)ethanol which could result in a higher serum level.	0.999532	FALSE	FALSE	Turmeric (FOOD00068)
DB00126	Ascorbic acid	FDB012798	Estrone	DDI type 15	Estrone may decrease the excretion rate of Ascorbic acid which could result in a higher serum level.	0.951962	TRUE	FALSE	Pomegranate (FOOD00151), Apple (FOOD00105)
DB00126	Ascorbic acid	FDB012798	Estrone	DDI type 9	The serum concentration of Ascorbic acid can be decreased when it is combined with Estrone.	0.999425	TRUE	FALSE	Pomegranate (FOOD00151), Apple (FOOD00105)
DB00126	Ascorbic acid	FDB012844	Benzyl benzoate	DDI type 15	Benzyl benzoate may decrease the excretion rate of Ascorbic acid which could result in a higher serum level.	0.996365	TRUE	FALSE	Ceylon cinnamon (FOOD00051)
DB00126	Ascorbic acid	FDB012844	Benzyl benzoate	DDI type 26	The risk or severity of adverse effects can be increased when Benzyl benzoate is combined with Ascorbic acid.	0.966261	TRUE	TRUE	Ceylon cinnamon (FOOD00051)
DB00126	Ascorbic acid	FDB013245	(±)-Phenylalanine	DDI type 26	The risk or severity of adverse effects can be increased when (±)-Phenylalanine is combined with Ascorbic acid.	0.999503	TRUE	TRUE	Red bell pepper (FOOD00880), Wheat (FOOD00561), Oat (FOOD00022), Barley (FOOD00088), Rye (FOOD00169), Dill (FOOD00013), Broccoli (FOOD00034), Japanese pumpkin (FOOD00886), Spinach (FOOD00178), Swiss chard (FOOD00237)
DB00126	Ascorbic acid	FDB013269	Cholesterol	DDI type 15	Cholesterol may decrease the excretion rate of Ascorbic acid which could result in a higher serum level.	0.998154	TRUE	FALSE	Eggs (FOOD00619), Fish oil (FOOD00990), Sturgeon (FOOD00570), Haddock (FOOD00374), Butter (FOOD00648), Anatidae (FOOD00576), Crayfish (FOOD00534), Clawed lobster (FOOD00584), Other fish product (FOOD00665), Tallow (FOOD00674)
DB00126	Ascorbic acid	FDB013612	3-Methylbutyl phenylacetate	DDI type 15	3-Methylbutyl phenylacetate may decrease the excretion rate of Ascorbic acid which could result in a higher serum level.	0.998032	TRUE	FALSE	Peppermint (FOOD00113)
DB00126	Ascorbic acid	FDB013612	3-Methylbutyl phenylacetate	DDI type 13	The therapeutic efficacy of Ascorbic acid can be decreased when used in combination with 3-Methylbutyl phenylacetate.	0.958389	TRUE	FALSE	Peppermint (FOOD00113)
DB00126	Ascorbic acid	FDB013621	2-Phenylethyl pentanoate	DDI type 15	2-Phenylethyl pentanoate may decrease the excretion rate of Ascorbic acid which could result in a higher serum level.	0.999978	TRUE	FALSE	Peppermint (FOOD00113)
DB00126	Ascorbic acid	FDB013828	Retinol	DDI type 26	The risk or severity of adverse effects can be increased when Retinol is combined with Ascorbic acid.	0.980757	TRUE	TRUE	Haddock (FOOD00374), Gadus (Common cod) (FOOD00515), Anatidae (FOOD00576), Anguilliformes (FOOD00577), Spotted seal (FOOD00423), Butterfat (FOOD00760), Margarine (FOOD00843), Margarine-like spread (FOOD00844), Northern bluefin tuna (FOOD00305), Butter (FOOD00648)
DB00126	Ascorbic acid	FDB013897	Hexanoic acid	DDI type 26	The risk or severity of adverse effects can be increased when Hexanoic acid is combined with Ascorbic acid.	0.994601	TRUE	TRUE	Butterfat (FOOD00760), Butter (FOOD00648), Cream (FOOD00650), Margarine-like spread (FOOD00844), Coconut (FOOD00336), Cheese (FOOD00617), Dried milk (FOOD00689), Processed cheese (FOOD00711), Babassu palm (FOOD00773), Dulce de leche (FOOD00714)
DB00126	Ascorbic acid	FDB014373	Ursolic acid	DDI type 15	Ursolic acid may decrease the excretion rate of Ascorbic acid which could result in a higher serum level.	0.949311	TRUE	FALSE	Rosemary (FOOD00159), Common thyme (FOOD00183), Pomegranate (FOOD00151), Hyssop (FOOD00089), Common oregano (FOOD00124), Sweet marjoram (FOOD00122), Bilberry (FOOD00193), Summer savory (FOOD00167), Sweet basil (FOOD00119), Common sage (FOOD00165)
DB00126	Ascorbic acid	FDB014823	Acetylursolic acid	DDI type 15	Acetylursolic acid may decrease the excretion rate of Ascorbic acid which could result in a higher serum level.	0.991502	TRUE	FALSE	Rosemary (FOOD00159)
DB00126	Ascorbic acid	FDB015352	Geosmin	DDI type 13	The therapeutic efficacy of Ascorbic acid can be decreased when used in combination with Geosmin.	0.997645	TRUE	FALSE	Corn (FOOD00205)
DB00126	Ascorbic acid	FDB015469	beta-Ionone	DDI type 26	The risk or severity of adverse effects can be increased when beta-Ionone is combined with Ascorbic acid.	0.973297	TRUE	TRUE	Corn (FOOD00205), Black tea (FOOD00907), Green tea (FOOD00908), Herbal tea (FOOD00989), Red tea (FOOD00925), Tea (FOOD00038), Carrot (FOOD00245), Wild carrot (FOOD00072), Common oregano (FOOD00124), Hyssop (FOOD00089)
DB00126	Ascorbic acid	FDB015503	Cycloartenol	DDI type 15	Cycloartenol may decrease the excretion rate of Ascorbic acid which could result in a higher serum level.	0.989069	TRUE	FALSE	Evening primrose (FOOD00120)
DB00126	Ascorbic acid	FDB015503	Cycloartenol	DDI type 13	The therapeutic efficacy of Ascorbic acid can be decreased when used in combination with Cycloartenol.	0.997055	TRUE	FALSE	Evening primrose (FOOD00120)
DB00126	Ascorbic acid	FDB015552	Sinensetin	DDI type 26	The risk or severity of adverse effects can be increased when Ascorbic acid is combined with Sinensetin.	0.999583	TRUE	TRUE	Sweet orange (FOOD00057)
DB00126	Ascorbic acid	FDB015831	Phytoene	DDI type 13	The therapeutic efficacy of Phytoene can be decreased when used in combination with Ascorbic acid.	0.975253	FALSE	FALSE	Sweet potato (FOOD00092), Sweet orange (FOOD00057)
DB00126	Ascorbic acid	FDB017434	Xanthorrhizol	DDI type 13	The therapeutic efficacy of Ascorbic acid can be decreased when used in combination with Xanthorrhizol.	0.962963	TRUE	FALSE	Ginger (FOOD00206)
DB00126	Ascorbic acid	FDB018227	Heliantriol C	DDI type 13	The therapeutic efficacy of Ascorbic acid can be decreased when used in combination with Heliantriol C.	0.98865	TRUE	FALSE	Sunflower (FOOD00086)
DB00126	Ascorbic acid	FDB019140	Pentosan polysulfate	DDI type 26	The risk or severity of adverse effects can be increased when Pentosan polysulfate is combined with Ascorbic acid.	0.99802	TRUE	TRUE	Tamarind (FOOD00180), Fig (FOOD00081)
DB00126	Ascorbic acid	FDB021586	Vitamin D	DDI type 26	The risk or severity of adverse effects can be increased when Vitamin D is combined with Ascorbic acid.	0.989937	TRUE	TRUE	Haddock (FOOD00374), Gadus (Common cod) (FOOD00515), Maitake (FOOD00555), Common carp (FOOD00322), Lake trout (FOOD00582), Anguilliformes (FOOD00577), Rainbow trout (FOOD00444), Atlantic mackerel (FOOD00293), Salmonidae (Salmon, Trout) (FOOD00493), Swordfish (FOOD00487)
DB00126	Ascorbic acid	FDB021782	25-Hydroxycholecalciferol	DDI type 26	The risk or severity of adverse effects can be increased when 25-Hydroxycholecalciferol is combined with Ascorbic acid.	0.974984	TRUE	TRUE	Sausage (FOOD00652), Other animal fat (FOOD00682), Domestic pig (FOOD00536), Milk (Cow) (FOOD00618)
DB00126	Ascorbic acid	FDB021812	Aminoadipic acid	DDI type 26	The risk or severity of adverse effects can be increased when Ascorbic acid is combined with Aminoadipic acid.	0.989865	TRUE	TRUE	Rye (FOOD00169), Wheat (FOOD00561), Broccoli (FOOD00034), Dill (FOOD00013), Sunburst squash (pattypan squash) (FOOD00874), Swiss chard (FOOD00237), Yellow wax bean (FOOD00882), Green zucchini (FOOD00875), Potato (FOOD00175), Green bean (FOOD00883)
DB00126	Ascorbic acid	FDB021812	Aminoadipic acid	DDI type 26	The risk or severity of adverse effects can be increased when Aminoadipic acid is combined with Ascorbic acid.	0.997728	TRUE	TRUE	Rye (FOOD00169), Wheat (FOOD00561), Broccoli (FOOD00034), Dill (FOOD00013), Sunburst squash (pattypan squash) (FOOD00874), Swiss chard (FOOD00237), Yellow wax bean (FOOD00882), Green zucchini (FOOD00875), Potato (FOOD00175), Green bean (FOOD00883)
DB00126	Ascorbic acid	FDB022621	25-Hydroxyvitamin D2	DDI type 26	The risk or severity of adverse effects can be increased when 25-Hydroxyvitamin D2 is combined with Ascorbic acid.	0.96346	TRUE	TRUE	Milk (Cow) (FOOD00618)
DB00126	Ascorbic acid	FDB022886	Cobalamin	DDI type 13	The therapeutic efficacy of Cobalamin can be decreased when used in combination with Ascorbic acid.	0.998215	FALSE	FALSE	Northern pike (FOOD00431), Oyster mushroom (FOOD00553), Anatidae (FOOD00576), Crab (FOOD00573), Marine mussel (FOOD00587), Common octopus (FOOD00339), Rabbit (FOOD00528), Scombridae (Bonito, Mackerel, Tuna) (FOOD00586), Sturgeon (FOOD00570), Cattle (Beef, Veal) (FOOD00495)
DB00126	Ascorbic acid	FDB023414	Vernolic acid	DDI type 26	The risk or severity of adverse effects can be increased when Vernolic acid is combined with Ascorbic acid.	0.99909	TRUE	TRUE	Rice (FOOD00125)
DB00134	Methionine	FDB000332	7-Hydroxysecoisolariciresinol	DDI type 26	The risk or severity of adverse effects can be increased when Methionine is combined with 7-Hydroxysecoisolariciresinol.	0.988745	TRUE	TRUE	Sesame (FOOD00170)
DB00134	Methionine	FDB000344	Hydroxytyrosol acetate	DDI type 26	The risk or severity of adverse effects can be increased when Methionine is combined with Hydroxytyrosol acetate.	0.963203	TRUE	TRUE	Olive (FOOD00121)
DB00134	Methionine	FDB000357	3-Methylcatechol	DDI type 26	The risk or severity of adverse effects can be increased when Methionine is combined with 3-Methylcatechol.	0.999433	TRUE	TRUE	Arabica coffee (FOOD00059), Coffee (FOOD00058), Robusta coffee (FOOD00060), Cocoa powder (FOOD00685), Beer (FOOD00268)
DB00134	Methionine	FDB000435	N-Methyltyramine	DDI type 26	The risk or severity of adverse effects can be increased when Methionine is combined with N-Methyltyramine.	0.998962	TRUE	TRUE	Barley (FOOD00088)
DB00134	Methionine	FDB000446	L-Tyrosine	DDI type 78	Methionine may increase the sedative activities of L-Tyrosine.	0.986695	FALSE	FALSE	Milk (Cow) (FOOD00618), Casein (FOOD00659), Other soy product (FOOD00271), Beluga whale (FOOD00300), Red bell pepper (FOOD00880), Buttermilk (FOOD00692), Smelt (FOOD00519), Soy bean (FOOD00085), Spirulina (FOOD00480), Dried milk (FOOD00689)
DB00134	Methionine	FDB000446	L-Tyrosine	DDI type 26	The risk or severity of adverse effects can be increased when L-Tyrosine is combined with Methionine.	0.999957	TRUE	TRUE	Milk (Cow) (FOOD00618), Casein (FOOD00659), Other soy product (FOOD00271), Beluga whale (FOOD00300), Red bell pepper (FOOD00880), Buttermilk (FOOD00692), Smelt (FOOD00519), Soy bean (FOOD00085), Spirulina (FOOD00480), Dried milk (FOOD00689)
DB00134	Methionine	FDB000558	Alliin	DDI type 26	The risk or severity of adverse effects can be increased when Methionine is combined with Alliin.	0.98209	TRUE	TRUE	Soft-necked garlic (FOOD00850)
DB00134	Methionine	FDB000558	Alliin	DDI type 26	The risk or severity of adverse effects can be increased when Alliin is combined with Methionine.	0.997486	TRUE	TRUE	Soft-necked garlic (FOOD00850)
DB00134	Methionine	FDB000567	L-DOPA	DDI type 26	The risk or severity of adverse effects can be increased when L-DOPA is combined with Methionine.	0.999805	TRUE	TRUE	Broad bean (FOOD00197), Swiss chard (FOOD00237), Yellow wax bean (FOOD00882), Spinach (FOOD00178), Green bean (FOOD00883), Red beetroot (FOOD00264), Broccoli (FOOD00034), Dill (FOOD00013), Orange bell pepper (FOOD00879), Yellow zucchini (FOOD00876)
DB00134	Methionine	FDB000710	Choline	DDI type 26	The risk or severity of adverse effects can be increased when Methionine is combined with Choline.	0.996696	TRUE	TRUE	Fenugreek (FOOD00186), Calabash (FOOD00318), Eggs (FOOD00619), Horseradish tree (FOOD00379), Roe (FOOD00698), Chum salmon (FOOD00451), Whitefish (FOOD00503), Sockeye salmon (FOOD00453), Dried milk (FOOD00689), Shrimp (FOOD00533)
DB00134	Methionine	FDB000753	Ethanol	DDI type 26	The risk or severity of adverse effects can be increased when Methionine is combined with Ethanol.	0.998221	TRUE	TRUE	Gin (FOOD00625), Other alcoholic beverage (FOOD00278), Rum (FOOD00629), Vodka (FOOD00622), Spirit (FOOD00276), Whisky (FOOD00623), Liquor (FOOD00616), Madeira wine (FOOD00633), Vanilla (FOOD00195), Sake (FOOD00738)
DB00134	Methionine	FDB000753	Ethanol	DDI type 54	Methionine may increase the central nervous system depressant (CNS depressant) activities of Ethanol.	0.99987	FALSE	FALSE	Gin (FOOD00625), Other alcoholic beverage (FOOD00278), Rum (FOOD00629), Vodka (FOOD00622), Spirit (FOOD00276), Whisky (FOOD00623), Liquor (FOOD00616), Madeira wine (FOOD00633), Vanilla (FOOD00195), Sake (FOOD00738)
DB00134	Methionine	FDB000757	Nonane	DDI type 26	The risk or severity of adverse effects can be increased when Methionine is combined with Nonane.	0.999377	TRUE	TRUE	Lime (FOOD00053), Common oregano (FOOD00124)
DB00134	Methionine	FDB000757	Nonane	DDI type 26	The risk or severity of adverse effects can be increased when Nonane is combined with Methionine.	0.999317	TRUE	TRUE	Lime (FOOD00053), Common oregano (FOOD00124)
DB00134	Methionine	FDB000765	Hexane	DDI type 26	The risk or severity of adverse effects can be increased when Methionine is combined with Hexane.	0.999954	TRUE	TRUE	Kohlrabi (FOOD00033)
DB00134	Methionine	FDB000765	Hexane	DDI type 26	The risk or severity of adverse effects can be increased when Hexane is combined with Methionine.	0.999806	TRUE	TRUE	Kohlrabi (FOOD00033)
DB00134	Methionine	FDB000768	Pentane	DDI type 26	The risk or severity of adverse effects can be increased when Methionine is combined with Pentane.	0.999625	TRUE	TRUE	Kohlrabi (FOOD00033)
DB00134	Methionine	FDB000768	Pentane	DDI type 26	The risk or severity of adverse effects can be increased when Pentane is combined with Methionine.	0.999967	TRUE	TRUE	Kohlrabi (FOOD00033)
DB00134	Methionine	FDB000849	Phloretic acid	DDI type 13	The therapeutic efficacy of Phloretic acid can be decreased when used in combination with Methionine.	0.99137	FALSE	FALSE	Olive (FOOD00121)
DB00134	Methionine	FDB000968	Pentyl pentanoate	DDI type 26	The risk or severity of adverse effects can be increased when Pentyl pentanoate is combined with Methionine.	0.999898	TRUE	TRUE	Peppermint (FOOD00113)
DB00134	Methionine	FDB001014	Nicotinic acid	DDI type 13	The therapeutic efficacy of Methionine can be decreased when used in combination with Nicotinic acid.	0.985706	TRUE	FALSE	Leavening agent (FOOD00661), Yellowfin tuna (FOOD00511), Skipjack tuna (FOOD00476), Meat bouillon (FOOD00657), Hedge mustard (FOOD00475), European anchovy (FOOD00362), Mexican groundcherry (FOOD00491), Peanut (FOOD00016), Mugwort (FOOD00020), Sockeye salmon (FOOD00453)
DB00134	Methionine	FDB001022	Ethyl hexadecanoate	DDI type 26	The risk or severity of adverse effects can be increased when Ethyl hexadecanoate is combined with Methionine.	0.999981	TRUE	TRUE	Coriander (FOOD00061)
DB00134	Methionine	FDB001037	4-Aminobenzoic acid	DDI type 26	The risk or severity of adverse effects can be increased when Methionine is combined with 4-Aminobenzoic acid.	0.958587	TRUE	TRUE	Pineapple (FOOD00012)
DB00134	Methionine	FDB001037	4-Aminobenzoic acid	DDI type 26	The risk or severity of adverse effects can be increased when 4-Aminobenzoic acid is combined with Methionine.	0.998736	TRUE	TRUE	Pineapple (FOOD00012)
DB00134	Methionine	FDB001066	Nonivamide	DDI type 26	The risk or severity of adverse effects can be increased when Nonivamide is combined with Methionine.	0.99986	TRUE	TRUE	Green bell pepper (FOOD00877), Orange bell pepper (FOOD00879), Pepper (FOOD00040), Pepper (C. frutescens) (FOOD00428), Red bell pepper (FOOD00880), Yellow bell pepper (FOOD00878)
DB00134	Methionine	FDB001176	Isodulcitol	DDI type 13	The therapeutic efficacy of Isodulcitol can be decreased when used in combination with Methionine.	0.980609	FALSE	FALSE	Flaxseed (FOOD00101)
DB00134	Methionine	FDB001267	Hexyl acetate	DDI type 26	The risk or severity of adverse effects can be increased when Hexyl acetate is combined with Methionine.	0.999618	TRUE	TRUE	Highbush blueberry (FOOD00191)
DB00134	Methionine	FDB001304	alpha1-Sitosterol	DDI type 26	The risk or severity of adverse effects can be increased when Methionine is combined with alpha1-Sitosterol.	0.999527	TRUE	TRUE	Evening primrose (FOOD00120)
DB00134	Methionine	FDB001361	Ostreasterol	DDI type 26	The risk or severity of adverse effects can be increased when Methionine is combined with Ostreasterol.	0.997482	TRUE	TRUE	Common walnut (FOOD00094)
DB00134	Methionine	FDB001512	1,2-Benzenediol	DDI type 26	The risk or severity of adverse effects can be increased when Methionine is combined with 1,2-Benzenediol.	0.9892	TRUE	TRUE	Arabica coffee (FOOD00059), Coffee (FOOD00058), Robusta coffee (FOOD00060), Cocoa powder (FOOD00685), Beer (FOOD00268)
DB00134	Methionine	FDB001850	Stigmast-7-en-3-ol	DDI type 26	The risk or severity of adverse effects can be increased when Methionine is combined with Stigmast-7-en-3-ol.	0.999737	TRUE	TRUE	Common walnut (FOOD00094)
DB00134	Methionine	FDB001936	Stigmasterol	DDI type 26	The risk or severity of adverse effects can be increased when Methionine is combined with Stigmasterol.	0.992925	TRUE	TRUE	Cherimoya (FOOD00326), Soy bean (FOOD00085), Shortening (FOOD00783), Margarine (FOOD00843), Chocolate (FOOD00687), Flaxseed (FOOD00101), Mung bean (FOOD00200), Sesame (FOOD00170), Turmeric (FOOD00068), Sunflower (FOOD00086)
DB00134	Methionine	FDB002119	6-Propyltridecane	DDI type 26	The risk or severity of adverse effects can be increased when Methionine is combined with 6-Propyltridecane.	0.978226	TRUE	TRUE	Black walnut (FOOD00093)
DB00134	Methionine	FDB002119	6-Propyltridecane	DDI type 26	The risk or severity of adverse effects can be increased when 6-Propyltridecane is combined with Methionine.	0.99996	TRUE	TRUE	Black walnut (FOOD00093)
DB00134	Methionine	FDB002412	Tangeritin	DDI type 26	The risk or severity of adverse effects can be increased when Methionine is combined with Tangeritin.	0.999951	TRUE	TRUE	Sweet orange (FOOD00057)
DB00134	Methionine	FDB002412	Tangeritin	DDI type 26	The risk or severity of adverse effects can be increased when Tangeritin is combined with Methionine.	0.999414	TRUE	TRUE	Sweet orange (FOOD00057)
DB00134	Methionine	FDB002465	Tetramethylscutellarein	DDI type 26	The risk or severity of adverse effects can be increased when Methionine is combined with Tetramethylscutellarein.	0.999058	TRUE	TRUE	Sweet orange (FOOD00057)
DB00134	Methionine	FDB002465	Tetramethylscutellarein	DDI type 26	The risk or severity of adverse effects can be increased when Tetramethylscutellarein is combined with Methionine.	0.999584	TRUE	TRUE	Sweet orange (FOOD00057)
DB00134	Methionine	FDB002590	m-Coumaric acid	DDI type 7	The metabolism of m-Coumaric acid can be increased when combined with Methionine.	0.995409	FALSE	FALSE	Olive (FOOD00121), Corn (FOOD00205), Beer (FOOD00268)
DB00134	Methionine	FDB002880	Alliospiroside C	DDI type 26	The risk or severity of adverse effects can be increased when Methionine is combined with Alliospiroside C.	0.954061	TRUE	TRUE	Garden onion (FOOD00006)
DB00134	Methionine	FDB002951	Elaidic acid	DDI type 26	The risk or severity of adverse effects can be increased when Methionine is combined with Elaidic acid.	0.998059	TRUE	TRUE	Pomegranate (FOOD00151), Milk (Cow) (FOOD00618)
DB00134	Methionine	FDB002951	Elaidic acid	DDI type 26	The risk or severity of adverse effects can be increased when Elaidic acid is combined with Methionine.	0.999884	TRUE	TRUE	Pomegranate (FOOD00151), Milk (Cow) (FOOD00618)
DB00134	Methionine	FDB002952	Vaccenic acid	DDI type 26	The risk or severity of adverse effects can be increased when Methionine is combined with Vaccenic acid.	0.998059	TRUE	TRUE	Other animal fat (FOOD00682), Margarine (FOOD00843), Scombridae (Bonito, Mackerel, Tuna) (FOOD00586), Cattle (Beef, Veal) (FOOD00495), Domestic pig (FOOD00536), Other dish (FOOD00836), Sturgeon (FOOD00570), Clupeinae (Herring, Sardine, Sprat) (FOOD00520), Rainbow trout (FOOD00444), Milk (Cow) (FOOD00618)
DB00134	Methionine	FDB002952	Vaccenic acid	DDI type 26	The risk or severity of adverse effects can be increased when Vaccenic acid is combined with Methionine.	0.999884	TRUE	TRUE	Other animal fat (FOOD00682), Margarine (FOOD00843), Scombridae (Bonito, Mackerel, Tuna) (FOOD00586), Cattle (Beef, Veal) (FOOD00495), Domestic pig (FOOD00536), Other dish (FOOD00836), Sturgeon (FOOD00570), Clupeinae (Herring, Sardine, Sprat) (FOOD00520), Rainbow trout (FOOD00444), Milk (Cow) (FOOD00618)
DB00134	Methionine	FDB002998	Adipostatin A	DDI type 26	The risk or severity of adverse effects can be increased when Adipostatin A is combined with Methionine.	0.99789	TRUE	TRUE	Rye (FOOD00169), Hard wheat (FOOD00242), Common wheat (FOOD00187), Barley (FOOD00088)
DB00134	Methionine	FDB003051	Cetyl alcohol	DDI type 26	The risk or severity of adverse effects can be increased when Methionine is combined with Cetyl alcohol.	0.999782	TRUE	TRUE	Kohlrabi (FOOD00033)
DB00134	Methionine	FDB003051	Cetyl alcohol	DDI type 26	The risk or severity of adverse effects can be increased when Cetyl alcohol is combined with Methionine.	0.999955	TRUE	TRUE	Kohlrabi (FOOD00033)
DB00134	Methionine	FDB003107	Coronaric acid	DDI type 26	The risk or severity of adverse effects can be increased when Methionine is combined with Coronaric acid.	0.99398	TRUE	TRUE	Rice (FOOD00125)
DB00134	Methionine	FDB003107	Coronaric acid	DDI type 26	The risk or severity of adverse effects can be increased when Coronaric acid is combined with Methionine.	0.99998	TRUE	TRUE	Rice (FOOD00125)
DB00134	Methionine	FDB003175	1-Pentanesulfenothioic acid	DDI type 26	The risk or severity of adverse effects can be increased when Methionine is combined with 1-Pentanesulfenothioic acid.	0.997276	TRUE	TRUE	Chives (FOOD00009)
DB00134	Methionine	FDB003175	1-Pentanesulfenothioic acid	DDI type 26	The risk or severity of adverse effects can be increased when 1-Pentanesulfenothioic acid is combined with Methionine.	0.999961	TRUE	TRUE	Chives (FOOD00009)
DB00134	Methionine	FDB003255	2-Ethyl-1-hexanol	DDI type 26	The risk or severity of adverse effects can be increased when Methionine is combined with 2-Ethyl-1-hexanol.	0.999915	TRUE	TRUE	Corn (FOOD00205), Peppermint (FOOD00113)
DB00134	Methionine	FDB003303	Nonanal	DDI type 26	The risk or severity of adverse effects can be increased when Methionine is combined with Nonanal.	0.992741	TRUE	TRUE	Corn (FOOD00205), Black tea (FOOD00907), Green tea (FOOD00908), Herbal tea (FOOD00989), Red tea (FOOD00925), Tea (FOOD00038), Ginger (FOOD00206), Lime (FOOD00053), Lemon (FOOD00054), Sweet orange (FOOD00057)
DB00134	Methionine	FDB003306	Nonanoic acid	DDI type 7	The metabolism of Nonanoic acid can be increased when combined with Methionine.	0.983339	FALSE	FALSE	Coconut (FOOD00336), Butter (FOOD00648), Oil palm (FOOD00591), Cheese (FOOD00617), Cream (FOOD00650), Dried milk (FOOD00689), Whey (FOOD00658), Milk (Other mammals) (FOOD00690), Other fermented milk (FOOD00693), Ymer (FOOD00638)
DB00134	Methionine	FDB003306	Nonanoic acid	DDI type 26	The risk or severity of adverse effects can be increased when Nonanoic acid is combined with Methionine.	0.99963	TRUE	TRUE	Coconut (FOOD00336), Butter (FOOD00648), Oil palm (FOOD00591), Cheese (FOOD00617), Cream (FOOD00650), Dried milk (FOOD00689), Whey (FOOD00658), Milk (Other mammals) (FOOD00690), Other fermented milk (FOOD00693), Ymer (FOOD00638)
DB00134	Methionine	FDB003308	2-Nonanone	DDI type 26	The risk or severity of adverse effects can be increased when Methionine is combined with 2-Nonanone.	0.994218	TRUE	TRUE	Corn (FOOD00205), Ginger (FOOD00206), Cloves (FOOD00179)
DB00134	Methionine	FDB003336	Octanoic acid	DDI type 26	The risk or severity of adverse effects can be increased when Octanoic acid is combined with Methionine.	0.999833	TRUE	TRUE	Babassu palm (FOOD00773), Coconut (FOOD00336), Oil palm (FOOD00591), Butter (FOOD00648), Butterfat (FOOD00760), Coffee mocha (FOOD00743), Common sage (FOOD00165), Cream substitute (FOOD00713), Cheese (FOOD00617), Cream (FOOD00650)
DB00134	Methionine	FDB003337	Methyl caprylate	DDI type 26	The risk or severity of adverse effects can be increased when Methyl caprylate is combined with Methionine.	0.99784	TRUE	TRUE	Pineapple (FOOD00012)
DB00134	Methionine	FDB003339	Octanal	DDI type 26	The risk or severity of adverse effects can be increased when Methionine is combined with Octanal.	0.990794	TRUE	TRUE	Lime (FOOD00053), Caraway (FOOD00043), Mandarin orange (Clementine, Tangerine) (FOOD00056), Carrot (FOOD00245), Wild carrot (FOOD00072)
DB00134	Methionine	FDB003342	2-Octanol	DDI type 26	The risk or severity of adverse effects can be increased when Methionine is combined with 2-Octanol.	0.999922	TRUE	TRUE	Corn (FOOD00205)
DB00134	Methionine	FDB003342	2-Octanol	DDI type 26	The risk or severity of adverse effects can be increased when 2-Octanol is combined with Methionine.	0.941196	TRUE	TRUE	Corn (FOOD00205)
DB00134	Methionine	FDB003343	3-Octanol	DDI type 26	The risk or severity of adverse effects can be increased when Methionine is combined with 3-Octanol.	0.999916	TRUE	TRUE	Cornmint (FOOD00111), Spearmint (FOOD00112), Orange mint (FOOD00110), Common oregano (FOOD00124), Peppermint (FOOD00113), Rosemary (FOOD00159), Lemon balm (FOOD00108), Hyssop (FOOD00089)
DB00134	Methionine	FDB003598	17alpha-ethynylestradiol	DDI type 7	The metabolism of 17alpha-ethynylestradiol can be increased when combined with Methionine.	0.99962	FALSE	FALSE	Cloves (FOOD00179), Cardamom (FOOD00074), Ginkgo nuts (FOOD00367), Nutmeg (FOOD00118), Star anise (FOOD00090), Ginger (FOOD00206), Ceylon cinnamon (FOOD00051), Cumin (FOOD00067), Pot marjoram (FOOD00123), Anise (FOOD00137)
DB00134	Methionine	FDB003668	Prostaglandin A-1	DDI type 26	The risk or severity of adverse effects can be increased when Methionine is combined with Prostaglandin A-1.	0.997301	TRUE	TRUE	Garden onion (FOOD00006)
DB00134	Methionine	FDB003668	Prostaglandin A-1	DDI type 26	The risk or severity of adverse effects can be increased when Prostaglandin A-1 is combined with Methionine.	0.999901	TRUE	TRUE	Garden onion (FOOD00006)
DB00134	Methionine	FDB003685	S-Allylmercaptocysteine	DDI type 26	The risk or severity of adverse effects can be increased when S-Allylmercaptocysteine is combined with Methionine.	0.992433	TRUE	TRUE	Soft-necked garlic (FOOD00850)
DB00134	Methionine	FDB003693	Salicylates	DDI type 7	The metabolism of Salicylates can be increased when combined with Methionine.	0.969201	FALSE	FALSE	Common thyme (FOOD00183), Turmeric (FOOD00068), Peppermint (FOOD00113), Rosemary (FOOD00159), Mandarin orange (Clementine, Tangerine) (FOOD00056), Colorado pinyon (FOOD00433), Common walnut (FOOD00094), Pomegranate (FOOD00151)
DB00134	Methionine	FDB003771	Gadoleic acid	DDI type 26	The risk or severity of adverse effects can be increased when Methionine is combined with Gadoleic acid.	0.998495	TRUE	TRUE	Fish oil (FOOD00990), Other fish product (FOOD00665), Lumpsucker (FOOD00585), White mustard (FOOD00413), Greenland halibut/turbot (FOOD00370), Scombridae (Bonito, Mackerel, Tuna) (FOOD00586), Gadus (Common cod) (FOOD00515), Anguilliformes (FOOD00577), Rape (FOOD00029), Colorado pinyon (FOOD00433)
DB00134	Methionine	FDB003771	Gadoleic acid	DDI type 26	The risk or severity of adverse effects can be increased when Gadoleic acid is combined with Methionine.	0.999895	TRUE	TRUE	Fish oil (FOOD00990), Other fish product (FOOD00665), Lumpsucker (FOOD00585), White mustard (FOOD00413), Greenland halibut/turbot (FOOD00370), Scombridae (Bonito, Mackerel, Tuna) (FOOD00586), Gadus (Common cod) (FOOD00515), Anguilliformes (FOOD00577), Rape (FOOD00029), Colorado pinyon (FOOD00433)
DB00134	Methionine	FDB003797	Esters	DDI type 26	The risk or severity of adverse effects can be increased when Methionine is combined with Esters.	0.99965	TRUE	TRUE	Pineapple (FOOD00012)
DB00134	Methionine	FDB003938	Flavonoids	DDI type 26	The risk or severity of adverse effects can be increased when Flavonoids is combined with Methionine.	0.999553	TRUE	TRUE	Common grape (FOOD00204), Passion fruit (FOOD00128), Fig (FOOD00081), Blackcurrant (FOOD00155), Rose hip (FOOD00446), Turmeric (FOOD00068)
DB00134	Methionine	FDB003965	N-Pentyl benzene	DDI type 26	The risk or severity of adverse effects can be increased when Methionine is combined with N-Pentyl benzene.	0.999797	TRUE	TRUE	Wild celery (FOOD00015)
DB00134	Methionine	FDB003965	N-Pentyl benzene	DDI type 26	The risk or severity of adverse effects can be increased when N-Pentyl benzene is combined with Methionine.	0.999807	TRUE	TRUE	Wild celery (FOOD00015)
DB00134	Methionine	FDB004036	Hexadecenoic acid	DDI type 26	The risk or severity of adverse effects can be increased when Methionine is combined with Hexadecenoic acid.	0.974034	TRUE	TRUE	Muskmelon (FOOD00064), Sesame (FOOD00170), Parsley (FOOD00131)
DB00134	Methionine	FDB004036	Hexadecenoic acid	DDI type 26	The risk or severity of adverse effects can be increased when Hexadecenoic acid is combined with Methionine.	0.957171	TRUE	TRUE	Muskmelon (FOOD00064), Sesame (FOOD00170), Parsley (FOOD00131)
DB00134	Methionine	FDB004090	Atropine	DDI type 26	The risk or severity of adverse effects can be increased when Methionine is combined with Atropine.	0.946112	TRUE	TRUE	Burdock (FOOD00017)
DB00134	Methionine	FDB004090	Atropine	DDI type 54	Methionine may increase the central nervous system depressant (CNS depressant) activities of Atropine.	0.997501	FALSE	FALSE	Burdock (FOOD00017)
DB00134	Methionine	FDB004105	1-Heptadecene	DDI type 26	The risk or severity of adverse effects can be increased when Methionine is combined with 1-Heptadecene.	0.99938	TRUE	TRUE	Safflower (FOOD00042)
DB00134	Methionine	FDB004105	1-Heptadecene	DDI type 26	The risk or severity of adverse effects can be increased when 1-Heptadecene is combined with Methionine.	0.999964	TRUE	TRUE	Safflower (FOOD00042)
DB00134	Methionine	FDB004212	delta-5-Avenasterol	DDI type 26	The risk or severity of adverse effects can be increased when Methionine is combined with delta-5-Avenasterol.	0.994712	TRUE	TRUE	Common walnut (FOOD00094)
DB00134	Methionine	FDB004234	Melatonin	DDI type 26	The risk or severity of adverse effects can be increased when Methionine is combined with Melatonin.	0.99997	TRUE	TRUE	Corn (FOOD00205)
DB00134	Methionine	FDB004234	Melatonin	DDI type 26	The risk or severity of adverse effects can be increased when Melatonin is combined with Methionine.	0.999969	TRUE	TRUE	Corn (FOOD00205)
DB00134	Methionine	FDB004307	2-Phenethyl isothiocyanate	DDI type 26	The risk or severity of adverse effects can be increased when Methionine is combined with 2-Phenethyl isothiocyanate.	0.997866	TRUE	TRUE	Kohlrabi (FOOD00033)
DB00134	Methionine	FDB004307	2-Phenethyl isothiocyanate	DDI type 26	The risk or severity of adverse effects can be increased when 2-Phenethyl isothiocyanate is combined with Methionine.	0.999819	TRUE	TRUE	Kohlrabi (FOOD00033)
DB00134	Methionine	FDB004514	2-Hexanol	DDI type 26	The risk or severity of adverse effects can be increased when Methionine is combined with 2-Hexanol.	0.999952	TRUE	TRUE	Safflower (FOOD00042)
DB00134	Methionine	FDB004514	2-Hexanol	DDI type 26	The risk or severity of adverse effects can be increased when 2-Hexanol is combined with Methionine.	0.999048	TRUE	TRUE	Safflower (FOOD00042)
DB00134	Methionine	FDB004676	Heptadecanoic acid	DDI type 26	The risk or severity of adverse effects can be increased when Methionine is combined with Heptadecanoic acid.	0.998742	TRUE	TRUE	Cinnamon (FOOD00572), Cattle (Beef, Veal) (FOOD00495), Sturgeon (FOOD00570), Crab (FOOD00573), Sausage (FOOD00652), Rabbit (FOOD00528), Cashew nut (FOOD00011), Oyster mushroom (FOOD00553), Clawed lobster (FOOD00584), Atlantic halibut (FOOD00516)
DB00134	Methionine	FDB004676	Heptadecanoic acid	DDI type 26	The risk or severity of adverse effects can be increased when Heptadecanoic acid is combined with Methionine.	0.999987	TRUE	TRUE	Cinnamon (FOOD00572), Cattle (Beef, Veal) (FOOD00495), Sturgeon (FOOD00570), Crab (FOOD00573), Sausage (FOOD00652), Rabbit (FOOD00528), Cashew nut (FOOD00011), Oyster mushroom (FOOD00553), Clawed lobster (FOOD00584), Atlantic halibut (FOOD00516)
DB00134	Methionine	FDB004683	Obtusifoliol	DDI type 26	The risk or severity of adverse effects can be increased when Methionine is combined with Obtusifoliol.	0.999169	TRUE	TRUE	Evening primrose (FOOD00120)
DB00134	Methionine	FDB004727	N-Eicosane	DDI type 26	The risk or severity of adverse effects can be increased when N-Eicosane is combined with Methionine.	0.996671	TRUE	TRUE	Lemon balm (FOOD00108)
DB00134	Methionine	FDB004728	N-Heneicosane	DDI type 26	The risk or severity of adverse effects can be increased when N-Heneicosane is combined with Methionine.	0.983939	TRUE	TRUE	Black elderberry (FOOD00166), Common oregano (FOOD00124), Lemon balm (FOOD00108)
DB00134	Methionine	FDB004731	N-Tetradecane	DDI type 26	The risk or severity of adverse effects can be increased when Methionine is combined with N-Tetradecane.	0.999062	TRUE	TRUE	Black walnut (FOOD00093)
DB00134	Methionine	FDB004731	N-Tetradecane	DDI type 26	The risk or severity of adverse effects can be increased when N-Tetradecane is combined with Methionine.	0.999987	TRUE	TRUE	Black walnut (FOOD00093)
DB00134	Methionine	FDB004741	(Z)-3-Hexenylbenzoate	DDI type 26	The risk or severity of adverse effects can be increased when (Z)-3-Hexenylbenzoate is combined with Methionine.	0.998777	TRUE	TRUE	Safflower (FOOD00042)
DB00134	Methionine	FDB004763	Ethyl benzene	DDI type 26	The risk or severity of adverse effects can be increased when Methionine is combined with Ethyl benzene.	0.974535	TRUE	TRUE	Black walnut (FOOD00093), Safflower (FOOD00042)
DB00134	Methionine	FDB004763	Ethyl benzene	DDI type 26	The risk or severity of adverse effects can be increased when Ethyl benzene is combined with Methionine.	0.999943	TRUE	TRUE	Black walnut (FOOD00093), Safflower (FOOD00042)
DB00134	Methionine	FDB005197	Ethyl pentadecanoate	DDI type 26	The risk or severity of adverse effects can be increased when Methionine is combined with Ethyl pentadecanoate.	0.979681	TRUE	TRUE	Coriander (FOOD00061)
DB00134	Methionine	FDB005197	Ethyl pentadecanoate	DDI type 26	The risk or severity of adverse effects can be increased when Ethyl pentadecanoate is combined with Methionine.	0.999989	TRUE	TRUE	Coriander (FOOD00061)
DB00134	Methionine	FDB005482	Glycosides	DDI type 17	Glycosides may decrease the cardiotoxic activities of Methionine.	0.950611	TRUE	FALSE	Apricot (FOOD00144), Fig (FOOD00081)
DB00134	Methionine	FDB005802	Calamene	DDI type 26	The risk or severity of adverse effects can be increased when Methionine is combined with Calamene.	0.999946	TRUE	TRUE	Star anise (FOOD00090), Common sage (FOOD00165)
DB00134	Methionine	FDB005802	Calamene	DDI type 26	The risk or severity of adverse effects can be increased when Calamene is combined with Methionine.	0.998871	TRUE	TRUE	Star anise (FOOD00090), Common sage (FOOD00165)
DB00134	Methionine	FDB005814	1,2,3-Trimethylbenzene	DDI type 26	The risk or severity of adverse effects can be increased when Methionine is combined with 1,2,3-Trimethylbenzene.	0.999871	TRUE	TRUE	Black walnut (FOOD00093)
DB00134	Methionine	FDB005814	1,2,3-Trimethylbenzene	DDI type 26	The risk or severity of adverse effects can be increased when 1,2,3-Trimethylbenzene is combined with Methionine.	0.999922	TRUE	TRUE	Black walnut (FOOD00093)
DB00134	Methionine	FDB005827	3-Methyltridecane	DDI type 26	The risk or severity of adverse effects can be increased when Methionine is combined with 3-Methyltridecane.	0.999021	TRUE	TRUE	Black walnut (FOOD00093)
DB00134	Methionine	FDB005827	3-Methyltridecane	DDI type 26	The risk or severity of adverse effects can be increased when 3-Methyltridecane is combined with Methionine.	0.999985	TRUE	TRUE	Black walnut (FOOD00093)
DB00134	Methionine	FDB006154	5-Methylheptan-3-one	DDI type 26	The risk or severity of adverse effects can be increased when Methionine is combined with 5-Methylheptan-3-one.	0.99978	TRUE	TRUE	Peppermint (FOOD00113)
DB00134	Methionine	FDB006154	5-Methylheptan-3-one	DDI type 26	The risk or severity of adverse effects can be increased when 5-Methylheptan-3-one is combined with Methionine.	0.997665	TRUE	TRUE	Peppermint (FOOD00113)
DB00134	Methionine	FDB006365	alpha,alpha-Dimethylbenzyl alcohol	DDI type 26	The risk or severity of adverse effects can be increased when Methionine is combined with alpha,alpha-Dimethylbenzyl alcohol.	0.998015	TRUE	TRUE	Pot marjoram (FOOD00123)
DB00134	Methionine	FDB006365	alpha,alpha-Dimethylbenzyl alcohol	DDI type 26	The risk or severity of adverse effects can be increased when alpha,alpha-Dimethylbenzyl alcohol is combined with Methionine.	0.973643	TRUE	TRUE	Pot marjoram (FOOD00123)
DB00134	Methionine	FDB006381	(11R,12S,13S)-Epoxy-hydroxyoctadeca-cis-9-cis-15-dien-1-oic acid	DDI type 26	The risk or severity of adverse effects can be increased when Methionine is combined with (11R,12S,13S)-Epoxy-hydroxyoctadeca-cis-9-cis-15-dien-1-oic acid.	0.991618	TRUE	TRUE	Rice (FOOD00125)
DB00134	Methionine	FDB006381	(11R,12S,13S)-Epoxy-hydroxyoctadeca-cis-9-cis-15-dien-1-oic acid	DDI type 26	The risk or severity of adverse effects can be increased when (11R,12S,13S)-Epoxy-hydroxyoctadeca-cis-9-cis-15-dien-1-oic acid is combined with Methionine.	0.997186	TRUE	TRUE	Rice (FOOD00125)
DB00134	Methionine	FDB006382	(11S,12S,13S)-Epoxy-hydroxyoctadeca-cis-9-cis-15-dien-1-oic acid	DDI type 26	The risk or severity of adverse effects can be increased when Methionine is combined with (11S,12S,13S)-Epoxy-hydroxyoctadeca-cis-9-cis-15-dien-1-oic acid.	0.991618	TRUE	TRUE	Rice (FOOD00125)
DB00134	Methionine	FDB006382	(11S,12S,13S)-Epoxy-hydroxyoctadeca-cis-9-cis-15-dien-1-oic acid	DDI type 26	The risk or severity of adverse effects can be increased when (11S,12S,13S)-Epoxy-hydroxyoctadeca-cis-9-cis-15-dien-1-oic acid is combined with Methionine.	0.997186	TRUE	TRUE	Rice (FOOD00125)
DB00134	Methionine	FDB006916	alpha-Fenchyl acetate	DDI type 26	The risk or severity of adverse effects can be increased when Methionine is combined with alpha-Fenchyl acetate.	0.999965	TRUE	TRUE	Rosemary (FOOD00159)
DB00134	Methionine	FDB006916	alpha-Fenchyl acetate	DDI type 26	The risk or severity of adverse effects can be increased when alpha-Fenchyl acetate is combined with Methionine.	0.999115	TRUE	TRUE	Rosemary (FOOD00159)
DB00134	Methionine	FDB006925	cis-Myrtenol	DDI type 26	The risk or severity of adverse effects can be increased when Methionine is combined with cis-Myrtenol.	0.999807	TRUE	TRUE	Rosemary (FOOD00159)
DB00134	Methionine	FDB006925	cis-Myrtenol	DDI type 26	The risk or severity of adverse effects can be increased when cis-Myrtenol is combined with Methionine.	0.999812	TRUE	TRUE	Rosemary (FOOD00159)
DB00134	Methionine	FDB007498	Diethylstilbesterol	DDI type 7	The metabolism of Diethylstilbesterol can be increased when combined with Methionine.	0.996717	FALSE	FALSE	Gram bean (FOOD00199)
DB00134	Methionine	FDB007498	Diethylstilbesterol	DDI type 26	The risk or severity of adverse effects can be increased when Diethylstilbesterol is combined with Methionine.	0.999652	TRUE	TRUE	Gram bean (FOOD00199)
DB00134	Methionine	FDB007640	6,10,14-Trimethylpentadecan-2-one	DDI type 26	The risk or severity of adverse effects can be increased when 6,10,14-Trimethylpentadecan-2-one is combined with Methionine.	0.999882	TRUE	TRUE	Common oregano (FOOD00124)
DB00134	Methionine	FDB007854	Alliospiroside A	DDI type 26	The risk or severity of adverse effects can be increased when Methionine is combined with Alliospiroside A.	0.970898	TRUE	TRUE	Garden onion (FOOD00006)
DB00134	Methionine	FDB008048	Heptanal	DDI type 26	The risk or severity of adverse effects can be increased when Methionine is combined with Heptanal.	0.964279	TRUE	TRUE	Corn (FOOD00205), Black tea (FOOD00907), Green tea (FOOD00908), Herbal tea (FOOD00989), Red tea (FOOD00925), Tea (FOOD00038), Milk (Cow) (FOOD00618), Lemon (FOOD00054), Sweet orange (FOOD00057), Carrot (FOOD00245)
DB00134	Methionine	FDB008048	Heptanal	DDI type 26	The risk or severity of adverse effects can be increased when Heptanal is combined with Methionine.	0.999733	TRUE	TRUE	Corn (FOOD00205), Black tea (FOOD00907), Green tea (FOOD00908), Herbal tea (FOOD00989), Red tea (FOOD00925), Tea (FOOD00038), Milk (Cow) (FOOD00618), Lemon (FOOD00054), Sweet orange (FOOD00057), Carrot (FOOD00245)
DB00134	Methionine	FDB008051	Heptanoic acid	DDI type 26	The risk or severity of adverse effects can be increased when Heptanoic acid is combined with Methionine.	0.999878	TRUE	TRUE	Butter (FOOD00648), Tofu (FOOD00696), Cinnamon (FOOD00572), Smelt (FOOD00519), Chinese cinnamon (FOOD00050), Bearded seal (FOOD00466), Cattle (Beef, Veal) (FOOD00495), Macadamia nut (FOOD00525), Margarine-like spread (FOOD00844), Shortening (FOOD00783)
DB00134	Methionine	FDB008053	1-Heptanol	DDI type 26	The risk or severity of adverse effects can be increased when Methionine is combined with 1-Heptanol.	0.999944	TRUE	TRUE	Corn (FOOD00205), Black walnut (FOOD00093), Mandarin orange (Clementine, Tangerine) (FOOD00056)
DB00134	Methionine	FDB008053	1-Heptanol	DDI type 26	The risk or severity of adverse effects can be increased when 1-Heptanol is combined with Methionine.	0.996814	TRUE	TRUE	Corn (FOOD00205), Black walnut (FOOD00093), Mandarin orange (Clementine, Tangerine) (FOOD00056)
DB00134	Methionine	FDB008055	2-Heptanone	DDI type 26	The risk or severity of adverse effects can be increased when Methionine is combined with 2-Heptanone.	0.991675	TRUE	TRUE	Corn (FOOD00205), Milk (Cow) (FOOD00618), Peppermint (FOOD00113)
DB00134	Methionine	FDB008055	2-Heptanone	DDI type 26	The risk or severity of adverse effects can be increased when 2-Heptanone is combined with Methionine.	0.996163	TRUE	TRUE	Corn (FOOD00205), Milk (Cow) (FOOD00618), Peppermint (FOOD00113)
DB00134	Methionine	FDB008056	3-Heptanol	DDI type 26	The risk or severity of adverse effects can be increased when Methionine is combined with 3-Heptanol.	0.999951	TRUE	TRUE	Peppermint (FOOD00113)
DB00134	Methionine	FDB008056	3-Heptanol	DDI type 26	The risk or severity of adverse effects can be increased when 3-Heptanol is combined with Methionine.	0.971509	TRUE	TRUE	Peppermint (FOOD00113)
DB00134	Methionine	FDB008068	Hexanal	DDI type 26	The risk or severity of adverse effects can be increased when Hexanal is combined with Methionine.	0.999962	TRUE	TRUE	Corn (FOOD00205), Black walnut (FOOD00093), Black tea (FOOD00907), Green tea (FOOD00908), Herbal tea (FOOD00989), Red tea (FOOD00925), Tea (FOOD00038), Milk (Cow) (FOOD00618), Orange mint (FOOD00110), Common oregano (FOOD00124)
DB00134	Methionine	FDB008072	1-Hexanol	DDI type 26	The risk or severity of adverse effects can be increased when Methionine is combined with 1-Hexanol.	0.99988	TRUE	TRUE	Corn (FOOD00205), Black walnut (FOOD00093), Lovage (FOOD00100), Hyssop (FOOD00089), Milk (Cow) (FOOD00618), Safflower (FOOD00042), Soft-necked garlic (FOOD00850), Parsley (FOOD00131), Sweet orange (FOOD00057), Bilberry (FOOD00193)
DB00134	Methionine	FDB008072	1-Hexanol	DDI type 26	The risk or severity of adverse effects can be increased when 1-Hexanol is combined with Methionine.	0.99943	TRUE	TRUE	Corn (FOOD00205), Black walnut (FOOD00093), Lovage (FOOD00100), Hyssop (FOOD00089), Milk (Cow) (FOOD00618), Safflower (FOOD00042), Soft-necked garlic (FOOD00850), Parsley (FOOD00131), Sweet orange (FOOD00057), Bilberry (FOOD00193)
DB00134	Methionine	FDB008073	3-Hexanol	DDI type 26	The risk or severity of adverse effects can be increased when Methionine is combined with 3-Hexanol.	0.999954	TRUE	TRUE	Safflower (FOOD00042)
DB00134	Methionine	FDB008073	3-Hexanol	DDI type 26	The risk or severity of adverse effects can be increased when 3-Hexanol is combined with Methionine.	0.998992	TRUE	TRUE	Safflower (FOOD00042)
DB00134	Methionine	FDB008230	1-Pentanol	DDI type 26	The risk or severity of adverse effects can be increased when Methionine is combined with 1-Pentanol.	0.999735	TRUE	TRUE	Black walnut (FOOD00093), Common thyme (FOOD00183), Black tea (FOOD00907), Green tea (FOOD00908), Herbal tea (FOOD00989), Red tea (FOOD00925), Tea (FOOD00038), Milk (Cow) (FOOD00618), Safflower (FOOD00042), Bilberry (FOOD00193)
DB00134	Methionine	FDB008230	1-Pentanol	DDI type 26	The risk or severity of adverse effects can be increased when 1-Pentanol is combined with Methionine.	0.999935	TRUE	TRUE	Black walnut (FOOD00093), Common thyme (FOOD00183), Black tea (FOOD00907), Green tea (FOOD00908), Herbal tea (FOOD00989), Red tea (FOOD00925), Tea (FOOD00038), Milk (Cow) (FOOD00618), Safflower (FOOD00042), Bilberry (FOOD00193)
DB00134	Methionine	FDB008492	Cuminyl alcohol	DDI type 26	The risk or severity of adverse effects can be increased when Methionine is combined with Cuminyl alcohol.	0.998144	TRUE	TRUE	Cumin (FOOD00067), Peppermint (FOOD00113)
DB00134	Methionine	FDB008492	Cuminyl alcohol	DDI type 26	The risk or severity of adverse effects can be increased when Cuminyl alcohol is combined with Methionine.	0.99653	TRUE	TRUE	Cumin (FOOD00067), Peppermint (FOOD00113)
DB00134	Methionine	FDB008739	Benzoic acid	DDI type 7	The metabolism of Benzoic acid can be increased when combined with Methionine.	0.982912	FALSE	FALSE	American cranberry (FOOD00192), Italian sweet red pepper (FOOD00881), Garden onion (FOOD00006), Dill (FOOD00013), Broccoli (FOOD00034), Parsnip (FOOD00129), Green zucchini (FOOD00875), Cocoa powder (FOOD00685), Milk (Cow) (FOOD00618), Cucumber (FOOD00065)
DB00134	Methionine	FDB008739	Benzoic acid	DDI type 26	The risk or severity of adverse effects can be increased when Benzoic acid is combined with Methionine.	0.958515	TRUE	TRUE	American cranberry (FOOD00192), Italian sweet red pepper (FOOD00881), Garden onion (FOOD00006), Dill (FOOD00013), Broccoli (FOOD00034), Parsnip (FOOD00129), Green zucchini (FOOD00875), Cocoa powder (FOOD00685), Milk (Cow) (FOOD00618), Cucumber (FOOD00065)
DB00134	Methionine	FDB008754	Hydroxytyrosol	DDI type 26	The risk or severity of adverse effects can be increased when Methionine is combined with Hydroxytyrosol.	0.999687	TRUE	TRUE	Olive (FOOD00121), Grape wine (FOOD00612)
DB00134	Methionine	FDB008789	4-Methylphenol	DDI type 26	The risk or severity of adverse effects can be increased when Methionine is combined with 4-Methylphenol.	0.999737	TRUE	TRUE	Peppermint (FOOD00113), Bilberry (FOOD00193)
DB00134	Methionine	FDB008857	3-(3,4-Dihydroxyphenyl)propanoic acid	DDI type 13	The therapeutic efficacy of 3-(3,4-Dihydroxyphenyl)propanoic acid can be decreased when used in combination with Methionine.	0.991318	FALSE	FALSE	Olive (FOOD00121)
DB00134	Methionine	FDB008861	4-Methyl-1,2-benzenediol	DDI type 26	The risk or severity of adverse effects can be increased when Methionine is combined with 4-Methyl-1,2-benzenediol.	0.999303	TRUE	TRUE	Arabica coffee (FOOD00059), Coffee (FOOD00058), Robusta coffee (FOOD00060), Cocoa powder (FOOD00685), Beer (FOOD00268)
DB00134	Methionine	FDB008861	4-Methyl-1,2-benzenediol	DDI type 26	The risk or severity of adverse effects can be increased when 4-Methyl-1,2-benzenediol is combined with Methionine.	0.944408	TRUE	TRUE	Arabica coffee (FOOD00059), Coffee (FOOD00058), Robusta coffee (FOOD00060), Cocoa powder (FOOD00685), Beer (FOOD00268)
DB00134	Methionine	FDB009029	Bornyl acetate	DDI type 26	The risk or severity of adverse effects can be increased when Methionine is combined with Bornyl acetate.	0.999966	TRUE	TRUE	Rosemary (FOOD00159), Common sage (FOOD00165), Sweet basil (FOOD00119), Common thyme (FOOD00183), Spearmint (FOOD00112), Ginger (FOOD00206), Cumin (FOOD00067), Carrot (FOOD00245), Wild carrot (FOOD00072), Ceylon cinnamon (FOOD00051)
DB00134	Methionine	FDB009029	Bornyl acetate	DDI type 26	The risk or severity of adverse effects can be increased when Bornyl acetate is combined with Methionine.	0.999111	TRUE	TRUE	Rosemary (FOOD00159), Common sage (FOOD00165), Sweet basil (FOOD00119), Common thyme (FOOD00183), Spearmint (FOOD00112), Ginger (FOOD00206), Cumin (FOOD00067), Carrot (FOOD00245), Wild carrot (FOOD00072), Ceylon cinnamon (FOOD00051)
DB00134	Methionine	FDB009636	Isoborneol	DDI type 26	The risk or severity of adverse effects can be increased when Methionine is combined with Isoborneol.	0.999877	TRUE	TRUE	Common sage (FOOD00165), Turmeric (FOOD00068), Rosemary (FOOD00159), Common oregano (FOOD00124)
DB00134	Methionine	FDB009636	Isoborneol	DDI type 26	The risk or severity of adverse effects can be increased when Isoborneol is combined with Methionine.	0.999815	TRUE	TRUE	Common sage (FOOD00165), Turmeric (FOOD00068), Rosemary (FOOD00159), Common oregano (FOOD00124)
DB00134	Methionine	FDB010039	Pentylamine	DDI type 26	The risk or severity of adverse effects can be increased when Methionine is combined with Pentylamine.	0.999111	TRUE	TRUE	Green bell pepper (FOOD00877), Orange bell pepper (FOOD00879), Pepper (FOOD00040), Red bell pepper (FOOD00880), Yellow bell pepper (FOOD00878), Cabbage (FOOD00851), White cabbage (FOOD00887), Apple (FOOD00105)
DB00134	Methionine	FDB010039	Pentylamine	DDI type 26	The risk or severity of adverse effects can be increased when Pentylamine is combined with Methionine.	0.999947	TRUE	TRUE	Green bell pepper (FOOD00877), Orange bell pepper (FOOD00879), Pepper (FOOD00040), Red bell pepper (FOOD00880), Yellow bell pepper (FOOD00878), Cabbage (FOOD00851), White cabbage (FOOD00887), Apple (FOOD00105)
DB00134	Methionine	FDB010420	Fenchyl acetate	DDI type 26	The risk or severity of adverse effects can be increased when Methionine is combined with Fenchyl acetate.	0.999965	TRUE	TRUE	Sweet basil (FOOD00119)
DB00134	Methionine	FDB010420	Fenchyl acetate	DDI type 26	The risk or severity of adverse effects can be increased when Fenchyl acetate is combined with Methionine.	0.999115	TRUE	TRUE	Sweet basil (FOOD00119)
DB00134	Methionine	FDB010504	4-Hydroxybenzaldehyde	DDI type 7	The metabolism of 4-Hydroxybenzaldehyde can be increased when combined with Methionine.	0.998499	FALSE	FALSE	Vinegar (FOOD00628), Oat (FOOD00022)
DB00134	Methionine	FDB010508	4-Hydroxybenzoic acid	DDI type 7	The metabolism of 4-Hydroxybenzoic acid can be increased when combined with Methionine.	0.983494	FALSE	FALSE	Red huckleberry (FOOD00223), Rabbiteye blueberry (FOOD00898), Coriander (FOOD00061), Garden onion (FOOD00006), Loquat (FOOD00076), Highbush blueberry (FOOD00191), Olive (FOOD00121), Strawberry (FOOD00083), Swiss chard (FOOD00237), Carrot (FOOD00245)
DB00134	Methionine	FDB010508	4-Hydroxybenzoic acid	DDI type 13	The therapeutic efficacy of Methionine can be decreased when used in combination with 4-Hydroxybenzoic acid.	0.958464	TRUE	FALSE	Red huckleberry (FOOD00223), Rabbiteye blueberry (FOOD00898), Coriander (FOOD00061), Garden onion (FOOD00006), Loquat (FOOD00076), Highbush blueberry (FOOD00191), Olive (FOOD00121), Strawberry (FOOD00083), Swiss chard (FOOD00237), Carrot (FOOD00245)
DB00134	Methionine	FDB010527	Zingerone	DDI type 26	The risk or severity of adverse effects can be increased when Methionine is combined with Zingerone.	0.999534	TRUE	TRUE	Pot marjoram (FOOD00123), Ginger (FOOD00206)
DB00134	Methionine	FDB010534	4-Hydroxyphenylacetic acid	DDI type 13	The therapeutic efficacy of 4-Hydroxyphenylacetic acid can be decreased when used in combination with Methionine.	0.994928	FALSE	FALSE	Olive (FOOD00121), American cranberry (FOOD00192), Grape wine (FOOD00612), Corn (FOOD00205), Beer (FOOD00268), Oat (FOOD00022)
DB00134	Methionine	FDB010560	Ethyl phenylacetate	DDI type 26	The risk or severity of adverse effects can be increased when Methionine is combined with Ethyl phenylacetate.	0.98887	TRUE	TRUE	Corn (FOOD00205)
DB00134	Methionine	FDB010560	Ethyl phenylacetate	DDI type 26	The risk or severity of adverse effects can be increased when Ethyl phenylacetate is combined with Methionine.	0.999921	TRUE	TRUE	Corn (FOOD00205)
DB00134	Methionine	FDB010563	1-Phenylethyl acetate	DDI type 26	The risk or severity of adverse effects can be increased when Methionine is combined with 1-Phenylethyl acetate.	0.998888	TRUE	TRUE	Cloves (FOOD00179)
DB00134	Methionine	FDB010563	1-Phenylethyl acetate	DDI type 26	The risk or severity of adverse effects can be increased when 1-Phenylethyl acetate is combined with Methionine.	0.999877	TRUE	TRUE	Cloves (FOOD00179)
DB00134	Methionine	FDB010580	2-Phenylethylamine	DDI type 26	The risk or severity of adverse effects can be increased when Methionine is combined with 2-Phenylethylamine.	0.999972	TRUE	TRUE	Red raspberry (FOOD00162), Cabbage (FOOD00851), White cabbage (FOOD00887), Broccoli (FOOD00034), Swiss chard (FOOD00237), Turnip (FOOD00036), Nanking cherry (FOOD00885), Eggplant (FOOD00174), Spinach (FOOD00178), Orange bell pepper (FOOD00879)
DB00134	Methionine	FDB010580	2-Phenylethylamine	DDI type 26	The risk or severity of adverse effects can be increased when 2-Phenylethylamine is combined with Methionine.	0.999941	TRUE	TRUE	Red raspberry (FOOD00162), Cabbage (FOOD00851), White cabbage (FOOD00887), Broccoli (FOOD00034), Swiss chard (FOOD00237), Turnip (FOOD00036), Nanking cherry (FOOD00885), Eggplant (FOOD00174), Spinach (FOOD00178), Orange bell pepper (FOOD00879)
DB00134	Methionine	FDB010581	N-Methylphenethylamine	DDI type 26	The risk or severity of adverse effects can be increased when Methionine is combined with N-Methylphenethylamine.	0.999948	TRUE	TRUE	Cabbage (FOOD00851), White cabbage (FOOD00887), Carrot (FOOD00245), Wild carrot (FOOD00072), Apple (FOOD00105), Corn (FOOD00205)
DB00134	Methionine	FDB010581	N-Methylphenethylamine	DDI type 26	The risk or severity of adverse effects can be increased when N-Methylphenethylamine is combined with Methionine.	0.999842	TRUE	TRUE	Cabbage (FOOD00851), White cabbage (FOOD00887), Carrot (FOOD00245), Wild carrot (FOOD00072), Apple (FOOD00105), Corn (FOOD00205)
DB00134	Methionine	FDB010583	Octopamine	DDI type 26	The risk or severity of adverse effects can be increased when Methionine is combined with Octopamine.	0.998067	TRUE	TRUE	Mandarin orange (Clementine, Tangerine) (FOOD00056), Sweet orange (FOOD00057)
DB00134	Methionine	FDB010588	Methyl 4-methoxybenzoate	DDI type 26	The risk or severity of adverse effects can be increased when Methionine is combined with Methyl 4-methoxybenzoate.	0.998069	TRUE	TRUE	Star anise (FOOD00090)
DB00134	Methionine	FDB010778	N-trans-p-Coumaroyloctopamine	DDI type 26	The risk or severity of adverse effects can be increased when Methionine is combined with N-trans-p-Coumaroyloctopamine.	0.99955	TRUE	TRUE	Green bell pepper (FOOD00877), Orange bell pepper (FOOD00879), Pepper (FOOD00040), Red bell pepper (FOOD00880), Yellow bell pepper (FOOD00878)
DB00134	Methionine	FDB010778	N-trans-p-Coumaroyloctopamine	DDI type 26	The risk or severity of adverse effects can be increased when N-trans-p-Coumaroyloctopamine is combined with Methionine.	0.999342	TRUE	TRUE	Green bell pepper (FOOD00877), Orange bell pepper (FOOD00879), Pepper (FOOD00040), Red bell pepper (FOOD00880), Yellow bell pepper (FOOD00878)
DB00134	Methionine	FDB010779	N-trans-Feruloyloctopamine	DDI type 26	The risk or severity of adverse effects can be increased when Methionine is combined with N-trans-Feruloyloctopamine.	0.999845	TRUE	TRUE	Green bell pepper (FOOD00877), Orange bell pepper (FOOD00879), Pepper (FOOD00040), Red bell pepper (FOOD00880), Yellow bell pepper (FOOD00878)
DB00134	Methionine	FDB010779	N-trans-Feruloyloctopamine	DDI type 26	The risk or severity of adverse effects can be increased when N-trans-Feruloyloctopamine is combined with Methionine.	0.999435	TRUE	TRUE	Green bell pepper (FOOD00877), Orange bell pepper (FOOD00879), Pepper (FOOD00040), Red bell pepper (FOOD00880), Yellow bell pepper (FOOD00878)
DB00134	Methionine	FDB010873	1-(4-Methoxyphenyl)-2-propanone	DDI type 26	The risk or severity of adverse effects can be increased when Methionine is combined with 1-(4-Methoxyphenyl)-2-propanone.	0.999561	TRUE	TRUE	Anise (FOOD00137)
DB00134	Methionine	FDB010873	1-(4-Methoxyphenyl)-2-propanone	DDI type 26	The risk or severity of adverse effects can be increased when 1-(4-Methoxyphenyl)-2-propanone is combined with Methionine.	0.991446	TRUE	TRUE	Anise (FOOD00137)
DB00134	Methionine	FDB011258	o-Coumaric acid	DDI type 7	The metabolism of o-Coumaric acid can be increased when combined with Methionine.	0.986216	FALSE	FALSE	Corn (FOOD00205), Hard wheat (FOOD00242), Olive (FOOD00121), American cranberry (FOOD00192), Fennel (FOOD00082), Date (FOOD00135), Peanut (FOOD00016), Common wheat (FOOD00187), Beer (FOOD00268), Grape wine (FOOD00612)
DB00134	Methionine	FDB011261	Dibutyl phthalate	DDI type 26	The risk or severity of adverse effects can be increased when Dibutyl phthalate is combined with Methionine.	0.97894	TRUE	TRUE	Kohlrabi (FOOD00033)
DB00134	Methionine	FDB011417	3-Phenylpropyl acetate	DDI type 26	The risk or severity of adverse effects can be increased when Methionine is combined with 3-Phenylpropyl acetate.	0.998175	TRUE	TRUE	Ceylon cinnamon (FOOD00051)
DB00134	Methionine	FDB011417	3-Phenylpropyl acetate	DDI type 26	The risk or severity of adverse effects can be increased when 3-Phenylpropyl acetate is combined with Methionine.	0.99988	TRUE	TRUE	Ceylon cinnamon (FOOD00051)
DB00134	Methionine	FDB011546	24-Methylenelophenol	DDI type 26	The risk or severity of adverse effects can be increased when Methionine is combined with 24-Methylenelophenol.	0.999661	TRUE	TRUE	Evening primrose (FOOD00120)
DB00134	Methionine	FDB011703	(S)-[8]-Gingerol	DDI type 6	The metabolism of Methionine can be decreased when combined with (S)-[8]-Gingerol.	0.975449	TRUE	FALSE	Ginger (FOOD00206)
DB00134	Methionine	FDB011703	(S)-[8]-Gingerol	DDI type 26	The risk or severity of adverse effects can be increased when (S)-[8]-Gingerol is combined with Methionine.	0.996199	TRUE	TRUE	Ginger (FOOD00206)
DB00134	Methionine	FDB011708	Hexyl butyrate	DDI type 26	The risk or severity of adverse effects can be increased when Hexyl butyrate is combined with Methionine.	0.99991	TRUE	TRUE	Passion fruit (FOOD00128)
DB00134	Methionine	FDB011794	(R)-3-Octyl acetate	DDI type 26	The risk or severity of adverse effects can be increased when Methionine is combined with (R)-3-Octyl acetate.	0.964148	TRUE	TRUE	Spearmint (FOOD00112)
DB00134	Methionine	FDB011794	(R)-3-Octyl acetate	DDI type 26	The risk or severity of adverse effects can be increased when (R)-3-Octyl acetate is combined with Methionine.	0.999384	TRUE	TRUE	Spearmint (FOOD00112)
DB00134	Methionine	FDB011835	3-Phenylpropanal	DDI type 26	The risk or severity of adverse effects can be increased when Methionine is combined with 3-Phenylpropanal.	0.999899	TRUE	TRUE	Ceylon cinnamon (FOOD00051)
DB00134	Methionine	FDB011835	3-Phenylpropanal	DDI type 26	The risk or severity of adverse effects can be increased when 3-Phenylpropanal is combined with Methionine.	0.992101	TRUE	TRUE	Ceylon cinnamon (FOOD00051)
DB00134	Methionine	FDB011952	Hexadecane	DDI type 26	The risk or severity of adverse effects can be increased when Methionine is combined with Hexadecane.	0.957639	TRUE	TRUE	Black walnut (FOOD00093)
DB00134	Methionine	FDB011952	Hexadecane	DDI type 26	The risk or severity of adverse effects can be increased when Hexadecane is combined with Methionine.	0.999972	TRUE	TRUE	Black walnut (FOOD00093)
DB00134	Methionine	FDB012027	Decanoic acid	DDI type 26	The risk or severity of adverse effects can be increased when Decanoic acid is combined with Methionine.	0.998512	TRUE	TRUE	Babassu palm (FOOD00773), Coconut (FOOD00336), Butterfat (FOOD00760), Butter (FOOD00648), Oil palm (FOOD00591), Coffee mocha (FOOD00743), Common sage (FOOD00165), Margarine-like spread (FOOD00844), Cream (FOOD00650), Ucuhuba (FOOD00777)
DB00134	Methionine	FDB012059	Benzylamine	DDI type 26	The risk or severity of adverse effects can be increased when Methionine is combined with Benzylamine.	0.999981	TRUE	TRUE	Corn (FOOD00205), Cabbage (FOOD00851), White cabbage (FOOD00887), Carrot (FOOD00245), Wild carrot (FOOD00072), Apple (FOOD00105)
DB00134	Methionine	FDB012059	Benzylamine	DDI type 26	The risk or severity of adverse effects can be increased when Benzylamine is combined with Methionine.	0.999943	TRUE	TRUE	Corn (FOOD00205), Cabbage (FOOD00851), White cabbage (FOOD00887), Carrot (FOOD00245), Wild carrot (FOOD00072), Apple (FOOD00105)
DB00134	Methionine	FDB012152	2-Phenylethanol	DDI type 26	The risk or severity of adverse effects can be increased when Methionine is combined with 2-Phenylethanol.	0.999906	TRUE	TRUE	Black walnut (FOOD00093), Sweet basil (FOOD00119), Ceylon cinnamon (FOOD00051), Peppermint (FOOD00113), Highbush blueberry (FOOD00191), Bilberry (FOOD00193)
DB00134	Methionine	FDB012152	2-Phenylethanol	DDI type 26	The risk or severity of adverse effects can be increased when 2-Phenylethanol is combined with Methionine.	0.999792	TRUE	TRUE	Black walnut (FOOD00093), Sweet basil (FOOD00119), Ceylon cinnamon (FOOD00051), Peppermint (FOOD00113), Highbush blueberry (FOOD00191), Bilberry (FOOD00193)
DB00134	Methionine	FDB012153	2-Phenylethyl acetate	DDI type 26	The risk or severity of adverse effects can be increased when Methionine is combined with 2-Phenylethyl acetate.	0.998778	TRUE	TRUE	Ceylon cinnamon (FOOD00051), Cloves (FOOD00179)
DB00134	Methionine	FDB012153	2-Phenylethyl acetate	DDI type 26	The risk or severity of adverse effects can be increased when 2-Phenylethyl acetate is combined with Methionine.	0.999944	TRUE	TRUE	Ceylon cinnamon (FOOD00051), Cloves (FOOD00179)
DB00134	Methionine	FDB012158	Serotonin	DDI type 26	The risk or severity of adverse effects can be increased when Methionine is combined with Serotonin.	0.999979	TRUE	TRUE	Sea-buckthornberry (FOOD00087), Common walnut (FOOD00094), Oat (FOOD00022), Swiss chard (FOOD00237), Pineapple (FOOD00012), Nanking cherry (FOOD00885), Barley (FOOD00088), Rye (FOOD00169), Pomegranate (FOOD00151), Date (FOOD00135)
DB00134	Methionine	FDB012158	Serotonin	DDI type 26	The risk or severity of adverse effects can be increased when Serotonin is combined with Methionine.	0.999981	TRUE	TRUE	Sea-buckthornberry (FOOD00087), Common walnut (FOOD00094), Oat (FOOD00022), Swiss chard (FOOD00237), Pineapple (FOOD00012), Nanking cherry (FOOD00885), Barley (FOOD00088), Rye (FOOD00169), Pomegranate (FOOD00151), Date (FOOD00135)
DB00134	Methionine	FDB012163	Dopamine	DDI type 26	The risk or severity of adverse effects can be increased when Methionine is combined with Dopamine.	0.998905	TRUE	TRUE	Swiss chard (FOOD00237), Oat (FOOD00022), Red beetroot (FOOD00264), Rye (FOOD00169), Wheat (FOOD00561), Barley (FOOD00088), Red raspberry (FOOD00162), Dill (FOOD00013), Yellow wax bean (FOOD00882), Green zucchini (FOOD00875)
DB00134	Methionine	FDB012171	Eugenol	DDI type 26	The risk or severity of adverse effects can be increased when Methionine is combined with Eugenol.	0.999853	TRUE	TRUE	Cloves (FOOD00179), Allspice (FOOD00287), Carrot (FOOD00245), Wild carrot (FOOD00072), Sweet basil (FOOD00119), Turmeric (FOOD00068), Ceylon cinnamon (FOOD00051), Sweet marjoram (FOOD00122), Sweet bay (FOOD00097), Hyssop (FOOD00089)
DB00134	Methionine	FDB012188	3-Phenyl-1-propanol	DDI type 26	The risk or severity of adverse effects can be increased when Methionine is combined with 3-Phenyl-1-propanol.	0.999933	TRUE	TRUE	Bilberry (FOOD00193)
DB00134	Methionine	FDB012188	3-Phenyl-1-propanol	DDI type 26	The risk or severity of adverse effects can be increased when 3-Phenyl-1-propanol is combined with Methionine.	0.991257	TRUE	TRUE	Bilberry (FOOD00193)
DB00134	Methionine	FDB012268	Isopropylbenzene	DDI type 26	The risk or severity of adverse effects can be increased when Isopropylbenzene is combined with Methionine.	0.999947	TRUE	TRUE	Ceylon cinnamon (FOOD00051), Ginger (FOOD00206)
DB00134	Methionine	FDB012362	beta-Sitosterol	DDI type 26	The risk or severity of adverse effects can be increased when Methionine is combined with beta-Sitosterol.	0.999174	TRUE	TRUE	Cherimoya (FOOD00326), Canola (FOOD00772), Margarine (FOOD00843), Sesame (FOOD00170), Flaxseed (FOOD00101), Pistachio (FOOD00140), Common buckwheat (FOOD00079), Evening primrose (FOOD00120), Sunflower (FOOD00086), Shortening (FOOD00783)
DB00134	Methionine	FDB012411	Capsaicin	DDI type 26	The risk or severity of adverse effects can be increased when Capsaicin is combined with Methionine.	0.994432	TRUE	TRUE	Green bell pepper (FOOD00877), Orange bell pepper (FOOD00879), Pepper (FOOD00040), Red bell pepper (FOOD00880), Yellow bell pepper (FOOD00878), Pepper (C. frutescens) (FOOD00428)
DB00134	Methionine	FDB012435	Ethyl tetradecanoate	DDI type 26	The risk or severity of adverse effects can be increased when Methionine is combined with Ethyl tetradecanoate.	0.994559	TRUE	TRUE	Coriander (FOOD00061)
DB00134	Methionine	FDB012435	Ethyl tetradecanoate	DDI type 26	The risk or severity of adverse effects can be increased when Ethyl tetradecanoate is combined with Methionine.	0.999991	TRUE	TRUE	Coriander (FOOD00061)
DB00134	Methionine	FDB012441	Ethyl stearate	DDI type 26	The risk or severity of adverse effects can be increased when Ethyl stearate is combined with Methionine.	0.999926	TRUE	TRUE	Coriander (FOOD00061)
DB00134	Methionine	FDB012445	(±)-Isobornyl acetate	DDI type 26	The risk or severity of adverse effects can be increased when Methionine is combined with (±)-Isobornyl acetate.	0.999966	TRUE	TRUE	Spearmint (FOOD00112)
DB00134	Methionine	FDB012445	(±)-Isobornyl acetate	DDI type 26	The risk or severity of adverse effects can be increased when (±)-Isobornyl acetate is combined with Methionine.	0.999111	TRUE	TRUE	Spearmint (FOOD00112)
DB00134	Methionine	FDB012446	(±)-Citronellyl acetate	DDI type 26	The risk or severity of adverse effects can be increased when Methionine is combined with (±)-Citronellyl acetate.	0.991952	TRUE	TRUE	Carrot (FOOD00245), Wild carrot (FOOD00072), Lemon (FOOD00054), Mandarin orange (Clementine, Tangerine) (FOOD00056)
DB00134	Methionine	FDB012456	2-Hydroxybenzaldehyde	DDI type 7	The metabolism of 2-Hydroxybenzaldehyde can be increased when combined with Methionine.	0.953242	FALSE	FALSE	Peppermint (FOOD00113)
DB00134	Methionine	FDB012485	Nicotinamide	DDI type 13	The therapeutic efficacy of Methionine can be decreased when used in combination with Nicotinamide.	0.998692	TRUE	FALSE	Common sage (FOOD00165), Cocoa bean (FOOD00182), Common pea (FOOD00141)
DB00134	Methionine	FDB012494	Clerosterol	DDI type 26	The risk or severity of adverse effects can be increased when Methionine is combined with Clerosterol.	0.999383	TRUE	TRUE	Common walnut (FOOD00094)
DB00134	Methionine	FDB012521	Campesterol	DDI type 26	The risk or severity of adverse effects can be increased when Methionine is combined with Campesterol.	0.998416	TRUE	TRUE	Canola (FOOD00772), Cherimoya (FOOD00326), Flaxseed (FOOD00101), Margarine (FOOD00843), Soy bean (FOOD00085), Sesame (FOOD00170), Shortening (FOOD00783), Opium poppy (FOOD00438), Common buckwheat (FOOD00079), Sunflower (FOOD00086)
DB00134	Methionine	FDB012535	L-Glutamic acid	DDI type 26	The risk or severity of adverse effects can be increased when L-Glutamic acid is combined with Methionine.	0.997748	TRUE	TRUE	Casein (FOOD00659), Other soy product (FOOD00271), Beluga whale (FOOD00300), Gelatin (FOOD00663), Soy bean (FOOD00085), Gelatin dessert (FOOD00725), Meat bouillon (FOOD00657), Cottonseed (FOOD00341), Buttermilk (FOOD00692), Bearded seal (FOOD00466)
DB00134	Methionine	FDB012536	Glutamic acid	DDI type 26	The risk or severity of adverse effects can be increased when Glutamic acid is combined with Methionine.	0.997748	TRUE	TRUE	Red bell pepper (FOOD00880), Milk (Cow) (FOOD00618), Wheat (FOOD00561), Oat (FOOD00022), Rye (FOOD00169), Barley (FOOD00088), Swiss chard (FOOD00237), Red beetroot (FOOD00264), Dill (FOOD00013), White cabbage (FOOD00887)
DB00134	Methionine	FDB012569	Gondoic acid	DDI type 26	The risk or severity of adverse effects can be increased when Methionine is combined with Gondoic acid.	0.998495	TRUE	TRUE	Macadamia nut (FOOD00525)
DB00134	Methionine	FDB012569	Gondoic acid	DDI type 26	The risk or severity of adverse effects can be increased when Gondoic acid is combined with Methionine.	0.999895	TRUE	TRUE	Macadamia nut (FOOD00525)
DB00134	Methionine	FDB012583	1-Octanol	DDI type 26	The risk or severity of adverse effects can be increased when Methionine is combined with 1-Octanol.	0.999947	TRUE	TRUE	Corn (FOOD00205), Coriander (FOOD00061), Spearmint (FOOD00112), Lemon (FOOD00054), Mandarin orange (Clementine, Tangerine) (FOOD00056), Lime (FOOD00053), Kohlrabi (FOOD00033)
DB00134	Methionine	FDB012583	1-Octanol	DDI type 26	The risk or severity of adverse effects can be increased when 1-Octanol is combined with Methionine.	0.990157	TRUE	TRUE	Corn (FOOD00205), Coriander (FOOD00061), Spearmint (FOOD00112), Lemon (FOOD00054), Mandarin orange (Clementine, Tangerine) (FOOD00056), Lime (FOOD00053), Kohlrabi (FOOD00033)
DB00134	Methionine	FDB012612	Ergosterol	DDI type 26	The risk or severity of adverse effects can be increased when Methionine is combined with Ergosterol.	0.998638	TRUE	TRUE	Common wheat (FOOD00187)
DB00134	Methionine	FDB012647	N-Methylbenzylamine	DDI type 26	The risk or severity of adverse effects can be increased when Methionine is combined with N-Methylbenzylamine.	0.999922	TRUE	TRUE	Carrot (FOOD00245), Wild carrot (FOOD00072)
DB00134	Methionine	FDB012647	N-Methylbenzylamine	DDI type 26	The risk or severity of adverse effects can be increased when N-Methylbenzylamine is combined with Methionine.	0.999971	TRUE	TRUE	Carrot (FOOD00245), Wild carrot (FOOD00072)
DB00134	Methionine	FDB012660	Secoisolariciresinol	DDI type 26	The risk or severity of adverse effects can be increased when Methionine is combined with Secoisolariciresinol.	0.999944	TRUE	TRUE	Flaxseed (FOOD00101), Rye bread (FOOD00809), Asparagus (FOOD00021), Common buckwheat (FOOD00079), Kiwi (FOOD00004), Sesame (FOOD00170), Sunflower (FOOD00086), Soy bean (FOOD00085), Rye (FOOD00169), Black tea (FOOD00907)
DB00134	Methionine	FDB012660	Secoisolariciresinol	DDI type 26	The risk or severity of adverse effects can be increased when Secoisolariciresinol is combined with Methionine.	0.999913	TRUE	TRUE	Flaxseed (FOOD00101), Rye bread (FOOD00809), Asparagus (FOOD00021), Common buckwheat (FOOD00079), Kiwi (FOOD00004), Sesame (FOOD00170), Sunflower (FOOD00086), Soy bean (FOOD00085), Rye (FOOD00169), Black tea (FOOD00907)
DB00134	Methionine	FDB012675	S-Allylcysteine	DDI type 26	The risk or severity of adverse effects can be increased when S-Allylcysteine is combined with Methionine.	0.991833	TRUE	TRUE	Soft-necked garlic (FOOD00850)
DB00134	Methionine	FDB012696	Dolichosterone	DDI type 26	The risk or severity of adverse effects can be increased when Methionine is combined with Dolichosterone.	0.99797	TRUE	TRUE	Rice (FOOD00125)
DB00134	Methionine	FDB012732	Vitamin D3	DDI type 26	The risk or severity of adverse effects can be increased when Methionine is combined with Vitamin D3.	0.999506	TRUE	TRUE	Common carp (FOOD00322), Lake trout (FOOD00582), Chinook salmon (FOOD00454), Atlantic mackerel (FOOD00293), Swordfish (FOOD00487), Cisco (FOOD00334), Greater sturgeon (FOOD00483), Sockeye salmon (FOOD00453), Rainbow trout (FOOD00444), Pink salmon (FOOD00450)
DB00134	Methionine	FDB012733	delta7-Avenasterol	DDI type 26	The risk or severity of adverse effects can be increased when Methionine is combined with delta7-Avenasterol.	0.999682	TRUE	TRUE	Common walnut (FOOD00094)
DB00134	Methionine	FDB012750	Hordenine	DDI type 26	The risk or severity of adverse effects can be increased when Methionine is combined with Hordenine.	0.999959	TRUE	TRUE	Barley (FOOD00088)
DB00134	Methionine	FDB012750	Hordenine	DDI type 26	The risk or severity of adverse effects can be increased when Hordenine is combined with Methionine.	0.997545	TRUE	TRUE	Barley (FOOD00088)
DB00134	Methionine	FDB012755	1-(4-Methylphenyl)ethanol	DDI type 26	The risk or severity of adverse effects can be increased when Methionine is combined with 1-(4-Methylphenyl)ethanol.	0.99973	TRUE	TRUE	Turmeric (FOOD00068)
DB00134	Methionine	FDB012755	1-(4-Methylphenyl)ethanol	DDI type 26	The risk or severity of adverse effects can be increased when 1-(4-Methylphenyl)ethanol is combined with Methionine.	0.995792	TRUE	TRUE	Turmeric (FOOD00068)
DB00134	Methionine	FDB012760	(Z,Z)-9,12-Octadecadienoic acid	DDI type 26	The risk or severity of adverse effects can be increased when Methionine is combined with (Z,Z)-9,12-Octadecadienoic acid.	0.982791	TRUE	TRUE	Thistle (FOOD00606), Cooking oil (FOOD00779), Walnut (FOOD00608), Common walnut (FOOD00094), Borage (FOOD00026), Pine nut (FOOD00138), Butternut (FOOD00316), Poppy (FOOD00127), Opium poppy (FOOD00438), Safflower (FOOD00042)
DB00134	Methionine	FDB012765	Petroselinic acid	DDI type 26	The risk or severity of adverse effects can be increased when Methionine is combined with Petroselinic acid.	0.998059	TRUE	TRUE	Parsley (FOOD00131), Carrot (FOOD00245), Wild carrot (FOOD00072), Anise (FOOD00137), Parsnip (FOOD00129), Coriander (FOOD00061), Chervil (FOOD00327), Caraway (FOOD00043)
DB00134	Methionine	FDB012765	Petroselinic acid	DDI type 26	The risk or severity of adverse effects can be increased when Petroselinic acid is combined with Methionine.	0.999884	TRUE	TRUE	Parsley (FOOD00131), Carrot (FOOD00245), Wild carrot (FOOD00072), Anise (FOOD00137), Parsnip (FOOD00129), Coriander (FOOD00061), Chervil (FOOD00327), Caraway (FOOD00043)
DB00134	Methionine	FDB012798	Estrone	DDI type 7	The metabolism of Estrone can be increased when combined with Methionine.	0.999423	FALSE	FALSE	Pomegranate (FOOD00151), Apple (FOOD00105)
DB00134	Methionine	FDB012798	Estrone	DDI type 26	The risk or severity of adverse effects can be increased when Estrone is combined with Methionine.	0.974037	TRUE	TRUE	Pomegranate (FOOD00151), Apple (FOOD00105)
DB00134	Methionine	FDB012811	Ergocalciferol	DDI type 26	The risk or severity of adverse effects can be increased when Methionine is combined with Ergocalciferol.	0.993238	TRUE	TRUE	Maitake (FOOD00555), Morchella (Morel) (FOOD00731), Shiitake (FOOD00548), Other beverage (FOOD00667), Enokitake (FOOD00551), Milk (Cow) (FOOD00618)
DB00134	Methionine	FDB012844	Benzyl benzoate	DDI type 26	The risk or severity of adverse effects can be increased when Benzyl benzoate is combined with Methionine.	0.997065	TRUE	TRUE	Ceylon cinnamon (FOOD00051)
DB00134	Methionine	FDB012858	Oleic acid	DDI type 26	The risk or severity of adverse effects can be increased when Methionine is combined with Oleic acid.	0.998059	TRUE	TRUE	Rape (FOOD00029), Common hazelnut (FOOD00062), Macadamia nut (FOOD00525), Pecan nut (FOOD00044), Other animal fat (FOOD00682), Lard (FOOD00681), Hazelnut (FOOD00376), Tallow (FOOD00674), Safflower (FOOD00042), Cocoa butter (FOOD00684)
DB00134	Methionine	FDB012858	Oleic acid	DDI type 26	The risk or severity of adverse effects can be increased when Oleic acid is combined with Methionine.	0.999884	TRUE	TRUE	Rape (FOOD00029), Common hazelnut (FOOD00062), Macadamia nut (FOOD00525), Pecan nut (FOOD00044), Other animal fat (FOOD00682), Lard (FOOD00681), Hazelnut (FOOD00376), Tallow (FOOD00674), Safflower (FOOD00042), Cocoa butter (FOOD00684)
DB00134	Methionine	FDB012991	Pristane	DDI type 26	The risk or severity of adverse effects can be increased when Pristane is combined with Methionine.	0.988163	TRUE	TRUE	Common sage (FOOD00165)
DB00134	Methionine	FDB013245	(±)-Phenylalanine	DDI type 26	The risk or severity of adverse effects can be increased when Methionine is combined with (±)-Phenylalanine.	0.995035	TRUE	TRUE	Red bell pepper (FOOD00880), Wheat (FOOD00561), Oat (FOOD00022), Barley (FOOD00088), Rye (FOOD00169), Dill (FOOD00013), Broccoli (FOOD00034), Japanese pumpkin (FOOD00886), Spinach (FOOD00178), Swiss chard (FOOD00237)
DB00134	Methionine	FDB013245	(±)-Phenylalanine	DDI type 26	The risk or severity of adverse effects can be increased when (±)-Phenylalanine is combined with Methionine.	0.999943	TRUE	TRUE	Red bell pepper (FOOD00880), Wheat (FOOD00561), Oat (FOOD00022), Barley (FOOD00088), Rye (FOOD00169), Dill (FOOD00013), Broccoli (FOOD00034), Japanese pumpkin (FOOD00886), Spinach (FOOD00178), Swiss chard (FOOD00237)
DB00134	Methionine	FDB013257	Gingerenone C	DDI type 26	The risk or severity of adverse effects can be increased when Methionine is combined with Gingerenone C.	0.999592	TRUE	TRUE	Ginger (FOOD00206)
DB00134	Methionine	FDB013257	Gingerenone C	DDI type 26	The risk or severity of adverse effects can be increased when Gingerenone C is combined with Methionine.	0.970256	TRUE	TRUE	Ginger (FOOD00206)
DB00134	Methionine	FDB013269	Cholesterol	DDI type 26	The risk or severity of adverse effects can be increased when Methionine is combined with Cholesterol.	0.999383	TRUE	TRUE	Eggs (FOOD00619), Fish oil (FOOD00990), Sturgeon (FOOD00570), Haddock (FOOD00374), Butter (FOOD00648), Anatidae (FOOD00576), Crayfish (FOOD00534), Clawed lobster (FOOD00584), Other fish product (FOOD00665), Tallow (FOOD00674)
DB00134	Methionine	FDB013522	Fenchol	DDI type 26	The risk or severity of adverse effects can be increased when Methionine is combined with Fenchol.	0.999871	TRUE	TRUE	Sweet basil (FOOD00119), Lime (FOOD00053)
DB00134	Methionine	FDB013522	Fenchol	DDI type 26	The risk or severity of adverse effects can be increased when Fenchol is combined with Methionine.	0.999813	TRUE	TRUE	Sweet basil (FOOD00119), Lime (FOOD00053)
DB00134	Methionine	FDB013574	(±)-Borneol	DDI type 26	The risk or severity of adverse effects can be increased when Methionine is combined with (±)-Borneol.	0.999877	TRUE	TRUE	Common sage (FOOD00165), Cardamom (FOOD00074), Rosemary (FOOD00159), Pot marjoram (FOOD00123), Common thyme (FOOD00183), Spearmint (FOOD00112), Common oregano (FOOD00124), Lime (FOOD00053), Coriander (FOOD00061), Ceylon cinnamon (FOOD00051)
DB00134	Methionine	FDB013574	(±)-Borneol	DDI type 26	The risk or severity of adverse effects can be increased when (±)-Borneol is combined with Methionine.	0.999815	TRUE	TRUE	Common sage (FOOD00165), Cardamom (FOOD00074), Rosemary (FOOD00159), Pot marjoram (FOOD00123), Common thyme (FOOD00183), Spearmint (FOOD00112), Common oregano (FOOD00124), Lime (FOOD00053), Coriander (FOOD00061), Ceylon cinnamon (FOOD00051)
DB00134	Methionine	FDB013612	3-Methylbutyl phenylacetate	DDI type 26	The risk or severity of adverse effects can be increased when Methionine is combined with 3-Methylbutyl phenylacetate.	0.998152	TRUE	TRUE	Peppermint (FOOD00113)
DB00134	Methionine	FDB013621	2-Phenylethyl pentanoate	DDI type 26	The risk or severity of adverse effects can be increased when Methionine is combined with 2-Phenylethyl pentanoate.	0.955571	TRUE	TRUE	Peppermint (FOOD00113)
DB00134	Methionine	FDB013828	Retinol	DDI type 26	The risk or severity of adverse effects can be increased when Methionine is combined with Retinol.	0.999709	TRUE	TRUE	Haddock (FOOD00374), Gadus (Common cod) (FOOD00515), Anatidae (FOOD00576), Anguilliformes (FOOD00577), Spotted seal (FOOD00423), Butterfat (FOOD00760), Margarine (FOOD00843), Margarine-like spread (FOOD00844), Northern bluefin tuna (FOOD00305), Butter (FOOD00648)
DB00134	Methionine	FDB013828	Retinol	DDI type 26	The risk or severity of adverse effects can be increased when Retinol is combined with Methionine.	0.9997	TRUE	TRUE	Haddock (FOOD00374), Gadus (Common cod) (FOOD00515), Anatidae (FOOD00576), Anguilliformes (FOOD00577), Spotted seal (FOOD00423), Butterfat (FOOD00760), Margarine (FOOD00843), Margarine-like spread (FOOD00844), Northern bluefin tuna (FOOD00305), Butter (FOOD00648)
DB00134	Methionine	FDB013868	4-Isopropyl-2-methoxy-1-methylbenzene	DDI type 26	The risk or severity of adverse effects can be increased when Methionine is combined with 4-Isopropyl-2-methoxy-1-methylbenzene.	0.999913	TRUE	TRUE	Pot marjoram (FOOD00123)
DB00134	Methionine	FDB013868	4-Isopropyl-2-methoxy-1-methylbenzene	DDI type 26	The risk or severity of adverse effects can be increased when 4-Isopropyl-2-methoxy-1-methylbenzene is combined with Methionine.	0.999772	TRUE	TRUE	Pot marjoram (FOOD00123)
DB00134	Methionine	FDB013875	Dimethylmatairesinol	DDI type 26	The risk or severity of adverse effects can be increased when Methionine is combined with Dimethylmatairesinol.	0.999908	TRUE	TRUE	Sesame (FOOD00170)
DB00134	Methionine	FDB013875	Dimethylmatairesinol	DDI type 26	The risk or severity of adverse effects can be increased when Dimethylmatairesinol is combined with Methionine.	0.999948	TRUE	TRUE	Sesame (FOOD00170)
DB00134	Methionine	FDB013897	Hexanoic acid	DDI type 26	The risk or severity of adverse effects can be increased when Hexanoic acid is combined with Methionine.	0.999876	TRUE	TRUE	Butterfat (FOOD00760), Butter (FOOD00648), Cream (FOOD00650), Margarine-like spread (FOOD00844), Coconut (FOOD00336), Cheese (FOOD00617), Dried milk (FOOD00689), Processed cheese (FOOD00711), Babassu palm (FOOD00773), Dulce de leche (FOOD00714)
DB00134	Methionine	FDB014346	Hexanenitrile	DDI type 26	The risk or severity of adverse effects can be increased when Methionine is combined with Hexanenitrile.	0.98421	TRUE	TRUE	Kohlrabi (FOOD00033)
DB00134	Methionine	FDB014346	Hexanenitrile	DDI type 26	The risk or severity of adverse effects can be increased when Hexanenitrile is combined with Methionine.	0.999959	TRUE	TRUE	Kohlrabi (FOOD00033)
DB00134	Methionine	FDB014490	Citronellol	DDI type 26	The risk or severity of adverse effects can be increased when Methionine is combined with Citronellol.	0.999951	TRUE	TRUE	Ginger (FOOD00206), Sweet basil (FOOD00119), Lemon balm (FOOD00108), Cardamom (FOOD00074), Mandarin orange (Clementine, Tangerine) (FOOD00056), Coriander (FOOD00061), Highbush blueberry (FOOD00191), Bilberry (FOOD00193)
DB00134	Methionine	FDB014512	5-Isopropyl-2-methylphenol	DDI type 26	The risk or severity of adverse effects can be increased when Methionine is combined with 5-Isopropyl-2-methylphenol.	0.999602	TRUE	TRUE	Pot marjoram (FOOD00123), Common thyme (FOOD00183), Black walnut (FOOD00093), Sweet marjoram (FOOD00122), Summer savory (FOOD00167), Common oregano (FOOD00124), Corn (FOOD00205), Rosemary (FOOD00159), Hyssop (FOOD00089)
DB00134	Methionine	FDB014512	5-Isopropyl-2-methylphenol	DDI type 26	The risk or severity of adverse effects can be increased when 5-Isopropyl-2-methylphenol is combined with Methionine.	0.999777	TRUE	TRUE	Pot marjoram (FOOD00123), Common thyme (FOOD00183), Black walnut (FOOD00093), Sweet marjoram (FOOD00122), Summer savory (FOOD00167), Common oregano (FOOD00124), Corn (FOOD00205), Rosemary (FOOD00159), Hyssop (FOOD00089)
DB00134	Methionine	FDB014580	(+)-Borneol	DDI type 26	The risk or severity of adverse effects can be increased when Methionine is combined with (+)-Borneol.	0.999877	TRUE	TRUE	Nutmeg (FOOD00118), Ginger (FOOD00206)
DB00134	Methionine	FDB014580	(+)-Borneol	DDI type 26	The risk or severity of adverse effects can be increased when (+)-Borneol is combined with Methionine.	0.999815	TRUE	TRUE	Nutmeg (FOOD00118), Ginger (FOOD00206)
DB00134	Methionine	FDB014582	(R)-Citronellal	DDI type 26	The risk or severity of adverse effects can be increased when Methionine is combined with (R)-Citronellal.	0.999834	TRUE	TRUE	Lemon balm (FOOD00108)
DB00134	Methionine	FDB014607	Citronellic acid	DDI type 26	The risk or severity of adverse effects can be increased when Methionine is combined with Citronellic acid.	0.995671	TRUE	TRUE	Lemon balm (FOOD00108), Peppermint (FOOD00113)
DB00134	Methionine	FDB014607	Citronellic acid	DDI type 26	The risk or severity of adverse effects can be increased when Citronellic acid is combined with Methionine.	0.981315	TRUE	TRUE	Lemon balm (FOOD00108), Peppermint (FOOD00113)
DB00134	Methionine	FDB014617	Citronellal	DDI type 26	The risk or severity of adverse effects can be increased when Methionine is combined with Citronellal.	0.999834	TRUE	TRUE	Lemon balm (FOOD00108), Lime (FOOD00053), Ginger (FOOD00206), Sweet orange (FOOD00057), Mandarin orange (Clementine, Tangerine) (FOOD00056)
DB00134	Methionine	FDB014795	2-Isopropyl-5-methylphenol	DDI type 26	The risk or severity of adverse effects can be increased when Methionine is combined with 2-Isopropyl-5-methylphenol.	0.999611	TRUE	TRUE	Black walnut (FOOD00093), Common thyme (FOOD00183), Common oregano (FOOD00124), Sweet basil (FOOD00119), Pot marjoram (FOOD00123), Mandarin orange (Clementine, Tangerine) (FOOD00056), Spearmint (FOOD00112), Hyssop (FOOD00089)
DB00134	Methionine	FDB014795	2-Isopropyl-5-methylphenol	DDI type 26	The risk or severity of adverse effects can be increased when 2-Isopropyl-5-methylphenol is combined with Methionine.	0.999807	TRUE	TRUE	Black walnut (FOOD00093), Common thyme (FOOD00183), Common oregano (FOOD00124), Sweet basil (FOOD00119), Pot marjoram (FOOD00123), Mandarin orange (Clementine, Tangerine) (FOOD00056), Spearmint (FOOD00112), Hyssop (FOOD00089)
DB00134	Methionine	FDB014796	2-Isopropyl-5-methylphenol acetate	DDI type 26	The risk or severity of adverse effects can be increased when Methionine is combined with 2-Isopropyl-5-methylphenol acetate.	0.998701	TRUE	TRUE	Pot marjoram (FOOD00123)
DB00134	Methionine	FDB014797	Thymol methyl ether	DDI type 26	The risk or severity of adverse effects can be increased when Methionine is combined with Thymol methyl ether.	0.99991	TRUE	TRUE	Common thyme (FOOD00183), Common oregano (FOOD00124), Mandarin orange (Clementine, Tangerine) (FOOD00056), Lime (FOOD00053), Sweet basil (FOOD00119)
DB00134	Methionine	FDB014797	Thymol methyl ether	DDI type 26	The risk or severity of adverse effects can be increased when Thymol methyl ether is combined with Methionine.	0.999786	TRUE	TRUE	Common thyme (FOOD00183), Common oregano (FOOD00124), Mandarin orange (Clementine, Tangerine) (FOOD00056), Lime (FOOD00053), Sweet basil (FOOD00119)
DB00134	Methionine	FDB014940	Linalool	DDI type 26	The risk or severity of adverse effects can be increased when Methionine is combined with Linalool.	0.999986	TRUE	TRUE	Spearmint (FOOD00112), Coriander (FOOD00061), Common thyme (FOOD00183), Cardamom (FOOD00074), Sweet basil (FOOD00119), Orange mint (FOOD00110), Sweet bay (FOOD00097), Common sage (FOOD00165), Turmeric (FOOD00068), Star anise (FOOD00090)
DB00134	Methionine	FDB014940	Linalool	DDI type 26	The risk or severity of adverse effects can be increased when Linalool is combined with Methionine.	0.999666	TRUE	TRUE	Spearmint (FOOD00112), Coriander (FOOD00061), Common thyme (FOOD00183), Cardamom (FOOD00074), Sweet basil (FOOD00119), Orange mint (FOOD00110), Sweet bay (FOOD00097), Common sage (FOOD00165), Turmeric (FOOD00068), Star anise (FOOD00090)
DB00134	Methionine	FDB014942	D-Linalool	DDI type 26	The risk or severity of adverse effects can be increased when Methionine is combined with D-Linalool.	0.999986	TRUE	TRUE	Sweet marjoram (FOOD00122)
DB00134	Methionine	FDB014942	D-Linalool	DDI type 26	The risk or severity of adverse effects can be increased when D-Linalool is combined with Methionine.	0.999666	TRUE	TRUE	Sweet marjoram (FOOD00122)
DB00134	Methionine	FDB015199	Nordihydrocapsaicin	DDI type 26	The risk or severity of adverse effects can be increased when Nordihydrocapsaicin is combined with Methionine.	0.999729	TRUE	TRUE	Green bell pepper (FOOD00877), Orange bell pepper (FOOD00879), Pepper (FOOD00040), Red bell pepper (FOOD00880), Yellow bell pepper (FOOD00878), Pepper (C. frutescens) (FOOD00428)
DB00134	Methionine	FDB015200	Homocapsaicin	DDI type 26	The risk or severity of adverse effects can be increased when Homocapsaicin is combined with Methionine.	0.991528	TRUE	TRUE	Green bell pepper (FOOD00877), Orange bell pepper (FOOD00879), Pepper (FOOD00040), Red bell pepper (FOOD00880), Yellow bell pepper (FOOD00878), Pepper (C. frutescens) (FOOD00428)
DB00134	Methionine	FDB015201	Homodihydrocapsaicin	DDI type 26	The risk or severity of adverse effects can be increased when Homodihydrocapsaicin is combined with Methionine.	0.999505	TRUE	TRUE	Green bell pepper (FOOD00877), Orange bell pepper (FOOD00879), Pepper (FOOD00040), Pepper (C. frutescens) (FOOD00428), Red bell pepper (FOOD00880), Yellow bell pepper (FOOD00878)
DB00134	Methionine	FDB015352	Geosmin	DDI type 26	The risk or severity of adverse effects can be increased when Methionine is combined with Geosmin.	0.99867	TRUE	TRUE	Corn (FOOD00205)
DB00134	Methionine	FDB015352	Geosmin	DDI type 26	The risk or severity of adverse effects can be increased when Geosmin is combined with Methionine.	0.998564	TRUE	TRUE	Corn (FOOD00205)
DB00134	Methionine	FDB015469	beta-Ionone	DDI type 26	The risk or severity of adverse effects can be increased when Methionine is combined with beta-Ionone.	0.999972	TRUE	TRUE	Corn (FOOD00205), Black tea (FOOD00907), Green tea (FOOD00908), Herbal tea (FOOD00989), Red tea (FOOD00925), Tea (FOOD00038), Carrot (FOOD00245), Wild carrot (FOOD00072), Common oregano (FOOD00124), Hyssop (FOOD00089)
DB00134	Methionine	FDB015469	beta-Ionone	DDI type 26	The risk or severity of adverse effects can be increased when beta-Ionone is combined with Methionine.	0.999954	TRUE	TRUE	Corn (FOOD00205), Black tea (FOOD00907), Green tea (FOOD00908), Herbal tea (FOOD00989), Red tea (FOOD00925), Tea (FOOD00038), Carrot (FOOD00245), Wild carrot (FOOD00072), Common oregano (FOOD00124), Hyssop (FOOD00089)
DB00134	Methionine	FDB015552	Sinensetin	DDI type 26	The risk or severity of adverse effects can be increased when Methionine is combined with Sinensetin.	0.999956	TRUE	TRUE	Sweet orange (FOOD00057)
DB00134	Methionine	FDB015552	Sinensetin	DDI type 26	The risk or severity of adverse effects can be increased when Sinensetin is combined with Methionine.	0.999221	TRUE	TRUE	Sweet orange (FOOD00057)
DB00134	Methionine	FDB015831	Phytoene	DDI type 26	The risk or severity of adverse effects can be increased when Methionine is combined with Phytoene.	0.998775	TRUE	TRUE	Sweet potato (FOOD00092), Sweet orange (FOOD00057)
DB00134	Methionine	FDB016033	1-Isopropyl-3-methylbenzene	DDI type 26	The risk or severity of adverse effects can be increased when Methionine is combined with 1-Isopropyl-3-methylbenzene.	0.999762	TRUE	TRUE	Sweet basil (FOOD00119), Blackcurrant (FOOD00155)
DB00134	Methionine	FDB016033	1-Isopropyl-3-methylbenzene	DDI type 26	The risk or severity of adverse effects can be increased when 1-Isopropyl-3-methylbenzene is combined with Methionine.	0.999912	TRUE	TRUE	Sweet basil (FOOD00119), Blackcurrant (FOOD00155)
DB00134	Methionine	FDB016232	Methyl citronellate	DDI type 26	The risk or severity of adverse effects can be increased when Methionine is combined with Methyl citronellate.	0.983825	TRUE	TRUE	Lemon balm (FOOD00108)
DB00134	Methionine	FDB017346	1,7,7-Trimethyltricyclo[2.2.1.02,6]heptane	DDI type 26	The risk or severity of adverse effects can be increased when Methionine is combined with 1,7,7-Trimethyltricyclo[2.2.1.02,6]heptane.	0.99979	TRUE	TRUE	Ginger (FOOD00206), Common sage (FOOD00165), Pot marjoram (FOOD00123)
DB00134	Methionine	FDB017346	1,7,7-Trimethyltricyclo[2.2.1.02,6]heptane	DDI type 26	The risk or severity of adverse effects can be increased when 1,7,7-Trimethyltricyclo[2.2.1.02,6]heptane is combined with Methionine.	0.999393	TRUE	TRUE	Ginger (FOOD00206), Common sage (FOOD00165), Pot marjoram (FOOD00123)
DB00134	Methionine	FDB017358	1-Isopropyl-4-methylbenzene	DDI type 26	The risk or severity of adverse effects can be increased when Methionine is combined with 1-Isopropyl-4-methylbenzene.	0.999862	TRUE	TRUE	Cardamom (FOOD00074), Common thyme (FOOD00183), Cumin (FOOD00067), Summer savory (FOOD00167), Dill (FOOD00013), Common oregano (FOOD00124), Turmeric (FOOD00068), Cornmint (FOOD00111), Pot marjoram (FOOD00123), Ginger (FOOD00206)
DB00134	Methionine	FDB017358	1-Isopropyl-4-methylbenzene	DDI type 26	The risk or severity of adverse effects can be increased when 1-Isopropyl-4-methylbenzene is combined with Methionine.	0.999817	TRUE	TRUE	Cardamom (FOOD00074), Common thyme (FOOD00183), Cumin (FOOD00067), Summer savory (FOOD00167), Dill (FOOD00013), Common oregano (FOOD00124), Turmeric (FOOD00068), Cornmint (FOOD00111), Pot marjoram (FOOD00123), Ginger (FOOD00206)
DB00134	Methionine	FDB017434	Xanthorrhizol	DDI type 26	The risk or severity of adverse effects can be increased when Methionine is combined with Xanthorrhizol.	0.999606	TRUE	TRUE	Ginger (FOOD00206)
DB00134	Methionine	FDB017434	Xanthorrhizol	DDI type 26	The risk or severity of adverse effects can be increased when Xanthorrhizol is combined with Methionine.	0.999585	TRUE	TRUE	Ginger (FOOD00206)
DB00134	Methionine	FDB017816	Dihydrocapsaicin	DDI type 26	The risk or severity of adverse effects can be increased when Dihydrocapsaicin is combined with Methionine.	0.999503	TRUE	TRUE	Green bell pepper (FOOD00877), Orange bell pepper (FOOD00879), Pepper (FOOD00040), Red bell pepper (FOOD00880), Yellow bell pepper (FOOD00878), Pepper (C. frutescens) (FOOD00428)
DB00134	Methionine	FDB019133	Linalyl acetate	DDI type 26	The risk or severity of adverse effects can be increased when Methionine is combined with Linalyl acetate.	0.999318	TRUE	TRUE	Cardamom (FOOD00074), Common sage (FOOD00165), Common thyme (FOOD00183), Cornmint (FOOD00111), Sweet basil (FOOD00119), Common oregano (FOOD00124), Rosemary (FOOD00159), Sweet marjoram (FOOD00122)
DB00134	Methionine	FDB019140	Pentosan polysulfate	DDI type 27	The risk or severity of bleeding can be increased when Pentosan polysulfate is combined with Methionine.	0.97095	TRUE	TRUE	Tamarind (FOOD00180), Fig (FOOD00081)
DB00134	Methionine	FDB019876	(±)-3-Octyl acetate	DDI type 26	The risk or severity of adverse effects can be increased when Methionine is combined with (±)-3-Octyl acetate.	0.964148	TRUE	TRUE	Orange mint (FOOD00110)
DB00134	Methionine	FDB019876	(±)-3-Octyl acetate	DDI type 26	The risk or severity of adverse effects can be increased when (±)-3-Octyl acetate is combined with Methionine.	0.999384	TRUE	TRUE	Orange mint (FOOD00110)
DB00134	Methionine	FDB019886	4-Ethyl-1,2-benzenediol	DDI type 26	The risk or severity of adverse effects can be increased when Methionine is combined with 4-Ethyl-1,2-benzenediol.	0.99739	TRUE	TRUE	Arabica coffee (FOOD00059), Coffee (FOOD00058), Robusta coffee (FOOD00060), Cocoa powder (FOOD00685), Beer (FOOD00268)
DB00134	Methionine	FDB019887	4-Ethyl-2-methoxyphenol	DDI type 26	The risk or severity of adverse effects can be increased when Methionine is combined with 4-Ethyl-2-methoxyphenol.	0.999931	TRUE	TRUE	Arabica coffee (FOOD00059), Coffee (FOOD00058), Robusta coffee (FOOD00060)
DB00134	Methionine	FDB019887	4-Ethyl-2-methoxyphenol	DDI type 26	The risk or severity of adverse effects can be increased when 4-Ethyl-2-methoxyphenol is combined with Methionine.	0.997021	TRUE	TRUE	Arabica coffee (FOOD00059), Coffee (FOOD00058), Robusta coffee (FOOD00060)
DB00134	Methionine	FDB019921	Ethyl hexanoate	DDI type 26	The risk or severity of adverse effects can be increased when Ethyl hexanoate is combined with Methionine.	0.999919	TRUE	TRUE	Passion fruit (FOOD00128), Pineapple (FOOD00012)
DB00134	Methionine	FDB020050	Pentyl formate	DDI type 26	The risk or severity of adverse effects can be increased when Methionine is combined with Pentyl formate.	0.989223	TRUE	TRUE	Milk (Cow) (FOOD00618)
DB00134	Methionine	FDB020050	Pentyl formate	DDI type 26	The risk or severity of adverse effects can be increased when Pentyl formate is combined with Methionine.	0.99995	TRUE	TRUE	Milk (Cow) (FOOD00618)
DB00134	Methionine	FDB020053	1,2,3-Trimethoxy-5-methylbenzene	DDI type 26	The risk or severity of adverse effects can be increased when 1,2,3-Trimethoxy-5-methylbenzene is combined with Methionine.	0.991767	TRUE	TRUE	Safflower (FOOD00042)
DB00134	Methionine	FDB020161	2-Phenylethyl formate	DDI type 26	The risk or severity of adverse effects can be increased when Methionine is combined with 2-Phenylethyl formate.	0.999942	TRUE	TRUE	Bilberry (FOOD00193)
DB00134	Methionine	FDB020161	2-Phenylethyl formate	DDI type 26	The risk or severity of adverse effects can be increased when 2-Phenylethyl formate is combined with Methionine.	0.999869	TRUE	TRUE	Bilberry (FOOD00193)
DB00134	Methionine	FDB020783	Capsiamide	DDI type 26	The risk or severity of adverse effects can be increased when Methionine is combined with Capsiamide.	0.999568	TRUE	TRUE	Green bell pepper (FOOD00877), Orange bell pepper (FOOD00879), Pepper (FOOD00040), Red bell pepper (FOOD00880), Yellow bell pepper (FOOD00878), Pepper (C. frutescens) (FOOD00428)
DB00134	Methionine	FDB020783	Capsiamide	DDI type 26	The risk or severity of adverse effects can be increased when Capsiamide is combined with Methionine.	0.999885	TRUE	TRUE	Green bell pepper (FOOD00877), Orange bell pepper (FOOD00879), Pepper (FOOD00040), Red bell pepper (FOOD00880), Yellow bell pepper (FOOD00878), Pepper (C. frutescens) (FOOD00428)
DB00134	Methionine	FDB020924	Alliofuroside A	DDI type 10	The serum concentration of Alliofuroside A can be increased when it is combined with Methionine.	0.952673	FALSE	FALSE	Garden onion (FOOD00006)
DB00134	Methionine	FDB021586	Vitamin D	DDI type 26	The risk or severity of adverse effects can be increased when Methionine is combined with Vitamin D.	0.999506	TRUE	TRUE	Haddock (FOOD00374), Gadus (Common cod) (FOOD00515), Maitake (FOOD00555), Common carp (FOOD00322), Lake trout (FOOD00582), Anguilliformes (FOOD00577), Rainbow trout (FOOD00444), Atlantic mackerel (FOOD00293), Salmonidae (Salmon, Trout) (FOOD00493), Swordfish (FOOD00487)
DB00134	Methionine	FDB021621	C18:1, n-9	DDI type 26	The risk or severity of adverse effects can be increased when Methionine is combined with C18:1, n-9.	0.998059	TRUE	TRUE	Rape (FOOD00029), Olive (FOOD00121), Safflower (FOOD00042), Pecan nut (FOOD00044), Other animal fat (FOOD00682), Lard (FOOD00681), Hazelnut (FOOD00376), Tallow (FOOD00674), Cocoa butter (FOOD00684), Peanut (FOOD00016)
DB00134	Methionine	FDB021621	C18:1, n-9	DDI type 26	The risk or severity of adverse effects can be increased when C18:1, n-9 is combined with Methionine.	0.999884	TRUE	TRUE	Rape (FOOD00029), Olive (FOOD00121), Safflower (FOOD00042), Pecan nut (FOOD00044), Other animal fat (FOOD00682), Lard (FOOD00681), Hazelnut (FOOD00376), Tallow (FOOD00674), Cocoa butter (FOOD00684), Peanut (FOOD00016)
DB00134	Methionine	FDB021782	25-Hydroxycholecalciferol	DDI type 26	The risk or severity of adverse effects can be increased when Methionine is combined with 25-Hydroxycholecalciferol.	0.999691	TRUE	TRUE	Sausage (FOOD00652), Other animal fat (FOOD00682), Domestic pig (FOOD00536), Milk (Cow) (FOOD00618)
DB00134	Methionine	FDB021793	24,25-Dihydroxyvitamin D3	DDI type 26	The risk or severity of adverse effects can be increased when Methionine is combined with 24,25-Dihydroxyvitamin D3.	0.999527	TRUE	TRUE	Haddock (FOOD00374), Gadus (Common cod) (FOOD00515), Salmonidae (Salmon, Trout) (FOOD00493), Lake trout (FOOD00582), Anguilliformes (FOOD00577), Atlantic halibut (FOOD00516), Charr (FOOD00571), Greenland halibut/turbot (FOOD00370), Rainbow trout (FOOD00444), Clupeinae (Herring, Sardine, Sprat) (FOOD00520)
DB00134	Methionine	FDB021812	Aminoadipic acid	DDI type 26	The risk or severity of adverse effects can be increased when Aminoadipic acid is combined with Methionine.	0.99962	TRUE	TRUE	Rye (FOOD00169), Wheat (FOOD00561), Broccoli (FOOD00034), Dill (FOOD00013), Sunburst squash (pattypan squash) (FOOD00874), Swiss chard (FOOD00237), Yellow wax bean (FOOD00882), Green zucchini (FOOD00875), Potato (FOOD00175), Green bean (FOOD00883)
DB00134	Methionine	FDB022621	25-Hydroxyvitamin D2	DDI type 26	The risk or severity of adverse effects can be increased when Methionine is combined with 25-Hydroxyvitamin D2.	0.991161	TRUE	TRUE	Milk (Cow) (FOOD00618)
DB00134	Methionine	FDB023414	Vernolic acid	DDI type 26	The risk or severity of adverse effects can be increased when Methionine is combined with Vernolic acid.	0.99398	TRUE	TRUE	Rice (FOOD00125)
DB00134	Methionine	FDB023414	Vernolic acid	DDI type 26	The risk or severity of adverse effects can be increased when Vernolic acid is combined with Methionine.	0.99998	TRUE	TRUE	Rice (FOOD00125)
DB00134	Methionine	FDB023868	Linoelaidic acid	DDI type 26	The risk or severity of adverse effects can be increased when Methionine is combined with Linoelaidic acid.	0.982791	TRUE	TRUE	Red bell pepper (FOOD00880), Green bell pepper (FOOD00877), Green zucchini (FOOD00875)
DB00137	Lutein	FDB000446	L-Tyrosine	DDI type 26	The risk or severity of adverse effects can be increased when L-Tyrosine is combined with Lutein.	0.99968	TRUE	TRUE	Milk (Cow) (FOOD00618), Casein (FOOD00659), Other soy product (FOOD00271), Beluga whale (FOOD00300), Red bell pepper (FOOD00880), Buttermilk (FOOD00692), Smelt (FOOD00519), Soy bean (FOOD00085), Spirulina (FOOD00480), Dried milk (FOOD00689)
DB00137	Lutein	FDB000474	L-Lysine	DDI type 26	The risk or severity of adverse effects can be increased when Lutein is combined with L-Lysine.	0.986555	TRUE	TRUE	Milk (Cow) (FOOD00618), Beluga whale (FOOD00300), Red bell pepper (FOOD00880), Casein (FOOD00659), Bearded seal (FOOD00466), Gelatin (FOOD00663), Smelt (FOOD00519), Gelatin dessert (FOOD00725), Other soy product (FOOD00271), Whitefish (FOOD00503)
DB00137	Lutein	FDB000558	Alliin	DDI type 26	The risk or severity of adverse effects can be increased when Alliin is combined with Lutein.	0.967933	TRUE	TRUE	Soft-necked garlic (FOOD00850)
DB00137	Lutein	FDB000567	L-DOPA	DDI type 26	The risk or severity of adverse effects can be increased when L-DOPA is combined with Lutein.	0.986449	TRUE	TRUE	Broad bean (FOOD00197), Swiss chard (FOOD00237), Yellow wax bean (FOOD00882), Spinach (FOOD00178), Green bean (FOOD00883), Red beetroot (FOOD00264), Broccoli (FOOD00034), Dill (FOOD00013), Orange bell pepper (FOOD00879), Yellow zucchini (FOOD00876)
DB00137	Lutein	FDB000753	Ethanol	DDI type 26	The risk or severity of adverse effects can be increased when Ethanol is combined with Lutein.	0.984547	TRUE	TRUE	Gin (FOOD00625), Other alcoholic beverage (FOOD00278), Rum (FOOD00629), Vodka (FOOD00622), Spirit (FOOD00276), Whisky (FOOD00623), Liquor (FOOD00616), Madeira wine (FOOD00633), Vanilla (FOOD00195), Sake (FOOD00738)
DB00137	Lutein	FDB000765	Hexane	DDI type 26	The risk or severity of adverse effects can be increased when Hexane is combined with Lutein.	0.952298	TRUE	TRUE	Kohlrabi (FOOD00033)
DB00137	Lutein	FDB000768	Pentane	DDI type 26	The risk or severity of adverse effects can be increased when Pentane is combined with Lutein.	0.998762	TRUE	TRUE	Kohlrabi (FOOD00033)
DB00137	Lutein	FDB000845	2,6-Dihydroxybenzoic acid	DDI type 27	The risk or severity of bleeding can be increased when Lutein is combined with 2,6-Dihydroxybenzoic acid.	0.944722	TRUE	TRUE	Beer (FOOD00268), Olive (FOOD00121)
DB00137	Lutein	FDB000849	Phloretic acid	DDI type 26	The risk or severity of adverse effects can be increased when Phloretic acid is combined with Lutein.	0.950152	TRUE	TRUE	Olive (FOOD00121)
DB00137	Lutein	FDB001014	Nicotinic acid	DDI type 26	The risk or severity of adverse effects can be increased when Nicotinic acid is combined with Lutein.	0.998398	TRUE	TRUE	Leavening agent (FOOD00661), Yellowfin tuna (FOOD00511), Skipjack tuna (FOOD00476), Meat bouillon (FOOD00657), Hedge mustard (FOOD00475), European anchovy (FOOD00362), Mexican groundcherry (FOOD00491), Peanut (FOOD00016), Mugwort (FOOD00020), Sockeye salmon (FOOD00453)
DB00137	Lutein	FDB001022	Ethyl hexadecanoate	DDI type 26	The risk or severity of adverse effects can be increased when Ethyl hexadecanoate is combined with Lutein.	0.999752	TRUE	TRUE	Coriander (FOOD00061)
DB00137	Lutein	FDB001037	4-Aminobenzoic acid	DDI type 27	The risk or severity of bleeding can be increased when Lutein is combined with 4-Aminobenzoic acid.	0.995918	TRUE	TRUE	Pineapple (FOOD00012)
DB00137	Lutein	FDB001202	D-Mannose	DDI type 13	The therapeutic efficacy of D-Mannose can be decreased when used in combination with Lutein.	0.972379	FALSE	FALSE	Corn (FOOD00205)
DB00137	Lutein	FDB001304	alpha1-Sitosterol	DDI type 26	The risk or severity of adverse effects can be increased when alpha1-Sitosterol is combined with Lutein.	0.998778	TRUE	TRUE	Evening primrose (FOOD00120)
DB00137	Lutein	FDB001353	Uttronin A	DDI type 10	The serum concentration of Uttronin A can be increased when it is combined with Lutein.	0.952801	FALSE	FALSE	Soft-necked garlic (FOOD00850)
DB00137	Lutein	FDB001361	Ostreasterol	DDI type 46	Ostreasterol may increase the anticoagulant activities of Lutein.	0.997971	TRUE	FALSE	Common walnut (FOOD00094)
DB00137	Lutein	FDB001361	Ostreasterol	DDI type 26	The risk or severity of adverse effects can be increased when Ostreasterol is combined with Lutein.	0.994062	TRUE	TRUE	Common walnut (FOOD00094)
DB00137	Lutein	FDB001850	Stigmast-7-en-3-ol	DDI type 26	The risk or severity of adverse effects can be increased when Stigmast-7-en-3-ol is combined with Lutein.	0.967063	TRUE	TRUE	Common walnut (FOOD00094)
DB00137	Lutein	FDB001936	Stigmasterol	DDI type 46	Stigmasterol may increase the anticoagulant activities of Lutein.	0.996452	TRUE	FALSE	Cherimoya (FOOD00326), Soy bean (FOOD00085), Shortening (FOOD00783), Margarine (FOOD00843), Chocolate (FOOD00687), Flaxseed (FOOD00101), Mung bean (FOOD00200), Sesame (FOOD00170), Turmeric (FOOD00068), Sunflower (FOOD00086)
DB00137	Lutein	FDB001936	Stigmasterol	DDI type 26	The risk or severity of adverse effects can be increased when Stigmasterol is combined with Lutein.	0.984086	TRUE	TRUE	Cherimoya (FOOD00326), Soy bean (FOOD00085), Shortening (FOOD00783), Margarine (FOOD00843), Chocolate (FOOD00687), Flaxseed (FOOD00101), Mung bean (FOOD00200), Sesame (FOOD00170), Turmeric (FOOD00068), Sunflower (FOOD00086)
DB00137	Lutein	FDB002119	6-Propyltridecane	DDI type 26	The risk or severity of adverse effects can be increased when 6-Propyltridecane is combined with Lutein.	0.9994	TRUE	TRUE	Black walnut (FOOD00093)
DB00137	Lutein	FDB002412	Tangeritin	DDI type 26	The risk or severity of adverse effects can be increased when Tangeritin is combined with Lutein.	0.996925	TRUE	TRUE	Sweet orange (FOOD00057)
DB00137	Lutein	FDB002465	Tetramethylscutellarein	DDI type 26	The risk or severity of adverse effects can be increased when Tetramethylscutellarein is combined with Lutein.	0.999231	TRUE	TRUE	Sweet orange (FOOD00057)
DB00137	Lutein	FDB002951	Elaidic acid	DDI type 26	The risk or severity of adverse effects can be increased when Elaidic acid is combined with Lutein.	0.999637	TRUE	TRUE	Pomegranate (FOOD00151), Milk (Cow) (FOOD00618)
DB00137	Lutein	FDB002952	Vaccenic acid	DDI type 26	The risk or severity of adverse effects can be increased when Vaccenic acid is combined with Lutein.	0.999637	TRUE	TRUE	Other animal fat (FOOD00682), Margarine (FOOD00843), Scombridae (Bonito, Mackerel, Tuna) (FOOD00586), Cattle (Beef, Veal) (FOOD00495), Domestic pig (FOOD00536), Other dish (FOOD00836), Sturgeon (FOOD00570), Clupeinae (Herring, Sardine, Sprat) (FOOD00520), Rainbow trout (FOOD00444), Milk (Cow) (FOOD00618)
DB00137	Lutein	FDB003051	Cetyl alcohol	DDI type 26	The risk or severity of adverse effects can be increased when Cetyl alcohol is combined with Lutein.	0.994848	TRUE	TRUE	Kohlrabi (FOOD00033)
DB00137	Lutein	FDB003107	Coronaric acid	DDI type 26	The risk or severity of adverse effects can be increased when Coronaric acid is combined with Lutein.	0.999705	TRUE	TRUE	Rice (FOOD00125)
DB00137	Lutein	FDB003175	1-Pentanesulfenothioic acid	DDI type 26	The risk or severity of adverse effects can be increased when 1-Pentanesulfenothioic acid is combined with Lutein.	0.999857	TRUE	TRUE	Chives (FOOD00009)
DB00137	Lutein	FDB003598	17alpha-ethynylestradiol	DDI type 34	17alpha-ethynylestradiol may decrease the anticoagulant activities of Lutein.	0.999106	TRUE	FALSE	Cloves (FOOD00179), Cardamom (FOOD00074), Ginkgo nuts (FOOD00367), Nutmeg (FOOD00118), Star anise (FOOD00090), Ginger (FOOD00206), Ceylon cinnamon (FOOD00051), Cumin (FOOD00067), Pot marjoram (FOOD00123), Anise (FOOD00137)
DB00137	Lutein	FDB003598	17alpha-ethynylestradiol	DDI type 26	The risk or severity of adverse effects can be increased when 17alpha-ethynylestradiol is combined with Lutein.	0.99988	TRUE	TRUE	Cloves (FOOD00179), Cardamom (FOOD00074), Ginkgo nuts (FOOD00367), Nutmeg (FOOD00118), Star anise (FOOD00090), Ginger (FOOD00206), Ceylon cinnamon (FOOD00051), Cumin (FOOD00067), Pot marjoram (FOOD00123), Anise (FOOD00137)
DB00137	Lutein	FDB003654	Ornithine	DDI type 26	The risk or severity of adverse effects can be increased when Lutein is combined with Ornithine.	0.997152	TRUE	TRUE	Green zucchini (FOOD00875), Potato (FOOD00175), Garden onion (FOOD00006), Broccoli (FOOD00034), Sunburst squash (pattypan squash) (FOOD00874), Spinach (FOOD00178), Cucumber (FOOD00065), Yellow bell pepper (FOOD00878), Green bell pepper (FOOD00877), Orange bell pepper (FOOD00879)
DB00137	Lutein	FDB003668	Prostaglandin A-1	DDI type 26	The risk or severity of adverse effects can be increased when Prostaglandin A-1 is combined with Lutein.	0.989738	TRUE	TRUE	Garden onion (FOOD00006)
DB00137	Lutein	FDB003685	S-Allylmercaptocysteine	DDI type 26	The risk or severity of adverse effects can be increased when S-Allylmercaptocysteine is combined with Lutein.	0.959893	TRUE	TRUE	Soft-necked garlic (FOOD00850)
DB00137	Lutein	FDB003771	Gadoleic acid	DDI type 26	The risk or severity of adverse effects can be increased when Gadoleic acid is combined with Lutein.	0.999866	TRUE	TRUE	Fish oil (FOOD00990), Other fish product (FOOD00665), Lumpsucker (FOOD00585), White mustard (FOOD00413), Greenland halibut/turbot (FOOD00370), Scombridae (Bonito, Mackerel, Tuna) (FOOD00586), Gadus (Common cod) (FOOD00515), Anguilliformes (FOOD00577), Rape (FOOD00029), Colorado pinyon (FOOD00433)
DB00137	Lutein	FDB003797	Esters	DDI type 46	Esters may increase the anticoagulant activities of Lutein.	0.999519	TRUE	FALSE	Pineapple (FOOD00012)
DB00137	Lutein	FDB003938	Flavonoids	DDI type 13	The therapeutic efficacy of Flavonoids can be decreased when used in combination with Lutein.	0.950344	FALSE	FALSE	Common grape (FOOD00204), Passion fruit (FOOD00128), Fig (FOOD00081), Blackcurrant (FOOD00155), Rose hip (FOOD00446), Turmeric (FOOD00068)
DB00137	Lutein	FDB003938	Flavonoids	DDI type 27	The risk or severity of bleeding can be increased when Flavonoids is combined with Lutein.	0.996557	TRUE	TRUE	Common grape (FOOD00204), Passion fruit (FOOD00128), Fig (FOOD00081), Blackcurrant (FOOD00155), Rose hip (FOOD00446), Turmeric (FOOD00068)
DB00137	Lutein	FDB003965	N-Pentyl benzene	DDI type 26	The risk or severity of adverse effects can be increased when N-Pentyl benzene is combined with Lutein.	0.961434	TRUE	TRUE	Wild celery (FOOD00015)
DB00137	Lutein	FDB004105	1-Heptadecene	DDI type 26	The risk or severity of adverse effects can be increased when 1-Heptadecene is combined with Lutein.	0.999255	TRUE	TRUE	Safflower (FOOD00042)
DB00137	Lutein	FDB004212	delta-5-Avenasterol	DDI type 46	delta-5-Avenasterol may increase the anticoagulant activities of Lutein.	0.998986	TRUE	FALSE	Common walnut (FOOD00094)
DB00137	Lutein	FDB004212	delta-5-Avenasterol	DDI type 26	The risk or severity of adverse effects can be increased when delta-5-Avenasterol is combined with Lutein.	0.991548	TRUE	TRUE	Common walnut (FOOD00094)
DB00137	Lutein	FDB004234	Melatonin	DDI type 26	The risk or severity of adverse effects can be increased when Melatonin is combined with Lutein.	0.999552	TRUE	TRUE	Corn (FOOD00205)
DB00137	Lutein	FDB004514	2-Hexanol	DDI type 26	The risk or severity of adverse effects can be increased when 2-Hexanol is combined with Lutein.	0.995672	TRUE	TRUE	Safflower (FOOD00042)
DB00137	Lutein	FDB004676	Heptadecanoic acid	DDI type 26	The risk or severity of adverse effects can be increased when Heptadecanoic acid is combined with Lutein.	0.99965	TRUE	TRUE	Cinnamon (FOOD00572), Cattle (Beef, Veal) (FOOD00495), Sturgeon (FOOD00570), Crab (FOOD00573), Sausage (FOOD00652), Rabbit (FOOD00528), Cashew nut (FOOD00011), Oyster mushroom (FOOD00553), Clawed lobster (FOOD00584), Atlantic halibut (FOOD00516)
DB00137	Lutein	FDB004683	Obtusifoliol	DDI type 26	The risk or severity of adverse effects can be increased when Obtusifoliol is combined with Lutein.	0.999023	TRUE	TRUE	Evening primrose (FOOD00120)
DB00137	Lutein	FDB004727	N-Eicosane	DDI type 26	The risk or severity of adverse effects can be increased when N-Eicosane is combined with Lutein.	0.999803	TRUE	TRUE	Lemon balm (FOOD00108)
DB00137	Lutein	FDB004728	N-Heneicosane	DDI type 26	The risk or severity of adverse effects can be increased when N-Heneicosane is combined with Lutein.	0.999647	TRUE	TRUE	Black elderberry (FOOD00166), Common oregano (FOOD00124), Lemon balm (FOOD00108)
DB00137	Lutein	FDB004731	N-Tetradecane	DDI type 26	The risk or severity of adverse effects can be increased when N-Tetradecane is combined with Lutein.	0.998919	TRUE	TRUE	Black walnut (FOOD00093)
DB00137	Lutein	FDB005197	Ethyl pentadecanoate	DDI type 26	The risk or severity of adverse effects can be increased when Ethyl pentadecanoate is combined with Lutein.	0.999334	TRUE	TRUE	Coriander (FOOD00061)
DB00137	Lutein	FDB005827	3-Methyltridecane	DDI type 26	The risk or severity of adverse effects can be increased when 3-Methyltridecane is combined with Lutein.	0.99886	TRUE	TRUE	Black walnut (FOOD00093)
DB00137	Lutein	FDB006916	alpha-Fenchyl acetate	DDI type 26	The risk or severity of adverse effects can be increased when alpha-Fenchyl acetate is combined with Lutein.	0.998478	TRUE	TRUE	Rosemary (FOOD00159)
DB00137	Lutein	FDB007498	Diethylstilbesterol	DDI type 34	Diethylstilbesterol may decrease the anticoagulant activities of Lutein.	0.999173	TRUE	FALSE	Gram bean (FOOD00199)
DB00137	Lutein	FDB007640	6,10,14-Trimethylpentadecan-2-one	DDI type 26	The risk or severity of adverse effects can be increased when 6,10,14-Trimethylpentadecan-2-one is combined with Lutein.	0.999941	TRUE	TRUE	Common oregano (FOOD00124)
DB00137	Lutein	FDB007788	cis-[6]-Shogaol	DDI type 6	The metabolism of Lutein can be decreased when combined with cis-[6]-Shogaol.	0.997315	TRUE	FALSE	Ginger (FOOD00206)
DB00137	Lutein	FDB008051	Heptanoic acid	DDI type 26	The risk or severity of adverse effects can be increased when Heptanoic acid is combined with Lutein.	0.997391	TRUE	TRUE	Butter (FOOD00648), Tofu (FOOD00696), Cinnamon (FOOD00572), Smelt (FOOD00519), Chinese cinnamon (FOOD00050), Bearded seal (FOOD00466), Cattle (Beef, Veal) (FOOD00495), Macadamia nut (FOOD00525), Margarine-like spread (FOOD00844), Shortening (FOOD00783)
DB00137	Lutein	FDB008068	Hexanal	DDI type 26	The risk or severity of adverse effects can be increased when Hexanal is combined with Lutein.	0.998841	TRUE	TRUE	Corn (FOOD00205), Black walnut (FOOD00093), Black tea (FOOD00907), Green tea (FOOD00908), Herbal tea (FOOD00989), Red tea (FOOD00925), Tea (FOOD00038), Milk (Cow) (FOOD00618), Orange mint (FOOD00110), Common oregano (FOOD00124)
DB00137	Lutein	FDB008072	1-Hexanol	DDI type 26	The risk or severity of adverse effects can be increased when 1-Hexanol is combined with Lutein.	0.984931	TRUE	TRUE	Corn (FOOD00205), Black walnut (FOOD00093), Lovage (FOOD00100), Hyssop (FOOD00089), Milk (Cow) (FOOD00618), Safflower (FOOD00042), Soft-necked garlic (FOOD00850), Parsley (FOOD00131), Sweet orange (FOOD00057), Bilberry (FOOD00193)
DB00137	Lutein	FDB008073	3-Hexanol	DDI type 26	The risk or severity of adverse effects can be increased when 3-Hexanol is combined with Lutein.	0.995844	TRUE	TRUE	Safflower (FOOD00042)
DB00137	Lutein	FDB008230	1-Pentanol	DDI type 26	The risk or severity of adverse effects can be increased when 1-Pentanol is combined with Lutein.	0.997858	TRUE	TRUE	Black walnut (FOOD00093), Common thyme (FOOD00183), Black tea (FOOD00907), Green tea (FOOD00908), Herbal tea (FOOD00989), Red tea (FOOD00925), Tea (FOOD00038), Milk (Cow) (FOOD00618), Safflower (FOOD00042), Bilberry (FOOD00193)
DB00137	Lutein	FDB008492	Cuminyl alcohol	DDI type 26	The risk or severity of adverse effects can be increased when Cuminyl alcohol is combined with Lutein.	0.940767	TRUE	TRUE	Cumin (FOOD00067), Peppermint (FOOD00113)
DB00137	Lutein	FDB009029	Bornyl acetate	DDI type 26	The risk or severity of adverse effects can be increased when Bornyl acetate is combined with Lutein.	0.99857	TRUE	TRUE	Rosemary (FOOD00159), Common sage (FOOD00165), Sweet basil (FOOD00119), Common thyme (FOOD00183), Spearmint (FOOD00112), Ginger (FOOD00206), Cumin (FOOD00067), Carrot (FOOD00245), Wild carrot (FOOD00072), Ceylon cinnamon (FOOD00051)
DB00137	Lutein	FDB009636	Isoborneol	DDI type 26	The risk or severity of adverse effects can be increased when Isoborneol is combined with Lutein.	0.972943	TRUE	TRUE	Common sage (FOOD00165), Turmeric (FOOD00068), Rosemary (FOOD00159), Common oregano (FOOD00124)
DB00137	Lutein	FDB010039	Pentylamine	DDI type 26	The risk or severity of adverse effects can be increased when Pentylamine is combined with Lutein.	0.984543	TRUE	TRUE	Green bell pepper (FOOD00877), Orange bell pepper (FOOD00879), Pepper (FOOD00040), Red bell pepper (FOOD00880), Yellow bell pepper (FOOD00878), Cabbage (FOOD00851), White cabbage (FOOD00887), Apple (FOOD00105)
DB00137	Lutein	FDB010420	Fenchyl acetate	DDI type 26	The risk or severity of adverse effects can be increased when Fenchyl acetate is combined with Lutein.	0.998478	TRUE	TRUE	Sweet basil (FOOD00119)
DB00137	Lutein	FDB010583	Octopamine	DDI type 26	The risk or severity of adverse effects can be increased when Octopamine is combined with Lutein.	0.967428	TRUE	TRUE	Mandarin orange (Clementine, Tangerine) (FOOD00056), Sweet orange (FOOD00057)
DB00137	Lutein	FDB010838	1-Methylnaphthalene	DDI type 13	The therapeutic efficacy of Lutein can be decreased when used in combination with 1-Methylnaphthalene.	0.955951	TRUE	FALSE	Black walnut (FOOD00093)
DB00137	Lutein	FDB011417	3-Phenylpropyl acetate	DDI type 26	The risk or severity of adverse effects can be increased when 3-Phenylpropyl acetate is combined with Lutein.	0.978414	TRUE	TRUE	Ceylon cinnamon (FOOD00051)
DB00137	Lutein	FDB011546	24-Methylenelophenol	DDI type 26	The risk or severity of adverse effects can be increased when 24-Methylenelophenol is combined with Lutein.	0.99821	TRUE	TRUE	Evening primrose (FOOD00120)
DB00137	Lutein	FDB011703	(S)-[8]-Gingerol	DDI type 26	The risk or severity of adverse effects can be increased when Lutein is combined with (S)-[8]-Gingerol.	0.959718	TRUE	TRUE	Ginger (FOOD00206)
DB00137	Lutein	FDB011861	[6]-Shogaol	DDI type 6	The metabolism of Lutein can be decreased when combined with [6]-Shogaol.	0.997315	TRUE	FALSE	Ginger (FOOD00206)
DB00137	Lutein	FDB011952	Hexadecane	DDI type 26	The risk or severity of adverse effects can be increased when Hexadecane is combined with Lutein.	0.999291	TRUE	TRUE	Black walnut (FOOD00093)
DB00137	Lutein	FDB012060	3,4-Dihydroxybenzaldehyde	DDI type 27	The risk or severity of bleeding can be increased when Lutein is combined with 3,4-Dihydroxybenzaldehyde.	0.987497	TRUE	TRUE	Vinegar (FOOD00628), Grape wine (FOOD00612)
DB00137	Lutein	FDB012122	Cholestanol	DDI type 46	Cholestanol may increase the anticoagulant activities of Lutein.	0.999881	TRUE	FALSE	Common walnut (FOOD00094)
DB00137	Lutein	FDB012362	beta-Sitosterol	DDI type 46	beta-Sitosterol may increase the anticoagulant activities of Lutein.	0.999886	TRUE	FALSE	Cherimoya (FOOD00326), Canola (FOOD00772), Margarine (FOOD00843), Sesame (FOOD00170), Flaxseed (FOOD00101), Pistachio (FOOD00140), Common buckwheat (FOOD00079), Evening primrose (FOOD00120), Sunflower (FOOD00086), Shortening (FOOD00783)
DB00137	Lutein	FDB012435	Ethyl tetradecanoate	DDI type 26	The risk or severity of adverse effects can be increased when Ethyl tetradecanoate is combined with Lutein.	0.998598	TRUE	TRUE	Coriander (FOOD00061)
DB00137	Lutein	FDB012441	Ethyl stearate	DDI type 26	The risk or severity of adverse effects can be increased when Ethyl stearate is combined with Lutein.	0.999931	TRUE	TRUE	Coriander (FOOD00061)
DB00137	Lutein	FDB012445	(±)-Isobornyl acetate	DDI type 26	The risk or severity of adverse effects can be increased when (±)-Isobornyl acetate is combined with Lutein.	0.99857	TRUE	TRUE	Spearmint (FOOD00112)
DB00137	Lutein	FDB012485	Nicotinamide	DDI type 6	The metabolism of Lutein can be decreased when combined with Nicotinamide.	0.997113	TRUE	FALSE	Common sage (FOOD00165), Cocoa bean (FOOD00182), Common pea (FOOD00141)
DB00137	Lutein	FDB012485	Nicotinamide	DDI type 26	The risk or severity of adverse effects can be increased when Nicotinamide is combined with Lutein.	0.995305	TRUE	TRUE	Common sage (FOOD00165), Cocoa bean (FOOD00182), Common pea (FOOD00141)
DB00137	Lutein	FDB012494	Clerosterol	DDI type 46	Clerosterol may increase the anticoagulant activities of Lutein.	0.999209	TRUE	FALSE	Common walnut (FOOD00094)
DB00137	Lutein	FDB012494	Clerosterol	DDI type 26	The risk or severity of adverse effects can be increased when Clerosterol is combined with Lutein.	0.986278	TRUE	TRUE	Common walnut (FOOD00094)
DB00137	Lutein	FDB012496	Brassicasterol	DDI type 46	Brassicasterol may increase the anticoagulant activities of Lutein.	0.993589	TRUE	FALSE	Common walnut (FOOD00094)
DB00137	Lutein	FDB012496	Brassicasterol	DDI type 26	The risk or severity of adverse effects can be increased when Brassicasterol is combined with Lutein.	0.983864	TRUE	TRUE	Common walnut (FOOD00094)
DB00137	Lutein	FDB012521	Campesterol	DDI type 46	Campesterol may increase the anticoagulant activities of Lutein.	0.999892	TRUE	FALSE	Canola (FOOD00772), Cherimoya (FOOD00326), Flaxseed (FOOD00101), Margarine (FOOD00843), Soy bean (FOOD00085), Sesame (FOOD00170), Shortening (FOOD00783), Opium poppy (FOOD00438), Common buckwheat (FOOD00079), Sunflower (FOOD00086)
DB00137	Lutein	FDB012530	D-Glucose	DDI type 13	The therapeutic efficacy of D-Glucose can be decreased when used in combination with Lutein.	0.972379	FALSE	FALSE	Honey (FOOD00626), Common grape (FOOD00204), Date (FOOD00135), Molasses (FOOD00786), Ketchup (FOOD00756), Marshmallow (FOOD00662), Jackfruit (FOOD00384), Mamey sapote (FOOD00459), Liquorice (FOOD00627), Muskmelon (FOOD00064)
DB00137	Lutein	FDB012535	L-Glutamic acid	DDI type 26	The risk or severity of adverse effects can be increased when L-Glutamic acid is combined with Lutein.	0.996177	TRUE	TRUE	Casein (FOOD00659), Other soy product (FOOD00271), Beluga whale (FOOD00300), Gelatin (FOOD00663), Soy bean (FOOD00085), Gelatin dessert (FOOD00725), Meat bouillon (FOOD00657), Cottonseed (FOOD00341), Buttermilk (FOOD00692), Bearded seal (FOOD00466)
DB00137	Lutein	FDB012536	Glutamic acid	DDI type 26	The risk or severity of adverse effects can be increased when Glutamic acid is combined with Lutein.	0.996177	TRUE	TRUE	Red bell pepper (FOOD00880), Milk (Cow) (FOOD00618), Wheat (FOOD00561), Oat (FOOD00022), Rye (FOOD00169), Barley (FOOD00088), Swiss chard (FOOD00237), Red beetroot (FOOD00264), Dill (FOOD00013), White cabbage (FOOD00887)
DB00137	Lutein	FDB012569	Gondoic acid	DDI type 26	The risk or severity of adverse effects can be increased when Gondoic acid is combined with Lutein.	0.999866	TRUE	TRUE	Macadamia nut (FOOD00525)
DB00137	Lutein	FDB012612	Ergosterol	DDI type 26	The risk or severity of adverse effects can be increased when Ergosterol is combined with Lutein.	0.998537	TRUE	TRUE	Common wheat (FOOD00187)
DB00137	Lutein	FDB012660	Secoisolariciresinol	DDI type 27	The risk or severity of bleeding can be increased when Lutein is combined with Secoisolariciresinol.	0.999041	TRUE	TRUE	Flaxseed (FOOD00101), Rye bread (FOOD00809), Asparagus (FOOD00021), Common buckwheat (FOOD00079), Kiwi (FOOD00004), Sesame (FOOD00170), Sunflower (FOOD00086), Soy bean (FOOD00085), Rye (FOOD00169), Black tea (FOOD00907)
DB00137	Lutein	FDB012696	Dolichosterone	DDI type 26	The risk or severity of adverse effects can be increased when Dolichosterone is combined with Lutein.	0.998915	TRUE	TRUE	Rice (FOOD00125)
DB00137	Lutein	FDB012732	Vitamin D3	DDI type 26	The risk or severity of adverse effects can be increased when Vitamin D3 is combined with Lutein.	0.987557	TRUE	TRUE	Common carp (FOOD00322), Lake trout (FOOD00582), Chinook salmon (FOOD00454), Atlantic mackerel (FOOD00293), Swordfish (FOOD00487), Cisco (FOOD00334), Greater sturgeon (FOOD00483), Sockeye salmon (FOOD00453), Rainbow trout (FOOD00444), Pink salmon (FOOD00450)
DB00137	Lutein	FDB012733	delta7-Avenasterol	DDI type 26	The risk or severity of adverse effects can be increased when delta7-Avenasterol is combined with Lutein.	0.996206	TRUE	TRUE	Common walnut (FOOD00094)
DB00137	Lutein	FDB012765	Petroselinic acid	DDI type 26	The risk or severity of adverse effects can be increased when Petroselinic acid is combined with Lutein.	0.999637	TRUE	TRUE	Parsley (FOOD00131), Carrot (FOOD00245), Wild carrot (FOOD00072), Anise (FOOD00137), Parsnip (FOOD00129), Coriander (FOOD00061), Chervil (FOOD00327), Caraway (FOOD00043)
DB00137	Lutein	FDB012798	Estrone	DDI type 26	The risk or severity of adverse effects can be increased when Estrone is combined with Lutein.	0.997989	TRUE	TRUE	Pomegranate (FOOD00151), Apple (FOOD00105)
DB00137	Lutein	FDB012811	Ergocalciferol	DDI type 26	The risk or severity of adverse effects can be increased when Ergocalciferol is combined with Lutein.	0.997955	TRUE	TRUE	Maitake (FOOD00555), Morchella (Morel) (FOOD00731), Shiitake (FOOD00548), Other beverage (FOOD00667), Enokitake (FOOD00551), Milk (Cow) (FOOD00618)
DB00137	Lutein	FDB012844	Benzyl benzoate	DDI type 26	The risk or severity of adverse effects can be increased when Lutein is combined with Benzyl benzoate.	0.998836	TRUE	TRUE	Ceylon cinnamon (FOOD00051)
DB00137	Lutein	FDB012858	Oleic acid	DDI type 26	The risk or severity of adverse effects can be increased when Oleic acid is combined with Lutein.	0.999637	TRUE	TRUE	Rape (FOOD00029), Common hazelnut (FOOD00062), Macadamia nut (FOOD00525), Pecan nut (FOOD00044), Other animal fat (FOOD00682), Lard (FOOD00681), Hazelnut (FOOD00376), Tallow (FOOD00674), Safflower (FOOD00042), Cocoa butter (FOOD00684)
DB00137	Lutein	FDB012887	epsilon-Polylysine	DDI type 26	The risk or severity of adverse effects can be increased when Lutein is combined with epsilon-Polylysine.	0.986555	TRUE	TRUE	Casein (FOOD00659), Gelatin (FOOD00663), Dried milk (FOOD00689), Thunnus (FOOD00607), Rabbit (FOOD00528), Atlantic halibut (FOOD00516), Garfish (FOOD00579), Cheese (FOOD00617), Shrimp (FOOD00533), Anguilliformes (FOOD00577)
DB00137	Lutein	FDB012991	Pristane	DDI type 26	The risk or severity of adverse effects can be increased when Pristane is combined with Lutein.	0.999904	TRUE	TRUE	Common sage (FOOD00165)
DB00137	Lutein	FDB013245	(±)-Phenylalanine	DDI type 26	The risk or severity of adverse effects can be increased when (±)-Phenylalanine is combined with Lutein.	0.999101	TRUE	TRUE	Red bell pepper (FOOD00880), Wheat (FOOD00561), Oat (FOOD00022), Barley (FOOD00088), Rye (FOOD00169), Dill (FOOD00013), Broccoli (FOOD00034), Japanese pumpkin (FOOD00886), Spinach (FOOD00178), Swiss chard (FOOD00237)
DB00137	Lutein	FDB013269	Cholesterol	DDI type 46	Cholesterol may increase the anticoagulant activities of Lutein.	0.999898	TRUE	FALSE	Eggs (FOOD00619), Fish oil (FOOD00990), Sturgeon (FOOD00570), Haddock (FOOD00374), Butter (FOOD00648), Anatidae (FOOD00576), Crayfish (FOOD00534), Clawed lobster (FOOD00584), Other fish product (FOOD00665), Tallow (FOOD00674)
DB00137	Lutein	FDB013522	Fenchol	DDI type 26	The risk or severity of adverse effects can be increased when Fenchol is combined with Lutein.	0.970722	TRUE	TRUE	Sweet basil (FOOD00119), Lime (FOOD00053)
DB00137	Lutein	FDB013574	(±)-Borneol	DDI type 26	The risk or severity of adverse effects can be increased when (±)-Borneol is combined with Lutein.	0.972943	TRUE	TRUE	Common sage (FOOD00165), Cardamom (FOOD00074), Rosemary (FOOD00159), Pot marjoram (FOOD00123), Common thyme (FOOD00183), Spearmint (FOOD00112), Common oregano (FOOD00124), Lime (FOOD00053), Coriander (FOOD00061), Ceylon cinnamon (FOOD00051)
DB00137	Lutein	FDB013621	2-Phenylethyl pentanoate	DDI type 26	The risk or severity of adverse effects can be increased when 2-Phenylethyl pentanoate is combined with Lutein.	0.955514	TRUE	TRUE	Peppermint (FOOD00113)
DB00137	Lutein	FDB013828	Retinol	DDI type 26	The risk or severity of adverse effects can be increased when Retinol is combined with Lutein.	0.997554	TRUE	TRUE	Haddock (FOOD00374), Gadus (Common cod) (FOOD00515), Anatidae (FOOD00576), Anguilliformes (FOOD00577), Spotted seal (FOOD00423), Butterfat (FOOD00760), Margarine (FOOD00843), Margarine-like spread (FOOD00844), Northern bluefin tuna (FOOD00305), Butter (FOOD00648)
DB00137	Lutein	FDB013875	Dimethylmatairesinol	DDI type 26	The risk or severity of adverse effects can be increased when Dimethylmatairesinol is combined with Lutein.	0.986829	TRUE	TRUE	Sesame (FOOD00170)
DB00137	Lutein	FDB013897	Hexanoic acid	DDI type 26	The risk or severity of adverse effects can be increased when Hexanoic acid is combined with Lutein.	0.999617	TRUE	TRUE	Butterfat (FOOD00760), Butter (FOOD00648), Cream (FOOD00650), Margarine-like spread (FOOD00844), Coconut (FOOD00336), Cheese (FOOD00617), Dried milk (FOOD00689), Processed cheese (FOOD00711), Babassu palm (FOOD00773), Dulce de leche (FOOD00714)
DB00137	Lutein	FDB014346	Hexanenitrile	DDI type 26	The risk or severity of adverse effects can be increased when Hexanenitrile is combined with Lutein.	0.999794	TRUE	TRUE	Kohlrabi (FOOD00033)
DB00137	Lutein	FDB014504	Folic acid	DDI type 26	The risk or severity of adverse effects can be increased when Folic acid is combined with Lutein.	0.999566	TRUE	TRUE	Jute (FOOD00389), Spinach (FOOD00178), Leavening agent (FOOD00661), Garland chrysanthemum (FOOD00333), Endive (FOOD00048), Cabbage (FOOD00851), Parsley (FOOD00131), Asparagus (FOOD00021), Sour cherry (FOOD00146), Yardlong bean (FOOD00540)
DB00137	Lutein	FDB014580	(+)-Borneol	DDI type 26	The risk or severity of adverse effects can be increased when (+)-Borneol is combined with Lutein.	0.972943	TRUE	TRUE	Nutmeg (FOOD00118), Ginger (FOOD00206)
DB00137	Lutein	FDB014823	Acetylursolic acid	DDI type 26	The risk or severity of adverse effects can be increased when Acetylursolic acid is combined with Lutein.	0.999137	TRUE	TRUE	Rosemary (FOOD00159)
DB00137	Lutein	FDB014940	Linalool	DDI type 26	The risk or severity of adverse effects can be increased when Linalool is combined with Lutein.	0.996759	TRUE	TRUE	Spearmint (FOOD00112), Coriander (FOOD00061), Common thyme (FOOD00183), Cardamom (FOOD00074), Sweet basil (FOOD00119), Orange mint (FOOD00110), Sweet bay (FOOD00097), Common sage (FOOD00165), Turmeric (FOOD00068), Star anise (FOOD00090)
DB00137	Lutein	FDB014942	D-Linalool	DDI type 26	The risk or severity of adverse effects can be increased when D-Linalool is combined with Lutein.	0.996759	TRUE	TRUE	Sweet marjoram (FOOD00122)
DB00137	Lutein	FDB015199	Nordihydrocapsaicin	DDI type 6	The metabolism of Lutein can be decreased when combined with Nordihydrocapsaicin.	0.956457	TRUE	FALSE	Green bell pepper (FOOD00877), Orange bell pepper (FOOD00879), Pepper (FOOD00040), Red bell pepper (FOOD00880), Yellow bell pepper (FOOD00878), Pepper (C. frutescens) (FOOD00428)
DB00137	Lutein	FDB015201	Homodihydrocapsaicin	DDI type 26	The risk or severity of adverse effects can be increased when Lutein is combined with Homodihydrocapsaicin.	0.970429	TRUE	TRUE	Green bell pepper (FOOD00877), Orange bell pepper (FOOD00879), Pepper (FOOD00040), Pepper (C. frutescens) (FOOD00428), Red bell pepper (FOOD00880), Yellow bell pepper (FOOD00878)
DB00137	Lutein	FDB015352	Geosmin	DDI type 26	The risk or severity of adverse effects can be increased when Geosmin is combined with Lutein.	0.949657	TRUE	TRUE	Corn (FOOD00205)
DB00137	Lutein	FDB015469	beta-Ionone	DDI type 26	The risk or severity of adverse effects can be increased when Lutein is combined with beta-Ionone.	0.988006	TRUE	TRUE	Corn (FOOD00205), Black tea (FOOD00907), Green tea (FOOD00908), Herbal tea (FOOD00989), Red tea (FOOD00925), Tea (FOOD00038), Carrot (FOOD00245), Wild carrot (FOOD00072), Common oregano (FOOD00124), Hyssop (FOOD00089)
DB00137	Lutein	FDB015469	beta-Ionone	DDI type 26	The risk or severity of adverse effects can be increased when beta-Ionone is combined with Lutein.	0.999173	TRUE	TRUE	Corn (FOOD00205), Black tea (FOOD00907), Green tea (FOOD00908), Herbal tea (FOOD00989), Red tea (FOOD00925), Tea (FOOD00038), Carrot (FOOD00245), Wild carrot (FOOD00072), Common oregano (FOOD00124), Hyssop (FOOD00089)
DB00137	Lutein	FDB015503	Cycloartenol	DDI type 26	The risk or severity of adverse effects can be increased when Cycloartenol is combined with Lutein.	0.998963	TRUE	TRUE	Evening primrose (FOOD00120)
DB00137	Lutein	FDB015552	Sinensetin	DDI type 26	The risk or severity of adverse effects can be increased when Sinensetin is combined with Lutein.	0.995736	TRUE	TRUE	Sweet orange (FOOD00057)
DB00137	Lutein	FDB017346	1,7,7-Trimethyltricyclo[2.2.1.02,6]heptane	DDI type 26	The risk or severity of adverse effects can be increased when 1,7,7-Trimethyltricyclo[2.2.1.02,6]heptane is combined with Lutein.	0.99814	TRUE	TRUE	Ginger (FOOD00206), Common sage (FOOD00165), Pot marjoram (FOOD00123)
DB00137	Lutein	FDB017358	1-Isopropyl-4-methylbenzene	DDI type 54	1-Isopropyl-4-methylbenzene may increase the central nervous system depressant (CNS depressant) activities of Lutein.	0.944417	TRUE	FALSE	Cardamom (FOOD00074), Common thyme (FOOD00183), Cumin (FOOD00067), Summer savory (FOOD00167), Dill (FOOD00013), Common oregano (FOOD00124), Turmeric (FOOD00068), Cornmint (FOOD00111), Pot marjoram (FOOD00123), Ginger (FOOD00206)
DB00137	Lutein	FDB018227	Heliantriol C	DDI type 26	The risk or severity of adverse effects can be increased when Heliantriol C is combined with Lutein.	0.998967	TRUE	TRUE	Sunflower (FOOD00086)
DB00137	Lutein	FDB020050	Pentyl formate	DDI type 26	The risk or severity of adverse effects can be increased when Pentyl formate is combined with Lutein.	0.993425	TRUE	TRUE	Milk (Cow) (FOOD00618)
DB00137	Lutein	FDB020161	2-Phenylethyl formate	DDI type 26	The risk or severity of adverse effects can be increased when Lutein is combined with 2-Phenylethyl formate.	0.965003	TRUE	TRUE	Bilberry (FOOD00193)
DB00137	Lutein	FDB020783	Capsiamide	DDI type 26	The risk or severity of adverse effects can be increased when Capsiamide is combined with Lutein.	0.999667	TRUE	TRUE	Green bell pepper (FOOD00877), Orange bell pepper (FOOD00879), Pepper (FOOD00040), Red bell pepper (FOOD00880), Yellow bell pepper (FOOD00878), Pepper (C. frutescens) (FOOD00428)
DB00137	Lutein	FDB021586	Vitamin D	DDI type 26	The risk or severity of adverse effects can be increased when Vitamin D is combined with Lutein.	0.987557	TRUE	TRUE	Haddock (FOOD00374), Gadus (Common cod) (FOOD00515), Maitake (FOOD00555), Common carp (FOOD00322), Lake trout (FOOD00582), Anguilliformes (FOOD00577), Rainbow trout (FOOD00444), Atlantic mackerel (FOOD00293), Salmonidae (Salmon, Trout) (FOOD00493), Swordfish (FOOD00487)
DB00137	Lutein	FDB021621	C18:1, n-9	DDI type 26	The risk or severity of adverse effects can be increased when C18:1, n-9 is combined with Lutein.	0.999637	TRUE	TRUE	Rape (FOOD00029), Olive (FOOD00121), Safflower (FOOD00042), Pecan nut (FOOD00044), Other animal fat (FOOD00682), Lard (FOOD00681), Hazelnut (FOOD00376), Tallow (FOOD00674), Cocoa butter (FOOD00684), Peanut (FOOD00016)
DB00137	Lutein	FDB021782	25-Hydroxycholecalciferol	DDI type 26	The risk or severity of adverse effects can be increased when 25-Hydroxycholecalciferol is combined with Lutein.	0.998274	TRUE	TRUE	Sausage (FOOD00652), Other animal fat (FOOD00682), Domestic pig (FOOD00536), Milk (Cow) (FOOD00618)
DB00137	Lutein	FDB021793	24,25-Dihydroxyvitamin D3	DDI type 26	The risk or severity of adverse effects can be increased when 24,25-Dihydroxyvitamin D3 is combined with Lutein.	0.998875	TRUE	TRUE	Haddock (FOOD00374), Gadus (Common cod) (FOOD00515), Salmonidae (Salmon, Trout) (FOOD00493), Lake trout (FOOD00582), Anguilliformes (FOOD00577), Atlantic halibut (FOOD00516), Charr (FOOD00571), Greenland halibut/turbot (FOOD00370), Rainbow trout (FOOD00444), Clupeinae (Herring, Sardine, Sprat) (FOOD00520)
DB00137	Lutein	FDB021812	Aminoadipic acid	DDI type 26	The risk or severity of adverse effects can be increased when Aminoadipic acid is combined with Lutein.	0.999829	TRUE	TRUE	Rye (FOOD00169), Wheat (FOOD00561), Broccoli (FOOD00034), Dill (FOOD00013), Sunburst squash (pattypan squash) (FOOD00874), Swiss chard (FOOD00237), Yellow wax bean (FOOD00882), Green zucchini (FOOD00875), Potato (FOOD00175), Green bean (FOOD00883)
DB00137	Lutein	FDB022621	25-Hydroxyvitamin D2	DDI type 26	The risk or severity of adverse effects can be increased when 25-Hydroxyvitamin D2 is combined with Lutein.	0.998059	TRUE	TRUE	Milk (Cow) (FOOD00618)
DB00137	Lutein	FDB022886	Cobalamin	DDI type 13	The therapeutic efficacy of Cobalamin can be decreased when used in combination with Lutein.	0.983476	FALSE	FALSE	Northern pike (FOOD00431), Oyster mushroom (FOOD00553), Anatidae (FOOD00576), Crab (FOOD00573), Marine mussel (FOOD00587), Common octopus (FOOD00339), Rabbit (FOOD00528), Scombridae (Bonito, Mackerel, Tuna) (FOOD00586), Sturgeon (FOOD00570), Cattle (Beef, Veal) (FOOD00495)
DB00137	Lutein	FDB023414	Vernolic acid	DDI type 26	The risk or severity of adverse effects can be increased when Vernolic acid is combined with Lutein.	0.999705	TRUE	TRUE	Rice (FOOD00125)
DB00138	Cystine	FDB000340	1,4-Naphtoquinone	DDI type 9	The serum concentration of 1,4-Naphtoquinone can be decreased when it is combined with Cystine.	0.956206	FALSE	FALSE	Liquor (FOOD00616)
DB00138	Cystine	FDB000446	L-Tyrosine	DDI type 26	The risk or severity of adverse effects can be increased when L-Tyrosine is combined with Cystine.	0.999957	TRUE	TRUE	Milk (Cow) (FOOD00618), Casein (FOOD00659), Other soy product (FOOD00271), Beluga whale (FOOD00300), Red bell pepper (FOOD00880), Buttermilk (FOOD00692), Smelt (FOOD00519), Soy bean (FOOD00085), Spirulina (FOOD00480), Dried milk (FOOD00689)
DB00138	Cystine	FDB000453	Theophylline	DDI type 26	The risk or severity of adverse effects can be increased when Theophylline is combined with Cystine.	0.994972	TRUE	TRUE	Cocoa bean (FOOD00182), Black tea (FOOD00907), Green tea (FOOD00908), Herbal tea (FOOD00989), Red tea (FOOD00925), Tea (FOOD00038)
DB00138	Cystine	FDB000455	Theobromine	DDI type 26	The risk or severity of adverse effects can be increased when Theobromine is combined with Cystine.	0.995305	TRUE	TRUE	Cocoa powder (FOOD00685), Chocolate (FOOD00687), Cocoa bean (FOOD00182), Coffee mocha (FOOD00743), Icing (FOOD00700), Syrup (FOOD00673), Waffle (FOOD00735), Breakfast cereal (FOOD00270), Nutritional drink (FOOD00754), Black tea (FOOD00907)
DB00138	Cystine	FDB000558	Alliin	DDI type 26	The risk or severity of adverse effects can be increased when Alliin is combined with Cystine.	0.997178	TRUE	TRUE	Soft-necked garlic (FOOD00850)
DB00138	Cystine	FDB000567	L-DOPA	DDI type 26	The risk or severity of adverse effects can be increased when L-DOPA is combined with Cystine.	0.999603	TRUE	TRUE	Broad bean (FOOD00197), Swiss chard (FOOD00237), Yellow wax bean (FOOD00882), Spinach (FOOD00178), Green bean (FOOD00883), Red beetroot (FOOD00264), Broccoli (FOOD00034), Dill (FOOD00013), Orange bell pepper (FOOD00879), Yellow zucchini (FOOD00876)
DB00138	Cystine	FDB000753	Ethanol	DDI type 54	Cystine may increase the central nervous system depressant (CNS depressant) activities of Ethanol.	0.998894	FALSE	FALSE	Gin (FOOD00625), Other alcoholic beverage (FOOD00278), Rum (FOOD00629), Vodka (FOOD00622), Spirit (FOOD00276), Whisky (FOOD00623), Liquor (FOOD00616), Madeira wine (FOOD00633), Vanilla (FOOD00195), Sake (FOOD00738)
DB00138	Cystine	FDB000757	Nonane	DDI type 26	The risk or severity of adverse effects can be increased when Nonane is combined with Cystine.	0.999203	TRUE	TRUE	Lime (FOOD00053), Common oregano (FOOD00124)
DB00138	Cystine	FDB000765	Hexane	DDI type 26	The risk or severity of adverse effects can be increased when Cystine is combined with Hexane.	0.997413	TRUE	TRUE	Kohlrabi (FOOD00033)
DB00138	Cystine	FDB000765	Hexane	DDI type 26	The risk or severity of adverse effects can be increased when Hexane is combined with Cystine.	0.9997	TRUE	TRUE	Kohlrabi (FOOD00033)
DB00138	Cystine	FDB000768	Pentane	DDI type 26	The risk or severity of adverse effects can be increased when Cystine is combined with Pentane.	0.997995	TRUE	TRUE	Kohlrabi (FOOD00033)
DB00138	Cystine	FDB000768	Pentane	DDI type 26	The risk or severity of adverse effects can be increased when Pentane is combined with Cystine.	0.999613	TRUE	TRUE	Kohlrabi (FOOD00033)
DB00138	Cystine	FDB000842	2,4-Dihydroxybenzoic acid	DDI type 15	2,4-Dihydroxybenzoic acid may decrease the excretion rate of Cystine which could result in a higher serum level.	0.993536	TRUE	FALSE	American cranberry (FOOD00192), Olive (FOOD00121)
DB00138	Cystine	FDB000844	Gentisic acid	DDI type 15	Gentisic acid may decrease the excretion rate of Cystine which could result in a higher serum level.	0.997245	TRUE	FALSE	Tarragon (FOOD00019), Common thyme (FOOD00183), Common sage (FOOD00165), Lemon balm (FOOD00108), Parsley (FOOD00131), Rosemary (FOOD00159), Horseradish (FOOD00018), Sweet basil (FOOD00119), Peanut (FOOD00016), Hyssop (FOOD00089)
DB00138	Cystine	FDB000845	2,6-Dihydroxybenzoic acid	DDI type 15	2,6-Dihydroxybenzoic acid may decrease the excretion rate of Cystine which could result in a higher serum level.	0.999345	TRUE	FALSE	Beer (FOOD00268), Olive (FOOD00121)
DB00138	Cystine	FDB000846	Vanillic acid	DDI type 15	Vanillic acid may decrease the excretion rate of Cystine which could result in a higher serum level.	0.999826	TRUE	FALSE	Coriander (FOOD00061), Garden onion (FOOD00006), Sweet basil (FOOD00119), Olive (FOOD00121), Common oregano (FOOD00124), Horseradish (FOOD00018), Peanut (FOOD00016), Cocoa powder (FOOD00685), Swiss chard (FOOD00237), Yellow wax bean (FOOD00882)
DB00138	Cystine	FDB000848	3,5-Dihydroxybenzoic acid	DDI type 15	3,5-Dihydroxybenzoic acid may decrease the excretion rate of Cystine which could result in a higher serum level.	0.999094	TRUE	FALSE	Beer (FOOD00268)
DB00138	Cystine	FDB000893	Phenol	DDI type 15	Phenol may decrease the excretion rate of Cystine which could result in a higher serum level.	0.991669	TRUE	FALSE	Sweet marjoram (FOOD00122), Arabica coffee (FOOD00059), Coffee (FOOD00058), Robusta coffee (FOOD00060), Safflower (FOOD00042), Cocoa powder (FOOD00685), Highbush blueberry (FOOD00191), Bilberry (FOOD00193)
DB00138	Cystine	FDB000968	Pentyl pentanoate	DDI type 26	The risk or severity of adverse effects can be increased when Pentyl pentanoate is combined with Cystine.	0.997772	TRUE	TRUE	Peppermint (FOOD00113)
DB00138	Cystine	FDB001022	Ethyl hexadecanoate	DDI type 13	The therapeutic efficacy of Ethyl hexadecanoate can be decreased when used in combination with Cystine.	0.969525	FALSE	FALSE	Coriander (FOOD00061)
DB00138	Cystine	FDB001022	Ethyl hexadecanoate	DDI type 26	The risk or severity of adverse effects can be increased when Ethyl hexadecanoate is combined with Cystine.	0.999668	TRUE	TRUE	Coriander (FOOD00061)
DB00138	Cystine	FDB001037	4-Aminobenzoic acid	DDI type 26	The risk or severity of adverse effects can be increased when 4-Aminobenzoic acid is combined with Cystine.	0.999217	TRUE	TRUE	Pineapple (FOOD00012)
DB00138	Cystine	FDB001176	Isodulcitol	DDI type 13	The therapeutic efficacy of Isodulcitol can be decreased when used in combination with Cystine.	0.976494	FALSE	FALSE	Flaxseed (FOOD00101)
DB00138	Cystine	FDB001202	D-Mannose	DDI type 13	The therapeutic efficacy of D-Mannose can be decreased when used in combination with Cystine.	0.947158	FALSE	FALSE	Corn (FOOD00205)
DB00138	Cystine	FDB001351	Gitonin	DDI type 9	The serum concentration of Gitonin can be decreased when it is combined with Cystine.	0.997036	FALSE	FALSE	Soft-necked garlic (FOOD00850)
DB00138	Cystine	FDB001353	Uttronin A	DDI type 9	The serum concentration of Uttronin A can be decreased when it is combined with Cystine.	0.997101	FALSE	FALSE	Soft-necked garlic (FOOD00850)
DB00138	Cystine	FDB001512	1,2-Benzenediol	DDI type 15	1,2-Benzenediol may decrease the excretion rate of Cystine which could result in a higher serum level.	0.998923	TRUE	FALSE	Arabica coffee (FOOD00059), Coffee (FOOD00058), Robusta coffee (FOOD00060), Cocoa powder (FOOD00685), Beer (FOOD00268)
DB00138	Cystine	FDB001532	Betulinic acid	DDI type 9	The serum concentration of Betulinic acid can be decreased when it is combined with Cystine.	0.985912	FALSE	FALSE	Winged bean (FOOD00507), Pomegranate (FOOD00151), Java plum (FOOD00386), Common walnut (FOOD00094), Nance (FOOD00788)
DB00138	Cystine	FDB002100	Caffeine	DDI type 26	The risk or severity of adverse effects can be increased when Caffeine is combined with Cystine.	0.974047	TRUE	TRUE	Arabica coffee (FOOD00059), Coffee mocha (FOOD00743), Cocoa bean (FOOD00182), Cocoa powder (FOOD00685), Chocolate (FOOD00687), Coffee (FOOD00058), Robusta coffee (FOOD00060), Liquor (FOOD00616), Black tea (FOOD00907), Green tea (FOOD00908)
DB00138	Cystine	FDB002119	6-Propyltridecane	DDI type 26	The risk or severity of adverse effects can be increased when 6-Propyltridecane is combined with Cystine.	0.999505	TRUE	TRUE	Black walnut (FOOD00093)
DB00138	Cystine	FDB002412	Tangeritin	DDI type 26	The risk or severity of adverse effects can be increased when Cystine is combined with Tangeritin.	0.997189	TRUE	TRUE	Sweet orange (FOOD00057)
DB00138	Cystine	FDB002412	Tangeritin	DDI type 26	The risk or severity of adverse effects can be increased when Tangeritin is combined with Cystine.	0.999747	TRUE	TRUE	Sweet orange (FOOD00057)
DB00138	Cystine	FDB002465	Tetramethylscutellarein	DDI type 26	The risk or severity of adverse effects can be increased when Tetramethylscutellarein is combined with Cystine.	0.998999	TRUE	TRUE	Sweet orange (FOOD00057)
DB00138	Cystine	FDB002590	m-Coumaric acid	DDI type 13	The therapeutic efficacy of Cystine can be decreased when used in combination with m-Coumaric acid.	0.994494	TRUE	FALSE	Olive (FOOD00121), Corn (FOOD00205), Beer (FOOD00268)
DB00138	Cystine	FDB002880	Alliospiroside C	DDI type 9	The serum concentration of Alliospiroside C can be decreased when it is combined with Cystine.	0.998965	FALSE	FALSE	Garden onion (FOOD00006)
DB00138	Cystine	FDB002881	Alliospiroside D	DDI type 9	The serum concentration of Alliospiroside D can be decreased when it is combined with Cystine.	0.998434	FALSE	FALSE	Garden onion (FOOD00006)
DB00138	Cystine	FDB003051	Cetyl alcohol	DDI type 26	The risk or severity of adverse effects can be increased when Cystine is combined with Cetyl alcohol.	0.997494	TRUE	TRUE	Kohlrabi (FOOD00033)
DB00138	Cystine	FDB003051	Cetyl alcohol	DDI type 26	The risk or severity of adverse effects can be increased when Cetyl alcohol is combined with Cystine.	0.999923	TRUE	TRUE	Kohlrabi (FOOD00033)
DB00138	Cystine	FDB003107	Coronaric acid	DDI type 26	The risk or severity of adverse effects can be increased when Coronaric acid is combined with Cystine.	0.999502	TRUE	TRUE	Rice (FOOD00125)
DB00138	Cystine	FDB003175	1-Pentanesulfenothioic acid	DDI type 26	The risk or severity of adverse effects can be increased when Cystine is combined with 1-Pentanesulfenothioic acid.	0.999317	TRUE	TRUE	Chives (FOOD00009)
DB00138	Cystine	FDB003175	1-Pentanesulfenothioic acid	DDI type 26	The risk or severity of adverse effects can be increased when 1-Pentanesulfenothioic acid is combined with Cystine.	0.999491	TRUE	TRUE	Chives (FOOD00009)
DB00138	Cystine	FDB003255	2-Ethyl-1-hexanol	DDI type 26	The risk or severity of adverse effects can be increased when 2-Ethyl-1-hexanol is combined with Cystine.	0.993209	TRUE	TRUE	Corn (FOOD00205), Peppermint (FOOD00113)
DB00138	Cystine	FDB003306	Nonanoic acid	DDI type 26	The risk or severity of adverse effects can be increased when Nonanoic acid is combined with Cystine.	0.987919	TRUE	TRUE	Coconut (FOOD00336), Butter (FOOD00648), Oil palm (FOOD00591), Cheese (FOOD00617), Cream (FOOD00650), Dried milk (FOOD00689), Whey (FOOD00658), Milk (Other mammals) (FOOD00690), Other fermented milk (FOOD00693), Ymer (FOOD00638)
DB00138	Cystine	FDB003336	Octanoic acid	DDI type 26	The risk or severity of adverse effects can be increased when Octanoic acid is combined with Cystine.	0.989167	TRUE	TRUE	Babassu palm (FOOD00773), Coconut (FOOD00336), Oil palm (FOOD00591), Butter (FOOD00648), Butterfat (FOOD00760), Coffee mocha (FOOD00743), Common sage (FOOD00165), Cream substitute (FOOD00713), Cheese (FOOD00617), Cream (FOOD00650)
DB00138	Cystine	FDB003342	2-Octanol	DDI type 26	The risk or severity of adverse effects can be increased when 2-Octanol is combined with Cystine.	0.993847	TRUE	TRUE	Corn (FOOD00205)
DB00138	Cystine	FDB003343	3-Octanol	DDI type 26	The risk or severity of adverse effects can be increased when 3-Octanol is combined with Cystine.	0.992435	TRUE	TRUE	Cornmint (FOOD00111), Spearmint (FOOD00112), Orange mint (FOOD00110), Common oregano (FOOD00124), Peppermint (FOOD00113), Rosemary (FOOD00159), Lemon balm (FOOD00108), Hyssop (FOOD00089)
DB00138	Cystine	FDB003654	Ornithine	DDI type 26	The risk or severity of adverse effects can be increased when Cystine is combined with Ornithine.	0.985194	TRUE	TRUE	Green zucchini (FOOD00875), Potato (FOOD00175), Garden onion (FOOD00006), Broccoli (FOOD00034), Sunburst squash (pattypan squash) (FOOD00874), Spinach (FOOD00178), Cucumber (FOOD00065), Yellow bell pepper (FOOD00878), Green bell pepper (FOOD00877), Orange bell pepper (FOOD00879)
DB00138	Cystine	FDB003668	Prostaglandin A-1	DDI type 26	The risk or severity of adverse effects can be increased when Prostaglandin A-1 is combined with Cystine.	0.999166	TRUE	TRUE	Garden onion (FOOD00006)
DB00138	Cystine	FDB003685	S-Allylmercaptocysteine	DDI type 26	The risk or severity of adverse effects can be increased when S-Allylmercaptocysteine is combined with Cystine.	0.993292	TRUE	TRUE	Soft-necked garlic (FOOD00850)
DB00138	Cystine	FDB003771	Gadoleic acid	DDI type 26	The risk or severity of adverse effects can be increased when Cystine is combined with Gadoleic acid.	0.943818	TRUE	TRUE	Fish oil (FOOD00990), Other fish product (FOOD00665), Lumpsucker (FOOD00585), White mustard (FOOD00413), Greenland halibut/turbot (FOOD00370), Scombridae (Bonito, Mackerel, Tuna) (FOOD00586), Gadus (Common cod) (FOOD00515), Anguilliformes (FOOD00577), Rape (FOOD00029), Colorado pinyon (FOOD00433)
DB00138	Cystine	FDB003771	Gadoleic acid	DDI type 26	The risk or severity of adverse effects can be increased when Gadoleic acid is combined with Cystine.	0.99575	TRUE	TRUE	Fish oil (FOOD00990), Other fish product (FOOD00665), Lumpsucker (FOOD00585), White mustard (FOOD00413), Greenland halibut/turbot (FOOD00370), Scombridae (Bonito, Mackerel, Tuna) (FOOD00586), Gadus (Common cod) (FOOD00515), Anguilliformes (FOOD00577), Rape (FOOD00029), Colorado pinyon (FOOD00433)
DB00138	Cystine	FDB003938	Flavonoids	DDI type 27	The risk or severity of bleeding can be increased when Flavonoids is combined with Cystine.	0.998483	TRUE	TRUE	Common grape (FOOD00204), Passion fruit (FOOD00128), Fig (FOOD00081), Blackcurrant (FOOD00155), Rose hip (FOOD00446), Turmeric (FOOD00068)
DB00138	Cystine	FDB004105	1-Heptadecene	DDI type 26	The risk or severity of adverse effects can be increased when Cystine is combined with 1-Heptadecene.	0.993381	TRUE	TRUE	Safflower (FOOD00042)
DB00138	Cystine	FDB004105	1-Heptadecene	DDI type 26	The risk or severity of adverse effects can be increased when 1-Heptadecene is combined with Cystine.	0.999405	TRUE	TRUE	Safflower (FOOD00042)
DB00138	Cystine	FDB004234	Melatonin	DDI type 26	The risk or severity of adverse effects can be increased when Melatonin is combined with Cystine.	0.999978	TRUE	TRUE	Corn (FOOD00205)
DB00138	Cystine	FDB004514	2-Hexanol	DDI type 26	The risk or severity of adverse effects can be increased when Cystine is combined with 2-Hexanol.	0.965953	TRUE	TRUE	Safflower (FOOD00042)
DB00138	Cystine	FDB004514	2-Hexanol	DDI type 26	The risk or severity of adverse effects can be increased when 2-Hexanol is combined with Cystine.	0.998498	TRUE	TRUE	Safflower (FOOD00042)
DB00138	Cystine	FDB004676	Heptadecanoic acid	DDI type 26	The risk or severity of adverse effects can be increased when Heptadecanoic acid is combined with Cystine.	0.999958	TRUE	TRUE	Cinnamon (FOOD00572), Cattle (Beef, Veal) (FOOD00495), Sturgeon (FOOD00570), Crab (FOOD00573), Sausage (FOOD00652), Rabbit (FOOD00528), Cashew nut (FOOD00011), Oyster mushroom (FOOD00553), Clawed lobster (FOOD00584), Atlantic halibut (FOOD00516)
DB00138	Cystine	FDB004731	N-Tetradecane	DDI type 26	The risk or severity of adverse effects can be increased when Cystine is combined with N-Tetradecane.	0.987766	TRUE	TRUE	Black walnut (FOOD00093)
DB00138	Cystine	FDB004731	N-Tetradecane	DDI type 26	The risk or severity of adverse effects can be increased when N-Tetradecane is combined with Cystine.	0.999979	TRUE	TRUE	Black walnut (FOOD00093)
DB00138	Cystine	FDB004741	(Z)-3-Hexenylbenzoate	DDI type 26	The risk or severity of adverse effects can be increased when (Z)-3-Hexenylbenzoate is combined with Cystine.	0.967871	TRUE	TRUE	Safflower (FOOD00042)
DB00138	Cystine	FDB005197	Ethyl pentadecanoate	DDI type 26	The risk or severity of adverse effects can be increased when Ethyl pentadecanoate is combined with Cystine.	0.999902	TRUE	TRUE	Coriander (FOOD00061)
DB00138	Cystine	FDB005482	Glycosides	DDI type 10	The serum concentration of Glycosides can be increased when it is combined with Cystine.	0.997334	FALSE	FALSE	Apricot (FOOD00144), Fig (FOOD00081)
DB00138	Cystine	FDB005802	Calamene	DDI type 26	The risk or severity of adverse effects can be increased when Calamene is combined with Cystine.	0.999956	TRUE	TRUE	Star anise (FOOD00090), Common sage (FOOD00165)
DB00138	Cystine	FDB005814	1,2,3-Trimethylbenzene	DDI type 26	The risk or severity of adverse effects can be increased when 1,2,3-Trimethylbenzene is combined with Cystine.	0.95011	TRUE	TRUE	Black walnut (FOOD00093)
DB00138	Cystine	FDB005827	3-Methyltridecane	DDI type 26	The risk or severity of adverse effects can be increased when 3-Methyltridecane is combined with Cystine.	0.999966	TRUE	TRUE	Black walnut (FOOD00093)
DB00138	Cystine	FDB006365	alpha,alpha-Dimethylbenzyl alcohol	DDI type 9	The serum concentration of alpha,alpha-Dimethylbenzyl alcohol can be decreased when it is combined with Cystine.	0.990166	FALSE	FALSE	Pot marjoram (FOOD00123)
DB00138	Cystine	FDB006916	alpha-Fenchyl acetate	DDI type 26	The risk or severity of adverse effects can be increased when alpha-Fenchyl acetate is combined with Cystine.	0.999767	TRUE	TRUE	Rosemary (FOOD00159)
DB00138	Cystine	FDB006925	cis-Myrtenol	DDI type 26	The risk or severity of adverse effects can be increased when cis-Myrtenol is combined with Cystine.	0.999931	TRUE	TRUE	Rosemary (FOOD00159)
DB00138	Cystine	FDB007498	Diethylstilbesterol	DDI type 13	The therapeutic efficacy of Cystine can be decreased when used in combination with Diethylstilbesterol.	0.969335	TRUE	FALSE	Gram bean (FOOD00199)
DB00138	Cystine	FDB007854	Alliospiroside A	DDI type 9	The serum concentration of Alliospiroside A can be decreased when it is combined with Cystine.	0.998936	FALSE	FALSE	Garden onion (FOOD00006)
DB00138	Cystine	FDB007855	Alliospiroside B	DDI type 9	The serum concentration of Alliospiroside B can be decreased when it is combined with Cystine.	0.998168	FALSE	FALSE	Garden onion (FOOD00006)
DB00138	Cystine	FDB008053	1-Heptanol	DDI type 26	The risk or severity of adverse effects can be increased when 1-Heptanol is combined with Cystine.	0.998949	TRUE	TRUE	Corn (FOOD00205), Black walnut (FOOD00093), Mandarin orange (Clementine, Tangerine) (FOOD00056)
DB00138	Cystine	FDB008056	3-Heptanol	DDI type 26	The risk or severity of adverse effects can be increased when 3-Heptanol is combined with Cystine.	0.994301	TRUE	TRUE	Peppermint (FOOD00113)
DB00138	Cystine	FDB008068	Hexanal	DDI type 26	The risk or severity of adverse effects can be increased when Hexanal is combined with Cystine.	0.988699	TRUE	TRUE	Corn (FOOD00205), Black walnut (FOOD00093), Black tea (FOOD00907), Green tea (FOOD00908), Herbal tea (FOOD00989), Red tea (FOOD00925), Tea (FOOD00038), Milk (Cow) (FOOD00618), Orange mint (FOOD00110), Common oregano (FOOD00124)
DB00138	Cystine	FDB008072	1-Hexanol	DDI type 26	The risk or severity of adverse effects can be increased when Cystine is combined with 1-Hexanol.	0.995659	TRUE	TRUE	Corn (FOOD00205), Black walnut (FOOD00093), Lovage (FOOD00100), Hyssop (FOOD00089), Milk (Cow) (FOOD00618), Safflower (FOOD00042), Soft-necked garlic (FOOD00850), Parsley (FOOD00131), Sweet orange (FOOD00057), Bilberry (FOOD00193)
DB00138	Cystine	FDB008072	1-Hexanol	DDI type 26	The risk or severity of adverse effects can be increased when 1-Hexanol is combined with Cystine.	0.999601	TRUE	TRUE	Corn (FOOD00205), Black walnut (FOOD00093), Lovage (FOOD00100), Hyssop (FOOD00089), Milk (Cow) (FOOD00618), Safflower (FOOD00042), Soft-necked garlic (FOOD00850), Parsley (FOOD00131), Sweet orange (FOOD00057), Bilberry (FOOD00193)
DB00138	Cystine	FDB008073	3-Hexanol	DDI type 26	The risk or severity of adverse effects can be increased when 3-Hexanol is combined with Cystine.	0.998015	TRUE	TRUE	Safflower (FOOD00042)
DB00138	Cystine	FDB008230	1-Pentanol	DDI type 26	The risk or severity of adverse effects can be increased when Cystine is combined with 1-Pentanol.	0.999327	TRUE	TRUE	Black walnut (FOOD00093), Common thyme (FOOD00183), Black tea (FOOD00907), Green tea (FOOD00908), Herbal tea (FOOD00989), Red tea (FOOD00925), Tea (FOOD00038), Milk (Cow) (FOOD00618), Safflower (FOOD00042), Bilberry (FOOD00193)
DB00138	Cystine	FDB008230	1-Pentanol	DDI type 26	The risk or severity of adverse effects can be increased when 1-Pentanol is combined with Cystine.	0.999814	TRUE	TRUE	Black walnut (FOOD00093), Common thyme (FOOD00183), Black tea (FOOD00907), Green tea (FOOD00908), Herbal tea (FOOD00989), Red tea (FOOD00925), Tea (FOOD00038), Milk (Cow) (FOOD00618), Safflower (FOOD00042), Bilberry (FOOD00193)
DB00138	Cystine	FDB009029	Bornyl acetate	DDI type 26	The risk or severity of adverse effects can be increased when Bornyl acetate is combined with Cystine.	0.999757	TRUE	TRUE	Rosemary (FOOD00159), Common sage (FOOD00165), Sweet basil (FOOD00119), Common thyme (FOOD00183), Spearmint (FOOD00112), Ginger (FOOD00206), Cumin (FOOD00067), Carrot (FOOD00245), Wild carrot (FOOD00072), Ceylon cinnamon (FOOD00051)
DB00138	Cystine	FDB009636	Isoborneol	DDI type 26	The risk or severity of adverse effects can be increased when Isoborneol is combined with Cystine.	0.999828	TRUE	TRUE	Common sage (FOOD00165), Turmeric (FOOD00068), Rosemary (FOOD00159), Common oregano (FOOD00124)
DB00138	Cystine	FDB010039	Pentylamine	DDI type 26	The risk or severity of adverse effects can be increased when Cystine is combined with Pentylamine.	0.998213	TRUE	TRUE	Green bell pepper (FOOD00877), Orange bell pepper (FOOD00879), Pepper (FOOD00040), Red bell pepper (FOOD00880), Yellow bell pepper (FOOD00878), Cabbage (FOOD00851), White cabbage (FOOD00887), Apple (FOOD00105)
DB00138	Cystine	FDB010039	Pentylamine	DDI type 26	The risk or severity of adverse effects can be increased when Pentylamine is combined with Cystine.	0.997825	TRUE	TRUE	Green bell pepper (FOOD00877), Orange bell pepper (FOOD00879), Pepper (FOOD00040), Red bell pepper (FOOD00880), Yellow bell pepper (FOOD00878), Cabbage (FOOD00851), White cabbage (FOOD00887), Apple (FOOD00105)
DB00138	Cystine	FDB010420	Fenchyl acetate	DDI type 26	The risk or severity of adverse effects can be increased when Fenchyl acetate is combined with Cystine.	0.999767	TRUE	TRUE	Sweet basil (FOOD00119)
DB00138	Cystine	FDB010504	4-Hydroxybenzaldehyde	DDI type 15	4-Hydroxybenzaldehyde may decrease the excretion rate of Cystine which could result in a higher serum level.	0.998335	TRUE	FALSE	Vinegar (FOOD00628), Oat (FOOD00022)
DB00138	Cystine	FDB010507	3-Hydroxybenzoic acid	DDI type 15	3-Hydroxybenzoic acid may decrease the excretion rate of Cystine which could result in a higher serum level.	0.999746	TRUE	FALSE	American cranberry (FOOD00192), Beer (FOOD00268)
DB00138	Cystine	FDB010508	4-Hydroxybenzoic acid	DDI type 15	4-Hydroxybenzoic acid may decrease the excretion rate of Cystine which could result in a higher serum level.	0.999058	TRUE	FALSE	Red huckleberry (FOOD00223), Rabbiteye blueberry (FOOD00898), Coriander (FOOD00061), Garden onion (FOOD00006), Loquat (FOOD00076), Highbush blueberry (FOOD00191), Olive (FOOD00121), Strawberry (FOOD00083), Swiss chard (FOOD00237), Carrot (FOOD00245)
DB00138	Cystine	FDB010527	Zingerone	DDI type 9	The serum concentration of Zingerone can be decreased when it is combined with Cystine.	0.991479	FALSE	FALSE	Pot marjoram (FOOD00123), Ginger (FOOD00206)
DB00138	Cystine	FDB010580	2-Phenylethylamine	DDI type 26	The risk or severity of adverse effects can be increased when 2-Phenylethylamine is combined with Cystine.	0.999882	TRUE	TRUE	Red raspberry (FOOD00162), Cabbage (FOOD00851), White cabbage (FOOD00887), Broccoli (FOOD00034), Swiss chard (FOOD00237), Turnip (FOOD00036), Nanking cherry (FOOD00885), Eggplant (FOOD00174), Spinach (FOOD00178), Orange bell pepper (FOOD00879)
DB00138	Cystine	FDB010583	Octopamine	DDI type 26	The risk or severity of adverse effects can be increased when Octopamine is combined with Cystine.	0.986541	TRUE	TRUE	Mandarin orange (Clementine, Tangerine) (FOOD00056), Sweet orange (FOOD00057)
DB00138	Cystine	FDB010779	N-trans-Feruloyloctopamine	DDI type 26	The risk or severity of adverse effects can be increased when N-trans-Feruloyloctopamine is combined with Cystine.	0.991806	TRUE	TRUE	Green bell pepper (FOOD00877), Orange bell pepper (FOOD00879), Pepper (FOOD00040), Red bell pepper (FOOD00880), Yellow bell pepper (FOOD00878)
DB00138	Cystine	FDB010873	1-(4-Methoxyphenyl)-2-propanone	DDI type 15	1-(4-Methoxyphenyl)-2-propanone may decrease the excretion rate of Cystine which could result in a higher serum level.	0.989818	TRUE	FALSE	Anise (FOOD00137)
DB00138	Cystine	FDB011258	o-Coumaric acid	DDI type 13	The therapeutic efficacy of Cystine can be decreased when used in combination with o-Coumaric acid.	0.992565	TRUE	FALSE	Corn (FOOD00205), Hard wheat (FOOD00242), Olive (FOOD00121), American cranberry (FOOD00192), Fennel (FOOD00082), Date (FOOD00135), Peanut (FOOD00016), Common wheat (FOOD00187), Beer (FOOD00268), Grape wine (FOOD00612)
DB00138	Cystine	FDB011261	Dibutyl phthalate	DDI type 26	The risk or severity of adverse effects can be increased when Dibutyl phthalate is combined with Cystine.	0.96382	TRUE	TRUE	Kohlrabi (FOOD00033)
DB00138	Cystine	FDB011417	3-Phenylpropyl acetate	DDI type 26	The risk or severity of adverse effects can be increased when 3-Phenylpropyl acetate is combined with Cystine.	0.986152	TRUE	TRUE	Ceylon cinnamon (FOOD00051)
DB00138	Cystine	FDB011708	Hexyl butyrate	DDI type 26	The risk or severity of adverse effects can be increased when Hexyl butyrate is combined with Cystine.	0.997942	TRUE	TRUE	Passion fruit (FOOD00128)
DB00138	Cystine	FDB011952	Hexadecane	DDI type 26	The risk or severity of adverse effects can be increased when Cystine is combined with Hexadecane.	0.953436	TRUE	TRUE	Black walnut (FOOD00093)
DB00138	Cystine	FDB011952	Hexadecane	DDI type 26	The risk or severity of adverse effects can be increased when Hexadecane is combined with Cystine.	0.999856	TRUE	TRUE	Black walnut (FOOD00093)
DB00138	Cystine	FDB012059	Benzylamine	DDI type 26	The risk or severity of adverse effects can be increased when Benzylamine is combined with Cystine.	0.99988	TRUE	TRUE	Corn (FOOD00205), Cabbage (FOOD00851), White cabbage (FOOD00887), Carrot (FOOD00245), Wild carrot (FOOD00072), Apple (FOOD00105)
DB00138	Cystine	FDB012060	3,4-Dihydroxybenzaldehyde	DDI type 15	3,4-Dihydroxybenzaldehyde may decrease the excretion rate of Cystine which could result in a higher serum level.	0.995153	TRUE	FALSE	Vinegar (FOOD00628), Grape wine (FOOD00612)
DB00138	Cystine	FDB012123	(±)-erythro-Isoleucine	DDI type 1	Cystine can cause a decrease in the absorption of (±)-erythro-Isoleucine resulting in a reduced serum concentration and potentially a decrease in efficacy.	0.969843	FALSE	FALSE	Casein (FOOD00659), Dried milk (FOOD00689), Thunnus (FOOD00607), Gelatin (FOOD00663), Eggs (FOOD00619), Cheese (FOOD00617), Rabbit (FOOD00528), Atlantic halibut (FOOD00516), Shrimp (FOOD00533), Leavening agent (FOOD00661)
[truncated: 56,646 more rows]

## Sheet: Legend
DFIs determined with DeepDDI for drug compounds taken by the patients with MS as well as DMDs and BTKis.
[truncated: 10 more rows]
